# Supplementary material for: Diversity of Dictyostelid Cellular Slime Molds, Including Two Species New to Science, in Forest Soils of Changbai Mountain, China
Source: PubMed Central journal article supplement (PMC9620775; doi:10.1128/spectrum.02402-22), 2022-10-03
Supplement: spectrum.02402-22-s0001.pdf [file spectrum.02402-22-s0001.pdf]

## Supplementary Files

**Table S1.** The 254 soil samples for isolation of dictyostelids collected from eleven study sites on Changbai Mountain in the Jilin Province of China in 2016 and 2017.

| Number | Data      | Location                         | Habitat                        | Collection people | Latitude (north) | Longitude (east)  | Altitude (m) |
|--------|-----------|----------------------------------|--------------------------------|-------------------|------------------|-------------------|--------------|
| 4905   | 2016.8.28 | Changbai Mountain Nature Reserve | Mixed broadleaf-conifer forest | Y Zou, JG Hou     | 42° 10' 47" 52.8 | 128° 10' 02" 49.2 | 1155         |
| 4906   | 2016.8.28 | Changbai Mountain Nature Reserve | Mixed broadleaf-conifer forest | Y Zou, JG Hou     | 42° 10' 47" 52.8 | 128° 10' 02" 49.2 | 1155         |
| 4907   | 2016.8.28 | Changbai Mountain Nature Reserve | Mixed broadleaf-conifer forest | Y Zou, JG Hou     | 42° 10' 47" 52.8 | 128° 10' 02" 49.2 | 1155         |
| 4908   | 2016.8.28 | Changbai Mountain Nature Reserve | Mixed broadleaf-conifer forest | Y Zou, JG Hou     | 42° 10' 47" 52.8 | 128° 10' 02" 49.2 | 1155         |
| 4909   | 2016.8.28 | Changbai Mountain Nature Reserve | Mixed broadleaf-conifer forest | Y Zou, JG Hou     | 42° 10' 47" 52.8 | 128° 10' 02" 49.2 | 1155         |
| 4910   | 2016.8.28 | Changbai Mountain Nature Reserve | Mixed broadleaf-conifer forest | Y Zou, JG Hou     | 42° 10' 46" 48   | 128° 09' 53" 27.6 | 1133         |
| 4911   | 2016.8.28 | Changbai Mountain Nature Reserve | Mixed broadleaf-conifer forest | Y Zou, JG Hou     | 42° 10' 46" 48   | 128° 09' 53" 27.6 | 1133         |
| 4912   | 2016.8.28 | Changbai Mountain Nature Reserve | Mixed broadleaf-conifer forest | Y Zou, JG Hou     | 42° 10' 46" 48   | 128° 09' 53" 27.6 | 1133         |
| 4913   | 2016.8.28 | Changbai Mountain Nature Reserve | Mixed broadleaf-conifer forest | Y Zou, JG Hou     | 42° 10' 46" 48   | 128° 09' 53" 27.6 | 1133         |
| 4914   | 2016.8.28 | Changbai Mountain Nature Reserve | Mixed broadleaf-conifer forest | Y Zou, JG Hou     | 42° 10' 46" 48   | 128° 09' 53" 27.6 | 1133         |
| 4915   | 2016.8.28 | Changbai Mountain Nature Reserve | Mixed broadleaf-conifer forest | Y Zou, JG Hou     | 42° 10' 56" 38.4 | 128° 10' 00" 54   | 1133         |
| 4916   | 2016.8.28 | Changbai Mountain Nature Reserve | Mixed broadleaf-conifer forest | Y Zou, JG Hou     | 42° 10' 56" 38.4 | 128° 10' 00" 54   | 1133         |
| 4917   | 2016.8.28 | Changbai Mountain Nature Reserve | Mixed broadleaf-conifer forest | Y Zou, JG Hou     | 42° 10' 56" 38.4 | 128° 10' 00" 54   | 1133         |

---

|      |           |                                  |                                |               |                  |                   |      |
|------|-----------|----------------------------------|--------------------------------|---------------|------------------|-------------------|------|
| 4918 | 2016.8.28 | Changbai Mountain Nature Reserve | Mixed broadleaf-conifer forest | Y Zou, JG Hou | 42° 10' 56" 38.4 | 128° 10' 00" 54   | 1133 |
| 4919 | 2016.8.28 | Changbai Mountain Nature Reserve | Mixed broadleaf-conifer forest | Y Zou, JG Hou | 42° 10' 56" 38.4 | 128° 10' 00" 54   | 1133 |
| 4920 | 2016.8.28 | Changbai Mountain Nature Reserve | Mixed broadleaf-conifer forest | Y Zou, JG Hou | 42° 11' 04" 19.2 | 128° 10' 04" 26.4 | 1200 |
| 4921 | 2016.8.28 | Changbai Mountain Nature Reserve | Mixed broadleaf-conifer forest | Y Zou, JG Hou | 42° 11' 04" 19.2 | 128° 10' 04" 26.4 | 1200 |
| 4922 | 2016.8.28 | Changbai Mountain Nature Reserve | Mixed broadleaf-conifer forest | Y Zou, JG Hou | 42° 11' 04" 19.2 | 128° 10' 04" 26.4 | 1200 |
| 4923 | 2016.8.28 | Changbai Mountain Nature Reserve | Mixed broadleaf-conifer forest | Y Zou, JG Hou | 42° 11' 04" 19.2 | 128° 10' 04" 26.4 | 1200 |
| 4924 | 2016.8.28 | Changbai Mountain Nature Reserve | Mixed broadleaf-conifer forest | Y Zou, JG Hou | 42° 11' 04" 19.2 | 128° 10' 04" 26.4 | 1200 |
| 4925 | 2016.8.28 | Changbai Mountain Nature Reserve | Mixed broadleaf-conifer forest | Y Zou, JG Hou | 42° 11' 04" 26.4 | 128° 10' 12" 25.2 | 1134 |
| 4926 | 2016.8.28 | Changbai Mountain Nature Reserve | Mixed broadleaf-conifer forest | Y Zou, JG Hou | 42° 11' 04" 26.4 | 128° 10' 12" 25.2 | 1134 |
| 4927 | 2016.8.28 | Changbai Mountain Nature Reserve | Mixed broadleaf-conifer forest | Y Zou, JG Hou | 42° 11' 04" 26.4 | 128° 10' 12" 25.2 | 1134 |
| 4928 | 2016.8.28 | Changbai Mountain Nature Reserve | Mixed broadleaf-conifer forest | Y Zou, JG Hou | 42° 11' 04" 26.4 | 128° 10' 12" 25.2 | 1134 |
| 4929 | 2016.8.28 | Changbai Mountain Nature Reserve | Mixed broadleaf-conifer forest | Y Zou, JG Hou | 42° 11' 04" 26.4 | 128° 10' 12" 25.2 | 1134 |
| 4930 | 2016.8.28 | Changbai Mountain Nature Reserve | Mixed broadleaf-conifer forest | Y Zou, JG Hou | 42° 10' 45" 14.4 | 128° 10' 06" 21.6 | 1151 |
| 4931 | 2016.8.28 | Changbai Mountain Nature Reserve | Mixed broadleaf-conifer forest | Y Zou, JG Hou | 42° 10' 45" 14.4 | 128° 10' 06" 21.6 | 1151 |
| 4932 | 2016.8.28 | Changbai Mountain Nature Reserve | Mixed broadleaf-conifer forest | Y Zou, JG Hou | 42° 10' 45" 14.4 | 128° 10' 06" 21.6 | 1151 |
| 4933 | 2016.8.28 | Changbai Mountain Nature Reserve | Mixed broadleaf-conifer forest | Y Zou, JG Hou | 42° 10' 45" 14.4 | 128° 10' 06" 21.6 | 1151 |

---

---

|      |           |                                  |                                |               |                  |                   |      |
|------|-----------|----------------------------------|--------------------------------|---------------|------------------|-------------------|------|
| 4934 | 2016.8.28 | Changbai Mountain Nature Reserve | Mixed broadleaf-conifer forest | Y Zou, JG Hou | 42° 10' 45" 14.4 | 128° 10' 06" 21.6 | 1151 |
| 4935 | 2016.8.28 | Changbai Mountain Nature Reserve | Mixed broadleaf-conifer forest | Y Zou, JG Hou | 42° 10' 40" 44.4 | 128° 10' 08" 13.2 | 1101 |
| 4936 | 2016.8.28 | Changbai Mountain Nature Reserve | Mixed broadleaf-conifer forest | Y Zou, JG Hou | 42° 10' 40" 44.4 | 128° 10' 08" 13.2 | 1101 |
| 4937 | 2016.8.28 | Changbai Mountain Nature Reserve | Mixed broadleaf-conifer forest | Y Zou, JG Hou | 42° 10' 40" 44.4 | 128° 10' 08" 13.2 | 1101 |
| 4938 | 2016.8.28 | Changbai Mountain Nature Reserve | Mixed broadleaf-conifer forest | Y Zou, JG Hou | 42° 10' 40" 44.4 | 128° 10' 08" 13.2 | 1101 |
| 4939 | 2016.8.28 | Changbai Mountain Nature Reserve | Mixed broadleaf-conifer forest | Y Zou, JG Hou | 42° 10' 41" 06   | 128° 10' 11" 02.4 | 1161 |
| 4940 | 2016.8.28 | Changbai Mountain Nature Reserve | Mixed broadleaf-conifer forest | Y Zou, JG Hou | 42° 10' 41" 06   | 128° 10' 11" 02.4 | 1161 |
| 4941 | 2016.8.28 | Changbai Mountain Nature Reserve | Mixed broadleaf-conifer forest | Y Zou, JG Hou | 42° 10' 41" 06   | 128° 10' 11" 02.4 | 1161 |
| 4942 | 2016.8.28 | Changbai Mountain Nature Reserve | Mixed broadleaf-conifer forest | Y Zou, JG Hou | 42° 10' 41" 06   | 128° 10' 11" 02.4 | 1161 |
| 4943 | 2016.8.28 | Changbai Mountain Nature Reserve | Mixed broadleaf-conifer forest | Y Zou, JG Hou | 42° 10' 41" 06   | 128° 10' 11" 02.4 | 1161 |
| 4944 | 2016.8.28 | Changbai Mountain Nature Reserve | Mixed broadleaf-conifer forest | Y Zou, JG Hou | 42° 10' 36" 50.4 | 128° 10' 22" 12   | 1160 |
| 4945 | 2016.8.28 | Changbai Mountain Nature Reserve | Mixed broadleaf-conifer forest | Y Zou, JG Hou | 42° 10' 36" 50.4 | 128° 10' 22" 12   | 1160 |
| 4946 | 2016.8.28 | Changbai Mountain Nature Reserve | Mixed broadleaf-conifer forest | Y Zou, JG Hou | 42° 10' 36" 50.4 | 128° 10' 22" 12   | 1160 |
| 4947 | 2016.8.28 | Changbai Mountain Nature Reserve | Mixed broadleaf-conifer forest | Y Zou, JG Hou | 42° 10' 36" 50.4 | 128° 10' 22" 12   | 1160 |
| 4948 | 2016.8.28 | Changbai Mountain Nature Reserve | Mixed broadleaf-conifer forest | Y Zou, JG Hou | 42° 10' 36" 50.4 | 128° 10' 22" 12   | 1160 |
| 4949 | 2016.8.29 | Changbai Mountain Nature Reserve | Mixed broadleaf-conifer forest | Y Zou, JG Hou | 42° 04' 13" 44.4 | 128° 03' 49" 55.2 | 1670 |

---

---

|      |           |                                  |                                |               |                  |                   |      |
|------|-----------|----------------------------------|--------------------------------|---------------|------------------|-------------------|------|
| 4950 | 2016.8.29 | Changbai Mountain Nature Reserve | Mixed broadleaf-conifer forest | Y Zou, JG Hou | 42° 04' 13" 44.4 | 128° 03' 49" 55.2 | 1670 |
| 4951 | 2016.8.29 | Changbai Mountain Nature Reserve | Mixed broadleaf-conifer forest | Y Zou, JG Hou | 42° 04' 13" 44.4 | 128° 03' 49" 55.2 | 1670 |
| 4952 | 2016.8.29 | Changbai Mountain Nature Reserve | Mixed broadleaf-conifer forest | Y Zou, JG Hou | 42° 04' 13" 44.4 | 128° 03' 49" 55.2 | 1670 |
| 4953 | 2016.8.29 | Changbai Mountain Nature Reserve | Mixed broadleaf-conifer forest | Y Zou, JG Hou | 42° 04' 13" 44.4 | 128° 03' 49" 55.2 | 1670 |
| 4954 | 2016.8.29 | Changbai Mountain Nature Reserve | Mixed broadleaf-conifer forest | Y Zou, JG Hou | 42° 04' 10" 44.4 | 128° 03' 55" 30   | 1724 |
| 4955 | 2016.8.29 | Changbai Mountain Nature Reserve | Mixed broadleaf-conifer forest | Y Zou, JG Hou | 42° 04' 10" 44.4 | 128° 03' 55" 30   | 1724 |
| 4956 | 2016.8.29 | Changbai Mountain Nature Reserve | Mixed broadleaf-conifer forest | Y Zou, JG Hou | 42° 04' 10" 44.4 | 128° 03' 55" 30   | 1724 |
| 4957 | 2016.8.29 | Changbai Mountain Nature Reserve | Mixed broadleaf-conifer forest | Y Zou, JG Hou | 42° 04' 10" 44.4 | 128° 03' 55" 30   | 1724 |
| 4958 | 2016.8.29 | Changbai Mountain Nature Reserve | Mixed broadleaf-conifer forest | Y Zou, JG Hou | 42° 04' 10" 44.4 | 128° 03' 55" 30   | 1724 |
| 4959 | 2016.8.29 | Changbai Mountain Nature Reserve | Mixed broadleaf-conifer forest | Y Zou, JG Hou | 42° 04' 10" 44.4 | 128° 03' 55" 30   | 1724 |
| 4960 | 2016.8.29 | Changbai Mountain Nature Reserve | Mixed broadleaf-conifer forest | Y Zou, JG Hou | 42° 04' 10" 44.4 | 128° 03' 55" 30   | 1724 |
| 4961 | 2016.8.29 | Changbai Mountain Nature Reserve | Mixed broadleaf-conifer forest | Y Zou, JG Hou | 42° 04' 10" 44.4 | 128° 03' 55" 30   | 1724 |
| 4962 | 2016.8.29 | Changbai Mountain Nature Reserve | Coniferous forest              | Y Zou, JG Hou | 42° 04' 06" 43.2 | 128° 03' 56" 45.6 | 1745 |
| 4963 | 2016.8.29 | Changbai Mountain Nature Reserve | Coniferous forest              | Y Zou, JG Hou | 42° 04' 06" 43.2 | 128° 03' 56" 45.6 | 1745 |
| 4964 | 2016.8.29 | Changbai Mountain Nature Reserve | Coniferous forest              | Y Zou, JG Hou | 42° 04' 06" 43.2 | 128° 03' 56" 45.6 | 1745 |
| 4965 | 2016.8.29 | Changbai Mountain Nature Reserve | Coniferous forest              | Y Zou, JG Hou | 42° 04' 06" 43.2 | 128° 03' 56" 45.6 | 1745 |

---

---

|      |           |                                  |                          |               |                  |                   |      |
|------|-----------|----------------------------------|--------------------------|---------------|------------------|-------------------|------|
| 4966 | 2016.8.29 | Changbai Mountain Nature Reserve | Coniferous forest        | Y Zou, JG Hou | 42° 04' 06" 43.2 | 128° 03' 56" 45.6 | 1745 |
| 4967 | 2016.8.29 | Changbai Mountain Nature Reserve | Coniferous forest        | Y Zou, JG Hou | 42° 04' 06" 43.2 | 128° 03' 56" 45.6 | 1745 |
| 4968 | 2016.8.29 | Changbai Mountain Nature Reserve | Coniferous forest        | Y Zou, JG Hou | 42° 04' 06" 43.2 | 128° 03' 56" 45.6 | 1745 |
| 4969 | 2016.8.29 | Changbai Mountain Nature Reserve | Coniferous forest        | Y Zou, JG Hou | 42° 04' 06" 43.2 | 128° 03' 56" 45.6 | 1745 |
| 4970 | 2016.8.29 | Changbai Mountain Nature Reserve | Coniferous forest        | Y Zou, JG Hou | 42° 04' 04" 26.4 | 128° 03' 59" 34.8 | 1780 |
| 4971 | 2016.8.29 | Changbai Mountain Nature Reserve | Coniferous forest        | Y Zou, JG Hou | 42° 04' 04" 26.4 | 128° 03' 59" 34.8 | 1780 |
| 4972 | 2016.8.29 | Changbai Mountain Nature Reserve | Coniferous forest        | Y Zou, JG Hou | 42° 04' 04" 26.4 | 128° 03' 59" 34.8 | 1780 |
| 4973 | 2016.8.29 | Changbai Mountain Nature Reserve | Coniferous forest        | Y Zou, JG Hou | 42° 04' 04" 26.4 | 128° 03' 59" 34.8 | 1780 |
| 4974 | 2016.8.29 | Changbai Mountain Nature Reserve | Coniferous forest        | Y Zou, JG Hou | 42° 04' 04" 26.4 | 128° 03' 59" 34.8 | 1780 |
| 4975 | 2016.8.29 | Changbai Mountain Nature Reserve | Coniferous forest        | Y Zou, JG Hou | 42° 04' 04" 26.4 | 128° 03' 59" 34.8 | 1780 |
| 4976 | 2016.8.29 | Changbai Mountain Nature Reserve | Coniferous forest        | Y Zou, JG Hou | 42° 04' 04" 26.4 | 128° 03' 59" 34.8 | 1780 |
| 4977 | 2016.8.29 | Changbai Mountain Nature Reserve | Coniferous forest        | Y Zou, JG Hou | 42° 04' 04" 26.4 | 128° 03' 59" 34.8 | 1780 |
| 4978 | 2016.8.29 | Changbai Mountain Nature Reserve | Mix birch-conifer forest | Y Zou, JG Hou | 42° 04' 03" 50.4 | 128° 03' 59" 52.8 | 1807 |
| 4979 | 2016.8.29 | Changbai Mountain Nature Reserve | Mix birch-conifer forest | Y Zou, JG Hou | 42° 04' 03" 50.4 | 128° 03' 59" 52.8 | 1807 |
| 4980 | 2016.8.29 | Changbai Mountain Nature Reserve | Mix birch-conifer forest | Y Zou, JG Hou | 42° 04' 03" 50.4 | 128° 03' 59" 52.8 | 1807 |
| 4981 | 2016.8.29 | Changbai Mountain Nature Reserve | Mix birch-conifer forest | Y Zou, JG Hou | 42° 04' 03" 50.4 | 128° 03' 59" 52.8 | 1807 |

---

---

|      |           |                                  |                          |               |                  |                   |      |
|------|-----------|----------------------------------|--------------------------|---------------|------------------|-------------------|------|
| 4982 | 2016.8.29 | Changbai Mountain Nature Reserve | Mix birch-conifer forest | Y Zou, JG Hou | 42° 04' 03" 50.4 | 128° 03' 59" 52.8 | 1807 |
| 4983 | 2016.8.29 | Changbai Mountain Nature Reserve | Mix birch-conifer forest | Y Zou, JG Hou | 42° 04' 03" 50.4 | 128° 03' 59" 52.8 | 1807 |
| 4984 | 2016.8.29 | Changbai Mountain Nature Reserve | Mix birch-conifer forest | Y Zou, JG Hou | 42° 04' 03" 50.4 | 128° 03' 59" 52.8 | 1807 |
| 4985 | 2016.8.29 | Changbai Mountain Nature Reserve | Mix birch-conifer forest | Y Zou, JG Hou | 42° 04' 03" 50.4 | 128° 03' 59" 52.8 | 1807 |
| 4986 | 2016.8.29 | Changbai Mountain Nature Reserve | Alpine birch forest      | Y Zou, JG Hou | 42° 04' 00" 43.2 | 128° 04' 03" 50.4 | 1840 |
| 4987 | 2016.8.29 | Changbai Mountain Nature Reserve | Alpine birch forest      | Y Zou, JG Hou | 42° 04' 00" 43.2 | 128° 04' 03" 50.4 | 1840 |
| 4988 | 2016.8.29 | Changbai Mountain Nature Reserve | Alpine birch forest      | Y Zou, JG Hou | 42° 04' 00" 43.2 | 128° 04' 03" 50.4 | 1840 |
| 4989 | 2016.8.29 | Changbai Mountain Nature Reserve | Alpine birch forest      | Y Zou, JG Hou | 42° 04' 00" 43.2 | 128° 04' 03" 50.4 | 1840 |
| 4990 | 2016.8.29 | Changbai Mountain Nature Reserve | Alpine birch forest      | Y Zou, JG Hou | 42° 04' 00" 43.2 | 128° 04' 03" 50.4 | 1840 |
| 4991 | 2016.8.29 | Changbai Mountain Nature Reserve | Alpine birch forest      | Y Zou, JG Hou | 42° 04' 00" 43.2 | 128° 04' 03" 50.4 | 1840 |
| 4992 | 2016.8.29 | Changbai Mountain Nature Reserve | Alpine birch forest      | Y Zou, JG Hou | 42° 04' 00" 43.2 | 128° 04' 03" 50.4 | 1840 |
| 4993 | 2016.8.29 | Changbai Mountain Nature Reserve | Alpine birch forest      | Y Zou, JG Hou | 42° 04' 00" 43.2 | 128° 04' 03" 50.4 | 1840 |
| 4994 | 2016.8.29 | Changbai Mountain Nature Reserve | Alpine birch forest      | Y Zou, JG Hou | 42° 03' 47" 20.4 | 128° 04' 02" 45.6 | 1896 |
| 4995 | 2016.8.29 | Changbai Mountain Nature Reserve | Alpine birch forest      | Y Zou, JG Hou | 42° 03' 47" 20.4 | 128° 04' 02" 45.6 | 1896 |
| 4996 | 2016.8.29 | Changbai Mountain Nature Reserve | Alpine birch forest      | Y Zou, JG Hou | 42° 03' 47" 20.4 | 128° 04' 02" 45.6 | 1896 |
| 4997 | 2016.8.29 | Changbai Mountain Nature Reserve | Alpine birch forest      | Y Zou, JG Hou | 42° 03' 47" 20.4 | 128° 04' 02" 45.6 | 1896 |

---

---

|      |           |                                  |                     |               |                  |                   |      |
|------|-----------|----------------------------------|---------------------|---------------|------------------|-------------------|------|
| 4998 | 2016.8.29 | Changbai Mountain Nature Reserve | Alpine birch forest | Y Zou, JG Hou | 42° 03' 47" 20.4 | 128° 04' 02" 45.6 | 1896 |
| 4999 | 2016.8.29 | Changbai Mountain Nature Reserve | Alpine birch forest | Y Zou, JG Hou | 42° 03' 47" 20.4 | 128° 04' 02" 45.6 | 1896 |
| 5000 | 2016.8.29 | Changbai Mountain Nature Reserve | Alpine birch forest | Y Zou, JG Hou | 42° 03' 47" 20.4 | 128° 04' 02" 45.6 | 1896 |
| 5001 | 2016.8.29 | Changbai Mountain Nature Reserve | Alpine birch forest | Y Zou, JG Hou | 42° 03' 47" 20.4 | 128° 04' 02" 45.6 | 1896 |
| 5002 | 2016.8.29 | Changbai Mountain Nature Reserve | Alpine birch forest | Y Zou, JG Hou | 42° 03' 34" 15.6 | 128° 04' 04" 40.8 | 1958 |
| 5003 | 2016.8.29 | Changbai Mountain Nature Reserve | Alpine birch forest | Y Zou, JG Hou | 42° 03' 34" 15.6 | 128° 04' 04" 40.8 | 1958 |
| 5004 | 2016.8.29 | Changbai Mountain Nature Reserve | Alpine birch forest | Y Zou, JG Hou | 42° 03' 34" 15.6 | 128° 04' 04" 40.8 | 1958 |
| 5005 | 2016.8.29 | Changbai Mountain Nature Reserve | Alpine birch forest | Y Zou, JG Hou | 42° 03' 34" 15.6 | 128° 04' 04" 40.8 | 1958 |
| 5006 | 2016.8.29 | Changbai Mountain Nature Reserve | Alpine birch forest | Y Zou, JG Hou | 42° 03' 34" 15.6 | 128° 04' 04" 40.8 | 1958 |
| 5007 | 2016.8.29 | Changbai Mountain Nature Reserve | Alpine birch forest | Y Zou, JG Hou | 42° 03' 34" 15.6 | 128° 04' 04" 40.8 | 1958 |
| 5008 | 2016.8.29 | Changbai Mountain Nature Reserve | Alpine birch forest | Y Zou, JG Hou | 42° 03' 34" 15.6 | 128° 04' 04" 40.8 | 1958 |
| 5009 | 2016.8.29 | Changbai Mountain Nature Reserve | Alpine birch forest | Y Zou, JG Hou | 42° 03' 34" 15.6 | 128° 04' 04" 40.8 | 1958 |
| 5010 | 2016.8.29 | Changbai Mountain Nature Reserve | Alpine shrubland    | Y Zou, JG Hou | 42° 03' 32" 06   | 128° 04' 05" 13.2 | 1979 |
| 5011 | 2016.8.29 | Changbai Mountain Nature Reserve | Alpine shrubland    | Y Zou, JG Hou | 42° 03' 32" 06   | 128° 04' 05" 13.2 | 1979 |
| 5012 | 2016.8.29 | Changbai Mountain Nature Reserve | Alpine shrubland    | Y Zou, JG Hou | 42° 03' 32" 06   | 128° 04' 05" 13.2 | 1979 |
| 5013 | 2016.8.29 | Changbai Mountain Nature Reserve | Alpine shrubland    | Y Zou, JG Hou | 42° 03' 32" 06   | 128° 04' 05" 13.2 | 1979 |

---

---

|      |           |                                  |                        |               |                  |                   |      |
|------|-----------|----------------------------------|------------------------|---------------|------------------|-------------------|------|
| 5014 | 2016.8.29 | Changbai Mountain Nature Reserve | Alpine shrubland       | Y Zou, JG Hou | 42° 03' 32" 06   | 128° 04' 05" 13.2 | 1979 |
| 5015 | 2016.8.29 | Changbai Mountain Nature Reserve | Alpine shrubland       | Y Zou, JG Hou | 42° 03' 32" 06   | 128° 04' 05" 13.2 | 1979 |
| 5016 | 2016.8.29 | Changbai Mountain Nature Reserve | Alpine shrubland       | Y Zou, JG Hou | 42° 03' 32" 06   | 128° 04' 05" 13.2 | 1979 |
| 5017 | 2016.8.29 | Changbai Mountain Nature Reserve | Alpine shrubland       | Y Zou, JG Hou | 42° 03' 32" 06   | 128° 04' 05" 13.2 | 1979 |
| 5018 | 2016.8.29 | Changbai Mountain Nature Reserve | Alpine grassland       | Y Zou, JG Hou | 42° 03' 22" 44.4 | 128° 04' 00" 57.6 | 2006 |
| 5019 | 2016.8.29 | Changbai Mountain Nature Reserve | Alpine grassland       | Y Zou, JG Hou | 42° 03' 22" 44.4 | 128° 04' 00" 57.6 | 2006 |
| 5020 | 2016.8.29 | Changbai Mountain Nature Reserve | Alpine grassland       | Y Zou, JG Hou | 42° 03' 22" 44.4 | 128° 04' 00" 57.6 | 2006 |
| 5021 | 2016.8.29 | Changbai Mountain Nature Reserve | Alpine grassland       | Y Zou, JG Hou | 42° 03' 22" 44.4 | 128° 04' 00" 57.6 | 2006 |
| 5022 | 2016.8.29 | Changbai Mountain Nature Reserve | Alpine grassland       | Y Zou, JG Hou | 42° 03' 22" 44.4 | 128° 04' 00" 57.6 | 2006 |
| 5023 | 2016.8.29 | Changbai Mountain Nature Reserve | Small broadleaf forest | Y Zou, JG Hou | 42° 03' 19" 15.6 | 128° 03' 58" 15.6 | 2018 |
| 5024 | 2016.8.29 | Changbai Mountain Nature Reserve | Small broadleaf forest | Y Zou, JG Hou | 42° 03' 19" 15.6 | 128° 03' 58" 15.6 | 2018 |
| 5025 | 2016.8.29 | Changbai Mountain Nature Reserve | Small broadleaf forest | Y Zou, JG Hou | 42° 03' 19" 15.6 | 128° 03' 58" 15.6 | 2018 |
| 5026 | 2016.8.29 | Changbai Mountain Nature Reserve | Small broadleaf forest | Y Zou, JG Hou | 42° 03' 19" 15.6 | 128° 03' 58" 15.6 | 2018 |
| 5027 | 2016.8.29 | Changbai Mountain Nature Reserve | Small broadleaf forest | Y Zou, JG Hou | 42° 03' 19" 15.6 | 128° 03' 58" 15.6 | 2018 |
| 5028 | 2016.8.29 | Changbai Mountain Nature Reserve | Small broadleaf forest | Y Zou, JG Hou | 42° 03' 19" 15.6 | 128° 03' 58" 15.6 | 2018 |
| 5029 | 2016.8.29 | Changbai Mountain Nature Reserve | Small broadleaf forest | Y Zou, JG Hou | 42° 03' 19" 15.6 | 128° 03' 58" 15.6 | 2018 |

---



---

|      |           |                                  |                                |               |                  |                   |      |
|------|-----------|----------------------------------|--------------------------------|---------------|------------------|-------------------|------|
| 5030 | 2016.8.29 | Changbai Mountain Nature Reserve | Small broadleaf forest         | Y Zou, JG Hou | 42° 03' 19" 15.6 | 128° 03' 58" 15.6 | 2018 |
| 5031 | 2016.8.29 | Changbai Mountain Nature Reserve | Tundra                         | Y Zou, JG Hou | 42° 03' 14" 09.6 | 128° 03' 59" 52.8 | 2038 |
| 5032 | 2016.8.29 | Changbai Mountain Nature Reserve | Tundra                         | Y Zou, JG Hou | 42° 03' 14" 09.6 | 128° 03' 59" 52.8 | 2038 |
| 5033 | 2016.8.29 | Changbai Mountain Nature Reserve | Tundra                         | Y Zou, JG Hou | 42° 03' 14" 09.6 | 128° 03' 59" 52.8 | 2038 |
| 5034 | 2016.8.29 | Changbai Mountain Nature Reserve | Tundra                         | Y Zou, JG Hou | 42° 03' 14" 09.6 | 128° 03' 59" 52.8 | 2038 |
| 5035 | 2016.8.29 | Changbai Mountain Nature Reserve | Tundra                         | Y Zou, JG Hou | 42° 03' 14" 09.6 | 128° 03' 59" 52.8 | 2038 |
| 5036 | 2016.8.29 | Changbai Mountain Nature Reserve | Tundra                         | Y Zou, JG Hou | 42° 03' 14" 09.6 | 128° 03' 59" 52.8 | 2038 |
| 5037 | 2016.8.29 | Changbai Mountain Nature Reserve | Tundra                         | Y Zou, JG Hou | 42° 03' 14" 09.6 | 128° 03' 59" 52.8 | 2038 |
| 5038 | 2016.8.29 | Changbai Mountain Nature Reserve | Tundra                         | Y Zou, JG Hou | 42° 03' 14" 09.6 | 128° 03' 59" 52.8 | 2038 |
| 5039 | 2016.8.29 | Changbai Mountain Nature Reserve | Mixed broadleaf-conifer forest | Y Zou, JG Hou | 42° 05' 07" 33.6 | 128° 04' 28" 08.4 | 1613 |
| 5040 | 2016.8.29 | Changbai Mountain Nature Reserve | Mixed broadleaf-conifer forest | Y Zou, JG Hou | 42° 05' 07" 33.6 | 128° 04' 28" 08.4 | 1613 |
| 5041 | 2016.8.29 | Changbai Mountain Nature Reserve | Mixed broadleaf-conifer forest | Y Zou, JG Hou | 42° 05' 07" 33.6 | 128° 04' 28" 08.4 | 1613 |
| 5042 | 2016.8.29 | Changbai Mountain Nature Reserve | Mixed broadleaf-conifer forest | Y Zou, JG Hou | 42° 05' 07" 33.6 | 128° 04' 28" 08.4 | 1613 |
| 5043 | 2016.8.29 | Changbai Mountain Nature Reserve | Mixed broadleaf-conifer forest | Y Zou, JG Hou | 42° 05' 07" 33.6 | 128° 04' 28" 08.4 | 1613 |
| 5044 | 2016.8.29 | Changbai Mountain Nature Reserve | Mixed broadleaf-conifer forest | Y Zou, JG Hou | 42° 05' 07" 33.6 | 128° 04' 28" 08.4 | 1613 |
| 5045 | 2016.8.29 | Changbai Mountain Nature Reserve | Mixed broadleaf-conifer forest | Y Zou, JG Hou | 42° 05' 07" 33.6 | 128° 04' 28" 08.4 | 1613 |

---

---

|      |           |                                  |                                |               |                  |                   |      |
|------|-----------|----------------------------------|--------------------------------|---------------|------------------|-------------------|------|
| 5046 | 2016.8.29 | Changbai Mountain Nature Reserve | Mixed broadleaf-conifer forest | Y Zou, JG Hou | 42° 05' 07" 33.6 | 128° 04' 28" 08.4 | 1613 |
| 5047 | 2016.8.30 | Beauty pine park                 | Mixed broadleaf-conifer forest | Y Zou, JG Hou | 42° 26' 18" 18   | 128° 07' 03" 00   | 709  |
| 5048 | 2016.8.30 | Beauty pine park                 | Mixed broadleaf-conifer forest | Y Zou, JG Hou | 42° 26' 18" 18   | 128° 07' 03" 00   | 709  |
| 5049 | 2016.8.30 | Beauty pine park                 | Mixed broadleaf-conifer forest | Y Zou, JG Hou | 42° 26' 18" 18   | 128° 07' 03" 00   | 709  |
| 5050 | 2016.8.30 | Beauty pine park                 | Mixed broadleaf-conifer forest | Y Zou, JG Hou | 42° 26' 18" 18   | 128° 07' 03" 00   | 709  |
| 5051 | 2016.8.30 | Beauty pine park                 | Mixed broadleaf-conifer forest | Y Zou, JG Hou | 42° 26' 18" 18   | 128° 07' 03" 00   | 709  |
| 5052 | 2016.8.30 | Beauty pine park                 | Mixed broadleaf-conifer forest | Y Zou, JG Hou | 42° 26' 18" 18   | 128° 07' 03" 00   | 709  |
| 5053 | 2016.8.30 | Beauty pine park                 | Mixed broadleaf-conifer forest | Y Zou, JG Hou | 42° 26' 18" 18   | 128° 07' 03" 00   | 709  |
| 5054 | 2016.8.30 | Beauty pine park                 | Mixed broadleaf-conifer forest | Y Zou, JG Hou | 42° 26' 18" 18   | 128° 07' 03" 00   | 709  |
| 5055 | 2016.8.30 | Beauty pine park                 | Mixed broadleaf-conifer forest | Y Zou, JG Hou | 42° 26' 19" 15.6 | 128° 07' 03" 36   | 720  |
| 5056 | 2016.8.30 | Beauty pine park                 | Mixed broadleaf-conifer forest | Y Zou, JG Hou | 42° 26' 19" 15.6 | 128° 07' 03" 36   | 720  |
| 5057 | 2016.8.30 | Beauty pine park                 | Mixed broadleaf-conifer forest | Y Zou, JG Hou | 42° 26' 19" 15.6 | 128° 07' 03" 36   | 720  |
| 5058 | 2016.8.30 | Beauty pine park                 | Mixed broadleaf-conifer forest | Y Zou, JG Hou | 42° 26' 19" 15.6 | 128° 07' 03" 36   | 720  |
| 5059 | 2016.8.30 | Beauty pine park                 | Mixed broadleaf-conifer forest | Y Zou, JG Hou | 42° 26' 19" 15.6 | 128° 07' 03" 36   | 720  |
| 5060 | 2016.8.30 | Beauty pine park                 | Mixed broadleaf-conifer forest | Y Zou, JG Hou | 42° 26' 19" 15.6 | 128° 07' 03" 36   | 720  |
| 5061 | 2016.8.30 | Beauty pine park                 | Mixed broadleaf-conifer forest | Y Zou, JG Hou | 42° 26' 19" 15.6 | 128° 07' 03" 36   | 720  |
| 5062 | 2016.8.30 | Beauty pine park                 | Mixed broadleaf-conifer forest | Y Zou, JG Hou | 42° 26' 19" 15.6 | 128° 07' 03" 36   | 720  |
| 5063 | 2016.8.30 | Beauty pine park                 | Mixed broadleaf-conifer forest | Y Zou, JG Hou | 42° 26' 23" 20.4 | 128° 07' 1" 44.4  | 721  |
| 5064 | 2016.8.30 | Beauty pine park                 | Mixed broadleaf-conifer forest | Y Zou, JG Hou | 42° 26' 23" 20.4 | 128° 07' 1" 44.4  | 721  |
| 5065 | 2016.8.30 | Beauty pine park                 | Mixed broadleaf-conifer forest | Y Zou, JG Hou | 42° 26' 23" 20.4 | 128° 07' 1" 44.4  | 721  |
| 5066 | 2016.8.30 | Beauty pine park                 | Mixed broadleaf-conifer forest | Y Zou, JG Hou | 42° 26' 23" 20.4 | 128° 07' 1" 44.4  | 721  |
| 5067 | 2016.8.30 | Beauty pine park                 | Mixed broadleaf-conifer forest | Y Zou, JG Hou | 42° 26' 23" 20.4 | 128° 07' 1" 44.4  | 721  |
| 5068 | 2016.8.30 | Beauty pine park                 | Mixed broadleaf-conifer forest | Y Zou, JG Hou | 42° 26' 23" 20.4 | 128° 07' 1" 44.4  | 721  |
| 5069 | 2016.8.30 | Beauty pine park                 | Mixed broadleaf-conifer forest | Y Zou, JG Hou | 42° 26' 23" 20.4 | 128° 07' 1" 44.4  | 721  |
| 5070 | 2016.8.30 | Beauty pine park                 | Mixed broadleaf-conifer forest | Y Zou, JG Hou | 42° 26' 23" 20.4 | 128° 07' 1" 44.4  | 721  |
| 5071 | 2016.8.30 | Beauty pine park                 | Mixed broadleaf-conifer forest | Y Zou, JG Hou | 42° 26' 22" 08.4 | 128° 07' 00" 25.2 | 726  |
| 5072 | 2016.8.30 | Beauty pine park                 | Mixed broadleaf-conifer forest | Y Zou, JG Hou | 42° 26' 22" 08.4 | 128° 07' 00" 25.2 | 726  |
| 5073 | 2016.8.30 | Beauty pine park                 | Mixed broadleaf-conifer forest | Y Zou, JG Hou | 42° 26' 22" 08.4 | 128° 07' 00" 25.2 | 726  |
| 5074 | 2016.8.30 | Beauty pine park                 | Mixed broadleaf-conifer forest | Y Zou, JG Hou | 42° 26' 22" 08.4 | 128° 07' 00" 25.2 | 726  |
| 5075 | 2016.8.30 | Beauty pine park                 | Mixed broadleaf-conifer forest | Y Zou, JG Hou | 42° 26' 22" 08.4 | 128° 07' 00" 25.2 | 726  |
| 5076 | 2016.8.30 | Beauty pine park                 | Mixed broadleaf-conifer forest | Y Zou, JG Hou | 42° 26' 22" 08.4 | 128° 07' 00" 25.2 | 726  |
| 5077 | 2016.8.30 | Beauty pine park                 | Mixed broadleaf-conifer forest | Y Zou, JG Hou | 42° 26' 22" 08.4 | 128° 07' 00" 25.2 | 726  |

---



|      |           |                                  |                                |               |                  |                   |      |
|------|-----------|----------------------------------|--------------------------------|---------------|------------------|-------------------|------|
| 5111 | 2016.8.30 | Beauty pine park                 | Mixed broadleaf-conifer forest | Y Zou, JG Hou | 42° 26' 13" 55.2 | 128° 07' 08" 13.2 | 715  |
| 5112 | 2016.8.30 | Beauty pine park                 | Mixed broadleaf-conifer forest | Y Zou, JG Hou | 42° 26' 13" 55.2 | 128° 07' 08" 13.2 | 715  |
| 5113 | 2016.8.30 | Beauty pine park                 | Mixed broadleaf-conifer forest | Y Zou, JG Hou | 42° 26' 13" 55.2 | 128° 07' 08" 13.2 | 715  |
| 5114 | 2016.8.30 | Beauty pine park                 | Mixed broadleaf-conifer forest | Y Zou, JG Hou | 42° 26' 13" 55.2 | 128° 07' 08" 13.2 | 715  |
| 5115 | 2016.8.30 | Beauty pine park                 | Mixed broadleaf-conifer forest | Y Zou, JG Hou | 42° 26' 13" 55.2 | 128° 07' 08" 13.2 | 715  |
| 5116 | 2016.8.30 | Beauty pine park                 | Mixed broadleaf-conifer forest | Y Zou, JG Hou | 42° 26' 13" 55.2 | 128° 07' 08" 13.2 | 715  |
| 5117 | 2016.8.30 | Beauty pine park                 | Mixed broadleaf-conifer forest | Y Zou, JG Hou | 42° 26' 13" 55.2 | 128° 07' 08" 13.2 | 715  |
| 5118 | 2016.8.30 | Beauty pine park                 | Mixed broadleaf-conifer forest | Y Zou, JG Hou | 42° 26' 15" 25.2 | 128° 07' 9" 57.6  | 721  |
| 5119 | 2016.8.30 | Beauty pine park                 | Mixed broadleaf-conifer forest | Y Zou, JG Hou | 42° 26' 15" 25.2 | 128° 07' 9" 57.6  | 721  |
| 5120 | 2016.8.30 | Beauty pine park                 | Mixed broadleaf-conifer forest | Y Zou, JG Hou | 42° 26' 15" 25.2 | 128° 07' 9" 57.6  | 721  |
| 5121 | 2016.8.30 | Beauty pine park                 | Mixed broadleaf-conifer forest | Y Zou, JG Hou | 42° 26' 15" 25.2 | 128° 07' 9" 57.6  | 721  |
| 5122 | 2016.8.30 | Beauty pine park                 | Mixed broadleaf-conifer forest | Y Zou, JG Hou | 42° 26' 15" 25.2 | 128° 07' 9" 57.6  | 721  |
| 5123 | 2016.8.30 | Beauty pine park                 | Mixed broadleaf-conifer forest | Y Zou, JG Hou | 42° 26' 15" 25.2 | 128° 07' 9" 57.6  | 721  |
| 5124 | 2016.8.30 | Beauty pine park                 | Mixed broadleaf-conifer forest | Y Zou, JG Hou | 42° 26' 15" 25.2 | 128° 07' 9" 57.6  | 721  |
| 5125 | 2016.8.30 | Beauty pine park                 | Mixed broadleaf-conifer forest | Y Zou, JG Hou | 42° 26' 15" 25.2 | 128° 07' 9" 57.6  | 721  |
| 5728 | 2017.9.16 | Hanconggou                       | Mixed broadleaf-conifer forest | Y Zou         | 42° 24' 08" 33   | 128° 06' 12" 56   | 725  |
| 5729 | 2017.9.16 | Xibao forestry farm              | Mixed broadleaf-conifer forest | Y Zou         | 42° 22' 17" 84   | 128° 00' 13" 74   | 828  |
| 5730 | 2017.9.16 | Huangsongpu forestry farm        | Mixed broadleaf-conifer forest | Y Zou         | 42° 14' 08" 77   | 128° 09' 52" 81   | 1040 |
| 5731 | 2017.9.16 | Changbai Mountain Nature Reserve | Mixed broadleaf-conifer forest | Y Zou         | 42° 10' 54" 73   | 128° 10' 54" 44   | 1136 |
| 5732 | 2017.9.16 | Changbai Mountain Nature Reserve | Mixed broadleaf-conifer forest | Y Zou         | 42° 05' 11" 04   | 128° 04' 27" 05   | 1595 |
| 5733 | 2017.9.16 | Changbai Mountain Nature Reserve | Moss under alpine birch forest | Y Zou         | 42° 03' 38" 63   | 128° 03' 38" 41   | 1743 |
| 5734 | 2017.9.16 | Changbai Mountain Nature Reserve | Mixed broadleaf-conifer forest | Y Zou         | 42° 04' 21" 52   | 128° 03' 53" 63   | 1700 |
| 5735 | 2017.9.16 | Changbai Mountain Nature Reserve | Mixed broadleaf-conifer forest | Y Zou         | 42° 04' 13" 76   | 128° 03' 56" 95   | 1720 |
| 5736 | 2017.9.16 | Changbai Mountain Nature Reserve | Mixed broadleaf-conifer forest | Y Zou         | 42° 04' 03" 34   | 128° 03' 59" 80   | 1790 |
| 5737 | 2017.9.16 | Changbai Mountain Nature Reserve | Alpine birch forest            | Y Zou         | 42° 04' 02" 38   | 128° 04' 02" 13   | 1817 |

---

|      |           |                                  |                                 |       |                |                 |      |
|------|-----------|----------------------------------|---------------------------------|-------|----------------|-----------------|------|
| 5738 | 2017.9.16 | Changbai Mountain Nature Reserve | Alpine birch forest             | Y Zou | 42° 04' 01" 27 | 128° 04' 03" 97 | 1824 |
| 5739 | 2017.9.16 | Changbai Mountain Nature Reserve | Alpine birch forest             | Y Zou | 42° 03' 59" 68 | 128° 04' 04" 96 | 1830 |
| 5740 | 2017.9.16 | Changbai Mountain Nature Reserve | Alpine birch forest             | Y Zou | 42° 02' 39" 99 | 128° 03' 29" 66 | 1858 |
| 5741 | 2017.9.16 | Changbai Mountain Nature Reserve | Tundra                          | Y Zou | 42° 01' 32" 62 | 128° 04' 08" 17 | 2615 |
| 5742 | 2017.9.16 | Changbai Mountain Nature Reserve | Tundra                          | Y Zou | 42° 01' 36" 98 | 128° 04' 03" 34 | 2620 |
| 5743 | 2017.9.16 | Changbai Mountain Nature Reserve | Tundra                          | Y Zou | 42° 01' 40" 06 | 128° 04' 00" 19 | 2625 |
| 5744 | 2017.9.16 | Changbai Mountain Nature Reserve | Tundra                          | Y Zou | 42° 01' 32" 40 | 128° 04' 07" 80 | 2626 |
| 5745 | 2017.9.16 | Changbai Mountain Nature Reserve | Tundra                          | Y Zou | 42° 01' 40" 29 | 128° 04' 01" 98 | 2619 |
| 5746 | 2017.9.16 | Changbai Mountain Nature Reserve | Tundra                          | Y Zou | 42° 01' 36" 51 | 128° 04' 03" 68 | 2636 |
| 5747 | 2017.9.16 | Changbai Mountain Nature Reserve | tundra under stone              | Y Zou | 42° 01' 34" 29 | 128° 04' 04" 45 | 2620 |
| 5748 | 2017.9.16 | Changbai Mountain Nature Reserve | Tundra                          | Y Zou | 42° 01' 40" 39 | 128° 04' 00" 31 | 2625 |
| 5749 | 2017.9.16 | Changbai Mountain Nature Reserve | Volcanics                       | Y Zou | 42° 01' 32" 35 | 128° 04' 07" 83 | 2626 |
| 5750 | 2017.9.17 | Hancongou                        | snail shell in broadleaf forest | Y Zou | 42° 24' 06" 93 | 128° 05' 52" 43 | 776  |
| 5751 | 2017.9.17 | Hancongou                        | Broadleaf forest                | Y Zou | 42° 24' 06" 93 | 128° 05' 52" 43 | 776  |
| 5752 | 2017.9.17 | Hancongou                        | Broadleaf forest                | Y Zou | 42° 24' 07" 72 | 128° 05' 52" 14 | 774  |
| 5753 | 2017.9.17 | Hancongou                        | Broadleaf forest                | Y Zou | 42° 24' 05" 65 | 128° 05' 52" 25 | 786  |
| 5754 | 2017.9.17 | Hancongou                        | Mixed broadleaf-conifer forest  | Y Zou | 42° 24' 11" 92 | 128° 05' 53" 34 | 787  |
| 5755 | 2017.9.17 | Hancongou                        | Mixed broadleaf-conifer forest  | Y Zou | 42° 24' 08" 40 | 128° 05' 51" 38 | 809  |
| 5756 | 2017.9.17 | Hancongou                        | Mixed broadleaf-conifer forest  | Y Zou | 42° 24' 06" 81 | 128° 05' 54" 86 | 768  |
| 5757 | 2017.9.18 | Changbai Mountain Nature Reserve | Coniferous forest               | Y Zou | 42° 06' 26" 88 | 128° 05' 38" 72 | 1430 |

---

---

|      |           |                                  |                     |       |                |                 |      |
|------|-----------|----------------------------------|---------------------|-------|----------------|-----------------|------|
| 5758 | 2017.9.18 | Changbai Mountain Nature Reserve | Coniferous forest   | Y Zou | 42° 06' 27" 41 | 128° 05' 37" 56 | 1403 |
| 5759 | 2017.9.18 | Changbai Mountain Nature Reserve | Coniferous forest   | Y Zou | 42° 06' 25" 54 | 128° 05' 34" 13 | 1438 |
| 5760 | 2017.9.18 | Changbai Mountain Nature Reserve | Alpine birch forest | Y Zou | 42° 03' 30" 74 | 128° 03' 29" 04 | 1759 |

---

**Table S2.** NCBI GenBank accession information for sequences of all dictyostelids and an outgroup (*Physarum polycephalum*) included in the SSU phylogenetic analysis. Newly generated sequences are indicated with asterisks.

| Taxon                                      | Isolate no./ Strain no.     | Accession no. | Gene |
|--------------------------------------------|-----------------------------|---------------|------|
| <i>Physarum polycephalum</i>               | CL                          | X13160.1      | SSU  |
| <i>Cavenderia fasciculata</i> *            | 5754-2wang-23 (HMJAU MR313) | MW660750      | SSU  |
| <i>C. fasciculata</i> *                    | 5259-1-23 (HMJAU MR313)     | MW660751      | SSU  |
| <i>C. basinodulosa</i>                     | Mad5-1A                     | MN338955.1    | SSU  |
| <i>C. canoespora</i>                       | Mad14-3C                    | MN338956.1    | SSU  |
| <i>C. protodigitata</i>                    | TH18BA                      | MH745572.1    | SSU  |
| <i>C. aureostabilis</i>                    | TH10B                       | MH745571.1    | SSU  |
| <i>C. multistipes</i>                      | UK26b                       | AM168070.1    | SSU  |
| <i>C. deminutiva</i>                       | MexM19A                     | AM168092.1    | SSU  |
| <i>C. stellata</i>                         | SAB7B                       | AM168081.1    | SSU  |
| <i>C. mexicana</i>                         | MexTF4B1                    | AM168089.1    | SSU  |
| <i>C. bifurcata</i>                        | UK5                         | AM168084.1    | SSU  |
| <i>C. granulophora</i>                     | CHII-4                      | AM168072.1    | SSU  |
| <i>C. medusoides</i>                       | OH592                       | AM168088.1    | SSU  |
| <i>C. aureostipes</i> var. <i>helvetia</i> | HM592                       | KF662214.1    | SSU  |
| <i>C. aureostipes</i>                      | YA6                         | AM168083.1    | SSU  |
| <i>C. myxobasis</i>                        | NT2A                        | HQ141522.1    | SSU  |
| <i>C. subdiscoidea</i>                     | TH1A                        | HQ141515.1    | SSU  |
| <i>C. aureostipes</i>                      | OH396                       | KF662201.1    | SSU  |
| <i>C. aureostipes</i>                      | B15A                        | KF662199.1    | SSU  |
| <i>C. pseudoaureostipes</i>                | TH39A                       | HQ141518.1    | SSU  |
| <i>C. sp.</i> TH18B                        | TH18B                       | HQ141517.1    | SSU  |
| <i>C. bhumiboliana</i>                     | THC11X                      | HQ141523.1    | SSU  |
| <i>C. fasciculata</i>                      | SH3                         | AM168087.1    | SSU  |
| <i>C. fasciculoidea</i>                    |                             | GQ496157.1    | SSU  |
| <i>C. delicata</i>                         | TNS-C-226                   | AM168093.1    | SSU  |
| <i>C. fasciculata</i>                      | SmokOW9A                    | AM168086.1    | SSU  |
| <i>C. sp.</i> TAS30A                       | TAS30A                      | HQ141516.1    | SSU  |

|                                |                         |            |     |
|--------------------------------|-------------------------|------------|-----|
| <i>C. antarctica</i>           | NZ43B                   | AM168080.1 | SSU |
| <i>C. macrocarpa</i>           | MGE2                    | HQ141519.1 | SSU |
| <i>C. parvispora</i>           | OS126                   | AM168091.1 | SSU |
| <i>C. amphispورا</i>           | BM9A                    | HQ141521.1 | SSU |
| <i>C. microspora</i>           | TNS-C-38                | AM168090.1 | SSU |
| <i>C. boomerangispora</i>      | K26B                    | HQ141520.1 | SSU |
| <i>C. exigua</i>               | TNS-C-199               | AM168085.1 | SSU |
| <i>Acytostelium amazonicum</i> | HN1B1                   | HQ141511.1 | SSU |
| <i>A. subglobosum</i>          | LB1                     | AM168110.1 | SSU |
| <i>A. magnisorum</i>           | 08A                     | HQ141513.1 | SSU |
| <i>A. amazonicum</i>           | landolt X               | HQ141510.1 | SSU |
| <i>A. leptosomum</i>           | 212rjb                  | HQ141512.1 | SSU |
| <i>A. serpentarium</i>         | SAB3A                   | AM168113.1 | SSU |
| <i>A. digitatum</i>            | OH517                   | AM168114.1 | SSU |
| <i>A. singulare</i>            | FDIB                    | HQ141514.1 | SSU |
| <i>A. longisorophorum</i>      | DB10A                   | AM168109.1 | SSU |
| <i>A. anastomosans</i>         | PP1                     | AM168115.1 | SSU |
| <i>A. leptosomum</i>           | FG12                    | AM168111.1 | SSU |
| <i>Roostelium ellipticum</i>   | AE2                     | AM168112.1 | SSU |
| <i>Heterostelium pallidum*</i> | 5759-1-23 (HMJAU MR314) | MW660748   | SSU |
| <i>H. pallidum*</i>            | 5759-2-23 (HMJAU MR314) | MW660749   | SSU |
| <i>H. recretum*</i>            | 5756-1-17 (HMJAU MR315) | MW857293   | SSU |
| <i>H. radiatum</i>             | M26B                    | MN338953.1 | SSU |
| <i>H. multibrachiatum</i>      | 5916lun                 | MN752217.1 | SSU |
| <i>H. multibrachiatum</i>      | 5904lun                 | MN752218.1 | SSU |
| <i>H. stolonicoideum</i>       | K12A                    | HQ141507.1 | SSU |
| <i>H. versatile</i>            | Mad52                   | MN338954.1 | SSU |
| <i>H. violaceotypum</i>        |                         | KP167478.1 | SSU |
| <i>H. pallidum</i>             | TNS-C-98                | AM168103.1 | SSU |
| <i>H. candidum</i>             | bsb6b                   | HQ141498.1 | SSU |
| <i>H. sp. TH12A</i>            | TH12A                   | HQ141504.1 | SSU |
| <i>H. candidum</i>             |                         | AY040337.1 | SSU |
| <i>H. filamentosum</i>         | SU-1                    | AM168100.1 | SSU |



|                                  |                   |            |     |
|----------------------------------|-------------------|------------|-----|
| <i>H. luridum</i>                | LR-2              | AM168101.1 | SSU |
| <i>H. lapidosum</i>              |                   | KP167477.1 | SSU |
| <i>H. pseudocolligatum</i>       |                   | KP167474.1 | SSU |
| <i>H. racemiferum</i>            |                   | KP167476.1 | SSU |
| <i>H. colligatum</i>             | OH538             | AM168098.1 | SSU |
| <i>H. tikalense</i>              | OH595             | AM168106.1 | SSU |
| <i>H. colligatum</i>             | HN13C1            | HQ141505.1 | SSU |
| <i>H. tikalense</i>              | HN1C1             | HQ141509.1 | SSU |
| <i>H. plurimicrocystogenum</i>   |                   | KP167475.1 | SSU |
| <i>H. pseudoplasmodiomagnum</i>  |                   | KP167472.1 | SSU |
| <i>H. unguiferum</i>             |                   | KP167473.1 | SSU |
| <i>H. australicum</i>            | NB1AP             | HQ141508.1 | SSU |
| <i>H. equisetoides</i>           | B7JB              | AM168099.1 | SSU |
| <i>H. arachnoideum</i>           | YA1               | AM168102.1 | SSU |
| <i>H. cumulocystum</i>           |                   | KP167479.1 | SSU |
| <i>H. ampliverticillatum</i>     |                   | KP167480.1 | SSU |
| <i>H. multicystogenum</i>        | AS2               | HQ141506.1 | SSU |
| <i>H. parvimigratum</i>          |                   | KP167483.1 | SSU |
| <i>H. pseudoplasmodiofascium</i> |                   | KP167482.1 | SSU |
| <i>H. migratissimum</i>          |                   | KP167481.1 | SSU |
| <i>H. anisocaula</i>             | NZ47B             | AM168096.1 | SSU |
| <i>H. pseudocandidum</i>         | TNS-C-91          | AM168107.1 | SSU |
| <i>H. asymmetricum</i>           | OH567             | AM168097.1 | SSU |
| <i>H. asymmetricum</i>           | HN20C             | HQ141503.1 | SSU |
| <i>H. sp. Laos3</i>              | Laos3             | HQ141496.1 | SSU |
| <i>H. pallidum</i>               | PN500             | AM168104.1 | SSU |
| <i>H. pallidum</i>               | PPHU8; ATCC 44421 | EU004605.1 | SSU |
| <i>H. tenuissimum</i>            | TNS-C-97          | AM168105.1 | SSU |
| <i>H. tenuissimum</i>            |                   | AY040339.1 | SSU |
| <i>H. gloeosporum</i>            | TCK52             | AM168074.1 | SSU |
| <i>H. granulosum</i>             | MF5A              | HQ141502.1 | SSU |
| <i>H. flexuosum</i>              | AU4B              | HQ141500.1 | SSU |
| <i>H. rotatum</i>                | QC2C              | HQ141501.1 | SSU |

|                                              |           |            |     |
|----------------------------------------------|-----------|------------|-----|
| <i>H. boreale</i>                            | BSB10A    | HQ141499.1 | SSU |
| <i>H. oculare</i>                            | oculare   | HQ141497.1 | SSU |
| <i>H. oculare</i>                            | DB4B      | AM168079.1 | SSU |
| <i>Speleostelium caveatum</i>                | WS695     | AM168077.1 | SSU |
| <i>Tieghemostelium menorah</i>               | M1        | AM168073.1 | SSU |
| <i>T. unicornutum</i>                        | OH599     | JF892725.1 | SSU |
| <i>T. lacteum</i>                            |           | AM168045.1 | SSU |
| <i>T. angelicum</i>                          | 38B0      | JF892716.1 | SSU |
| <i>T. montium</i>                            | 57a       | JF892717.1 | SSU |
| <i>T. dumosum</i>                            | OH602     | JF892722.1 | SSU |
| <i>T. simplex</i>                            | OH598     | JF892720.1 | SSU |
| <i>Hagiwaraea coeruleostipes</i>             | CRLC53B   | AM168036.1 | SSU |
| <i>Ha. rhizopodium</i>                       | AusKY-4   | AM168063.1 | SSU |
| <i>Ha. radiculata</i>                        | ML5A      | HQ141494.1 | SSU |
| <i>Ha. vinaceofusca</i>                      | CC4       | AM168062.1 | SSU |
| <i>Ha. lavandula</i>                         | B15       | AM168047.1 | SSU |
| <i>Raperostelium stabile</i>                 | M12A      | MN338957.1 | SSU |
| <i>R. minutum</i>                            | 71-2      | AM168051.1 | SSU |
| <i>R. ohioense</i>                           | Okla4C    | HQ141493.1 | SSU |
| <i>R. sp. TH14B</i>                          | TH14B     | HQ141491.1 | SSU |
| <i>R. gracile</i>                            | TNS-C-183 | AM168078.1 | SSU |
| <i>R. tenue</i>                              | PR4       | AM168075.1 | SSU |
| <i>R. tenue</i>                              | PJ6       | AM168094.1 | SSU |
| <i>R. filiforme</i>                          | OH603     | JF892724.1 | SSU |
| <i>R. capillare</i>                          | 37A       | JF892721.1 | SSU |
| <i>R. maeandriforme</i>                      | OH604     | JF892719.1 | SSU |
| <i>R. reciprocatum</i> var. <i>transitum</i> | OH601     | JF892723.1 | SSU |
| <i>R. tenue</i>                              | Pan52     | AM168076.1 | SSU |
| <i>R. reciprocatum</i>                       | 38A       | JF892718.1 | SSU |
| <i>R. australe</i>                           | NZ80B     | AM168029.1 | SSU |
| <i>R. sp. TH8C</i>                           | TH8C      | HQ141492.1 | SSU |
| <i>R. monochasioides</i>                     | HAG653    | AM168052.1 | SSU |
| <i>R. potamoides</i>                         | FP1A      | AM168069.1 | SSU |

|                                               |                               |            |                                                                                                                                                                                    |
|-----------------------------------------------|-------------------------------|------------|------------------------------------------------------------------------------------------------------------------------------------------------------------------------------------|
| <i>R. sp. MR-2008</i>                         |                               | EU672875.1 | SSU                                                                                                                                                                                |
| <i>R. ibericum</i>                            | 214rjb                        | HQ141495.1 | SSU                                                                                                                                                                                |
| <i>Coremiostelium polycephalum</i>            | Landolt #1675 GUAM            | HQ141490.1 | SSU                                                                                                                                                                                |
| <i>Co. polycephalum</i>                       | MY1-1                         | AM168056.1 | SSU                                                                                                                                                                                |
| <i>Co. polycephalum</i>                       | Landolt #1130 SS3B            | HQ141488.1 | SSU                                                                                                                                                                                |
| <i>Co. polycephalum</i>                       | Landolt #2132 B-9c            | HQ141489.1 | SSU                                                                                                                                                                                |
| <i>Polysphondylium fuscans</i>                | Sweden-11D                    | JX173877.1 | SSU                                                                                                                                                                                |
| <i>P. sp. Tibet 10A</i>                       | Tibet 10A                     | HQ141487.1 | SSU                                                                                                                                                                                |
| <i>P. laterosorum</i>                         | AE4                           | AM168046.1 | SSU                                                                                                                                                                                |
| <i>P. violaceum</i>                           | P6                            | AM168108.1 | SSU                                                                                                                                                                                |
| <i>P. sp. Laos4</i>                           | Laos4                         | HQ141485.1 | SSU                                                                                                                                                                                |
| <i>P. patagonicum</i>                         |                               | GQ496156.1 | SSU                                                                                                                                                                                |
| <i>P. violaceum</i>                           | 209                           | HQ141486.1 | SSU                                                                                                                                                                                |
| <i>Dictyostelium discoideum*</i>              | 5751-1-23 (HMJAU MR302)       | MT125951   | SSU                                                                                                                                                                                |
| <i>D. discoideum*</i>                         | 5752-3-17 (HMJAU MR302)       | MT125952   | SSU                                                                                                                                                                                |
| <i>D. mucoroides*</i>                         | 5035-23 (HMJAU MR303)         | MW660746   | SSU                                                                                                                                                                                |
| <i>D. mucoroides*</i>                         | 5735-3-23 (HMJAU MR303)       | MW660747   | SSU                                                                                                                                                                                |
| <i>D. robusticaule*</i>                       | 5729-huang-2021 (HMJAU MR305) | MW931856   | SSU                                                                                                                                                                                |
| <i>D. robusticaule*</i>                       | 5729-bai-2021 (HMJAU MR305)   | MW931857   | SSU                                                                                                                                                                                |
| <i>D. barbarae</i>                            | 1-5                           | MK322959.1 | SSU                                                                                                                                                                                |
| <i>D. insulinativitatis</i>                   |                               | MK322958.1 | SSU                                                                                                                                                                                |
| <i>D. multiforme</i>                          | 4009                          | MG490371.1 | SSU                                                                                                                                                                                |
| <i>D. multiforme</i>                          | 4007                          | MG490370.1 | SSU                                                                                                                                                                                |
| <i>D. minimum</i>                             |                               | MG490369.1 | SSU                                                                                                                                                                                |
| <i>D. gargantum</i>                           |                               | GQ496161.1 | SSU                                                                                                                                                                                |
| <i>D. robustum</i>                            | TNS-C-219                     | AM168064.1 | SSU                                                                                                                                                                                |
| <i>D. brunneum</i>                            | WS700                         | AM168031.1 | SSU                                                                                                                                                                                |
| <i>D. giganteum</i>                           | WS589                         | AM168042.1 | SSU                                                                                                                                                                                |
| <i>D. sp. Laos1</i>                           | Laos1                         | HQ141483.1 | SSU                                                                                                                                                                                |
| <i>D. purpureum</i> var. <i>pseudosessile</i> | MR273 (4446)                  | MH280023.1 | SSU                                                                                                                                                                                |
| <i>D. purpureum</i>                           | QSpu1                         | FJ424829.1 | 17S ribosomal RNA gene, internal transcribed spacer 1, 5.8S ribosomal RNA gene, and internal transcribed spacer 2, complete sequence; and 26S ribosomal RNA gene, partial sequence |
| <i>D. purpureum</i>                           | QSpu2                         | FJ424839.1 | 17S ribosomal RNA gene, partial sequence; internal transcribed spacer 1, 5.8S ribosomal RNA gene, and internal transcribed spacer 2, complete                                      |

|                              |             |            |                                                                                                                                                                                                      |
|------------------------------|-------------|------------|------------------------------------------------------------------------------------------------------------------------------------------------------------------------------------------------------|
|                              |             |            | sequence; and 26S ribosomal RNA gene, partial sequence                                                                                                                                               |
| <i>D. purpureum</i>          | QSpu23      | FJ424832.1 | 7S ribosomal RNA gene, internal transcribed spacer 1, 5.8S ribosomal RNA gene, internal transcribed spacer 2, and 26S ribosomal RNA gene, complete sequence                                          |
| <i>D. purpureum</i>          | QSpu28      | FJ424836.1 | 17S ribosomal RNA gene, internal transcribed spacer 1, 5.8S ribosomal RNA gene, and internal transcribed spacer 2, complete sequence; and 26S ribosomal RNA gene, partial sequence                   |
| <i>D. purpureum</i>          |             | DQ340386.1 | 17S ribosomal RNA, 5.8S ribosomal RNA, 26S ribosomal RNA, and 5S ribosomal RNA genes, complete sequence                                                                                              |
| <i>D. purpureum</i>          | QSpu4       | FJ424826.1 | 17S ribosomal RNA gene, partial sequence; internal transcribed spacer 1, 5.8S ribosomal RNA gene, and internal transcribed spacer 2, complete sequence; and 26S ribosomal RNA gene, partial sequence |
| <i>D. purpureum</i>          |             | AY040335.1 | SSU                                                                                                                                                                                                  |
| <i>D. purpureum</i>          | QSpu36      | FJ424828.1 | 17S ribosomal RNA gene, internal transcribed spacer 1, 5.8S ribosomal RNA gene, and internal transcribed spacer 2, complete sequence; and 26S ribosomal RNA gene, partial sequence                   |
| <i>D. purpureum</i>          | WS321       | AM168061.1 | SSU                                                                                                                                                                                                  |
| <i>D. purpureum</i>          | cavender    | HQ141481.1 | SSU                                                                                                                                                                                                  |
| <i>D. septentrionale</i>     | IY49        | AM168066.1 | SSU                                                                                                                                                                                                  |
| <i>D. septentrionale</i>     | AK2         | AM168067.1 | SSU                                                                                                                                                                                                  |
| <i>D. purpureum</i>          | C143        | AM168060.1 | SSU                                                                                                                                                                                                  |
| <i>D. discoideum</i>         | NC4         | AM168071.1 | SSU                                                                                                                                                                                                  |
| <i>D. dimigraformum</i>      | AR5b        | AM168038.1 | SSU                                                                                                                                                                                                  |
| <i>D. citrinum</i>           | OH494       | AM168033.1 | SSU                                                                                                                                                                                                  |
| <i>D. discoideum</i>         | V34         | AM168039.1 | SSU                                                                                                                                                                                                  |
| <i>D. firmibasis</i>         | TNS-C-14    | AM168041.1 | SSU                                                                                                                                                                                                  |
| <i>D. intermedium</i>        | PJ11        | AM168044.1 | SSU                                                                                                                                                                                                  |
| <i>D. sp. Laos5</i>          | Laos5       | HQ141484.1 | SSU                                                                                                                                                                                                  |
| <i>D. crassicaule</i>        | 93HO-33     | AM168037.1 | SSU                                                                                                                                                                                                  |
| <i>D. aureocephalum</i>      | TNS-C-180   | AM167876.1 | SSU                                                                                                                                                                                                  |
| <i>D. aureum</i>             | SL1         | AM168028.1 | SSU                                                                                                                                                                                                  |
| <i>D. leptosomum</i>         | NZN49A      | HQ141480.1 | SSU                                                                                                                                                                                                  |
| <i>D. capitatum</i>          | 91HO-50     | AM168032.1 | SSU                                                                                                                                                                                                  |
| <i>D. pseudobrefeldianum</i> | 91HO-8      | AM168059.1 | SSU                                                                                                                                                                                                  |
| <i>D. austroandinum</i>      |             | GQ496158.1 | SSU                                                                                                                                                                                                  |
| <i>D. leptosomopsis</i>      | Araucaria 1 | HM159992.1 | SSU                                                                                                                                                                                                  |
| <i>D. mucoroides</i>         | S28b        | AM168054.1 | SSU                                                                                                                                                                                                  |
| <i>D. brefeldianum</i>       | TNS-C-115   | AM168030.1 | SSU                                                                                                                                                                                                  |

|                                               |           |            |     |
|-----------------------------------------------|-----------|------------|-----|
| <i>D. mucoroides</i>                          | sweden 20 | HQ141482.1 | SSU |
| <i>D. macrocephalum</i>                       | B33       | AM168049.1 | SSU |
| <i>D. medium</i>                              | TNS-C-205 | AM168050.1 | SSU |
| <i>D. mucoroides</i> var. <i>stoloniferum</i> | FOII-1    | AM168055.1 | SSU |
| <i>D. rosarium</i>                            | M45       | AM168065.1 | SSU |
| <i>D. sphaerocephalum</i>                     | GR11      | AM168068.1 | SSU |
| <i>D. mucoroides</i>                          | TNS-C-114 | AM168053.1 | SSU |
| <i>D. quercibrachium</i>                      | NZ201B    | HQ141479.1 | SSU |
| <i>D. clavatum</i>                            | TNS-C-189 | AM168034.1 | SSU |
| <i>D. clavatum</i>                            | TNS-C-220 | AM168035.1 | SSU |
| <i>D. longosporum</i>                         | TNS-C-109 | AM168048.1 | SSU |
| <i>D. ammophilum</i>                          | KBK4A     | HQ141478.1 | SSU |
| <i>D. valdivianum</i>                         |           | GQ496155.1 | SSU |
| <i>D. implicatum</i>                          | 93HO-1    | AM168043.1 | SSU |
| <i>D. chordatum</i>                           |           | GQ496159.1 | SSU |
| <i>D. barbibus</i>                            | Sweden-4R | JX173878.1 | SSU |
| <i>Synstelium polycarpum</i>                  | VE1b      | AM168057.1 | SSU |
| <i>S. polycarpum</i>                          | OhioWILDS | AM168058.1 | SSU |

---

**Table S3.** NCBI GenBank accession information for sequences of all dictyostelids and an outgroup (*Physarum polycephalum*) included in the *atp1* phylogenetic analysis. Newly generated sequences are indicated with asterisks.

| Taxon                                      | Isolate no./ Strain no.       | Accession no. | Gene                                 |
|--------------------------------------------|-------------------------------|---------------|--------------------------------------|
| <i>Physarum polycephalum</i>               |                               | NC_002508.1   | mitochondrion, complete genome       |
| <i>Dictyostelium discoideum</i> *          | 5751-1-23 (HMJAU MR302)       | MZ318395      | <i>atp1</i>                          |
| <i>D. discoideum</i> *                     | 5752-3-17 (HMJAU MR302)       | MZ318394      | <i>atp1</i>                          |
| <i>D. mucoroides</i> *                     | 5735-3-23 (HMJAU MR303)       | MZ318393      | <i>atp1</i>                          |
| <i>D. robusticaule</i> *                   | 5729-huang-2021 (HMJAU MR305) | MZ318392      | <i>atp1</i>                          |
| <i>D. robusticaule</i> *                   | 5729-bai-2021 (HMJAU MR305)   | MZ318391      | <i>atp1</i>                          |
| <i>D. sp.</i> TAS30A                       | TAS30A                        | KF662068.1    | <i>atp1</i>                          |
| <i>D. discoideum</i>                       | AX3                           | AB000109.1    | mitochondrial DNA, complete genome   |
| <i>D. citrinum</i>                         |                               | DQ336395.4    | mitochondrion, complete genome       |
| <i>Heterostelium pallidum</i> *            | 5759-1-23 (HMJAU MR314)       | MZ318388      | <i>atp1</i>                          |
| <i>H. pallidum</i> *                       | 5759-2-23 (HMJAU MR314)       | MZ318387      | <i>atp1</i>                          |
| <i>H. recretum</i> *                       | 5756-1-17 (HMJAU MR315)       | MZ318386      | <i>atp1</i>                          |
| <i>H. pallidum</i>                         | CK8                           | AY700145.1    | mitochondrion DNA, complete sequence |
| <i>H. pallidum</i>                         | PN500                         | EU275726.1    | mitochondrion, complete genome       |
| <i>Cavenderia fasciculata</i> *            | 5754-2wang-23 (HMJAU MR313)   | MZ318390      | <i>atp1</i>                          |
| <i>C. fasciculata</i> *                    | 5259-1-23 (HMJAU MR313)       | MZ318389      | <i>atp1</i>                          |
| <i>C. granulophora</i>                     | CH11-4                        | KF662075.1    | <i>atp1</i>                          |
| <i>C. sp.</i> TH18D                        | TH18D                         | KF662113.1    | <i>atp1</i>                          |
| <i>C. aureostipes</i>                      | AU7B                          | KF662112.1    | <i>atp1</i>                          |
| <i>C. sp.</i> TH1A                         | TH1A                          | KF662123.1    | <i>atp1</i>                          |
| <i>C. aureostipes</i>                      | B15A                          | KF662116.1    | <i>atp1</i>                          |
| <i>C. sp.</i> TH39A                        | TH39A                         | KF662117.1    | <i>atp1</i>                          |
| <i>C. myxobasis</i>                        | NT2A                          | KF662122.1    | <i>atp1</i>                          |
| <i>C. aureostipes</i>                      | Thai2C1                       | KF662118.1    | <i>atp1</i>                          |
| <i>C. stellata</i>                         | SAB7B                         | KF662110.1    | <i>atp1</i>                          |
| <i>C. aureostipes</i>                      | OH396                         | KF662120.1    | <i>atp1</i>                          |
| <i>C. aureostipes</i> var. <i>helvetia</i> | HM594                         | KF662109.1    | <i>atp1</i>                          |

|                                            |             |            |                                |
|--------------------------------------------|-------------|------------|--------------------------------|
| <i>C. aureostipes</i> var. <i>helvetia</i> | 52A1        | KF662100.1 | <i>atp1</i>                    |
| <i>C. aureostipes</i> var. <i>helvetia</i> | HM593       | KF662099.1 | <i>atp1</i>                    |
| <i>C. aureostipes</i>                      | CR6B1       | KF662115.1 | <i>atp1</i>                    |
| <i>C. bifurcata</i>                        | UK5         | KF662111.1 | <i>atp1</i>                    |
| <i>C. fasciculata</i>                      | SH3         | EU275727.1 | mitochondrion, complete genome |
| <i>C. aureostipes</i>                      | KAL7A       | KF662084.1 | <i>atp1</i>                    |
| <i>C. aureostipes</i>                      | Chile10B1   | KF662082.1 | <i>atp1</i>                    |
| <i>C. aureostipes</i>                      | GSE7B       | KF662083.1 | <i>atp1</i>                    |
| <i>C. mexicana</i>                         | TF4B1       | KF662073.1 | <i>atp1</i>                    |
| <i>C. delicata</i>                         | TNS 266     | KF662080.1 | <i>atp1</i>                    |
| <i>C. aureostipes</i>                      | BP7B        | KF662127.1 | <i>atp1</i>                    |
| <i>C. aureostipes</i>                      | Got5B4      | KF662094.1 | <i>atp1</i>                    |
| <i>C. antarctica</i>                       | NZ43B       | KF662081.1 | <i>atp1</i>                    |
| <i>C. aureostipes</i>                      | LR2         | KF662124.1 | <i>atp1</i>                    |
| <i>C. aureostipes</i>                      | AKL43C      | KF662095.1 | <i>atp1</i>                    |
| <i>C. aureostipes</i>                      | KP3         | KF662130.1 | <i>atp1</i>                    |
| <i>C. aureostipes</i>                      | Got9A1      | KF662092.1 | <i>atp1</i>                    |
| <i>C. fasciculata</i>                      | HM595       | KF662076.1 | <i>atp1</i>                    |
| <i>C. aureostipes</i>                      | I3          | KF662133.1 | <i>atp1</i>                    |
| <i>C. aureostipes</i>                      | OH110 BW6   | KF662131.1 | <i>atp1</i>                    |
| <i>C. fasciculata</i>                      | Nor84E      | KF662077.1 | <i>atp1</i>                    |
| <i>C. aureostipes</i>                      | OH438       | KF662088.1 | <i>atp1</i>                    |
| <i>C. medusoides</i>                       | OH592       | KF662074.1 | <i>atp1</i>                    |
| <i>C. aureostipes</i> var. <i>helvetia</i> | HM592       | KF662098.1 | <i>atp1</i>                    |
| <i>C. exigua</i>                           | KP94        | KF662096.1 | <i>atp1</i>                    |
| <i>C. parvispora</i>                       | OS126       | KF662071.1 | <i>atp1</i>                    |
| <i>C. microspora</i>                       | Hagiwara143 | KF662072.1 | <i>atp1</i>                    |

---

**Table S4.** Dictyostelids have been reported in Taiwan and on Changbai Mountain.

| Order           | Family           | Genus                  | Taiwan                                                   | References              | Changbai Mountain      | References        |
|-----------------|------------------|------------------------|----------------------------------------------------------|-------------------------|------------------------|-------------------|
| Dictyosteliales | Dictyosteliaceae | <i>Dictyostelium</i>   | <i>Dictyostelium aureostipes</i> var. <i>aureostipes</i> | Hagiwara et al. 1992(1) |                        |                   |
| Dictyosteliales | Dictyosteliaceae | <i>Dictyostelium</i>   | <i>D. brefeldianum</i>                                   | Yeh & Chien 1983(2)     |                        |                   |
| Dictyosteliales | Dictyosteliaceae | <i>Dictyostelium</i>   | <i>D. clavatum</i>                                       | Fan et al. 2002(3)      |                        |                   |
| Dictyosteliales | Dictyosteliaceae | <i>Dictyostelium</i>   |                                                          |                         | <i>D. discoideum</i>   | This paper        |
| Dictyosteliales | Dictyosteliaceae | <i>Dictyostelium</i>   |                                                          |                         | <i>D. firmibasis</i>   | An et al. 2018(4) |
| Dictyosteliales | Dictyosteliaceae | <i>Dictyostelium</i>   | <i>D. giganteum</i>                                      | Yeh & Chien 1983(2)     |                        |                   |
| Dictyosteliales | Dictyosteliaceae | <i>Dictyostelium</i>   | <i>D. macrocephalum</i>                                  | Hagiwara et al. 1985(5) |                        |                   |
| Dictyosteliales | Dictyosteliaceae | <i>Dictyostelium</i>   | <i>D. magnum</i>                                         | Hagiwara et al. 1992(1) |                        |                   |
| Dictyosteliales | Dictyosteliaceae | <i>Dictyostelium</i>   |                                                          |                         | <i>D. mucoroides</i>   | This paper        |
| Dictyosteliales | Dictyosteliaceae | <i>Dictyostelium</i>   | <i>D. purpureum</i>                                      | Hagiwara et al. 1992(1) |                        |                   |
| Dictyosteliales | Dictyosteliaceae | <i>Dictyostelium</i>   |                                                          |                         | <i>D. robusticaule</i> | This paper        |
| Dictyosteliales | Dictyosteliaceae | <i>Polysphondylium</i> | <i>Polysphondylium violaceum</i>                         | Yeh & Chien 1983(2)     | <i>P. violaceum</i>    | Liu & Li 2014(6)  |
| Dictyosteliales |                  | <i>Coremiostelium</i>  | <i>Coremiostelium polycephalum</i>                       | Hagiwara et al. 1992(1) |                        |                   |
| Dictyosteliales | Raperosteliaceae | <i>Raperostelium</i>   | <i>Raperostelium minutum</i>                             | Yeh 2003(7)             |                        |                   |
| Dictyosteliales | Raperosteliaceae | <i>Raperostelium</i>   | <i>R. monochasioides</i>                                 | Hagiwara et al. 1992(1) |                        |                   |
| Dictyosteliales | Raperosteliaceae | <i>Hagiwaraea</i>      | <i>Hagiwaraea coeruleostipes</i>                         | Fan & Yeh 2001(8)       |                        |                   |
| Dictyosteliales | Raperosteliaceae | <i>Hagiwaraea</i>      | <i>Ha. lavandula</i>                                     | Hagiwara et al. 1992(1) |                        |                   |
| Dictyosteliales | Raperosteliaceae | <i>Hagiwaraea</i>      | <i>Ha. rhizopodium</i>                                   | Hagiwara et al. 1992(1) |                        |                   |
| Acytosteliales  | Acytosteliaceae  | <i>Heterostelium</i>   | <i>Heterostelium arachnoideum</i>                        | Liu et al. 2019(9)      |                        |                   |
| Acytosteliales  | Acytosteliaceae  | <i>Heterostelium</i>   |                                                          |                         | <i>H. candidum</i>     | He & Li 2008(10)  |
| Acytosteliales  | Acytosteliaceae  | <i>Heterostelium</i>   | <i>H. pallidum</i>                                       | Yeh & Chien 1983(2)     | <i>H. pallidum</i>     | This paper        |
| Acytosteliales  | Acytosteliaceae  | <i>Heterostelium</i>   | <i>H. pseudocandidum</i>                                 | Lin & Yeh 1999(11)      |                        |                   |
| Acytosteliales  | Acytosteliaceae  | <i>Heterostelium</i>   |                                                          |                         | <i>H. recretum</i>     | This paper        |
| Acytosteliales  | Acytosteliaceae  | <i>Acytostelium</i>    | <i>Acytostelium leptosomum</i>                           | Hagiwara et al. 1992(1) |                        |                   |
| Acytosteliales  | Cavenderiaceae   | <i>Cavenderia</i>      | <i>Cavenderia delicata</i>                               | Hsu et al. 2001(12)     |                        |                   |
| Acytosteliales  | Cavenderiaceae   | <i>Cavenderia</i>      | <i>C. exigua</i>                                         | Yeh & Chen 2004(13)     |                        |                   |
| Acytosteliales  | Cavenderiaceae   | <i>Cavenderia</i>      |                                                          |                         | <i>C. fasciculata</i>  | This paper        |



**Table S5.** Dictyostelids have been reported with habitat on Changbai Mountain.

| Changbai Mountain                | References        | Habitat                        |
|----------------------------------|-------------------|--------------------------------|
| <i>Dictyostelium discoideum</i>  | This paper        | Broadleaf forest               |
| <i>D. firmibasis</i>             | An et al. 2018(4) | Mixed broadleaf-conifer forest |
| <i>D. mucoroides</i>             | This paper        | Tundra                         |
| <i>D. mucoroides</i>             | This paper        | Mixed broadleaf-conifer forest |
| <i>D. robusticaule</i>           | This paper        | Mixed broadleaf-conifer forest |
| <i>Polysphondylium violaceum</i> | Liu & Li 2014(6)  | Mixed broadleaf-conifer forest |
| <i>Heterostelium candidum</i>    | He & Li 2008a(10) | Forest                         |
| <i>H. pallidum</i>               | This paper        | Coniferous forest              |
| <i>H. recretum</i>               | This paper        | Mixed broadleaf-conifer forest |
| <i>Cavenderia fasciculata</i>    | This paper        | Mixed broadleaf-conifer forest |
| <i>C. fasciculata</i>            | This paper        | Coniferous forest              |

Text S1. Alignment of SSU sequences

>MN338956.1\_Cavenderia\_canoespora\_Mad14\_3C  
-----TATAAGTCTCTTG-TACGGCTA-GA---CTGCAGACGGCTCATT--ACAA--CG  
GTTGT-----AT---CTTACAGGGCATCCGG-GTCGCA---AGACCTTCT-GGATAACCG  
CAGTAAATCGGGGCTAATACATATAAAA-CGGAGGGATGGAGAGGGC----AACCTGAAG  
TTTCTGCGATGGACATTTA-GCTATTC--GA-CCAACCC--CG-CAA-GGGAACG--GTT  
GGAACCGGTTTCATATTGCTAATCGACT-CTAGCTTGTAGTAGTCTGATGAGCTCTATAG  
ACAACCGCCCTATCAACTT--GATGGTAAGGTTTTGGCTTACCATGGTTGTAACGGGTAA  
CGGGGAATCAGGGTTCGATTCCGGAGAGGACGCCTGAGAAACGGCGTCCACATCTACGGG  
TGGCAGCAGGCGCGTAAATT-GCCCAATCTCAACAGAGAGGAGGCGGTGACAATAAATCC  
CGATGGCTTTGGGGCAACCCAGG--CCAATCAGAATAAGTACACATTAATCCCTTAA  
CC-AATATAATTGGAGGGCAAGTCTGGTGCCAGCAGCCGCGTAAATCCAGTCCAA-TA  
GCATATACTAATGTTGTTGAGTTAAAA-CGC-TCGTAGCT----GAATATCTTTT--G  
AG-CTAC-----TATCGACT-ACAT-TCC----TTCAA-A-G----GTCGCAAGACT-GA  
----TGAAGA--TGT-GGT-CGGCTCAAACAC-TGTAGGTGATGATA-TTGG----TAG  
CAATA-CTAAT--AT-----CATAA---TCGACTGTGCATAAAA-CCTTGATGCT  
CAAGGTA--GG-CCT-TT---ATAGGGTAGATACACAGT-GCATGGCATTGTGGAACAAG  
GCAT--CTCGCGCTTAGTTGGT-GGGCC-----GCGGGGCAATGATTAATAGGGAG  
GAGCGGGGCTTCATATTGCAGGGCGAGAGGTGAAATTCGTTGACCCTTGCAAGATGTC  
CGACAGCGAAAGCATTGGCCAAGTGCCTCTCCATTAGTCAAGAACGAAAGTTTGGGGATC  
AAAGACGATCAGATACCGTCTGATGCCAAACCATAAACTATGTCGACCAGCGATTAGGCG  
GGCTACCTTCTTCGAGAGCTGCCTAGCAGCTT-GTGGGAAACCAT-GAGTGCTTGGACTC  
TGGGGGGAGTATGGTTCGCAAGGCTGAAACTTAAAGGAATTGACGGAAGGGCACACCATGG  
AGTGGAG-CCTGCGGCTTAATTT-GACTCAACACGGGAAA-GCTTACCAAGCTCAGATAT  
GATAAGGATTGACAGA-CTAA-AAGATCTTTCATGATCTCATAAGTGGTGGTGCATGGTC  
GTTCTTAG-TTGGTGGAGTGATTTGTGAGGTCATTTCCGGTAACGGACGAGACCTCGACC  
TGCTAACTAGTGGGATTCATTCTTTCG--ATTGACGAGGCGGTATTGC-TTTGATTATG  
A-----GGGGCAACCTT----TATAGTCGGG-TAATATTTGTAG-TAGTCTGGAGGAG  
TGG--GTTTCAGACAATTTAATT--AATCTTCCTAGAGTACTTCTG-GCTCTAAGCCA  
GAGG-AAGTCCGAGGCAATAACAGGTCTGTGATGCCCTTAGATATCTT-GGGCCGCACGC  
GTGCTACAATGTAGGCGCTAATGAGTTCG--TAACAATTTCC--AGCTCCGT-AAG--GA  
GTCTGGTAATC-TTGAATCACCTGCGGTGATTGGGCTTG-ACTACTGTAACGTG-GGTCA  
TCAACGAGGAATTCCTGTATGCGCGAGTCACTATCTCGCGCAGAATCTGTCCCTGCCCT  
TTGTACACACCGCCGCTCCTACCGATCGAACGATCAGGTAAGTGGACAGATTA--  
-----GGA-ACCG-C-AAG-G-AT-C-----TT-TAG--AAGT-CC-  
A-----  
>MN338955.1\_Cavenderia\_basinodulosa\_Mad5\_1A  
TCTAAG-T--AAGCTCTTGCTACTGTTATGA---CTGCAGACGGCTCATT--ATCATATC  
TGTGTATGT-AT---CTTACAGGGCATCCGG-GTCGCA---AGACCTTCT-GGATAACCG  
CAGTAAATCGGGGCTAATACATATAAAA-CGGAGGGATGGAGAGGGC----TACCTGAAG  
TTTCTGCGATGGACATTTA-GCTATTC--GA-CCTCCCC--CG-CAA-GGGAACG--GTT  
GGAACCGGTTTCATATTGCTAATCGACT-CTAGCTTGTAGTTTTCTGATGAGCTCTATAG  
ACAACCGCCCTATCAACTT--GATGGTAAGGTTTTGGCTTACCTGGTTGTATCGGGTAA  
CGGGGAATCAGGGTTCGATTCCGGAGAGGACGCCTGACAAACGGCGTCCACATCTACGGG  
TGGCAGCAGGCGCGTAAATT-GCCCAATCTCAACAGAGAGGAGGCGGTGACAATAAATCC  
CGATGGCTTTGGGGCAACCCAGG--CCAATCAGAATAAGTACACATTAATCCCTTAA  
CC-AATATAATTGGAGGGCAAGTCTGGTGCCAGCAGCCGCGTAAATCCAGTCCAA-TA  
GCATATACTAATGTTGTTGAGTTAAAA-CGC-TCGTAGCT----GAATATCTTTT--G  
AG-CTAC-----TATCGACT-ACAT-TCC----TTCAA-A-G----GTCGCAAGACT-GA  
----TGAAGA--TGT-GGT-CGGCTCAAACAC-TGTAGGTGATGATA-TTGG----TAG  
CAATA-CTAAT--AT-----CATAA---TCGACTGTGCATAAAA-CCTTGATGCT  
CAAGGTA--GG-CCT-TT---ATAGGGTAGATACACAGT-GCATGGCATTGTGGAACAAG  
GCAT--CTCGCGCTTAGTTGGT-GGGCC-----GCGGGGCAATGATTAATAGGGAG  
GAGCGGGGCTTCATATTGCAGGGCGAGAGGTGAAATTCGTTGACCCTTGCAAGATGTC  
CGACAGCGAAAGCATTGGCCAAGTGCCTCTCCATTAGTCAAGAACGAAAGTTTGGGGATC  
AAAGACGATCAGATACCGTCTGATGCCAAACCATAAACTATGTCGACCAGCGATTAGGCG  
GGCTACCTTCTTCGAGAGCTGCCTAGCAGCTT-GTGGGAAACCAT-GAGTGCTTGGACTC  
TGGGGGGAGTATGGTTCGCAAGGCTGAAACTTAAAGGAATTGACGGAAGGGCACACCATGG  
AGTGGAG-CCTGCGGCTTAATTT-GACTCAACACGGGAAA-GCTTACCAAGCTCAGATAT  
GATAAGGATTGACAGA-CTAA-AAGATCTTTCATGATCTCATAAGTGGTGGTGCATGGTC  
GTTCTTAG-TTGGTGGAGTGATTTGTGAGGTCATTTCCGGTAACGGACGAGACCTCGACC  
TGCTAACTAGTGGGATTCATTCTTTCG--ATTGACGAGGCGGTATTGC-TTTGATTATG  
A-----GGGGCAACCTT----TATAGTCGGG-TAATATTTGTAG-TAGTCTGGAGGAG  
TGG--GTTTCAGACAATTTAATT--AATCTTCCTAGAGTACTTCTG-GCTCTAAGCCA  
GAGG-AAGTCCGAGGCAATAACAGGTCTGTGATGCCCTTAGATATCTT-GGGCCGCACGC  
GTGCTACAATGTAGGCGCTAATGAGTTCG--TAACAATTTCC--AGCTCCGT-AAG--GA  
GTCTGGTAATC-TTGAATCACCTGCGGTGATTGGGCTTG-ACTACTGTAACGTG-GGTCA  
TCAACGAGGAATTCCTGTATGCGCGAGTCACTATCTCGCGCAGAATCTGTCCCTGCCCT  
TTGTACACACCGCCGCTCCTACCGATCGAACGATCAGGTAAGTGGACA--TT---  
-----G-ATACCCTC-CGC---A-G-AGTC--C--TC-CCG--ATGT-AA-

T-A-CGGTTAT--A----A-----TT-  
>AM168092.1\_Cavenderia\_deminutiva\_MexM19A  
TCTAAG-TATAAGTCCTTG-TACGACTA-GA---CTGCAGACGGCTCATT--ACAA--CA  
GTTGT----TG---TCTACAGGACATCCGC-G-CTTT---TG-CGTTTT-GGATAACCG  
CAGTAAATCGGGGCTAATACATATAAA-CGAAGGAAT-GACTGG-T----AAC--GGAAG  
TTTCTCGATGGA--TTTA-GCTATTC--AA-CCGGCCT--TG-T----GTTT---GTT  
GGAACCGATCCATATTGCTAATCGGCTATTAGTTTACTAATAGCCTGATGAGTTCTATGA  
ACAACCTGCCCTATCAACTT--GATGGTAAGGTATTGGCTTACCATGGTTGTAACGGGTAA  
CGGGGAATCAGGGTTCGATTCCGGAGAGGACGCCTGAGAAACGGCGTCCACATCTACGGG  
TGGCAGCAGGCGCTAAAT-ACCCAATCTCAATAGAGAGGAGGTGGCGACAATAAATCC  
TGATGCCTATAGGCTCACGCCTAGG--GCAATTAGAATAAGTACAAAATAAATCCATTAA  
CC-AATGTAATTGGAGGGCAAGTCTGGTGCCAGCAGCCGCGGTAATTCCAGCTCCAA-TA  
GCTATACTAATGTTGTTGCAAGTAAAA-CGC-TCGTAGCT-----TA-----A  
AA-ACAC-----GGATCATT-TTTT-AGCTAAATCGATT-G----CCACCTGGA-AAACA  
--GGTGAGGTGATT-ATT-TGGCAT-GGCACGTGCTGGT--TGGGT-TTGGT--GT-T  
CGCT--CTAGCA-AG-----CTTAG---TCAACTGTGCATAAA-CCTTGATGCT  
CAAGGTAAAGA-CCG-TAGGTCT--GT--GATACTAAGT-GCATGGTATTGTAGAACATG  
GTAA--CAGGTGGCTTGTGGTTGGGTC-----ACTAGTGCAATGATTAATAGGGAG  
GAGCGGGGCTTCATATTGATGGGCGAGAGGTGAAATTCGTTGACCCTATCAAGATGTC  
CTACAGCGAAAGCATTTGCCAAGTGCCCTCCATTAGTCAAGAACGATAGTTTGGGGATC  
AAAGACGATCAGATACCGTCGTAGTCCAAACCATAAACGATGTCGACCAGTGATTAGGCA  
CGTCACCTTTCTAGAGAATGCCTAGGAACCTAGTGGGAAACCATTGAGTTTTTGGACTC  
TGGGGGAGTATGGTCGAAGGCTGAACTTAAAGGAATTGACGGAAGGGCACACCATGTC  
AGTGGAG-CCTGCGGCTTAATT--GACTCAACACGGGAAA-ACTTACCAAGCTCTGATAT  
GATAAGGATTGACAGA-CTAA-AAGATCTTTCATGATCGCATAAGTGGTGGTGCATGGTC  
GTTCTTAG-TTGGTGGAGTGATTTGTGAGGTCAATTCCGGTAAACGACGAGACCTCGACC  
TGCTAACTAGTGACAATTAGATTGTCGT-ATGGGCGAAGTTAGTTCGGCAGCTACTTAAT  
G-----GGCAACTG--TA--GGTAGTTGACGTATTGATTGTAG----CCTGGCAATG  
TAG--TTGTTATA---TT---TT-----CCTTCTTAGAGGGACTTCCA-GCTTTAAGTTG  
GAGG-AAGTCCGAGGCAATAACAGGTCTGTGATGCCCTTAGATATCTT-GGGCCGCACGC  
GTGCTACAATGTAGGCGCTAAT-AGGC----ATTT-TACCC---TTTACCT-AGA---GG  
TAGAGGTAACC-TA-CAATCCCCTACGTGATGGGATTG-ACCACTGTAAGTGT-GGTCA  
TCAACGAGGAATTCCTTGTAGGCGTGCCTACTATCGCACGCCGAATCTGTCCCTGCCCT  
CTGTACACACCGCCGTCGCTCCTACCGATCGAACGTCCAGGTAAGTTCGACGGACT---  
-----GTC-TTCG---AA--AGTTG-----AT-AGA--AAGT-CC-  
A-T-TGAACCT--C----GTC--GTTT

>AM168070.1\_Cavenderia\_multistipes\_UK26b  
TCTAAG-TATA-G-TCCTC--ACGGACGAAA---CTGCAGACGGCTCATT--ACAA--CG  
GTCGC-----TG---GTCACAGGACACGCGGGCGGGCA---ACTCGCTGT-GGATAACCG  
CATTAAATCGGGGCTAATACATACAAAACCGAGTGGACGACTGGGC----AAC-TGGAAG  
TTCGCGCATGGA--TTAA-CCC-TTC--GA-CTGACCT--CT-T----GTTTG--GTT  
GGAACCGATTATGTTGTTAGTCGGC-----GCTT-C--GGCGCC-GATTTGTTCTAGAC  
GCGACTGCCCTATCAGCTT--GACGGCAAGGTCTTGGCTTGCCGTGGCTGTAACGGGTAA  
CGGAGAATTAGGGTTCGATTCCGGAGAGGACGCCTGAGAAACGGCGTCCACACCTACGGG  
TGGGAGCAGGCACGTAAT-TCCTCAATGTCAATAC-GATGAGGGAGCGACAATAAATAC  
TTTTAGTCTGGTTCGAAGATCAGGACTCAACAAGATTAAGCACAAAAGTAAATAAATTAG  
CC-AGTATTATTGGAGGGCAAGTCTGGTGCCAGCAGCCGCGGTAATTCCAGCTCCAA-CA  
GTATATACTAAAAGTTGTTGCAAGTAAAA-CGT-TCGTAGCT-----TA-----  
----A-----ATACAGGTCTGTG---TAA-TTGCTT-G---TCACGTCTGTTTCGC-  
--GG-----CGT-GAC-AAGCGCAGGCGC-GGTAGATTGTGATGCTAG-----TCG  
GCAAC-GGCTA--GG-----CGCGGCTTCAACTGTGCATAAA-TCTTGATGCT  
CAAGGTG--AGTCC--AGGCGT-GGACGGGAAAAACAGT-GCATGGTATTGTAGAAGAAG  
ACGTG-GCAACGTCTAGTTGGT-TGGTT-----GTCCAGGTAATGATTAATAGGGAG  
GAGCGGGGCTGCTGATTGACGGGCGAGAGGTGAAATTCGTTGACCCTGTAAGACGCA  
CAACGGCGGAAGCAGCAGCAAGTGCCTCCTCATTAGTCAAGAACGATAGTCTAGGGATC  
AAAGACGATCAGATACCGTCGTAGTCTAGACCATAAACATATGTCGGTAAACACTT-GGCG  
ACGT-GC-TCTCCGAGGCGTCTCCAGGAGTTT-GTGGGAAACCAT-AAGCTTTTGGACTC  
TGGGGGAGTATGGCCGCAAGACTGAAACTTAAAGGAATTGACGGAAGGGCACACCATGTC  
CGTGGAG-CCTGCGGCTTAATTT-GACTCAACACGGGAAA-CCTTACCAAGCTCAGATAT  
GTATAGGATTGACAGA-CTAA-TAGATTTTTTCATGATCGCATAAGTAGTGGTGCATGGCC  
GTTCTTAG-TTGGTGGAGTGATTTGTGAGGTCAATTCCGGTAAACGACGAGACCTCCATT  
TGCTAACTAGTCCGCGGACGGGTTTCG--ACTGGCAGGGTTCGACCGGC-GCGGCTGCCT  
G-----GTCGAAAGGCTGGG--TAAGTGCCTGACGGTTAGTAG----CCTGGGCTCG  
TCT--TCGCGAATAAATAAAGT---AA-CTTCTTAGAAATACTCCG-ACACCAAGCCG  
GAGG-AAGTTGGAGGCAATAACAGGTCTGTGATGCCCTTAGATATCTT-GGGCCGCACGC  
GTGCTACAATGTAGCAGCGCAATAAG-C---TCTAAAAATGC-GCGGCGCGA-AA----GC  
GTCGCGGAAAAC--AGCAATCGTCTACGTAACAGGGACTG-ACGGTTGCAATAAC-GATCA  
CGAACGAGGAATGCCTTGTAGGCGGAGTCAATCTCGCGCCGAATCTGTCCCTGCCCT  
TTGTACACACCGCCGTCGCTCCTACCGATCGGACGGCGAGGTGAAGACGACGGACT---  
-----GTA-TCCTTC-ACG-GGAC-----GC-GGA--AAGT-CG-

T-T-TAAACCT--T----GTT--GTCT  
>AM168081.1\_Cavenderia\_stellata\_SAB7B  
TCTAAG-TATAAGCTCTTG-TACGGCTA-GA---CTGCAGACGGCTCATT--ACAA--CG

GTTGT-----AG---CTTCCAGGACATCCGG-GTCGCA---AGGCCTTCT-GGATAACCG  
CAGTAAATCGGGGCTAATACATATAAA-CGGAGGGGTAGAGGGGGC----AACCTGAAG  
TTTCTGCGATGGACACTTA-GCTATTC--GA-CCAACCC--CG-CAA-GGGAGTG--GTT  
GGAACCGGTTTCATATTGCTAATCGACT-CTAGCTTGTAGTAGTCTGATAAGTTCTATAG  
ACAACCTGCCCTATCAACTT--GATGGTAAGGTTTTGGCTTACCATGGTTATAACGGGTAA  
CGGGGAATCAGGGTTCGATTCCGGAGAGGACGCCTGAGAAACGGCGTCCACATCTACGGG  
TGGCAGCAGGCGCTAAATT-GCCCAATCTCAACAGAGAGGAGGCGGTGACAATAAATCC  
CGATGGCTTTGGGGCAACCCAGG--CCAATCAGAATAAGTACACATTAATCCCCTAA  
CC-AATATAATTGGAGGGCAAGTCTGGTGCCAGCAGCCGCGTAAATCCAGCTCCAA-TA  
GCATATACTAATGTTGTTGCAGTTAAAA-CGC-TCGTAGCT----CAATATCTTTT--G  
AG-CTAT-----TTACGATCGTGT--CACTCACCTGATG-G----CCCTTAAAGCTTGA  
G-GGTGAG----CGC-GGT-CGGCTCGAACAC-TGTAGGTCACGGTG-GTCT-----TAG  
CAATA-GGGCC--AT-----CGTAA---TCGACTGTGCATAAA-CCTTGATGCT  
CAAGGTA--GG-CCT-CTGG----GGGTAGATACGCAGT-GCATGGCATTGTGGAACAAG  
GCAT--CTCGCGGCTTAGTTGTTG-TGGCC-----GCGGGGGCAATGATTAATAGGGAG  
GAGCGGGGGCTTCATATTGCAGGGCGAGAGGTGAAATTCGTTGACCCTTGCAAGATGTC  
CTACAGCGAAAGCATTGGCCAAGTGCTCTCCATTAGTCAAGAACGAAAGTTTGGGGATC  
AAAGACGATCAGATACCGTCGTAGTCCAAACCATAAACTATGTGACCAAGTGATTAGGCG  
GGCTACCTTCTCAGAGAGTCCCTAGCAACTT-GTGGGAAACCAT-GAGTGCTTGACTC  
TGGGGGGAGTATGGTCGCAAGGCTGAAACTTAAAGGAATTGACGGAAGGGCACACCATGG  
AGTGGAG-CCTGCGGCTTAATTT-GACTCAACACGGGAAA-GCTTACCAAGCTCAGATAT  
GATAAGGATTGACAGA-CTAA-AAGATCTTTCATGATCTCATAAGTGGTGGTGCATGGTC  
GTTCTTAG-TTGGTGGAGTGAATTTGTCAAGTCAATTCCGGTAACGGACGAGACCTCGACC  
TGCTAACTAGTGGGCTTAGTTGTTCA--AATGGCGAAGCAATTTTGC-TTTTACTATG  
G----GTGGCAACCAT--T-CATAGTGGGGGTAGGGAGCGTATGTAGCCTGGGCCAG  
TGG--GTTTCAAAAATTAATAATT---AATCTTCTAGAGGTAAGTCTG-GCTCTAAGCCA  
GAGG-AAGTCCGAGGCAATAACAGGCTGTGTATGCCCTTAGATATCTT-GGGCCGCACGC  
GTGCTACAATGTAGGCGCTAATGAGTCTG--TAACA-T-TCC--AGCACCGC-AAG--GT  
GTCTGGTAATC-TTGAATCCCCTGCGTGATTGGGCTTG-ACCACTGTAAGTGT-GGTCA  
TCAACGAGGAATTCCTTGTATGCGCGAGTCACTATCTCGCGCAGAATCTGTCCCTGCCCT  
TTGTACACACCGCCGTCGCTCTACCGATCGAACGATCAGGTAAGTGGACAGACA---  
-----GAGACCCG-C-AAG-GGCT-----TT-TGA--AAGT-CC-  
A-T-TGAACCT--C----GCC--GTTT

>KF662214.1\_Cavenderia\_aureostipes\_var.\_helvetia\_HM592

-----  
--TGT----AT---CTTACAGGGCATCCGG-GTCGCA---AGACCTTCT-GGATAACCG  
CAGTAAATCGGGGCTAATACATACAAA-CGGAGGAATGGAGGGGGC----AACCTGAAG  
TTTCTGCGATGGACATTTA-GCTATTC--GA-CCAACCC--CG-CAA-GGGAATG--GTT  
GGAACCGGTTTCATATTGCTAATCGACT-CTAGCTTGTAGTAGTCTGATAAGCCCTATAG  
ACAACCGCCCTATCAACTT--GATGGTAAGGTTTTGGCTTACCATGGTTGTAACGGGTAA  
CGGGGAATCAGGGTTCGATTCCGGAGAGGACGCCTGAGAAACGGCGTCCACATCTACGGG  
TGGCAGCAGGCGCGTAAATT-GCCCAATCTCAACAGAGAGGAGGCGGTGACAATAAATCC  
CGATGGCTTTGGGGCAACCCAGG--CTAATCAGAATAAGTACACATTAATCCCCTAA  
CC-AATATAATTGGAGGGCAAGTCTGGTGCCAGCAGCCGCGTAAATCCAGCTCCAA-TA  
GCATATACTAATGTTGTTGCTAGTTAAAA-CGC-TCGTAGCT----GAATATCTTTT--G  
AG-CTAC-----TATCGGTTGTGT--T-----CTATTG-A----CCCACAAGG--GGA  
--GGT-AG----CGC-AGC-CGGCTCAAACAC-TGTAGGTCATGGCG-TTGG-----TAG  
TAATA-CTGAT--GT-----CATAA---TCGACTGTGCATAAA-CCTTGATGCT  
CAAGGTA--GG-CCT-TT---ATAGGTAGATACACAGT-GCATGGCATTGTGGAACAAG  
GCAT--CTCGCGGCTTAGTTGGT-GGGCC-----GCGGGGGCAATGATTAATAGGGAG  
GAGCGGGGGCTTCATATTGCAGGGCGAGAGGTGAAATTCGTTGACCCTTGCAAGATGTC  
CTACAGCGAAAGCATTGGCCAAGTGCTCCCATTAGTCAAGAACGAAAGTTTGGGGATC  
AAAGACGATCAGATACCGTCGTAGTCCAAACCATAAACTATGTGACCAAGCGATTAGGCG  
GGCTACCTTCTCGAGAGTGCCTAGCAGCTT-GTGGGAAACCAT-GAGTGCTTGACTC  
TGGGGGGAGTATGGTCGCAAGGCTGAAACTTAAAGGAATTGACGGAAGGGCACACCATGG  
AGTGGAG-CCTGCGGCTTAATTT-GACTCAACACGGGAAA-GCTTACCAAGCTCAGATAT  
GATAAGGATTGACAGA-CTAA-AAGATCTTTCATGATCTCATAAGTGGTGGTGCATGGTC  
GTTCTTAG-TTGGTGGAGTGAATTTGTCAAGTCAATTCCGGTAACGGACGAGACCTCGACC  
TGCTAACTAGTGGGATTCAATCTTCG--CTCGACGAGGCAGGCTTTGC-TTTGATTATA  
G-----GGGGCAACCTT-----TATAGTCGGG-TAAGGTTGTAT-TAGTCTGGGGGAG  
TGG--GTTTCAATAATTAATT---AATCTTCTAGAGGTAAGTCTG-GCTCTAAGCCA  
GAGG-AAGTCCGAGGCAATAACAGGCTGTGTAGTCCCTTAGATATCTT-GGGCCGCACGC  
GTGCTACAATGTAGGCGCTAATGAGTCT--TTATT-TATCC--AGCTCCGT-AAG--GA  
GTCTGGTAATC-TTGAATCCCCTGCGTGATTGGGCTTG-ACCACTGTAAGTGT-GGTCA  
TCAACGAGGAATTCCTTGTATGCGCGAGTCACTATCTCGCGCAGAATCTGTCCCTGCCCT  
TTGTACACACCGCCGTCGCTCTACCGATCGAACGATCAGGTAAGTGGACAGACT--  
-----TCGACTCG-C-AAG-AGTT-----T-----

>AM168084.1\_Cavenderia\_bifurcata\_UK5

TCTAAG-TATAAGCTCTG-TACGGCTA-GA---CTGCAGACGGCTCATT--ACAA--CG  
GTTGT-----AG---CTTCCAGGACATCCGG-GTCGCA---AGACCTTCT-GGATAACCG  
CAGTAAATCGGGGCTAATACATACAAA-CGGAGGGATGGATAGGGC----AACCTGAAG  
TTTCTGCGATGGACACTTA-GCTATTC--GA-CCAACCC--TGCAACAGGAATG--GTT

GGAACCGGTTTCATATTGCTAATCGACT-CTAGCTTGCTAGCAGTCTGATAAAGTCCTATAG  
ACAACCGCCCTATCAACTT--GATGGTAAGGTTTTGGCTTACCATGGTTGTAACGGGTAA  
CGGGGAATCAGGGTTCGATTCCGGAGAGGACGCCTGAGAAAACGGCGTCCACATCTACGGG  
TGGCAGCAGGCGCGTAAATT-GCCCAATCTCAACAGAGAGGAGGCGGTGACAATAAATCC  
CGATGGCTTTGGGGGCAACCCAGG--CCAATCAGAATAAGTACACATTAATCCCTTAA  
CC-AATATAATTGGAGGGCAAGTCTGGTCCAGCAGCCGCGGTAATTCCAGCTCAA-TA  
GCATATACTAATGTTGTCAGTTAAAA-CGC-TCGTAGCT----CAATTACTTTT--G  
AG-CTTA-----TTACGGTTGTTTCATTAGTTTGTCTAAA-G---GCCTCACGGCTAAT  
A-GGTAAATTGATAC-GAC-CGGCTCAAACAC-TGTAGGTCATGGCA-TTAG---GGAG  
CAATTTCTAGT--GT-----CATAA---TCGACTGTGCATAAAA-CCTTGATGCT  
CAAGGTA--GG-CCT-TT--TATAGGGCAGATACACAGT-GCATGGCATTGTGGAACAAG  
GCAT--CTCGCGGCTTAGTTGGT-GGGCC-----GCGGGGGCAATGATTAATAGGGAG  
GAGCGGGGGCCTTCATATTGCAGGGCGAGAGGTGAAATTCGTTGACCCTTGCAAGATGTC  
CGACAGCGAAAGCATTGGCCAAAGTGCCTCTCCATTAGTCAAGAACGAAAAGTTTGGGGATC  
AAAGACGATCAGATACCGTCTAGTCCAAACCATAAACTATGTCGACCAGCGATTAGGCG  
CGCTACCTTCTTCGAGAGCTGCCTAGCAGCTT-GTGGGAAAACCAT-GAGTGCTTGGACTC  
TGGGGGGAGTATGGTCGCAAGTCTGAAACTTAAAGGAATTGACGGAAGGGCACACCATGG  
AGTGGAG-CCTGCGGCTAATTT-GACTCAACACGGGAAA-GCTTACCAAGCTCAGATAT  
GATAAGGATTGACAGA-CTAA-AAGATCTTTCATGATCTCATAAGTGGTGGTGCATGGTC  
GTTCTTAG-TTGGTGGAGTGATTTGTACAGTCAATTCCGGTAACGGACGACCTCGACC  
TGCTAACTAGTGGGGTTCATTCTTCG--CTTGACGAGGCAGGTTTTGCCTTTGATTACA  
GAAG--GGGGGCAACTTCTTTT-TGTAGTTGGGGTAGAGTTTGTAG-TAGTCTGGAGGAG  
TGG--ACTTCAAAAATAAAAAAT--AATCTTCTAGAGGTACTTCTG-GCTCTAAGTCA  
GAGG-AAGTCCGAGGCAATAACAGGTCTGTGATGCCCTTAAATATCTT-GGGCCGACCG  
GTGCTACAATGTAGGCGCTAGAAAGTCA--TAATTAACC--ATCTCCGC-AAG--GA  
GTATGGTAATC-TTATAATCACCTGCGTGATTGGGCTTG-ACCAGTAACTGT-GGTCA  
TCAACGAGGAATTCCTTGTATGCGCGAGTCACTATCTCGCGCAGAATCTGTCCTGCCCT  
TTGTACACACCGCCGTCGCTCTACCGATCGAACGATCAGGTAAGTGGACAGACA---  
---C-----GAAGCTCG-C-AAG-AGCT-----TT-TGG--AAGT-CC-

A-T-TGAACCT--C---GCC--GTTT  
>AM168089.1 Cavenderia\_mexicana\_MexTF4B1

TCTAAG-TATAAGCTCTTG-TACGGCTA-GA---CTGCAGACGGCTCATT--ACAA--CG  
GTTGT-----AT---CTTCCAGGACATCCGG-GTCGAA---AGACCTTCT-GGATAACCG  
CAGTAAATCGGGGCTAATACATAAAA-CGGAGGGGTGGATAGGGC---AACCTTGAAG  
CTTCTGCGATGGACACTTA-GCTATTC--GA-CCAGCCC--CG-CAA-GGGAACG--GTT  
GGAACCGGTTTCATATTGCTAATCGACT-CTGGCTTGCCACGAGTCTGATAAAGTCCTATAG  
ACAACCGCCCTATCAACTT--GATGGTAAGGTTTTGGCTTACCATGGTTGTAACGGGTAA  
CGGGGAATCAGGGTTCGATTCCGGAGAGGACGCCTGAGAAAACGGCGTCCACATCTACGGG  
TGGCAGCAGGCGCGTAAATT-GCCCAATCTCAACAGAGAGGAGGCGGTGACAATAAATCC  
CGATGGCTTTGGGGGCAACCCAGG--CCAATCAGAATAAGTACACATTAATCCCTTAA  
CC-AATATAATTGGAGGGCAAGTCTGGTCCAGCAGCGGTAATTCCAGCTCAA-TA  
GCATATACTAATGTTGTCGAGTAAAAACGCCTCGTAGCT----TAATTACTTTT-G  
AG-CTAC-----TTACGGTTGTCCA-AC-TTTGCG-AAA-G---ACTTAACTTTCTCT  
A-GTGAAG---AAC-AAC-CGGCTCAGACAC-TGTAGGTCGTGGCA-TTGG---GG-G  
TAAT-CTAGT--GT-----CACTA---TCGACTGTGCATAAAA-CCTTGATGCT  
CAAGGTA--GG-CCT-TT---ATAGGGTAGATACACAGT-GCATGGCATTGTGGAACAAG  
GCAT--CTCGCGGCTTAGTTGGT-GGGCC-----GCGGGGGCAATGATTAATAGGGAG  
GAGCGGGGACCTTCATATTGCGAGGGCGAGAGGTGAAATTCGTTGACCCTTGCAAGATGAC  
CGACAGCGAAAGCATTGGTCAAGTGCCTTCCATTAGTCAAGAACGAAAAGTTTGGGGATC  
AAAAGCAGATCAGATACCGTCTAGTCCAAACCATAAACTATGTCGACCAGCGATTAGGCG  
GGCTACCTTCTTCGAGAGCTGCCTAGCAGCTT-GTGGGAAAACCAT-GAGTGCTTGGACTC  
TGGGGGGAGTATGGTCGCAAGGCTGAAACTTAAAGGAATTGACGGAAGGGCACACCATGG  
AGTGGAG-CCTGCGGCTAATTT-GACTCAACACGGGAAA-GCTTACCAAGCTCAGATAT  
GATAAGGATTGACAGA-CTAA-AAGATCTTTCATGATCTCATAAGTGGTGGTGCATGGTC  
GTTCTTAG-TTGGTGGAGTGATTTGTACAGTCAATTCCGGTAACGGACGAGACCTCGACC  
TGCTAACTAGTGGGGTTCATTCTTCG--CTCGATGAGGCAAGGTCTGC-TTTTATTGCA  
G-----GGGGTAACTCT----TGTAGTAGGG-TAGGCTTTGTAT-TAGTCTGGGGGAG  
TGG--ACTTC-CA--ATATAATTTAATCTTCTTAGAGGTACTTCTG-GCTCTAAGCCA  
GAGG-AAGTCCGAGGCAATAACAGGTCTGTGATGCCCTTAGATATCTT-GGGCCGACCG  
GTGCTACAATGTAGGCGCTAATGAGTC---GTAACATATCC--AGCTCCGT-AAG---GA  
GTCTGGTAATC-TTGGAAATCCCCTGCGTGATTGGGCTTG-ACTACTGTAAGTGT-GGTCA  
TCAACGAGGAATTCCTTGTATGCGTGAGTCACTATCTCACGAGAATCTGTCCTGCCCT  
TTGTACACACCGCCGTCGCTCTACCGATCGAACGATCAGGTAAGTGGACAGACT---  
-----TTAGCCCCG-C-AAG-GGTT-----TT-GGG--AAGT-CC-

A-T-TGAACCT--C---GCC--GTTT  
>AM168072.1 Cavenderia\_granulophora\_CHI1\_4

TCTAAG-TATAAGCTCTTG-TACGGCTA-GA---CTGCAGACGGCTCATT--ACAA--CG  
GTTGT-----AT---CTTCCAGGACATCCGG-GTCGCA---AGATCTTCT-GGATAACCG  
CAGTAAATCGGGGCTAATACATAAAA-CGAAGGGGCGAGAGGGC---AACCTTGAAG  
CTTCTGCGATGGACACTTA-GCTATTC--GA-CCAACCC--CG-CAA-GGGAATG--GTT  
GGAACCGGTTCAATTGCTAATCGACT-CTGGTTACCATGAGTC-GATAAGTCCCTATAG  
ACAACCGCCCTATCAACTT--GATGGTAAGGTTTTGGCTTACCATGGTTGTAACGGGTAA  
CGGGGAATCAGGGTTCGATTCCGGAGAGGACGCCTGAGAAAACGGCGTCCACATCTACGGG

TGGCAGCAGGCGCGTAAATT-GCCCAATCTCAACAGAGAGGAGGCGGTGACAATAAATCC  
CGATGGCTTTGGGGGCAACCCAGG--CCAATCAGAATAAGTACACATTAATCCCTTAA  
CC-AATATAAATTGGAGGGCAAGTCTGGTGCCAGCAGCCGCGGTAATTCCAGCTCCAA-TA  
GCATATACTAATGTTGTTGCAGTTAAAA-CGC-TCGTAGCT----TAATTTCTTTT--G  
AG-CTAC-----TTACGGTTGTC---ACC-CTGTG--AA-G----TCTTCGGACCTAGT  
A-GG-----AAC-AGC-CGGCTCAAACAC-TGTAGGTCATGGT-----GC----TAG  
CAATA-GC-----AT-----CATAA---TCGACTGTGCATAAAA-CCTTGATGCT  
CAAGGTA--GG-CCT-TT---TTAGGGTAGATACACAGT-GCATGGCATTGTGGAACAAG  
GCAT--CTCGCGGCTTAGTTGGT-GGGCC-----GCGGGGGCAATGATTAATAGGGAG  
GAGCGGGGGCCTTCATATTGCAGGGCGAGAGGTGAAATTCGTTGACCCTTGCAAGATGTC  
CGACAGCGAAAAGCATTGGCCAAGTGCCTCCCCATTAGTCAAGAACGAAAGTTTGGGGATC  
AAAGACGATCAGATACCGTCGTAGTCCAGACCATAAACTATGTGACCAGCGATTAGGCG  
GGTACCTTCTTCGAGAGCTGCCTAGCAGCT-GTGGGAAACCAT-GAGTGCTTGGACTC  
TGGGGGGAGTATGGTTCGAAAGGCTGAAACTTAAAGGAATTGACGGAAGGGCACACCATGG  
AGTGGAG-CCTGCGGCTTAATTT-GACTCAACACGGGAAA-GCTTACCAAGCTCAGATAT  
GATAAGGATTGACAGA-CTAA-AAGATCTTTCATGATCTCATAAGTGGTGGTGCATGGTC  
GTTCTTAG-TTGGTGGAGTGATTTGTCAGGTCAATTCCGGTAACGGACGAGACCTCGACC  
TGCTAACTAGTGGGATTCATTCTTCT--CTCGACGAGGCAGGTTCTGC-TTTTATTGTA  
A-----GGG-CAACT-T----TGCAGTAGGG-TAGGATTTGTAT-TAGTCTGGGGGAG  
TGG--ATTTTCATA--ATTTAATT---AATCTTCTAAGGTAAGGTAAGGTAAGGTAAGGTA  
GAGG-AAGTTCGAGGCAATAACAGGTCTGTGATGCCCTTAGATATCTT-GGGCCGCACGC  
GTGCTACAATGTAGGCGCTAATGAGTC---TTTTACATCC--AGCTCCGT-AAG---GA  
GTCTGGTAATC-TTGGAAATCCCCTGCGTGATTGGGCTTG-ACTACTGTAAGTGT-GGTCA  
TCAACGAGGAATTCCTTGTATGCGCGAGTCACTATCTCGCGCAGAATCTGTCCCTGCCCT  
TTGTACACACCGCCCGTCTCTACCGATCGAACGATCAGGTAAGTGGACAGACT---  
-----AGAGCCG-C-AAG-GCAT-----TT-GGA--AAGT-CC-  
A-T-TGAACCT--C---GCC--GTTT

>AM168088.1 Cavenderia medusoides\_OH592

TCTAAG-TATAAGCTCTTG-TACGGCTA-GA---CTGCAGACGGCTCATT--ACAA--CG  
GTTGT-----AT---CTTCCAGAACGTCCGG-GTCGCA---AGATCTTCT-GGATAACCG  
CAGTAAATCGGGGCTAATACATACAAA-CGAAGGGGTGGAGAGGGC----AACCTTGAAG  
CTTCTGCGATGGACACTTA-GCTATTC--GA-CCAACCC--CG-CAA-GGGAATG--GTT  
GGAACCGGTTTCATATTGCTAATCGACT-CTGGTTTACCATGAGTC-GATAAGTTCTATAG  
ACAACCGCCCTATCAACTT--GATGGTAAGGTTTTGGCTTACCATGGTTGTAACGGGTAA  
CGGGGAATCAGGGTTCGATTCCGGAGAGGACGCCTGAGAAACGGCGTCCACATCTACGGG  
TGGCAGCAGGCGCGTAAATTT-GCCCAATCTCAACAGAGAGGAGGCGGTGACAATAAATCC  
CGATGGCTTTGGGGGCAACCCAGG--CCAATCAGAATAAGTACACATTAATCCCTTAA  
CC-AATATAAATTGGAGGGCAAGTCTGGTGCCAGCAGCCGCGGTAATTCCAGCTCCAA-TA  
GCATATACTAATGTTGTTGCAGTTAAAA-CGC-TCGTAGCT----TAATTTCTTTT--G  
AG-CTAC-----TTACGGTTGTC---ACC-CTGTG--AA-G----TCTTCGGACCTAAT  
A-GG-----AAC-AGC-CGGCTCAAACAC-TGTAGGTCATGGTA-CTGG-----TA-  
-----ACAGT--AT-----CATAA---TCGACTGTGCATAAAA-CCTTGATGCT  
CAAGGTA--GG-CCT-TT---TTAGGGTAGATACACAGT-GCATGGCATTGTGGAACAAG  
GCAT--CTCGCGGCTTAGTTGGT-GGGCC-----GCGGGGGCAATGATTAATAGGGAG  
GAGCGGGGGCCTTCATATTGCAGGGCGAGAGGTGAAATTCGTTGACCCTTGCAAGATGTC  
CGACAGCGAAAAGCATTGGCCAAGTGCCTCCCCATTAGTCAAGAACGAAAGTTTGGGGATC  
AAAGACGATCAGATACCGTCGTAGTCCAAACCATAAACTATGTGACCAGCGATTAGGCG  
GGCTACCTTCTTCGAGAGCTGCCTAGCAGCTT-GTGGGAAACCAT-GAGTGCTTGGACTC  
TGGGGGAGTATGGTTCGAAAGGCTGAAACTTAAAGGAATTGACGGAAGGGCACACCATGG  
AGTGGAG-CCTGCGGCTTAATTT-GACTCAACACGGGAAA-GCTTACCAAGCTCAGATAT  
GATAAGGATTGACAGA-CTAA-AAGATCTTTCATGATCTCATAAGTGGTGGTGCATGGTC  
GTTCTTAG-TTGGTGGAGTGATTTGTCAGGTCAATTCCGGTAACGGACGAGACCTCGACC  
TGCTAACTAGTGGGATTCATTCTTCTG--CTCGACGAGGCAGGTTCTGC-TTTTATTGTA  
G-----GGG-CAACT-T-----TACAGTAGGG-TAGGATTTGTAT-TAGTCTGGGGGAG  
TGG--ATTTTCATA--ATTTAATT---AATCTTCTAAGGTAAGGTAAGGTAAGGTAAGGTA  
GAGG-AAGTTCGAGGCAATAACAGGTCTGTGATGCCCTTAGATATCTT-GGGCCGCACGC  
GTGCTACAATGTAGGCGCTAATGAGTC---TTTTACATCC--AGCTCCGT-AAG---GA  
GTCTGGTAATC-TTGGAAATCCCCTGCGTGATTGGGCTTG-ACTACTGTAAGTGT-GGTCA  
TCAACGAGGAATTCCTTGTATGCGCGAGTCACTATCTCGCGCAGAATCTGTCCCTGCCCT  
TTGTACACACCGCCCGTCTCTACCGATCGAACGATCAGGTAAGTGGACAGACT---  
-----AGAAGCCG-C-AAG-GTTT-----TT-GGA--AAGT-CC-  
A-T-TGAACCT--C---GCC--GTTT

>AM168083.1 Cavenderia aureostipes\_YA6

TCTAAG-TATAAGCTCTTG-TACGGCTA-GA---CTGCAGACGGCTCATT--ACAA--CG  
GTTGT-----AT---CTTCCAGGACATCCGG-GTCGCA---AGACCTTCT-GGATAACCG  
CAGTAAATCGGGGCTAATACATACAAA-CGAGGGGTAGAGAGGGC----AACCTTGAAG  
CTTCTGCGATGGACAATTA-GTTATTC--GA-CCAACCC--CG-CAA-GGGAATG--GTT  
GGAACCGGTTTCATATTGCTAATCGACT-CTAGCTTGTAGTGTGATAAGTCTTATAG  
ACAACCGCCCTATCAACTT--GATGGTAAGGTTTTGGCTTACCATGGTTGTAACGGGTAA  
CGGGGAATCAGGGTTCGATTCCGGAGAGGACGCCTGAGAAACGGCGTCCACATCTACGGG  
TGGCAGCAGGCGCGTAAATTT-GCCCAATCTCAACAGAGAGGAGGCGGCGACAATAAATCC  
CGATGGCTTTGGGGGCAACCCAGG--CCAATCAGAATAAGTACACATTAATCCCTTAA  
CC-AATATAAATTGGAGGGCAAGTCTGGTGCCAGCAGCCGCGGTAATTCCAGCTCCAA-TA

GCATATACTAATGTTGTTGTCAGTTAAAA-CGC-TCGTAGCT----CAATATCTTTT--G  
AG-C-GC-----TTTCGGCCGTT---CTCTTTAGC--TA-----CCGCA--AGGCTGT  
TAAAGA-----ACC-GGT-CGGCTCAAACAC-TGTAGGTCATGGTA-AAGT-----TAG  
CAATA-GCTTT--AT-----CATAA---TCGACTGTGCATAAAA-CCTTGATGCT  
CAAGGTA--GG-CCT-TT--TATAGGGTAGATACACAGT-GCATGGCATTGTGGAACAAG  
GCAT--CTCGCGGCTTAGTTGGT-GGGCC-----GCGGGGCAATGATTAATAGGGAG  
GAGCGGGGGCCTTCATATTGTCAGGGCGAGAGGTGAAATTCGTTGACCCTTGCAAGATGTC  
CTACAGCGAAAGCATTGGCCAAGTGCCCTCCCCATTAGTCAAGAACGAAAGTTTGGGGATC  
AAAGACGATCAGATACCGTCGTAGTCCAAACCATAAACTATGTGACACGCGATTAGGCC  
GGCTACCTTCTTCGAGAGCTGCTAGCAGCTT-GTGGGAAACCAT-GAGTGCTTGGACTC  
TGGGGGGAGTATGGTCGCAAGGCTGAAACTTAAAGGAATTGACGGAAGGGCACACCATGG  
AGTGGAG-CCTGCGGCTTAATTT-GACTCAACACGGGAAA-GCTTACCAAGCTCAGATAT  
GATTAGGATTGACAGA-CTAA-AAGATCTTTCATGATCTCATAAGTGGTGGTGCATGGTC  
GTTCTTAG-TTGGTGGAGTGAATTTGTCAGGTCAATTCCGGTAACGGACGAGACCTCGACC  
TGCTAACTAGTGGGATTCTTTTCG--ATTGACGAGGCAGGTTTTGC-TTTGATTATA  
G-----GGGGCAACTC-----TATAGTCGGG-TAGAGCTTGAT-TAGTCTGGGAGAG  
TGG--GTTTCAAAAATTAATAATT---AATCTTCTAGAGGTACTTCTG-GCTCTAAGCCA  
GAGG-AAGTCCGAGGCAATAACAGGTCTGTGATGCCCTTAGATATCTT-GGGCCGCACGC  
GTGTACAATGTAGGCGCTAATGAGTT---TATTTACATCC--ATCTCCGC-AAG---GA  
GTATGGTAATC-TTGGAAATCCCCTGCGTGATTGGGGCTG-ACCCTGTAAGTGT-GGTCA  
TCAACGAGGAATTCCTTGATGCGCGAGTCACTATCTCGCGCAGAATCTGTCCCTGCCCT  
TTGTACACACCGCCCGTCCTACCGATCGAACGATCAGGTAAGTGGACAGACT---  
-----GGAACCTCG-C-AAG-AGTT-----CT-TGG--AAGT-CC-  
A-T-TGAACCT--C---GCC--GTTT  
>KF662201.1\_Cavenderia\_aureostipes\_OH396

-----  
--TGT----AT---CTTCCAGGGCATCCGG-GTCGCA---AGACCTTCT-GGATAACCG  
CAGTAAATCGGGGCTAATACATATAAA-CGGAGGGATGGAGAGGGC----AACCTGAAG  
TTTCTGCGATGGACAATTA-GTTATTC--GA-CCAACCC--CG-CAA-GGGAATG--GTT  
GGAACCGGTTTCATATTGCTAATCGACT-CTAGCTTGTAGTAGTCTGATAAGCCCTATAG  
ACAACCCCTATCAACTT--GATGGTAAGGTTTTGGCTTACCATGGTTGTAACGGGTAA  
CGGGGAATCAGGGTTCGATTCCGGAGAGGACGCCTGAGAAAACGGCGTCCACATCTACGGG  
TGGCAGCAGGCGCGTAAATT-GCCCAATCTCAACAGAGAGGAGGCGGTGACAATAAATCC  
CGATGGCTTTGGGGCAACCCAGG--CTAATCAGAATAAGTACACATTAATCCCTTAA  
CC-AATATAAATGGAGGGCAAGTCTGGTGCCAGCAGCCGCGGTAATTCAGCTCCAA-TA  
GCATATACTAATGTTGTTGTCAGTTAAAA-CGC-TCGTAGCT----GAATATCTTTT--G  
AG-CTAC-----TATCGACTGTT---TTCCTTCTG--GA-----TCTTC--GGAAAAG  
GGAGG-----GGC-AGT-CGGCTCAAACAC-TGTAGGTCATG----CGGC---TAG  
CAATA-GTTG-----CATAA---TCGACTGTGCATAAAA-CCTTGATGCT  
CAAGGTA--GG-CCT-TT---ATAGGGTAGATACACAGT-GCATGGCATTGTGGAACAAG  
GCAT--CTCGCGGCTTAGTTGGT-GGGCC-----GCGGGGCAATGATTAATAGGGAG  
GAGCGGGGGCCTTCATATTGTCAGGGCGAGAGGTGAAATTCGTTGACCCTTGCAAGATGTC  
CTACAGCGAAAGCATTGGCCAAGTGCCCTCCCCATTAGTCAAGAACGAAAGTTTGGGGATC  
AAAGACGATCAGATACCGTCGTAGTCCAAACCATAAACTATGTGACACGCGATTAGGCC  
GGCTACCTTCTTCGAGAGCTGCTAGCAGCTT-GTGGGAAACCAT-GAGTGCTTGGACTC  
TGGGGGGAGTATGGTCGCAAGGCTGAAACTTAAAGGAATTGACGGAAGGGCACACCATGG  
AGTGGAG-CCTGCGGCTTAATTT-GACTCAACACGGGAAA-GCTTACCAAGCTCAGATAT  
GATTAGGATTGACAGA-CTAA-AAGATCTTTCATGATCTCATAAGTGGTGGTGCATGGTC  
GTTCTTAG-TTGGTGGAGTGATTGTCAGGTCAATTCCGGTAACGGACGAGACCTCGACC  
TGCTAACTAGTGGGATTCTTTTCG--ATTGACGAGGCAGGCTTTCG-TTTGATTATA  
G-----GGGGCAACTC-----TATAGTCGGG-TAGGGTTGTAG-TAGTCTGGAGGAG  
TGG--ATTTCAAA-AATTAATAATT---AATCTTCTAGAGGTACTTCTG-GCTCTAAGCCA  
GAGG-AAGTCCGAGGCAATAACAGGTCTGTGATGCCCTTAGATATCTT-GGGCCGCACGC  
GTGTACAATGTAGGCGCTAATGAGTT---TATTTACATCC--ATCTCCGC-AAG---GA  
GTATGGTAATC-TTGGAAATCACCTGCGTGATTGGGGCTG-ACCCTGTAAGTGT-GGTCA  
TCAACGAGGAATTCCTTGATGCGCGAGTCACTATCTCGCGCAGAATCTGTCCCTGCCCT  
TTGTACACACCGCCCGTCCTACCGATCGAACGATCAGGTAAGTGGACAGACT---  
-----GGAACCCG-C-AAG-GGTA-----CT-TG-----  
-----

>KF662199.1\_Cavenderia\_aureostipes\_B15A  
TCTAAG-TATAAGCTCTTG-TACGGCTA-GA---CTGCAGACGGCTCATT--ACAA--CG  
GTTGT----AT---CTTCCAGGGCATCCGG-GTCGCA---AGACCTTCT-GGATAACCG  
CAGTAAATCGGGGCTAATACATACAAA-CGGAGGGATGGAGAGGGC----AACCTGAAG  
TTTCTGCGATGGACAATTA-GTTATTC--GA-CCAACCC--CG-CAA-GGGAACG--GTT  
GGAACCGGTTTCATATTGCTAATCGACT-CTAGCTTGTAGTAGTCTGATAAGCCCTATAG  
ACAACCCCTATCAACTT--GATGGTAAGGTTTTGGCTTACCATGGTTGTAACGGGTAA  
CGGGGAATCAGGGTTCGATTCCGGAGAGGACGCCTGAGAAAACGGCGTCCACATCTACGGG  
TGGCAGCAGGCGCGTAAATT-GCCCAATCTCAACAGAGAGGAGGCGGTGACAATAAATCC  
CGATGGCTTTGGGGCAACCCAGG--CTAATCAGAATAAGTACACATTAATCCCTTAA  
CC-AATATAAATGGAGGGCAAGTCTGGTGCCAGCAGCCGCGGTAATTCAGCTCCAA-TA  
GCATATACTAATGTTGTTGTCAGTTAAAA-CGC-TCGTAGCT----TAATATCTTTT--G  
AG-CTAC-----TATCGATTGTT---ATTCCTTTG--GA-----TCCTCACGGTGAAG  
GAGGGA-----GGC-AAT-CGGCTCAAACAC-TGTAGGTCATG----CGGC---TAG

CAATA-GTTG-----CATAA---TCGACTGTGCATAAAA-CCTTGATGCT  
CAAGGTA--GG-CCT-TT---ATAGGGTAGATACACAGT-GCATGGCATTGTGGAACAAG  
GCAT--CTCGCGGCTTAGTTGGT-GGGCC-----GCGGGGGCAATGATTAATAGGGAG  
GAGCGGGGGCCTTCATATTGCAGGGCGAGAGGTGAAATTCGTTGACCCTTGCAAGATGTC  
CTACAGCGAAAGCATTGGCCAAGTGCCCTCCCATTAGTCAAGAACGAAAGTTTGGGGATC  
AAAGACGATCAGATACCGTCGTAGTCCAAACCATAAACTATGTGACCAGCGATTAGGCG  
GGCTACCTTCTTCGAGAGTGCCTAGCAGCTT-GTGGGAAACCAT-GAGTGCTTGGACTC  
TGGGGGGAGTATGGTCGCAAGGCTGAAACTTAAAGGAATTGACGGAAGGGCACACCATGG  
AGTGGAG-CCTGCGGCTAATTT-GACTCAACACGGGAAA-GCTTACCAAGCTCAGATAT  
GATTAGGATTGACAGA-CTAA-AAGATCTTTCATGATCTCATAAGTGGTGGTGCATGGTC  
GTTCTTAG-TTGGTGGAGTGATTTGTCAGGTCAATTCCGGTAACGGACGAGACCTCGACC  
TGCTAACTAGTGGGATTCATTCTTTCG--ATTGACGAGGCAGGTCTTGC-TTTGATTATA  
G-----GGGGCAACTT-----TATAGTCGGG-TACGGTTTGTAG-TAGTCTGGAGGAG  
TGG--ATTTCAA-AAATAAAT---AATCTTCTAGAGGTACTTCTG-GCTCTAAGCCA  
GAGG-AAGTCCGAGGCAATAACAGGTCTGTGATGCCCTTAGATATCTT-GGGCCGACGC  
GTGCTACAATGTAGGCGCTAATGAGTT---TATTTACATCC--ATCTCCGC-AAG---GA  
GTATGGTAATC-TTGAATCACCTGCGTGATTGGGCTTG-ACCAGTGAAGTGT-GGTCA  
TCAACGAGGAATCCTTGTATGCGCGAGTCACTATCTCGCGCAGAATCTGTCCCTGCCCT  
TTGTACACACCGCCGTCGCTCCTACCGATCGAACGATCAGGTAAGTGGACAGACT---  
-----GGAGCCCG-C-AAG-GGCA-----CT-TGG--AAGT-CC-  
A-T-TGAACCT--C---GCC--GTT-

>HQ141515.1\_Cavenderia\_subdiscoidea\_TH1A

TCTAAG-TATAAGCTCTTG-TACGGCTA-GA---CTGCAGACGGCTCATT--ACAA--CG  
GTTGT-----AT---CTTCCAGGGCATCCGG-GTCGCA---AGACCTTCT-GGATAACCG  
CAGTAAATCGGGGCTAATACATACAAA-CGGAGGGATGGAGAGGGC----AACCTGAAG  
TTTCTGCGATGGACAATTA-GTTATTC--GA-CCAACCC--CG-CAA-GGGAATG--GTT  
GGAACCGGTTTCATATTGCTAATCGACT-CTAGCTTGTAGTAGTCTGATAAGCCCTATAG  
ACAACCGCCCTATCAACTT--GATGGTAAGGTTTTGGCTTACCATGGTTGTAACGGGTAA  
CGGGGAATCAGGGTTCGATTCCGGAGAGGACGCCTGAGAAACGGCGTCCACATCTACGGG  
TGGCAGCAGGCGCGTAAATT-GCCCAATCTCAACAGAGAGGAGGCGGTGACAATAAATCC  
CGATGGCTTTGGGGGCAACCCAGG--CTAATCAGAATAAGTACACATTAATCCCTTAA  
CC-AATATAATTGGAGGGCAAGTCTGGTGCCAGCAGCCGGTAATTCCAGCTCCAA-TA  
GCATATACTAATGTTGTTGACGTTAAAA-CGC-TCGTAGCT-----TAATATCTTTT--G  
AG-CTAC-----TATCGACTGTT---TTCCTCTG--GA-----TCTTC--GGAAAAG  
GGAGG-----GGC-AGT-CGGCTCAAACAC-TGTAGGTCATG-----CGGC---TAG  
CAATA-GTTG-----CATAA---TCGACTGTGCATAAAA-CCTTGATGCT  
CAAGGTA--GG-CCT-TT---ATAGGGTAGATACACAGT-GCATGGCATTGTGGAACAAG  
GCAT--CTCGCGGCTTAGTTGGT-GGGCC-----GCGGGGGCAATGATTAATAGGGAG  
GAGCGGGGGCCTTCATATTGCAGGGCGAGAGGTGAAATTCGTTGACCCTTGCAAGATGTC  
CTACAGCGAAAGCATTGGCCAAGTGCCCTCCCATTAGTCAAGAACGAAAGTTTGGGGATC  
AAAGACGATCAGATACCGCTGATGCCAAACCATAAACTATGTGACCAGCGATTAGGGC  
GGCTACCTTCTTCGAGAGTGCCTAGCAGCTT-GTGGGAAACCAT-GAGTGCTTGGACTC  
TGGGGGGAGTATGGTCGCAAGGCTGAAACTTAAAGGAATTGACGGAAGGGCACACCATGG  
AGTGGAG-CCTGCGGCTAATTT-GACTCAACACGGGAAA-GCTTACCAAGCTCAGATAT  
GATTAGGATTGACAGA-CTAA-AAGATCTTTCATGATCTCATAAGTGGTGGTGCATGGTC  
GTTCTTAG-TTGGTGGAGTGATTTGTCAGGTCAATTCCGGTAACGGACGAGACCTCGACC  
TGCTAACTAGTGGGATTCATTCTTTCG--ATTGACGAGGCAGGTCTTGC-TTTGATTATA  
G-----GGGGCAACTT-----TATAGTCGGG-TAGGTTTTGTAG-TAGTCTGGAGGAG  
TGG--ATTTCAA-AAATAAAT---AATCTTCTAGAGGTACTTCTG-GCTCTAAGCCA  
GAGG-AAGTCCGAGGCAATAACAGGTCTGTGATGCCCTTAGATATCTT-GGGCCGACGC  
GTGCTACAATGTAGGCGCTAATGAGTT---TATTTACATCC--ATCTCCGC-AAG---GA  
GTATGGTAATC-TTGAATCACCTGCGTGATTGGGCTTG-ACCAGTGAAGTGT-GGTCA  
TCAACGAGGAATCCTTGTATGCGCGAGTCACTATCTCGCGCAGAATCTGTCCCTGCCCT  
TTGTACACACCGCCGTCGCTCCTACCGATCGAACGATCAGGTAAGTGGACAGACT---  
-----GGAACCCG-C-AAG-GGTA-----CT-TGG--AAGT-CC-  
A-T-TGAACCT--C---GCC--GTT-

>HQ141518.1\_Cavenderia\_pseudoaureostipes\_TH39A

TCTAAG-TATAAGCTCTTG-TACGGCTA-GA---CTGCAGACGGCTCATT--ACAA--CG  
GTTGT-----AT---CTTCCAGGGCATCCGG-GTCGCA---AGACCTTCT-GGATAACCG  
CAGTAAATCGGGGCTAATACATACAAA-CGGAGGGATGGAGAGGGC----AACCTGAAG  
TTTCTGCGATGGACAATTA-GTTATTC--GA-CCAACCC--CG-CAA-GGGAATG--GTT  
GGAACCGGTTTCATATTGCTAATCGACT-CTAGCTTGTAGTAGTCTGATAAGCCCTATAG  
ACAACCGCCCTATCAACTT--GATGGTAAGGTTTTGGCTTACCATGGTTGTAACGGGTAA  
CGGGGAATCAGGGTTCGATTCCGGAGAGGACGCCTGAGAAACGGCGTCCACATCTACGGG  
TGGCAGCAGGCGCGTAAAT-GCCCAATCTCAACAGAGAGGAGGCGGTGACAATAAATCC  
CGATGGCTTTGGGGGCAACCCAGG--CTAATCAGAATAAGTACACATTAATCCCTTAA  
CC-AATATAATTGGAGGGCAAGTCTGGTGCCAGCAGCCGGTAATTCCAGCTCCAA-TA  
GCATATACTAATGTTGTTGACGTTAAAA-CGC-TCGTAGCT-----TAATATCTTTT--G  
AG-CTAC-----TATCGACTGTT---ATTTCTGTG--GA-----TCCGCAAGGTGAAT  
CAGGGA-----GGC-AGT-CGGCTCAAACAC-TGTAGGTCATG-----CGGC---TAG  
CAATA-GTTG-----CATAA---TCGACTGTGCATAAAA-CCTTGATGCT  
CAAGGTA--GG-CCT-TT---ATAGGGTAGATACACAGT-GCATGGCATTGTGGAACAAG  
GCAT--CTCGCGGCTTAGTTGGT-GGGCC-----GCGGGGGCAATGATTAATAGGGAG



GAGCGGGGGCCCTTCATATTGCAGGGGCGAGAGGTGAAATTCGTTGACCCTTGCAAGATGTC  
CTACAGCGAAAGCATTGGCCAAGTGCCTCCCCCTAGTCAAGAACGAAAGTTTGGGGATC  
AAAGACGATCAGATACCGTCGTAGTCCAAACCATAAACTATGTGACCGAGCGATTAGGCC  
GGCTACCTTCTTCGAGAGCTGCCTAGCAGCTT-GTGGGAAACCAT-GAGTGCTTGGACTC  
TGGGGGGAGTATGGTGCAGAGGCTGAAACTTAAAGGAATTGACGGAAGGGCACACCATGG  
AGTGGAG-CCTGCGGCTTAATTT-GACTCAACACGGGAAA-GCTTACCAAGCTCAGATAT  
GATTAGGATTGACAGA-CTAA-AAGATCTTTCATGATCTCATAAAGTGGTGGTGCATGGTC  
GTTCTTAG-TTGGTGGAGTGATTTGTGAGGTC AATTCCGGTAACGGACGAGACCTCGACC  
TGCTAACTAGTGGGATTCATTCTTTCG--ATTGACGAGGCAGGTCTTGC-TTTGATTACA  
G-----GGGGCAACTTC-----TGAGTCCGGG-TACGGTTTGTAG-TAGTCTGGAGGAG  
TGG--GTTTCAA-AAATTAATTT---AATCTTCTAGAGGTAAGTCTG-GCTCTAAGCCA  
GAGG-AAGTCCGAGGCAATAACAGGTCTGTGATGCCCTTAGATATCTT-GGGCCGCACGG  
GTGCTACAATGTAGGCGCTAATGAGTT--TATTTACATCC--ATCTCCGC-AAG--GA  
GTATGGTAATC-TTGGAACTCACCTGCGTGATTGGGCTTG-ACCAGTGAACGTG-GGTCA  
TCAACGAGGAATTCCTTGTATGCGCGAGTCACTATCTCGCGAGAATCTGTCCCTGCCCT  
TTGTACACACCGCCCGTCTCTACCGATCGAACGATCAGGTAAGTGGACAGACT---  
-----GGAACCCG-C-AAG-GGTA-----CT-TGG--AAGT-CC-  
A-T-TGAACCT--C---GCC--GTT-

>HQ141517.1 Cavenderia sp. TH18B

TCTAAG-TATAAGCTCTTG-TACGGCTA-GA---CTGCAGACGGCTCATT--ACAA--CG  
GTTGT-----AT---CTTCCAGGGCATCCGG-GTCGCA---AGACCTTCT-GGATAACCG  
CAGTAAATCGGGGCTAATACATACAAA-CGGAGGGATGGAGAGGGC----AACCTTGAAG  
TTTCTGCGATGGACAATTA-GTTATTC--GA-CCAACCC--CG-CAA-GGGAATG--GTT  
GGAACCGGTTTCATATTGCTAATCGACT-CTAGCTTGCTAGTAGTCTGATAAGCCCTATAG  
ACAACCGCCCTATCAACTT--GATGGTAAGGTTTTGGCTTACCATGGTTGTAACGGGTAA  
CGGGGAATCAGGGTTCGATTCCGGAGAGGACGCCTGAGAAAACGGCGTCCACATCTACGGG  
TGGCAGCAGGGCGGTAATTT-GCCCAATCTCAACAGAGAGGAGGCGGTGACAATAAATCC  
CGATGGCTTTGGGGGCAACCCAGG--CTAATCAGAATAAGTACACATTAATCCCTTAA  
CC-AATATAATTGGAGGGCAAGTCTGGTGCCAGCAGCCGCGGTAATCCAGCTCCAA-TA  
GCATATACTAATGTTGTTGAGTTAAAA-CGC-TCGTAGCT-----TAATATCTTTT--G  
AG-CTAC-----TATCGATTGTT---ATCCTGCTG--AC-----CCGAA--AGGTGAT  
GTAGGA-----GGC-AGT-CGGCTCAAACAC-TGTAGGTCATG-----CGGC----TAG  
CAATA-GTTG-----CATAA---TCGACTGTGCATAAA-CCTTGATGCT  
CAAGGTA--GG-CCT-TT---ATAGGGTAGATACACAGT-GCATGGCATTGTGGAACAAG  
GCAT--CTCGCGGCTTAGTTGGT-GGGCC-----GCGGGGGCAATGATTAATAGGGAG  
GAGCGGGGCTTCATATTGCAGGGGCGAGAGGTGAAATTCGTTGACCCTTGCAAGATGTC  
CTACAGCGAAAGCATTGGCCAAGTGCCTCCCCATTAGTCAAGAACGAAAGTTTGGGGATC  
AAAGACGATCAGATACCGTCGTAGTCCAAACCATAAACTATGTGACCGAGCGATTAGGCC  
GGCTACCTTCTTCGAGAGCTGCCTAGCAGCTT-GTGGGAAACCAT-GAGTGCTTGGACTC  
TGGGGGGAGTATGGTGCAGAGGCTGAAACTTAAAGGAATTGACGGAAGGGCACACCATGG  
AGTGGAG-CCTGCGGCTTAATTT-GACTCAACACGGGAAA-GCTTACCAAGCTCAGATAT  
GATTAGGATTGACAGA-CTAA-AAGATCTTTCATGATCTCATAAAGTGGTGGTGCATGGTC  
GTTCTTAG-TTGGTGGAGTGATTTGTGAGGTC AATTCCGGTAACGGACGAGACCTCGACC  
TGCTAACTAGTGGGATTCATTCTTTCG--ATTGACGAGGCAGGTCTTGC-TTTGATTATA  
G-----GGGGCAACTTC-----TATAGTCCGGG-TACGGTTTGTAG-TAGTCTGGAGGAG  
TGG--ATTTCAA-AAATTAATTT---AATCTTCTAGAGGTAAGTCTG-GCTCTAAGCCA  
GAGG-AAGTCCGAGGCAATAACAGGTCTGTGATGCCCTTAGATATCTT-GGGCCGCACGG  
GTGCTACAATGTAGGCGCTAATGAGTT--TATTTACATCC--ATCTCCGC-AAG--GA  
GTATGGTAATC-TTGGAACTCACCTGCGTGATTGGGCTTG-ACCAGTGAACGTG-GGTCA  
TCAACGAGGAATTCCTTGTATGCGCGAGTCACTATCTCGCGAGAATCTGTCCCTGCCCT  
TTGTACACACCGCCCGTCTCTACCGATCGAACGATCAGGTAAGTGGACAGACT---  
-----GGAGCCCG-C-AAG-GGTT-----CT-TGG--AAGT-CC-  
A-T-TGAACCT--C---GCC--GTT-

>HQ141523.1 Cavenderia bhumiboliana THC11X

TCTAAG-TATAAGCTCTTG-TACGGCTA-GA---CTGCAGACGGCTCATT--ACAA--CG  
GTTGT-----AT---CTTCCAGGGCATCCGG-GTCGCA---AGACCTTCT-GGATAACCG  
CAGTAAATCGGGGCTAATACATACAAA-CGGAGGGATGGAGAGGGC----AACCTTGAAG  
TTTCTGCGATGGACAATTA-GTTATTC--GA-CCAACCC--CG-CAA-GGGAATG--GTT  
GGAACCGGTTTCATATTGCTAATCGACT-CTAGCTTGCTAGTAGTCTGATAAGCCCTATAG  
ACAACCGCCCTATCAACTT--GATGGTAAGGTTTTGGCTTACCATGGTTGTAACGGGTAA  
CGGGGAATCAGGGTTCGATTCCGGAGAGGACGCCTGAGAAAACGGCGTCCACATCTACGGG  
TGGCAGCAGGGCGGTAATTT-GCCCAATCTCAACAGAGAGGAGGCGGTGACAATAAATCC  
CGATGGCTTTGGGGGCAACCCAGG--CTAATCAGAATAAGTACACATTAATCCCTTAA  
CC-AATATAATTGGAGGGCAAGTCTGGTGCCAGCAGCCGCGGTAATCCAGCTCCAA-TA  
GCATATACTAATGTTGTTGAGTTAAAA-CGC-TCGTAGCT-----TAATATCTTTT--G  
AG-CTAC-----TATCGATTGTT---ATCCTGCTG--AC-----CCGAA--AGGTGAT  
GTAGGA-----GGC-AGT-CGGCTCAAACAC-TGTAGGTCATG-----CGGC----TAG  
CAATA-GTTG-----CATAA---TCGACTGTGCATAAA-CCTTGATGCT  
CAAGGTA--GG-CCT-TT---ATAGGGTAGATACACAGT-GCATGGCATTGTGGAACAAG  
GCAT--CTCGCGGCTTAGTTGGT-GGGCC-----GCGGGGGCAATGATTAATAGGGAG  
GAGCGGGGCTTCATATTGCAGGGGCGAGAGGTGAAATTCGTTGACCCTTGCAAGATGTC  
CTACAGCGAAAGCATTGGCCAAGTGCCTCCCCATTAGTCAAGAACGAAAGTTTGGGGATC  
AAAGACGATCAGATACCGTCGTAGTCCAAACCATAAACTATGTGACCGAGCGATTAGGCC

GGCTACCTTCTTCGAGAGCTGCCTAGCAGCTT-GTGGGAAAACCAT-GAGTGCTTGGACTC  
TGGGGGGAGTATGGTCGCAAGGCTGAACTTAAAGGAATTGACGGAAGGGCACACCATGG  
AGTGGAG-CCTGCGGCTTAATTT-GACTCAACACGGGAAA-GCTTACCAAGCTCAGATAT  
GATTAGGATTGACAGA-CTAA-AAGATCTTTCATGATCTCATAAGTGGTGGTGCATGGTC  
GTTCTTAG-TTGGTGGAGTGAATTTGTCAGGTCAATTCCGGTAACGGACGAGACCTCGACC  
TGCTAACTAGTGGGATTCATTCTTCG--ATTGACGAGGCAGGTCTTGC-TTTGATTATA  
G-----GGGGCAACTTC-----TATAGTCGGG-TACGGTTTGTAG-TAGTCTGGAGGAG  
TGG--ATTTCAA-AATTAAT---AATCTTCTAGAGGTACTTCTG-GCTCTAAGCCA  
GAGG-AAGTCCGAGGCAATAACAGGTCTGTGATGCCCTTAGATATCTT-GGGCCGCACGC  
GTGCTACAATGTAGGCGTAATGAGTT---TATTTACATCC--ATCTCCGC-AAG---GA  
GTATGGTAATC-TTGAATCACCTGCGTGATTGGGCTTG-ACCCTGTAAGTGT-GGTCA  
TCAACGAGGAATTCCTTGTATGCGCGAGTCACTATCTCGCGCAGAATCTGTCCCTGCCCT  
TTGTACACACCGCCCGTCGCTCTACCGATCGAACGATCAGGTAAGTGGACAGACT---  
-----GGAGCCCG-C-AAG-GGTT-----CT-TGG--AAGT-CC-

A-T-TGAACCT--C---GCC--GTTT

>MH745572.1 *Cavenderia protodigitata* TH18BA

TCTAAG-TATAAGCTCTTG-TACGGCTA-GA---CTGCAGACGGCTCATT--ACAA--CG  
GTTGT-----AT---CTTCCAGGGCATCCGG-GTCGCA---AGACCTTCT-GGATAACCG  
CAGTAAATCGGGCTAATACATACAAA-CGGAGGGATGGAGAGGGC----AACCTGAAG  
TTTCTGCGATGGACAATTA-GTTATTC--GA-CCAACCC--CG-CAA-GGGAATG--GTT  
GGAACCGGTTTCATATTGCTAATCGACT-CTAGCTTGTAGTAGTCTGATAAGCCCTATAG  
ACAACCGCCCTATCAACTT--GATGGTAAGGTTTTGGCTTACCATGGTTGTAACGGGTAA  
CGGGGAATCAGGGTTCGATTCCGGAGAGGACGCCTGAGAAACGGCGTCCACATCTACGGG  
TGGCAGCAGGCGCTGAAAT--GCCAATCTCAACAGAGAGGAGGGCGTGACAATAAATCC  
CGATGGCTTTGGGGCAACCCAGG--CTAATCAGAATAAGTACACATTAATCCCTTAA  
CC-AATATAATTGGAGGGCAAGTCTGGTGCCAGCAGCCGCGGTAATTCCAGCTCCAA-TA  
GCATATACTAATGTTGTTGCAGTTAAAA-CGC-TCGTAGCT----TAATATCTTTT--G  
AG-CTAC-----TATCGACTGTT---ATCTGCTG--AC-----CCGAA--AGGTGAT  
GTAGGA-----GGC-AGT-CGGCTCAAACAC-TGTAGGTCATG-----CGGC---TAG  
CAATA-GTTG-----CATAA---TCGACTGTGCATAAA-CCTTGATGCT  
CAAGGTA--GG-CCT-TT---ATAGGGTAGATACACAGT-GCATGGCATTGTGGAACAAG  
GCAT--CTCGCGCTTAGTTGGT-GGGCC-----GCGGGGCAATGATTAATAGGGAG  
GAGCGGGGGCTTCATATTGCAGGGCGAGAGGTGAAATTCGTTGACCCTTGCAAGATGTC  
CTACAGCGAAAGCATTGGCCAAGTGCTCCCATAGTCAAGAACGAAAGTTTGGGGATC  
AAAGACGATCAGATACCGTCGTAGTCCAAACCATAAACTATGTGACACGCGATTAGGGC  
GGCTACCTTCTTCGAGAGCTGCCTAGCAGCTT-GTGGGAAAACCAT-GAGTGCTTGGACTC  
TGGGGGGAGTATGGTCGCAAGGCTGAACTTAAAGGAATTGACGGAAGGGCACACCATGG  
AGTGGAG-CCTGCGGCTTAATTT-GACTCAACACGGGAAA-GCTTACCAAGCTCAGATAT  
GATTAGGATTGACAGA-CTAA-AAGATCTTTCATGATCTCATAAGTGGTGGTGCATGGTC  
GTTCTTAG-TTGGTGGAGTGAATTTGTCAGGTCAATTCCGGTAACGGACGAGACCTCGACC  
TGCTAACTAGTGGGATTCATTCTTCG--ATTGACGAGGCAGGTCTTGC-TTTGATTATA  
G-----GGGGCAACTTC-----TATAGTCGGG-TACGGTTTGTAG-TAGTCTGGAGGAG  
TGG--ATTTCAA-AATTAAT---AATCTTCTAGAGGTACTTCTG-GCTCTAAGCCA  
GAGG-AAGTCCGAGGCAATAACAGGTCTGTGATGCCCTTAGATATCTT-GGGCCGCACGC  
GTGCTACAATGTAGGCGTAATGAGTT---TATTTACATCC--ATCTCCGC-AAG---GA  
GTATGGTAATC-TTGAATCACCTGCGTGATTGGGCTTG-ACCCTGTAAGTGT-GGTCA  
TCAACGAGGAATTCCTTGTATGCGCGAGTCACTATCTCGCGCAGAATCTGTCCCTGCCCT  
TTGTACACACCGCCCGTCGCTCTACCGATCGAACGATCAGGTAAGTGGACAGACT---  
-----GGAGCCCG-C-AAG-GGTT-----CT-TGG--AAGT-CC-

A-T-TGAACCT--C---GCC--GTT

>HQ141522.1 *Cavenderia myxobasis* NT2A

TCTAAG-TATAAGCTCTTG-TACGGCTA-GA---CTGCAGACGGCTCATT--ACAA--CG  
GTTGT-----AT---CTTCCAGGGCATCCGG-GTCGCA---AGACCTTCT-GGATAACCG  
CAGTAAATCGGGCTAATACATACAAA-CGGAGGGATGGAGAGGGC----AACCTGAAG  
TTTCTGCGATGGACAATTA-GTTATTC--TA-CCAACCC--CG-CAA-GGGAATG--GTT  
GGAACCGGTTTCATATTGCTAATCGACT-CTAGCTTGTAGTAGTCTGATAAGCCCTATAG  
ACAACCGCCCTATCAACTT--GATGGTAAGGTTTTGGCTTACCATGGTTGTAACGGGTAA  
CGGGGAATCAGGGTTCGATTCCGGAGAGGACGCCTGAGAAACGGCGTCCACATCTACGGG  
TGGCAGCAGGCGCTGAAAT--GCCAATCTCAACAGAGAGGAGGGCGTGACAATAAATCC  
CGATGGCTTTGGGGCAACCCAGG--CTAATCAGAATAAGTACACATTAATCCCTTAA  
CC-AATATAATTGGAGGGCAAGTCTGGTGCCAGCAGCCGCGGTAATTCCAGCTCCAA-TA  
GCATATACTAATGTTGTTGTCAGTTAAAA-CGC-TCGTAGCT----TAATATCTTTT--G  
AG-CTAC-----TATCGACTGTT---TTCCTTCTA--AC-----TCTTC--GGAGGAG  
GAAG-----GGC-AGT-CGGCTCAAACAC-TGTAGGTCATG-----CGGC---TAG  
CAATA-GTTG-----CATAA---TCGACTGTGCATAAA-CCTTGATGCT  
CAAGGTA--GG-CCT-TT---ATAGGGTAGATACACAGT-GCATGGCATTGTGGAACAAG  
GCAT--CTCGCGCTTAGTTGGT-GGGCC-----GCGGGGCAATGATTAATAGGGAG  
GAGCGGGGGCTTCATATTGCAGGGCGAGAGGTGAAATTCGTTGACCCTTGCAAGATGTC  
CTACAGCGAAAGCATTGGCCAAGTGCTCCCATAGTCAAGAACGAAAGTTTGGGGATC  
AAAGACGATCAGATACCGTCGTAGTCCAAACCATAAACTATGTGACACGCGATTAGGGC  
GGCTACCTTCTTCGAGAGCTGCTAGCAGCTT-GTGGGAAAACCAT-GAGTGCTTGGACTC  
TGGGGGGAGTATGGTCGCAAGGCTGAACTTAAAGGAATTGACGGAAGGGCACACCATGG  
AGTGGAG-CCTGCGGCTTAATTT-GACTCAACACGGGAAA-GCTTACCAAGCTCAGATAT

GATTAGGATTGACAGA-CTAA-AAGATCTTTCATGATCTCATAAGTGGTGGTGCATGGTC  
GTTCTTAG-TTGGTGGAGTGATTTGTGAGGTC AATTCGGTAACGGACGAGACCTCGACC  
TGCTAACTAGTGGGATTCATCTTTTCG--ATTGACGAGGCAGGTATTGC-TTTGATTATA  
G-----GGGGCAACTTC-----TATAGTCGGG-TAGTGCTTGTAG-TAGTCTGGAGGAG  
TGG--ATTTCAAA-AATTA AATTT---AATCTTCTAGAGGTA CTCTG-GCTCTAAGCCA  
GAGG-AAGTCCGAGGCAATAACAGGCTGTGTATGCCCTTAGATATCTT-GGGCCGCACGC  
GTGCTACAATGTAGGCGCTAATGAGTT---TATTTACATCC--ATCTCCGC-AAGT--GA  
GTATGGTAATC-TTGAATCACCTGCGTGATTGGGCTTG-ACC ACTGTA ACTGT-GGTCA  
TCAACGAGGAATTCCTTGTATGCGCGAGTCACTATCTCGCGCAGAATCTGTCCCTGCCCT  
TTGTACACACCGCCCGTCTCTACCGATCGAACGATCAGGTA AAGTGGACAGACT---  
-----GGAACCCG-C-AAG-GGTA-----CT-TGG--AAGT-CC-

A-T-TGAACCT--C---GCC--GTTT  
>AM16807.1 Cavenderia fasciculata SH3

TCTAAG-TATAAGCTCTTG-TACGGCTA-GA---CTGCAGACGGCTCATT--ACAA--CG  
GTTGT-----AT---CTTACAGGGCATCCGG-GTCGCA---AGACCTTCT-GGATAACCG  
CAGTAAATCGGGGCTAATACATATAAAA-CGGAGGGATGGAGAGGGT----AACCTTGAAG  
TTTCTGCGATGGACATTTA-GCTATTC--GA-CCAACCC--CG-CAA-GGGAATG--GTT  
GGAACCGGTTCAATTTGCTAATCGACT-CTAGCTTGTAGTAGTCTGATAAGCCCTATAG  
ACAACCGCCCTATCAACTT--GATGGTAAGGTTTTGGCTTACCATGGTTGTAACGGGTAA  
CGGGGAATCAGGGTTCGATTCCGGAGAGGACGCCTGAGAAAACGGCGTCCACATCTACGGG  
TGGCAGCAGGCGCGTAAATT-GCCCAATCTCAACAGAGAGGAGGCGGTGACAATAAATCC  
CGATGGCTTTGGGGGCAACCCAGG--CTAATCAGAATAAGTACACATTA AATCCCTTAA  
CC-AATATAATTGGAGGGCAAGTCTGGTGCCAGCAGCCGCGGTAATTCCAGCTCAA-TA  
GCATATACTAATGTTGTCAGTTA AAAAA-CGC-TCGTAGCT-----TAATATCTTTT--G  
AG-CTAC-----TATCGACTGTC---ATCCTCTCTTG-ATC---CGTTAAAAG-TGAG  
AGGGAG-----GACCAGT-CGGCTCAAACAC-TGTAGGTCATG-----CGGC----TAG  
CAATA-GTTG-----CATAA---TCGACTGTGCATAAAA-CCTTGATGCT  
CAAGGTA--GG-CCT-TT---ATAGGGTAGATACACAGT-GCATGGCATTGTGGAACAAG  
GCAT--CTCGCGGCTTAGTTGGT-GGGCC-----GCGGGGGCAATGATTAATAGGGAG  
GAGCGGGGGCTTCATATTGCAGGGCGAGAGGTGAAATTCGTTGACCCTTGCAAGATGTC  
CTACAGCGAAAGCATTGGCCAAGTGCCTCCCCATTAGTCAAGAACGAAAAGTTTGGGGATC  
AAAGACGATCAGATACCGTCTAGTCCAAACCATAAACTATGTGACACAGCGATTAGGCG  
GGCTACCTTCTTCGAGAGCTGCTTAGCAGCTT-GTGGGAAAACCAT-GAGTGCTTGGACTC  
TGGGGGGAGTATGGTCGCAAGGCTGAAACTTAAAGGAATTGACGGAAGGGCACACCATGG  
AGTGGAG-CCTGCGGCTTAATTT-GACTCAACACGGGAAA-GCTTACCAAGCTCAGATAT  
GATTAGGATTGACAGA-CTAA-AAGATCTTTCATGATCTCATAAGTGGTGGTGCATGGTC  
GTTCTTAG-TTGGTGGAGTGATTTGTGAGGTC AATTCGGTAACGGACGAGACCTCGACC  
TGCTAACTAGTGGGATTCATCTTTTCG--ATTGACGAGGCAGGTATTGC-TTTGATTATA  
G-----GGGGCAACTTC-----TATAGTCGGG-TAGTGCTTGTAT-TAGTCTGGGAGAG  
TGG--GTTTCAA-AATTTAATTT---AATCTTCTAGAGGTA CTCTG-GCTCTAAGCCA  
GAGG-AAGTCCGAGGCAATAACAGGCTGTGTATGCCCTTAGATATCTT-GGGCCGCACGC  
GTGCTACAATGTAGGCGCTAATGAGTT---TATTTACATCC--ATCTCCGC-AAG--GA  
GTATGGTAATC-TTGAATCCCTGCGTGATTGGGCTTG-ACC ACTGTA ACTGT-GGTCA  
TCAACGAGGAATTCCTTGTATGCGCGAGTCACTATCTCGCGCAGAATCTGTCCCTGCCCT  
TTGTACACACCGCCCGTCTCTACCGATCGAACGATCAGGTA AAGTGGACAGACT---  
-----TTGGCCCG-C-AAG-GGTT-----GT-TGG--AAGT-CC-

A-T-TGAACCT--C---GCC--GTTT  
>GQ496157.1 Cavenderia fasciculoidea

TCTAAG-TATAAGCTCTTG-TACGGCTA-GA---CTGCAGACGGCTCATT--ACAA--CG  
GTTGT-----AT---CTTACAGGGCATCCGG-GTCGCA---AGACCTTCT-GGATAACCG  
CAGTAAATCGGGGCTAATACATATAAAA-CGGAGGGATGGAGAGGGT----AACCTTGAAG  
TTTCTGCGATGGACATTTA-GCTATTC--GA-CCAACCC--CG-CAA-GGGAATG--GTT  
GGAACCGGTTCAATTTGCTAATCGACT-CTAGCTTGTAGTAGTCTGATAAGCCCTATAG  
ACAACCGCCCTATCAACTT--GATGGTAAGGTTTTGGCTTACCATGGTTGTAACGGGTAA  
CGGGGAATCAGGGTTCGATTCCGGAGAGGACGCCTGAGAAAACGGCGTCCACATCTACGGG  
TGGCAGCAGGCGCGTAAATT-GCCCAATCTCAACAGAGAGGAGGCGGTGACAATAAATCC  
CGATGGCTTTGGGGGCAACCCAGG--CTAATCAGAATAAGTACACATTA AATCCCTTAA  
CC-AATATAATTGGAGGGCAAGTCTGGTGCCAGCAGCCGCGGTAATTCCAGCTCAA-TA  
GCATATACTAATGTTGTCAGTTA AAAAA-CGC-TCGTAGCT-----TAATATCTTTT--G  
AG-CTAC-----TATCGACTGTC---ATCCTCTCTTG-ATC---CGTTAAAAG-TGAG  
AGGGAG-----GACCAGT-CGGCTCAAACAC-TGTAGGTCATG-----CGGC----TAG  
CAATA-GTTG-----CATAA---TCGACTGTGCATAAAA-CCTTGATGCT  
CAAGGTA--GG-CCT-TT---ATAGGGTAGATACACAGT-GCATGGCATTGTGGAACAAG  
GCAT--CTCGCGGCTTAGTTGGT-GGGCC-----GCGGGGGCAATGATTAATAGGGAG  
GAGCGGGGGCTTCATATTGCAGGGCGAGAGGTGAAATTCGTTGACCCTTGCAAGATGTC  
CTACAGCGAAAGCATTGGCCAAGTGCCTCCCCATTAGTCAAGAACGAAAAGTTTGGGGATC  
AAAGACGATCAGATACCGTCTAGTCCAAACCATAAACTATGTGACACAGCGATTAGGCG  
GGCTACCTTCTTCGAGAGCTGCTTAGCAGCTT-GTGGGAAAACCAT-GAGTGCTTGGACTC  
TGGGGGGAGTATGGTCGCAAGGCTGAAACTTAAAGGAATTGACGGAAGGGCACACCATGG  
AGTGGAG-CCTGCGGCTTAATTT-GACTCAACACGGGAAA-GCTTACCAAGCTCAGATAT  
GATTAGGATTGACAGA-CTAA-AAGATCTTTCATGATCTCATAAGTGGTGGTGCATGGTC  
GTTCTTAG-TTGGTGGAGTGATTTGTGAGGTC AATTCGGTAACGGACGAGACCTCGACC  
TGCTAACTAGTGGGATTCATCTTTTCG--ATTGACGAGGCAGGTATTGC-TTTGATTATA

G-----GGGGCAACTTT-----TATAGTCGGG-TAGTGCTTGTAT-TAGTCTGGGAGAG  
TGG--GTTTCAA-AATTTAATT---AATCTTCTAGAGGTAATTCTG-GCTCTAAGCCA  
GAGG-AAGTCCGAGGCAATAACAGGCTGTGATGCCCTTAGATATCTT-GGGCCGCACGC  
GTGCTACAATGTAGGCGCTAATGAGTT---TATTTACATCC--ATCTCCGC-AAG---GA  
GTATGGTAATC-TTGAATCCCCTGCGTGATTGGGCTTG-ACCACTGTAACGTG-GGTCA  
TCAACGAGGAATTCCTGTATGCGCGAGTCACTATCTCGCGCAGAATCTGTCCCTGCCCT  
TTGTACACACCGCCCTGCTCTACCGATCGAACGATCAGGTAAGTGGACAGACT---  
-----TTGGCCCG-C-AAG-GGTT-----GT-TGG--AAGT-CC-  
A-T-TGAACCT--C---GCC--GTT-  
>AM168093.1\_Cavenderia\_delicata\_TNS\_C\_226  
TCTAAG-TATAAGCTCTTG-TACGGCTA-GA---CTGCAGACGGCTCATT--ACAA--CG  
GTTGT-----AT---CTTACAGGGCATCCGG-GTCGCA---AGACCTTCT-GGATAACCG  
CAGTAAATCGGGGCTAATACATACAAA-CGGAGGGATGGAGAGGGT----AACCTTGAAG  
TTTCTGCGATGGACATTTA-GCTATTC--GA-CCAACCC--CG-CAA-GGGAATG--GTT  
GGAACCGGTTTCAATTTGCTAATCGACT-CTAGCTTGCTAGTAGTCTGATAAGCCCTATAG  
ACAACCGCCCTATCAACTT--GATGGTAAGGTTTTGGCTTACCATGGTTGTAACGGGTAA  
CGGGGAATCAGGGTTCGATTCCGGAGAGGACGCCTGAGAAACGGCGTCCACATCTACGGG  
TGGCAGCAGGCGCGTAAATT-GCCCAATCTCAACAGAGAGGAGGCGGTGACAATAAATCC  
CGATGGCTTTGGGGCAACCCAGG--CTAATCAGAATAAGTACACATTAATCCCTTAA  
CC-AATATAAATTGGAGGGCAAGTCTGGTGCCAGCAGCCGCGTAATTCAGCTCCAA-TA  
GCATATACTAATGTTGTTGCAGTAAAA-CGC-TCGTAGCT----TAATATCTTTT--G  
AG-CTAC-----TATCGACTGTC---ATCCTTTTGTG-GCG----CCTTCGGGT-TAAG  
CAGGAG-----GACCGGT-CGGCTCAAACAC-TGTAGGTCATG-----CGGC----TAG  
CAATA-GTTG-----CATAA---TCGACTGTGCATAAA-CCTTGATGCT  
CAAGGTA--GG-CCT-TT---ATAGGGTAGATACACAGT-GCATGGCATTGTGGAACAAG  
GCAT--CTCGCGCTTAGTTGGT-GGGCC-----GCGGGGGCAATGATTAATAGGGAG  
GAGCGGGGGCCTTCATATTGCAAGGGCGAGAGGTGAAATTCGTTGACCCTTGCAAGATGTC  
CTACAGCGAAAGCATTGGCCAAGTGCCTCCCCATTAGTGAAGAACGAAAGTTTGGGGATC  
AAAGACGATCAGATACCGTCTAGTCCAAACCATAAACTATGTGACACAGCGATTAGGCG  
GGCTACCTTCTTCGAGAGCTGCCTAGCAGCTT-GTGGGAAACCAT-GAGTGCTTGGACTC  
TGGGGGGAGTATGGTTCGAAAGGCTGAAACTTAAAGGAATTGACGGAAGGGCACACCATGG  
AGTGGAG-CCTGCGGCTTAATTTGACTCAACACGGGAAA-GCTTACCAAGCTCAGATAT  
GATTAGGATTGACAGA-CTAA-AAGATCTTTCATGATCTCATAAGTGGTGGTGCATGGTC  
GTTCTTAG-TTGGTGGAGTGTATTTGTCAGGTCAATTCCGGTAACGGACGAGACCTCGACC  
TGCTAACTAGTGGGATTCATCTTTCG--ATTGACGAGGCAGGTATTGC-TTTGATTATA  
G-----GGGGCAACTTT-----TATAGTCGGG-TAGTGCTTGTAT-TAGTCTGGGAGAG  
TGG--GTTTCAA-AATTTAATT---AATCTTCTAGAGGTAATTCTG-GCTCTAAGCCA  
GAGG-AAGTCCGAGGCAATAACAGGCTGTGATGCCCTTAGATATCTT-GGGCCGCACGC  
GTGCTACAATGTAGGCGCTAATGAGTT---TATTTACATCC--ATCTCCGC-AAG---GA  
GTATGGTAATC-TTGAATCCCCTGCGTGATTGGGCTTG-ACCACTGTAACGTG-GGTCA  
TCAACGAGGAATTCCTGTATGCGCGAGTCACTATCTCGCGCAGAATCTGTCCCTGCCCT  
TTGTACACACCGCCCTGCTCTACCGATCGAACGATCAGGTAAGTGGACAGACT---  
-----GAGACTCG-C-AAG-AGTT-----TT-TGG--AAGT-CC-  
A-T-TGAACCT--C---GCC--GTTT  
>AM168086.1\_Cavenderia\_fasciculata\_SmokOW9A  
TCTAAG-TATAAGCTCTTG-TACGGCTA-GA---CTGCAGACGGCTCATT--ACAA--CG  
GTTGT-----AT---CTTACAGGGCATCCGG-GTCGCA---AGACCTTCT-GGATAACCG  
CAGTAAATCGGGGCTAATACATACAAA-CGGAGGGATGGAGAGGGC----AACCTTGAAG  
TTTCTGCGATGGACATTTA-GCTATTC--GA-CCAACCC--CG-CAA-GGGAATG--GTT  
GGAACCGGTTTCAATTTGCTAATCGACT-CTAGCTTGCTAGTAGTCTGATAAGCCCTATAG  
ACAACCGCCCTATCAACTT--GATGGTAAGGTTTTGGCTTACCATGGTTGTAACGGGTAA  
CGGGGAATCAGGGTTCGATTCCGGAGAGGACGCCTGAGAAACGGCGTCCACATCTACGGG  
TGGCAGCAGGCGCGTAAATT-GCCCAATCTCAACAGAGAGGAGGCGGTGACAATAAATCC  
CGATGGCTTTGGGGCAACCCAGG--CTAATCAGAATAAGTACACATTAATCCCTTAA  
CC-AATATAAATTGGAGGGCAAGTCTGGTGCCAGCAGCCGCGGCAATTCCAGCTCCAA-TA  
GCATATACTAATGTTGTTGCAGTAAAAACGC-TCGTAGCT----TAATATCTTTT--G  
AG-CTAC-----TATCGACTGTC---ATCCTTATGT-AG---CCGCAAGGT-GAAG  
TAGGAG-----GGCCAGT-CGGCTCAAACAC-TGTAGGTCATG-----CGGC----TAG  
CAATA-GTTG-----CATAA---TCGACTGTGCATAAA-CCTTGATGCT  
CAAGGTA--GG-CCT-TT---ATAGGGTAGATACACAGT-GCATGGCATTGTGGAACAAG  
GCAT--CTCGCGCTTAGTTGGT-GGGCC-----GCGGGGGCAATGATTAATAGGGAG  
GAGCGGGGGCCTTCATATTGCAAGGGCGAGAGGTGAAATTCGTTGACCCTTGCAAGATGTC  
CTACAGCGAAAGCATTGGCCAAGTGCCTCCCCATTAGTCAAGAACGAAAGTTTGGGGATC  
AAAGACGATCAGATACCGTCTAGTCCAAACCATAAACTATGTGACACAGCGATTAGGCG  
GGCTACCTTCTTCGAGAGCTGCCTAGCAGCTT-GTGGGAAACCAT-GAGTGCTTGGACTC  
TGGGGGGAGTATGGTTCGAAAGGCTGAAACTTAAAGGAATTGACGGAAGGGCACACCATGG  
AGTGGAG-CCTGCGGCTTAATTTGACTCAACACGGGAAAAGCTTACCAAGCTCAGATAT  
GATTAGGATTGACAGACTAA-AAGATCTTTCATGATCTCATAAGTGGTGGTGCATGGTC  
GTTCTTAGGTTGGTGGAGTGTATTTGTCAGGTCAATTCCGGTAACGGACGAGACCTCGACC  
TGCTAACTAGTGGGATTCATCTTTCG--ATTGACGAGGCAGGTATTGC-TTTGATTATA  
G-----GGGGCAACTTT-----TATAGTCGGG-TAGTGCTTGTAT-TAGTCTGGGAGAG  
TGG--GTTTCAA-AATTTAATT---AATCTTCTAGAGGTAATTCTG-GCTCTAAGCCA  
GAGG-AAGTCCGAGGCAATAACAGGCTGTGATGCCCTTAGATATCTT-GGGCCGCACGC

GTGCTACAATGTAGGCGTAATGAGTT---TATTTACATCC--ATCTCCGC-AAG---GA  
GTATGGTAATC-TTGAATCCCCTGCGTGATTGGGCTTG-ACCACTGTAACGT-GGTCA  
TCAACGAGGAATTCCTTGTATGCGCGAGTCACTATCTCGCGCAGAATCTGTCCCTGCCCT  
TTGTACACACCGCCCGTCTCTACCGATCGAACGATC-GGTAAAGTGGACAGACT---  
-----GAAACCCG-C-AAG-GGTT-----TT-TGG--AAGT-CCT

A-T-TGAACCT--C---GCC--GTTT

>HQ141516.1\_Cavenderia\_sp.\_TAS30A

TCTAAG-TATAAGCTCTTG-TACGGCTA-GA---CTGCAGACGGCTCATT--ACAA--CG  
GTTGT-----AT---CTTACAGGGCATCCGG-GTCGCA---AGACCTTCT-GGATAACCG  
CAGTAAATCGGGGCTAATACATACAAA-CGGAGGGATGGAGAGGGC----AACCTTGAAG  
TTTCTGCGATGGACATTTA-GCTATTC--GA-CCAACCC--CG-CAA-GGGAATG--GTT  
GGAACCGGTTTCATATTGCTAATCGACT-CTAGCTTGCTAGTAGTCTGATAAGCCCTATAG  
ACAACCGCCCTATCAACTT--GATGGTAAGGTTTTGGCTTACCATGGTTGTAACGGGTAA  
CGGGAATCAGGGTTCGATTTCCGGAGAGGACGCCTGAGAAAACGGCGTCCACATCTACGGG  
TGGCAGCAGGCGCTAAATT-GCCCAATCTCAACAGAGAGGAGGCGGTGACAATAAATCC  
CGATGGCTTTGGGGCAACCCAGG--CTAATCAGAATAAGTACACATTAATCCCTTAA  
CC-AATATAATTGGAGGGCAAGTCTGGTGCCAGCAGCCGCGTAATTCCAGTCCAA-TA  
GCATATACTAATGTTGTTGAGTAAAA-CGC-TCGTAGCT-----TAATATCTTTT--G  
AG-CTAC-----TATCGACTGTC---ATCCTCTTATGTAAG----CCGCAAGGTCCAAG  
TAAGAG-----GACCAGT-CGGCTCAAACAC-TGTAGGTCATG-----CGGC----TAG  
CAATA-GTTG-----CATAA---TCGACTGTGCATAAA-CCTTGATGCT  
CAAGGTA--GG-CCT-TT---ATAGGGTAGATACACAGT-GCATGGCATTGTGGAACAAG  
GCAT--CTCGCGGCTTAGTTGGT-GGGC-----GCGGGGCAATGATTAATAGGGAG  
GAGCGGGGCTTCATATTGCGAGGGCAGAGGTTGAAATTCGTTGACCCTTGCAAGATGTC  
CTACAGCGAAAGCATTGGCCAAGTGCTCCCATTAGTCAAGAACGAAAGTTGGGGATC  
AAAGACGATCAGATACCGTCTAGTCCAAACCATAAACTATGTGACCAAGCGATTAGGCG  
GGCTACCTTCTCGAGAGCTGCTAGCAGCTT-GTGGGAAACCAT-GAGTGCTTGGACTC  
TGGGGGAGTATGGTCGAAAGGCTGAAACTTAAAGGAATTGACGGAAGGGCACACCATGG  
AGTGGAG-CCTGCGGCTTAATTT-GACTCAACACGGGAAA-GCTTACCAAGCTCAGATAT  
GATTAGGATTGACAGA-CTAA-AAGATCTTTCATGATCTCATAAGTGGTGGTGCATGGTC  
GTTCTTAG-TTGGTGGAGTGAATTTGTCAGGTCAATTCCGGTAACGGACGAGACCTCGACC  
TGCTAACTAGTGGGATTCATTTTCG--ATTGACGAGGCAAGTATTGC-TTTGATTATA  
G-----GGGGCAACTTT-----TATAGTCGGG-TAGTGCTTGTAT-TAGTCTGGGAGAG  
TGG--GTTTCAA-AATTTAATT---AATCTTCTAGAGGTAATCTG-GCTCTAAGCCA  
GAGG-AAGTCCGAGGCAATAACAGGCTGTGATGCCCTTAGATATCTT-GGGCCGCACGC  
GTGCTACAATGTAGGCGCTAATGAGTT---TATTTACATCC--ATCTCCGC-AAG---GA  
GTATGGTAATC-TTGAATCCCCTGCGTGATTGGGCTTG-ACCACTGTAACGT-GGTCA  
TCAACGAGGAATTCCTTGTATGCGCGAGTCACTATCTCGCGCAGAATCTGTCCCTGCCCT  
TTGTACACACCGCCCGTCTCTACCGATCGAACGATCAGGTAAGTGGACAGACT---  
-----GAAACCCG-C-AAG-GGTT-----TT-TGG--AAGT-CC-

A-T-TGAACCT--C---GCC--GTT

>AM168080.1\_Cavenderia\_antarctica\_NZ43B

TCTAAG-TATAAGCTCTTG-TACGGCTA-GA---CTGCAGACGGCTCATT--ACAA--CG  
GTTGT-----AT---CTTACAGGGCATCCGG-GTCGCA---AGACCTTCT-GGATAACCG  
CAGTAAATCGGGGCTAATACATACAAA-CGGAGGGATGGAGAGGGC----AACCTTGAAG  
TTTCTGCGATGGACATTTA-GCTATTC--GA-CCAACCC--CG-CAA-GGGAATG--GTT  
GGAACCGGTTTCATATTGCTAATCGACT-CTAGCTTGCTAGTAGTCTGATAAGCCCTATAG  
ACAACCGCCCTATCAACTT--GATGGTAAGGTTTTGGCTTACCATGGTTGTAACGGGTAA  
CGGGAATCAGGGTTCGATTTCCGGAGAGGACGCCTGAGAAAACGGCGTCCACATCTACGGG  
TGGCAGCAGGCGCTAAATT-GCCCAATCTCAACAGAGAGGAGGCGGTGACAATAAATCC  
CGATGGCTTTGGGGCAACCCAGG--CTAATCAGAATAAGTACACATTAATCCCTTAA  
CC-AATATAATTGGAGGGCAAGTCTGGTGCCAGCAGCCGCGTAATTCCAGTCCAA-TA  
GCATATACTAATGTTGTTGAGTAAAA-CGC-TCGTAGCT-----TAATATCTTTT--G  
AG-CTAC-----TATCGACTGTC---ATCCTCTTATGTAAG----CCGCAAGGTCCAAG  
TAAGAG-----GACCAGT-CGGCTCAAACAC-TGTAGGTCATG-----CGGC----TAG  
CAATA-GTTG-----CATAA---TCGACTGTGCATAAA-CCTTGATGCT  
CAAGGTA--GG-CCT-TT---ATAGGGTAGATACACAGT-GCATGGCATTGTGGAACAAG  
GCAT--CTCGCGGCTTAGTTGGT-GGGC-----GCGGGGCAATGATTAATAGGAAG  
GAGCGGGGCTTCATATTGCGAGGGCAGAGGTTGAAATTCGTTGACCCTTGCAAGATGTC  
CTACAGCGAAAGCATTGGCCAAGTGCTCCCATTAGTCAAGAACGAAAGTTGGGGATC  
AAAGACGATCAGATACCGTCTAGTCCAAACCATAAACTATGTGACCAAGCGATTAGGCG  
GGCTACCTTCTCGAGAGCTGCTAGCAGCTT-GTGGGAAACCAT-GAGTGCTTGGACTC  
TGGGGGAGTATGGTCGAAAGGCTGAAACTTAAAGGAATTGACGGAAGGGCACACCATGG  
AGTGGAG-CCTGCGGCTTAATTT-GACTCAACACGGGAAA-GCTTACCAAGCTCAGATAT  
GATTAGGATTGACAGA-CTAA-AAGATCTTTCATGATCTCATAAGTGGTGGTGCATGGTC  
GTTCTTAG-TTGGTGGAGTGAATTTGTCAGGTCAATTCCGGTAACGGACGAGACCTCGACC  
TGCTAACTAGTGGGATTCATTTTCG--ATTGACGAGGCAAGTATTGC-TTTGATTATA  
G-----GGGGCAACTTT-----TATAGTCGGG-TAGTGCTTGTAT-TAGTCTGGGAGAG  
TGG--GTTTCAA-AATTTAATT---AATCTTCTAGAGGTAATCTG-GCTCTAAGCCA  
GAGG-AAGTCCGAGGCAATAACAGGCTGTGATGCCCTTAGATATCTT-GGGCCGCACGC  
GTGCTACAATGTAGGCGCTAATGAGTT---TATTTACATCC--ATCTCCGC-AAG---GA  
GTATGGTAATC-TTGAATCCCCTGCGTGATTGGGCTTG-ACCACTGTAACGT-GGTCA  
TCAACGAGGAATTCCTTGTATGCGCGAGTCACTATCTCGCGCAGAATCTGTCCCTGCCCT

TTGTACACGCCCGTCGCTCTACCGATCGAACGATCAGGTAAAGTGGACAGACT---  
-----GAAACCCG-C-AAG-GGTT-----TT-TGG--AAGT-CC-  
A-T-TGAACCT--C----GCC--GTTT  
>MH745571.1\_Cavenderia\_aureostabilis\_TH10B  
TCTAAG-TATAAGCTCTTG-TACGGCTA-GA---CTGCAGACGGCTCATT--ACAA--CG  
GTTGT-----AT---CTTCCAGGACATCCGG-GTCGCA---AGATCTTCT-GGATAACCG  
CAGTAAATCGGGGCTAATACATACAAA-CGAAGGGGTGGAGAGGGC----AACCTGAAG  
CTTCTGCGATGGACACTTA-GCTATTC--GA-CCAACCC--CG-CAA-GGGAGTG--GTT  
GGAACCGGTTTCATATTGCTAATCGACT-CTGGCTGCCATGAGTC-GATAAGTCTATAG  
ACAACCGCCTATCAACTT--GATGGTAAGGTTTTGGCTTACCATGGTTGTAACGGGTAA  
CGGGGAATCAGGGTTCGATTCCGGAGAGGACGCCTGAGAAAACGGCGTCCACATCTACGGG  
TGGCAGCAGGCGCGTAAATT-GCCCAATCTCAACAGAGAGGAGGCGGTGACAATAAATCC  
CGATGGCTTTGGGGCAACCCAGG--CTAATCAGAATAAGTACACATTAATCCCTTAA  
CC-AATATAATTGGAGGGCAAGTCTGGTGCCAGCAGCCGCGGTAATCCAGCTCCAA-TA  
GCATATACTAATGTTGTCAGTTAAAA-CGC-TCGTAGCT----TAATTTCTTTT--G  
AG-CTAC-----TTACGGTTGTCA--AACCTG----CGAAG----TCTTCGG-ACCTAG  
TAGGA-----ACAAC--CGGCTCAAACAC-TGTAGGTCATG-----GGC---TTAG  
CAATA-AGTT-----CATAA---TCGACTGTGCATAAA-CCTTGATGCT  
CAAGGTA--GG-CCT-TT---ATAGGTAGATACACAGT-GCATGGCATTGTGGAACAAG  
GCAT--CTCGCGCTTAGTGT-GGGCC-----GCGGGGCAATGATTAATAGGGAG  
GAGCGGGGCTTCATATTGCAGGGCGAGAGGTGAAATTCGTTGACCCTTGCAAGATGTC  
CGACAGCGAAAGCATTGGCCAAGTGCCCTCCCATAGTCAAGAACGAAAAGTTGGGGATC  
AAAGACGATCAGATACCGTCGTAGTCCAAACCATAAACTATGTCGACCAGCGATTAGGCG  
GGCTACCTTCTTCGAGAGCTGCTAGCAGCTT-GTGGGAAACCAT-GAGTGTCTGGACTC  
TGGGGGAGTATGGTCGAAGGCTGAAACTTAAAGGAATTGACGGAAGGGCACACCATGG  
AGTGGAG-CCTGCGGCTAATTT-GACTCAACACGGGAAA-GCTTACCAAGCTCAGATAT  
GATAAGGATTGACAGA-CTAA-AAGATCTTTCATGATCTCATAAGTGGTGGTGCATGGTC  
GTTCTTAG-TTGGTGGAGTGATTGTGTCAGGTCAATTCCGGTAAACGGACGACCTCGACC  
TGCTAACTAGTGGGATTCTTCTTCG--CTCGACGAGGCGGGCTCTGC-TTTTATTATG  
A-----GGG-CAACT-T----CATAGTAGGG-TAGGGTTCGTAT-TAGTCTGGGGGAG  
TGG--GTTTCAA--ATTTAATTT--AATCTTCTAGAGGTACTTCTG-GCTCTAAGCCA  
GAGG-AAGTTCGAGGCAATAACAGGTCTGTGATGCCCTTAGATATCTT-GGGCCGACGC  
GTGCTACAATGTAGGCGCTAATGAGTC---TTAATACATCC--AGCTCCGT-AAG--GA  
GTCTGGTAATC-TTGAATCCCTGCGTGATTGGGCTTG-ACTACTGTAAGTGT-GGTCA  
TCAACGAGGAATTCCTTGTATGCGCGAGTCACTATCTCGCGAGAATCTGTCCCTGCCCT  
TTGTACACACCGCCGTCGCTCTACCGATCGAACGATCAGGTAAAGTGGACAGACT---  
-----AGAGGCCG-C-AAG-GCAT-----TT-GGA--AAGT-CC-  
A-T-TGAACCT--C----GCC--GTTT  
>HQ141519.1\_Cavenderia\_macrocarpa\_MGE2  
TCTAAG-TATAAGCCCTTG-TACGGCTA-GA---CTGCAGACGGCTCATT--ACAA--CG  
GTTGC-----AT---CTTCCAGAGCATCCGG-GTCGCA---AGACCTTCT-GGATAACCG  
CAGTAAATCGGGGCTAATACATACAAA-CGGAGGGGTGGACCAGGC----AACTGGGAAA  
CTTCTGCGATGGACACTTA-GCTATTC--GA-CTGACCC--TT-TCG-GGGAATG--GTT  
GGAACCGGTTTCATATTGCTAATCGATTTGTGGCTTGCCACAAGTCTGATAAGCTCTATAG  
GCAACCGCCCTATCAACTT--GATGGTAAGGTTTTGGCTTACCATGGTTGTAACGGTAA  
CGGGGAATCAGGGTTCGATTCCGGAGAGGACGCCTGAGAAAACGGCGTCCACATCTACGGG  
TGGCAGCAGGCGCGTAAATT-GCCCAATCTCAATAGAGAGGAGGCGGTGACAATAAATCC  
CAATGACCATGGGGCAACCCCGGG--TCAATTAGAATAAGTACACATTAATACCCTAA  
CCAAATAAATTGGAGGGCAAGTCTGGTGCCAGCAGCCGCGGTAATCCAGCTCCAA-TA  
GCGTATACTAATGTTGTTGCAAGTAAAA-CGC-TCGTAGCT----AAAGATCTTGATGG  
CAAATTC-----TTGTGAAGACTCCATAGTCTCTGGGGAAA---CCCATTGTGACTTT  
TGGAC-----TTTAC--AGGC-CA-GCAA--GTAGGTAGTCTCG--GGCAT--GAGG  
GTAAC-CTTGTGTTT-----AGCGACGATCGACTGTGCATAAA-CCTTGATGCT  
CAAGGTAAACA-AAA-TC--TTCTTGAAAGATACACGGT-GCATGGCATTGTGGAATATG  
GCGTC-TTTGTGCTTGTGTTGGGAC-----ACAAGAGCAATGATTAATAGGGAG  
GAGCGGGGCTTCATATTGCCGGGCGAGAGGTGAAATTCGTTGACCCTGGCAAGATGTC  
CTACAGCGAAAGCATTGGCCAAGTGCTCTCCATTAGTCAAGAACGAAAAGTTGGGGATC  
AAAGACGATCAGATACCGTCGTAGTCCAAACCATAAACTATGTCGACCAGCGATTAGGT  
CGCCACCTTCTTCGAGAGCAACTGGCAGCTT-GTGGGAAACCAT-GAGTCTTGGACTC  
TGGGGGAGTATGGTCGAAGGCTGAAACTTAAAGGAATTGACGGAAGGGCACACCATGG  
AGTGGAG-CCTGCGGCTAATTT-GACTCAACACGGGAAA-GCTTACCAAGCTCAGATAT  
GATAAGGATTGACAGA-CCAA-AAGATCTTTCATGATCTCATAAGTGGTGGTGCATGGCC  
GTTCTTAG-TTGGTGGAGTGATTGTGTCAGGTCAATTCCGGTAAACGGACGAGACCTCGACC  
TGCTAACTAGTGGCAGTTGCTTTTCG--ATCGGCGAGGCGTCTGGGCATGGAATCTT  
A--T--AGGGGCAACTCTATGG-CTTGGGAAGTGTCCACGATGTAG-TAGTCTGGAGAGG  
CAG--CTGTCCCAA--AATAT--AATCTCTAGAGGTACTTCCA-GCTCTAAGTTG  
GAGG-AAGTTCGAGGCAATAACAGGTCTGTGATGCCCTTAGATATCTT-GGGCCGACGC  
GTGCTACAATGTAGGCGCTAATAAGAAAAACATTT-TATCCCGGCACCGCCAAG--GT  
GTCCGGTAATC-CA-CAATCACCTGCGTGATTGGGATTG-GTCACTGTAAGTGT-GACCA  
TCAACGAGGAATTCCTTGTATGCCGCGGTCATATCCCGCGCAGAATCTGTCCCTGCCCT  
TTGTACACACCGCCGTCGCTCTACCGATCGAACGGAAGTAAAGTGGACAGACA---  
-----G-T-CCCT-C-T-T-TATTG-AGGA----GC-TGA--AAGT-CC-  
A-T-TGAACCT--C----GTC--GTT-

>AM168091.1\_Cavenderia\_parvispora\_OS126

TCTAAG-TATAAGCCCTAG-TACGGCTA-GA---CTGCAGACGGCTCATT--ACAA--CG  
GTTGC-----AG---CTTACAGAGCATCCGG-GTCGCA---AGACCTTCT-GGATAACCG  
CAGTAAATCGGGGCTAATACATACAAA-CGGAGGGGCGGAGCGGGC----AACCGGAAG  
CTTCTGCGATGGACACTTA-GCTATT--GA-CTGACCC--CT-CAC-GGGAATG--GTT  
GGAACCGGTTCCATATTGCTAATCGACTTGTGGCTTGCCTCAAGTCTGATAAGCTCTATAG  
GCAACCGCCCTATCAACTT--GATGGTAAGGTATTGGCTTACCATGGTTGTAACGGGTAA  
CGGGGAATCAGGGTTCGATTCCGGAGAGGACGCCTGAGAAACGGCGTCCACATCTACGGG  
TGGCAGCAGGGCGCTAAATT-GCCCAATCTCAATAGAGAGGAGGCGGTGACAATAAATCC  
CGATGGCCATGGGGGCAACCCCGGG--CCAATCAGAATAAGTACACATTAATACCCTAA  
CC-AATATAAATTGGAGGGCAAGTCTGGTGCCAGCAGCCGCGTAATTCCAGCTCCAA-TA  
GCGTATACTAATGTTGTTGCAGTTAAAA-CGC-TCGTAGCT----GAACAACCTTGATGG  
CAAATTC-----AGGTCAATGTGGCACGTCCATGGGGGAAA---CCTCTATGCGGCAG  
TGTC-----TTGAC--CGGC-TAAGCAG--GTAGGTAGTTTGG--CGTGT--GTAG  
TAATA-CATGCGTCA-----GGCGA---TCGACTGTGCATAAA-CCTTGATGCT  
CAAGGTAAAGA-CGA-CTC--TAGTCAAAGATACGCAGT-GCATGGCATTGTGGAACAAG  
GCGA--TCCGTAGCTTGGTTGGT-GAGCT-----ACGGGTGCAATGATTAATAGGGAG  
GAGCGGGGGCTTCATATTGCCGGGCGAGAGGTGAAATTCGTTGACCCTGGCAAGATGTC  
CTACAGCGAAAGCATTGGCCAAGTGCCTCTCCATTAGTCAAGAACGAAAGTTGGGGATC  
AAAGACGATCAGATACCGTCTAGTCCAAACCATAAACTATGTCGACCAGCGATTAGGT  
CGCCACCTTCTCGAGAGCAACCTGGCAGCTT-GTGGGAAACCAT-GAGTTCTTGACTC  
TGGGGGGAGTATGGTGCAGAGGCTGAAACTTAAAGGAATTGACGGAAGGGCACACCATGG  
AGTGGAG-CCTGCGGCTTAATTT-GACTCAACACGGGAAA-GCTTACCAAGCTCAGATAT  
GATAAGGATTGACAGA-CCAA-AAGATCTTTCATGATCTCATAAGTGGTGGTGCATGGCC  
GTTCTTAG-TTGGTGGAGTGATTTGTCAGGTCAATTCCGGTAACGGACGAGACCTCGACC  
TGCTAACTAGTAGCAGTTGCTTTTTCG--CTCGGCGAGGCGTTTTGGGCGTGGAACCTTG  
A--T--AGGGGCAACTCTATC--TTTGGGAAACGAACGAGGCGTAG-TAGTCTGGAGAGG  
CAG--CTGTTCCCATATTAATAAAT---AATCTTCCCTAGAGGTACTTCCA-GCTCTAAGTTG  
GAAG-AAGTCCGAGGCAATAACAGGTCTGTGATGCCCTTAAATATCTT-GGGCCGCACGC  
GTGCTACAATGTAGGCGCTAATGAGTCGT-TCTTAATATCC--GGCACCGC-AAG--GT  
GTCTGGTAATC-CC-CAATCCCCTGCGTGATTGGGATTG-GTCACTGTAAGTGT-GACCA  
TCAACGAGGAATTCCTGTATGCGCGGGTCACTATCCCGCGCAGAATCTGTCCCTGCCCT  
TTGTACACACCGCCCGTCTCTACCGATCGAACGTAAGGTAAAGTGGACGGACA---  
-----GCTGTCTC-C-ACG-GATG-----GC-TGG--AAGT-CC-

A-T-TGAACCT--C---GTC--GTTT

>HQ141521.1\_Cavenderia\_amphispora\_BM9A

TCTAAG-TATAAGCCCTAG-TACGGCTA-GA---CTGCAGACGGCTCATT--ACAA--CG  
GTTGC-----AG---CTTACAGAGCATCCGG-GTCGCA---AGACCTTCT-GGATAACCG  
CAGTAAATCGGGGCTAATACATACAAA-CGGAGGGGCGGAGCGGGC----AACCGGAAG  
CTTCTGCGATGGACACTTA-GCTATT--GA-CTGACCC--CT-CAC-GGGAATG--GTT  
GGAACCGGTTCCATATTGCTAATCGACTTGTGGCTTACCATGGTTGTAACGGGTAA  
GCAACCGCCCTATCAACTT--GATGGTAAGGTATTGGCTTACCATGGTTGTAACGGGTAA  
CGGGGAATCAGGGTTCGATTCCGGAGAGGACGCCTGAGAAACGGCGTCCACATCTACGGG  
TGGCAGCAGGGCGCTAAATT-GCCCAATCTCAATAGAGAGGAGGCGGTGACAATAAATCC  
CGATGGCCATGGGGGCAACCCCGGG--CCAATCAGAATAAGTACACATTAATACCCTAA  
CC-AATATAAATTGGAGGGCAAGTCTGGTGCCAGCAGCCGCGTAATTCCAGCTCCAA-TA  
GCGTATACTAATGTTGTTGCAGTTAAAA-CGC-TCGTAGCT----GAACAACCTTGATGG  
CAAATTC-----AGGTCAATGTGGCACGTCCATGGGGGAAA---CCTTTATGCGGCAG  
TGTC-----TTGAC--CGGC-TAAGCAG--GTAGGTAGTTTGG--CGTGT--GTAG  
CAATA-CATGCGTCA-----GGCGA---TCGACTGTGCATAAA-CCTTGATGCT  
CAAGGTAAAGA-CGA-CTC--TAGTCAAAGATACGCAGT-GCATGGCATTGTGGAACAAG  
GCGA--TCCGTAGCTTGGTTGGT-GAGCT-----ACGGGTGCAATGATTAATAGGGAG  
GAGCGGGGGCTTCATATTGCCGGGCGAGAGGTGAAATTCGTTGACCCTGGCAAGATGTC  
CTACAGCGAAAGCATTGGCCAAGTGCCTCTCCATTAGTCAAGAACGAAAGTTGGGGATC  
AAAGACGATCAGATACCGTCTAGTCCAAACCATAAACTATGTCGACCAGCGATTAGGT  
CGCCACCTTCTCGAGAGCAACCTGGCAGCTT-GTGGGAAACCAT-GAGTTCTTGACTC  
TGGGGGGAGTATGGTGCAGAGGCTGAAACTTAAAGGAATTGACGGAAGGGCACACCATGG  
AGTGGAG-CCTGCGGCTAATTT-GACTCAACACGGGAAA-GCTTACCAAGCTCAGATAT  
GATAAGGATTGACAGA-CCAA-AAGATCTTTCATGATCTCATAAGTGGTGGTGCATGGCC  
GTTCTTAG-TTGGTGGAGTGATTTGTCAGGTCAATTCCGGTAACGGACGAGACCTCGACC  
TGCTAACTAGTGGCAGTTGCTTTTTCG--CTCGGCGAGGCGTTTTGGGCGTGGAACCTTG  
A--T--AGGGGCAACTCTATC--TTTGGGAAACGAACGAGGC-TAG-TAGTCTGGAGAGG  
CAG--CTGTCCCATATTAATAAAT---AATCTTCCCTAGAGGTACTTCCA-GCTCTAAGTTG  
GAGG-AAGTCCGAGGCAATAACAGGTCTGTGATGCCCTTAGATATCTT-GGGCCGCACGC  
GTGCTACAATGTAGGCGCTAATGAGTCGT-TCTTAATATCCC-GGCACCGCCAAG--GT  
GTCTGGTAATC-CC-CAATCCCCTGCGTGATTGGGATTG-GTCACTGTAAGTGT-GACCA  
TCAACGAGGAATTCCTGTATGCGCGGGTCACTATCCCGCGCAGAATCTGTCCCTGCCCT  
TTGTACACACCGCCCGTCTCTACCGATCGAACGTAAGGTAAAGTGGACGGACA---  
-----GCTGTCTTC-ACG-GATG-----GC-TGG--AAGT-CCC

A-T-TGAACCT--C---GTC--GTTT

>AM168090.1\_Cavenderia\_microspora\_TNS\_C\_38

TCTAAG-TATAAGCCCTAG-TACGGCTA-GA---CTGCAGACGGCTCATT--ACAA--CG  
GTTGC-----AG---CTTACAGAGCATCCGG-GTCGCA---AGACCTTCT-GGATAACCG

CAGTAAATCGGGGGCTAATACATACAAA-CGGAGGGGCGGAGCGGGC----AACCGCGAAG  
CTTCTGCGATGGACACTTA-GCTATTC--GA-CTGACCC--CT-CAC-GGGAATG--GTT  
GGAACCGGTTTCATATTGCTAATCGACTTGTGGCTTGCCCAAGTCTGATAAGCTCTATAG  
GCAACCGCCCTATCAACTT--GATGGTAAGGTATTGGCTTACCATGGTTGTAACGGGTAA  
CGGGGAATCAGGGTTCGATTCCGGAGAGGACGCCTGAGAAACGGCGTCCACATCTACGGG  
TGGCAGCAGGCGGTAAAT--GCCAATCTCAATAGAGAGGAGGCGGTGACAATAAATCC  
CGATGGCCATGGGGGCAACCCCGG--CCAATCAGAATAAGTACACATTAATACCCTAA  
CC-AATATAATTGGAGGGCAAGTCTGGTGCCAGCAGCCGCGTAATTCCAGCTCCAA-TA  
GCGTATACTAATGTTGTTGCAAGTAAAA-CGC-TCGTAGCT----GAACAACCTTGATGG  
CAAATTC-----AGGTCAATGTGCCACGTCCATGGGGGGAAA---CCTTTATGCGGCAG  
TGTCC-----TTGAC--CGGC-TAAGCAG--GTAGGTAGTTTGG--CG-GT--GTAG  
CAATA-CAT-CGTCA-----GGCGA---TCGACTGTGCATAAA-CCTTGATGCT  
CAAGGTAAAGA-CGA-TTC--TAGTCAAAGATACGCAGT-GCATGGCATTGTGGAACAAG  
GCGA--TCCGTAGCTTGGTTGGT-GAGCT-----ACGGGTGCAATGATTAATAGGGAG  
GAGCGGGGGCCTTCATATTGCCGGGCGAGAGGTGAAATTCGTTGACCCTGGCAAGATGTC  
CTACAGCGAAAGCATTGGCCAAGTGCCCTCTCCATTAGTCAAGAACGAAAAGTTTGGGGATC  
AAAGACGATCAGATACCGTCGTAGTCCAAACCATAAACTATGTCGACCAGCGATTAGGT  
CGCCACCTTCTTCGAGAGCAACCTGGCAGCTT-GTGGGAAACCAT-GAGTTCTTGACTC  
TGGGGGAGTATGGTCGAAGGCTGAACTTAAAGGAATTGACGGAAGGGCACACCATGG  
AGTGGAG-CCTGCGCTTAATTT-GACTCAACACGGGAAA-GCTTACCAAGCTCAGATAT  
GATAAGGATTGACAGA-CCAA-AAGATCTTTCATGATCTCATAAGTGGTGGTGCATGGCC  
GTTCTTAG-TTGGTGGAGTGTATTGTCAGGTCAATTCGGTAACGGACGAGACCTCGACC  
TGCTAACTAGTGGCAGTTGCTTTTCG--CTCGGCGAGGCGTTTTGGGCGTGGAACTTTG  
G--T--AGGGGCAACTATC--TTTGGGAAGCGAACGAGGCGTAG-TAGTCTGGAGAGG  
CAG--CTGTCCCATATTAATAAT---AATCTTCTAGAGGTAAGTCCA-GCTCTAAGTTG  
GAGG-AAGTCCGAGGCAATAACAGGTCTGTGATGCCCTTAGATATCTT-GGGCCGCACGC  
GTGCTACAATGTAGGCGCTAATGAGTCGT-TCTTAATATCC--GGCACCGC-AAG--GT  
GTCTGGTAATC-CC-CAATCCCTGCGTATTGGGATTG-GTCACTGTAAGTGT-GACCA  
TCAACGAGGAATTCCTTGTATGCGGGGCTACTATCCCAGCAGAATCTGTCCCTGCCCT  
TTGTACACACCGCCGTCGTCTTACCAGTGAACGGTAAGGTAAGTGGACGGACA---  
-----GCTGTCTC-C-ACG-GATG-----GC-TGG--AAGT-CC-

A-T-TGAACCTG-C----GTC--GTTT  
>HQ141520.1 Cavenderia boomerangispora K26B

TCTAAG-TATAAGCCCTTG-TACGGCTA-GA---CTGCAGACGGCTCATT--ACAA--CG  
GTTGT----AG---CTTACAGAGCATCCGG-G-CGCA---AG-CCTTCT-GGATAACCG  
CAGTAAATCGGGGCTAATACATACAAA-CGGAGGGGTGGAGCGGGC----AACCGCAAAG  
CTTCTGCGATGGACACTTA-GCTATTC--GA-CTAACC---T--AC-GGGTCAG--GTT  
GGAACCGGTTTCATATTGCCAATCGACT-ATGGCTTGCCATA-GTCTGATAAGCTCTATAG  
ACAACCGCCCTATCAACTT--GATGGTAAGGTATTGGCTTACCATGGTTGTAACGGGTAA  
CGGGGAATCAGGGTTCGATTCCGGAGAGGACGCCTGAGAAACGGCGTCCACATCTACGGG  
TGGCAGCAGGCGCGTAAAT--GCCAATCTCAATAGAGAGGAGGCGGCGACAATAAATCC  
CGATGGCTATGGGGGCAACCCCGG--CCAATCAGAATAAGTACACAATAAATACCCTAA  
CC-AATATAATTGGAGGGCAAGTCTGGTGCCAGCAGCCGCGTAATTCCAGCTCCAA-TA  
GCATATACTAACGTTGTTGCAAGTAAAA-CGC-TCGTAGCT----GAACAACCTTGATGG  
CAAATTC-----AGGGCAGTGTCAAGAGTAC-TGGGGTCAAA---CCTT--GGATACAT  
CTTGC-----CTGTC--CGGC-CAAGCAA--GTAGGTAGTTTGG--AGTA---GGGG  
CAACT-C-TGCTTCA-----GGCGA---TCGACTGTGCATAAA-CCTTGATGCT  
CAAGGTAAAGA-CGA-CTC--TAGTCAAAGATACGCAGT-GCATGGCATTGTGGAACAAG  
GCGA--TCCGTAGCTTAGTTAGT-GGGCT-----GCGGGTGAATGATTAATAGGGAG  
GAGCGGGGGCCTTCATATTGCCGGGCGAGAGGTGAAATTCGTTGACCCTGGCAAGATGTC  
CTACAGCGAAAGCATTGGCCAAGTGCCCTCTCCATTAGTCAAGAACGAAAAGTTTGGGGATC  
AAAGACGATCAGATACCGTCGTAGTCCAAACCATAAAGATGTCGACCAGCGATTAGGT  
CGCCACCTTCTTCGAGAGCAACCTGGCAGCTT-GTGGGAAACCAT-GAGTTCTTGACTC  
TGGGGGAGTATGGTCGAAGGCTGAACTTAAAGGAATTGACGGAAGGGCACACCATGG  
AGTGGAG-CCTGCGCTTAATTT-GACTCAACACGGGAAA-GCTTACCAAGCTCAGATAT  
GATAAGGATTGACAGA-CCAA-TAGATCTTTCATGATCT-----

-----  
-----  
-----  
-----  
-----  
-----  
-----  
-----  
-----  
-----  
-----

>AM168085.1 Cavenderia exigua TNS\_C\_199  
TCTAAG-TATAAGCCCTTG-TACGGCTA-GA---CTGCAGACGGCTCATT--ACAA--CG  
GTTGT----AG---CTTACAGAGCATCCGG-G-CGCA---AG-CCTTCT-GGATAACCG  
CAGTAAATCGGGGCTAATACATACAAA-CGGAGGGGTGGAGCGGGC----AACCGCAAAG  
CTTCTGCGATGGACACTTA-GCTATTC--GA-CTAACC---TT---C-GGGTCAG--GTT  
GGAACCGGTTTCATATTGCCAATCGACT-ATGGCTTGCCATA-GTCTGATAAGCTCTATAG



ACAACCCGCCCTATCAACTT--GATGGTAAGGTATTGGCTTACCATGGTTGTAACGGGTAA  
CGGGGAATCAGGGTTCGATTCCGGAGAGGACGCCTGAGAAACGGCGTCCACATCTACGGG  
TGGCAGCAGGCGCGTAAATT--GCCAATCTCAATAGAGAGGAGGGCGGCGACAATAAATCC  
CGATGGCTATGGGGCAACCCCGGG--CCAATCAGAATAAGTACACAATAAATACCTAA  
CC-AATATAATTGGAGGGCAGGTCTGGTGCCAGCAGCCGCGGTAATTCCAGCTCCAA-TA  
GCATATACTAACGTTGTCAGTTAAAA-CGC-TCGTAGCT----GAACAACCTTGATGG  
CAAATTC-----AGGGCT-TGTCACGAGTAC-CGCCTTAAAA---C-----GGATACAT  
CGTGC-----TTGTC--CGGC-CAAGCAA--GTAGGTAGTTTGA--TGT----GAGG  
CAACT-C--GCGTCA-----GGCGA---TCGACTGTGCATAAA-CCTTGATGCT  
TAAGGTAAGA-CGA-TTC--TAGTCAAAGATACGCAGT-GCATGGCATTGTGGAACAAG  
GCGA--TCCGTAGCTTAGTTAGT-GGGCT-----GCGGGTGCAATGATTAATAGGGAG  
GAGCGGGGGCCTTCATATTGCCGGGCGAGAGGTGAAATTCGTTGACCCTGGCAAGATGTC  
CTACAGCGAAAGCATTGGCCAAGTGCCCTCTCCATTAGTCAAGAACGAAAAGTTTGGGGATC  
AAAGACGATCAGATACCGTCTAGTCCAGACCATAAACGATGTGCGACCAGCGATTAGGT  
CGCCACCTTCTCGAGCAACTGGCAGCTT-GTGGGAAACCAT-GAGTCTTGACTC  
TGGGGGGAGTATGGTCGCAAGGCTGAAACTTAAAGGAATTGACGGAAGGGCACACCATGG  
AGTGGAG-CCTGCGGCTTAATTT-GACTCAACACGGGAAA-GCTTACCAAGCTCAGATAT  
GATAAGGATTGACAGA-CCAA-TAGATCTTTCATGATCTCATAAAGTGGTGGTGCATGGCC  
GTTCTTAG-TTGGTGGAGTATTGTCAGGTCAATCCGGTAACGGACGAGACCTCGACC  
TGCTAACTAGTGGCAGTTGCTTTTTCG--CTCGGCGAGGCGTATTGGCATAACGACTTTG  
G--T--AGGGGCAACTCTATC--TTGGAAGTGTGACAGCGCGTAG-TAGTCTGGAGAGG  
CAG--CTGTCCCAA---TAATT---AATCTTCTAGAGGTACTTCCA-GCTCTAAGCTG  
GAGG-AAGTCCGAGGCAATAACAGGTCTGTGATGCCCTTAGATATCTT-GGGCCGCACGC  
GTGCTACAATGTAGGCGTAATATGATAT-CCCAATTACCC--GGCACCTCAAAG---GT  
GTC-GGTAATC-TC-CAATCACCTGCGTGATTGGGCTTG-GTCACTGTAAGTGT-GACCA  
TTAACGAGGAATTCCTTGTATACGCGAGTCACTATCTCGCATAGAATCTGTCCCTGCCCT  
TTGTACACACCGCCGTCGCTCTACCGATCGAACGGTAAGGTAAGGTAAGTGGACAGA----  
-----CCG--CC-GCCCT-C-ATC-GGTA-----GC-TGG--AAGT-CC-  
A-T-TGAACCT--C-----TTC-GTTT

>AM168110.1 *Acytostelium subglobosum*\_LB1

TCTAAG-TATAAACCTCTA-TATGGTGA---CTGCAGACGGCTCA-TT-ACAA--CA  
--GT---GATAAACTA-CAAGACTTTCGC-GCTTC-----GGCGTTAT-GGATAACCG  
CAGTAAATCGGGGCTAATACATATAAAA-CG-AAAGA-CGAGCAAG----CAATTGCG-AG  
TTCTTGGCATTTTT---A-GCTACTA---A---A-ATCGACCCTTTT--AGGTCGTGT  
GAAACCGAAAAATATTGCTGATCGAGA-----ATT-T---CTCGACAAGTCTTATGT  
GTCACTGCCATCAACT--CGATGGTACGGTATTGGCCTACCATTGGTTGCAACGGGTAA  
CGGGGAATTAGGGTTCGATTCCGGAGAGGGAGCCTGAGAAAATGGCTGCCACTTCTACGGA  
AGGCAGCAGGCGCGCAAATT-ACTCAATTCGATAC-GGAGAAGTAGTGACAATAAATAC  
AAATGCTTTTCAATTT-TTTTGAGA--GCAATTTGAATAAGTACAACTTAAATCGCTTAG  
CT-AAAGTGATTGGAGGCAAGTCTGGTGCCAGCAGCCGCGGTAATTCCAGCTCCAA-TA  
CGGTATACTAAAATTTGTCAGTTAAAA-CGC-TCGTAGTTAAAGTAAAGGTTACTTG-G  
AT-AAAC---AAGAATAATTTTTTTA--GAATTATT-----T-----AACGAATTT-  
----TAAATTTTTCAT-AGTTAAATTTTCA-CCAAGTTC-CTTATTTTGG-ACT---  
----TAAAAATTTATT-----TTTTT-GTCTAGTCTACTGTGAGAAAA-TTGTAGTGT  
TAAAGCA--AG-C---T---ATCAGCTTGATCAATGCAGCATGGTATAGAAAAATAG  
ACAC---TAAGTATTTTGTGGTTT-AATA---C-TCTAGTGAATGATTAATAGGGAA  
TGGCGGGGCCGTTTCGATTGATGGGCGAGAGGTGAAATTCGTTGACCCTATCAAGACGTA  
CAACAGCGAAAGCATTTCGCAAGTATTTTCCATTAATCAAGAACGAAAAGTTTGGGGATC  
GAAGACGATCAGATACCGTCTAGTCCAAACCATAAACAATGTGCGACCAGGATTGGACG  
GAATTT-TTTTAAAAAACTCGCTCAGAACCTT-GTGAGAAATCAT-GAGTGTGTTGGACTC  
TGGGGGGAGTATGGTCGCAAGTCTGAAACTTAAAGGAATTGACGGAAGGGCACACAATGG  
AGTGGAA-CCTGCGGCTTAATTT-GACTCAACTCGGGAAA-ACTTACCAAGCTCAGATAT  
AATAAGGATTGACAGA-CTAA-AAGATCTTTCATGATTGTATAAGTGGTGGTGCATGGTC  
GTTCTTAG-TTGGTGGAGTATTGTTCTGGTCAATTCCGATAACGGACGAGACGTCTACT  
TGCTAACTAGTAAAATTAATTTTTTCGC-TCGGG-GATAGTTAGT-TTGTATTGATCTTT  
ATCA--T-CGAA--GGT-G---GTAATTTTCGATAGATTGATGTGTACCTTGGAAAAA  
TAA--ATTTTTTCATAAACATTA---AA-CTTCTTAGAAGGACTACCT-ACCTCAAGTGG  
GGGG-AAGTCGGACGCAATAACAGGTCTGTGATGCCCTTAGATACCTT-GGGCTGCACGC  
GCGTTACAATGTAGAAAAGAAAAAGGC----TTCC-----GGAGCCGT-AAG---G-  
CTCTGGTAATCATATGAATTTTCTACGTAATAGGGATTG-ATCTTTGTAATTATCGATCA  
TAAACGAGGAATTCCTTGAAGCGTAAATCATTACTTTACGCTGAATATGTCCCTGCCCT  
TTGTACACACCGCCGTCGCTCCTACCGATCGAACGATTAGGTAATAAATGACGGACTT--  
-TGACATA-CTA--G-----AA-A-TAG-CTTGT-----TTTT-G-A--AAG-TTA  
T-T-TAAATCT--C---ATT--GTTT

>HQ141510.1 *Acytostelium amazonicum landolt*\_X

TCTAAG-TATAAACCTCTA-TATGGTGAAC---CTGCAGAAGGATCAACT-ACAA--CA  
--TGT---GATAAACTA-CAAGACTTTCGC-GCTTC-----GGCGTTAT-GGATAACCG  
CAGTAAATCGGGGCTAATACATATAAAA-CG-AAAGA-CGAGCAAG----CAATTGCG-AG  
TTCTTGGCATTTTT---A-GCTACTA---A---A-ATCGACCCTTTT--AGGTCGTGT  
GAAACCGAAAAATATTGCTGATCGAGA-----ATT-T---CTCGACAAGTCTTATGT  
GTCACTGCCATCAACT--CGATGGTACGGTATTGGCCTACCATTGGTTGCAACGGGTAA  
CGGGGAATTAGGGTTCGATTCCGGAGAGGGAGCCTGAGAAAATGGCTGCCACTTCTACGGA  
AGGCAGCAGGCGCGCAAATT-ACTCAATTCGATAC-GGAGAAGTAGTGACAATAAATAC

AAATGCTTTTCAATTT-TTTTGAGA--GCAATTTGAATAAGTACAACCTTAAATCGCTTAG  
CT-AAAGTGATTGGAGGGCAAGTCTGGTGCCAGCAGCCGCGTAATCCAGCTCAA-TA  
CGGTATACTAAATTTGTTGCAAGTAAAA-CGC-TCGTAGTTAAAGTAAAGGTTACTTG-G  
AT-AAAC----AAGAATAATTTTTTTA--GAATTATT-----T-----AACGAATTT-  
----TTAATTTTTCAT-AGTTAAATTTTCA-CCAAGTTC-CTTATTTTGG-ACT---  
----TAAAAATTTATT-----TTTTT-GTCTAGTCTACTGTGAGAAAA-TTGTAGTGT  
TAAAGCA--AG-C----T----ATCAGCTTGATCAATGCAGCATGGTATAGAAAAATATG  
ACAC---TAAGTATTTTGTGGT-TAATA----C-TCTAGTGAATGATTAATAGGGAA  
TGGCGGGGCCGTTTCGATTGATGGGCGAGAGGTGAAATTCGTTGACCCTATCAAGACGTA  
CAACAGCGAAAGCATTTCGCAAGTATTTCTCCATTAATCAAGAACGAAAGTTGGGGATC  
GAAAGCATCAGATACCGTCTAGTCCAAACCATAAAACAATGTCGACCAGGGATTGGACG  
GAATTT-TTTTAAAAAACTCGCTCAGAACCTT-GTGAGAAATCAT-GAGTGTGGACTC  
TGGGGGGAGTATGGTTCGCAAGTCTGAACTTAAAGGAATTGACGGAAGGGCACACAATGG  
AGTGGAA-CCTGCGGCTTAATTT-GACTCAACTCGGGAAA-ACTTACCAAGCTCAGATAT  
AATAAGGATTGACAGA-CTAA-AAGATCTTTCATGATTGTATAAGTGGTGGTGCATGGTC  
GTTCTTAG-TTGGTGGAGTGATTTGTCTGGTCAATTCCGATAACGGACGAGACGTCTACT  
TGCTAACTAGTAAAATTAATTTTTTCGC-TCGGG-GATAGTTAGT-TTGTATTGATCTTT  
ATCA--T-CGCA--GGT-G---GTAATTTTCGTATAGATTGATGTGTACCTTGGAAAAA  
TAA--ATTTTTTCATAAACATTA---AA-CTTCTTAGAAGGACTACCT-ACCTCAAGTGG  
GGGG-AAGTCGGACGCAATAACAGGTCTGTGATGCCCTTAGATACCTT-GGGCTGCACGC  
GCGTTACAATGTAGAAAAGAAAAAGGC----TTCC-----GGAGCCGT-AAG---G-  
CTCTGGTAATCATATGAATTTTCTACGTAATAGGGATTG-ATCTTTGTAATTATCGATCA  
TAAACGAGGAATTCCTGTAAAGCGTAAATCATTACTTTACGCTGAATATGTCCTGCCCT  
TTGTACACACCGCCGCTCCTACCGATCGAACGATTAGGTAATAATTGACGGACTT--  
-TGAC-TAACTC--A-----TG-A-GAT-ATGTAT-----GCCTGGGTGAACC--TG  
C-AG-AAGGAT--C---A--C---C-

>HQ141513.1\_Acytostelium\_magnisorum\_08A

TCTAAG-TATAAACCTCTA-TATGGTGAAC----CTGCAGAAGGATCAACT-ACGAG-CA  
--TGT----GATAAACTA-CAAGACTTTCGC-GCTTC-----GGCGTTAT-GGATAACCG  
CAGTAAATCGGGGCTAATACATATAAA-CG-AAAGA-CGAGCAAG----CAATTGCG-AG  
TTCTTGGGATTTT---A-GCTACTA---A--A-ATCGACCCTTTT--AGGTGCTGTT  
GAAACCGAAAAATATTGCTGATCGAGA-----ATT-T---CTCGACAAGTCTTATGT  
GTCACTGCCCTATCAACT--CGATGGTACGGTATTGGCCTACCATGGTTGCAACGGGTAA  
CGGGGAATTAGGGTTCGATTCCGGAGAGGGAGCCTGAGAAATGGCTGCCACTTATACGGA  
AGGCAGCAGGCGCGCAAATT-ACTCAATTCGATAC-GGAGAAAGTAGTGACAATAAATAC  
AAATGCTTTTCAATTT-TTTTGAGA--GCAATTTGAATAAGTACAACCTTAAATCGCTTAG  
CT-AAAGTGATTGGAGGGCAAGTCTGGTGCCAGCAGCCGCGTAATTCAGCTCAA-TA  
GCGTATACTAAATTTGTTGCAAGTAAAA-CGC-TCGTAGTTAAAGTAAAGGTTACTTG-G  
AT-AAAC----AAGAATAATTTTTTTA--GAATTATT-----T-----AACGAATTT-  
----TTAATTTTTCAT-AGTTAAATTTTCA-CCAAGTTC-CTTATTTTGG-ACT---  
----TAAAAATTTATT-----TTTTT-GTCTAGTCTACTGTGAGAAAA-TTGTAGTGT  
TAAAGCA--AG-C----T----ATCAGCTTGATCAATGCAGCATGGTATAGAAAAATATG  
ACAC---TAAGTATTTTGTGGT-TAATA----C-TCTAGTGAATGATTAATAGGGAA  
TGGCGGGGCCGTTTCGATTGATGGGCGAGAGGTGAAATTCGTTGACCCTATCAAGACGTA  
CAACAGCGAAAGCATTTCGCAAGTATTTCTCCATTAATCAAGAACGAAAGTTGGGGATC  
GAAGACGATCAGATACCGTCTAGTCCAAACCATAAAACAATGTCGACCAGGGATTGGACG  
GAATTT-TTTTAAAAAACTCGCTCAGAACCTT-GTGAGAAATCAT-GAGTGTGGACTC  
TGGGGGGAGTATGGTTCGCAAGTCTGAACTTAAAGGAATTGACGGAAGGGCACACAATGG  
AGTGGAA-CCTGCGGCTTAATTT-GACTCAACTCGGGAAA-ACTTACCAAGCTCAGATAT  
AATAAGGATTGACAGA-CTAA-AAGATCTTTCATGATTGTATAAGTGGTGGTGCATGGTC  
GTTCTTAG-TTGGTGGAGTGATTTGTCTGGTCAATTCCGATAACGGACGAGACGTCTACT  
TGCTAACTAGTAAAATTAATTTTTTCGC-TCGGG-GATAGTTAGT-TTGTATTGATCTTT  
ATCA--T-CGCA--TGT-G---GTAATTTTCGTATAGATTGATGTGTACCTTGGAAAAA  
TAA--ATTTTTTCATAAACATTA---AA-CTTCTTAGAATGACTACCT-ACCTCAAGTGG  
GGGG-AAGTCGGACGCAATAACAGGTCTGTGATGCCCTTAGATACCTT-GGGCTGCACGC  
GCGTTACAATGTATAAAAGAAAAAGGC----TTCC-----GGAGCCGT-AAG---G-  
CTCTGGTAATCATATGAATTTTCTACGTAATAGGGATTG-ATCTTTGTAATTATCGATCA  
TAAACGAGGAATTCCTGTAAAGCGTAAATCATTACTTTACGCTGAATATGTCCTGCCCT  
TTGTACACACCGCCGCTCCTACCGATCGAACGATTAGGTAATAATTGACGGACGG--  
-TGA---ACCTG--C-----AG-A-AGG-AT--C-----ATTT--GACT-AACCA-TG  
--AGTT--GAT--C-----CTGCC-

>HQ141511.1\_Acytostelium\_amazonicum\_HN1B1

TCTAAG-TATAAACCTTTA-TACGGTGAAC----CTGCAGAAGGATCAAT--ACAA--CA  
--TGT----GATAAACTA-CAAGACTTTCGC-GCTTC-----GGCGTTTT-GGATAACCG  
CAGTAAATCGGGGCTAATACATATAAA-CG-AAAGG-CGAGCAAG----TAATTGCG-AG  
TCCTTGGGATTGTT---A-GCCATT---T---A-ACCGACCCTTIG-AGGTTGTGT  
GAACCCGAACAATATTGCTGATCGAGA-----ATT-TATTCTCGACAAGTCTTATGT  
GTCACTGCCCTATCAACT--CGATGGTACGGTATTGGCCTACCATGGTTGCAACGGGTAA  
CGGGGAATCAGGGTTCGATTCCGGAGAGGGAGCCTGAGAAATGGCTGCCACTTCTACGGA  
AGGCAGCAGGCGCGCAAATT-ACTCAATCCCAATAC-GGGGAAGTAGTGACAATAAATAC  
AAATGCCCTTTCCATTT-TATGGAGG--GCAATTTGAATAAGTACAATCTAAATCGCTTAG  
CC-AAAGTGATTGGAGGGCAAGTCTGGTGCCAGCAGCCGCGTAATTCAGCTCAA-TA  
GCGTATACTAAATTTGTTGCAAGTAAAA-CGC-TCGTAGTTAAGTAGAAATTATTG-G

AG-AA-T-----AGAAGGA-TCCTTTTAAAGGTCACCT-----T-----AAAG-ACAC-  
----TTTTCCACTTA-GT-GGTCAAGTTGTCA-CCAAATAT-TTCTTTAAGGGCAAT---  
----GGAATTTTTATT-----CATTT-GCCTTGCTACTGTGAGAAAA-TTGCAGTGTT  
CAAAGCA--AG-C---G---TAAAGCTTGATCAATGCAGCATGGTATAGAGAAACACG  
ACAC---TAAATATTTTGTGGTT--AATA-----TTCTAGTGTAATGGTTAATAGGGAA  
TGGCGGGGCCGTTTCGATTGATGGGCGAGAGGTGAAATTCGTTGACCCTATCAAGACGTA  
CAACAGCGAAAAGCATTTCGGCAAGTAATTCTCCATTAATCAAGAACGAAAAGTTTGGGGAT  
GAAGACGATCAGATACCGTCGTAGTCCAAACTATAAACTATGTGACACAGGGATTGGACG  
GATCCT-TTTTTAAAAACCCGCTCAGAACCTT-GTGGGAAACCAT-GAGTGTTGGACTC  
TGGGGGGAGTATGGTTCGCAAGTCTGAACTTAAAGGAATTGACGGAAGGGCACACAATGG  
AGTGGAA-CCTGCGCTTAATTT-GACTCAACTCGGGAAA-ACTTACCAAGCTCAGATAT  
AATAAGGATTGACAGA-CTAA-AAGATCTTTCATGATTGTATAAGTGGTGGTGCATGGTC  
GTTCTTAG-TTGGTGGAGTGATTGTCTGGTCAATTCCGATAACGGACGAGACGTCTACT  
TGCTAACTAGTGTAAATTTATATGCCGA-ACGAGAGATAGCTAGT-TTGTATTGATTTTT  
ATTG--A-CGCAA--G-TCG---GTAGACTTCGTATAGATTAGTGTGTATCTTGGTAAAA  
TAA--TTTATATCATAAACTTTA---AA-CTTCTTAGAAGGACTACCT-ACCTCAAGTGG  
GGGG-AAGTCGGACGCAATAACAGGTCTGTGATGCCCTTAGATACCTT-GGGCTGCACGC  
GCGTTACAATGTAGAGTGGAAAAAGGC---TTCCC-----GTGACCGG-AAG---GT  
C-ATGGTAATCATTGTAATCTACGTAATAGGGATTG-ATCTTTGTAATTATCGATCA  
TAAACGAGAAATTCCTTGTAAAGCGTAAATCATTACTTTACGCTGAATATGTCCCTGCCCT  
TTGTACACACCGCCCGTCTCTACCGATCGAACGATTAGGTAATAATTGACGGACGG--  
-TGA---ACCTG--C-----AG-A-AGG-AT---C-----AAAT--GCCT-AACC--TG  
CGA-TT--GAT--C-----CTGCCG

>HQ141512.1\_Acytostelium\_leptosomum\_212rjb

TCTAAG-TATAAACTTTAA-TACGGTGAAC----CTGCAGAAGGATCAAT--ACAA--CA  
--TGT---GATAAAGTA-CAGAACTTTCGC-GCGTA---AG-CGCTTTTGGATAACCG  
CAGTAAATCGGGGCTAATCATATAAAA-CG-AAAGA-TTAATAGTGT--CTACTGTT-GA  
T-TTTCGATGTT-----A-GTCAATTT-CAA---A-ACTAGCCTTTCGGAGTTAGTGGT  
GAATCCGAACAATATTGCTGATCGA-A-----ATT-TATTT-CGACGAGTTCTATCT  
GTCACTGCCCTATCAACTTTCGATGGTACGGTATTGGCCTACCATGGTTGAACGGGTAA  
CGGGGAATCAGGGTTCGATTCCGGAGAGGGCGCCTGAGAAATGGCGACCACTTCTACGGA  
AGGACGAGGCGCGCAAATT-ACTCAATCCCAATAC-GGGGAAGTAGTGACAATAAATAC  
TAATTTCTTTCCATTT-TATGGAGG--AAAAATGGAATAAGTACAACGTAATAAGCTTAA  
CC-AAAGTAATTGGAGGGCAAGTCTGGTGCCAGCAGCCGCGTAATCCAGCTCAA-TA  
GCGTATACTAAATTTGTTGCAAGTAAAA-AGC-TCGTAGTTCAGATAAAGGTTGTTTCG-G  
GT-CAAG-----GTG-TCCTTA---T-AAAATAAGCATCTG  
ATT-CTA-TCTAATTTATTAGTT-TAGTATCA-CCGACAAC-TTTATTTAGGG-TCT---  
---GTTATCAATTTATT--GGTGATT-GATCTATCCACTGTGAGAAAA-TTGTAGTGTT  
TAAAGCA--AG-C---GT---TTCTGCTTGTCAATGCAGCATGGTATGGTAAAAATAGG  
ACAC---TTAACAATT-GTTGGTTT-TTT-----GTTGAAGTGAATGACTAATAGGGAA  
GGGCGGATCGTACATATTGATGGGCGAGAGGTGAAATTCGTTGACCCTATCAAGATGCA  
CTACAGCGAAAGCATTGATAAGTACTTCTCCATTAATCAAGAACGAAAGTTTGGGGATC  
GAAGACGATCAGATACCGTCGTAGTCCAAACTATAAACTATGTGACACAGGGATCGGATA  
GATTA-ATTTCTAACTCTAT-TCGGAACCTT-GTGAGAAATCAT-GAGTGTTTGGACTC  
TGGGGGAGTATGGTTCGAAGGCTGAACTTAAAGGAATTGACGGAAGGGCACACAATGG  
AGTGGAG-CCTGCGCTTAATTT-GACTCAACTCGGGAAA-ACTTACCAAGCTCAGATAT  
AATAAGGATTGACAGA-CTAA-AAGATCTTTCATGATTGTATAAGTGGTGGTGCATGGTC  
GTTCTTAG-TTGGTGGAGTGATTGTCTGGTCAATTCCGATAACGGACGAGACGTCTACT  
TACTAAATAGTAGGATTAT-GGGTCAATATGTGGGATAGGTCTT-AGGGTTTGTA--T  
ATAT--TTC-CAAAAAGATTT---GTATGCTACCACT--ATGGCTGTGTAGCAGCACTTT  
TAA--ATTCGAG-TAAAAACTA---AA-CTTCTTAGAAGGACTACCC-ACCTCAAGTGG  
GGGG-AAGTCGGACGCAATAACAGGTCTGTGATGCCCTTAGATACCTT-GGGCTGCACGC  
GCGCTACAATGTAGAGATGAAAAAGGT---TTCCG-----GGTACCGG-AAG---GT  
ATC-GGTAATCTTGAATACTACTACGTGATAGGGATTG-ATCTTTGTAATTATCGATCA  
TCAACGAGGAATTCCTTGTAAAGCGTAAGTCACTTACGCTGAATAGGTCCCTGCCCT  
TTGTACACACCGCCCGTCTCTACCGATCGAACGATTAGGTAATAACTGACGGACGG--  
-TGA---ACCTG--C-----AG-A-AGG-ATCATT-----AGTC-AAC---AC---TC  
G-TGTT--GAT--C-----CTGC-T

>AM168109.1\_Acytostelium\_longisorophorum\_DB10A

TCTAAG-TATAAACTTTA-TACGGTGAAC----CTGCAGACGGCTCATT--ACAA--CA  
---GT---GATAAACTA-CAGAACTTTCGA-GCGT-----CTTTTT-GGATAACCG  
CAGTAAATCGGGGCTAATCATATAAAA-CG-GAAGG-CGATTG-----AAG-AG  
TCCTTGCGATTACT---A-GC---TT---A---A-ACCAACCT-----GTT  
GAAACCGAATAATATTGCTGATC-AGA-----A-----ATTCTGACAAGTTCTATGT  
GTCACTGCCCTATCAACTT-GATGGTACGGTATTGGCCTACCATGGTTGTAACGGGTAA  
CGGGGAATCAGGGTTCGATTCCGGAGAGGGAGCCTGAGAAATGGCTACCACTTCTACGGA  
AGGACGAGGCGCGCAAATT-ACTCAATCCCAATAC-GGGGAA-TAGTGACAATAAATAC  
TAATGTTCTTCC--TT-TATGGAGA--ACAATTGGAATAAGTACAACGTAATAAGCTTAG  
CA-AAAGTAATGGGAGGGCAAGTCTGGT-----  
-----  
-----  
-----  
-----TCAATCCACTGTGAGAAAA-TTGTGGTGT

TAAAGCA--GG-C---GT----TC-AGTCTGATCAATGCAGCATGGTATGGTAAAAATATG  
ACAC--TT--CATTT-GTTGGTT-----AGTGTAACTGACTAATAGGGAA  
GGGCGGGGCCGTTATATTGATGGGCGAGAGGTGAAATTCGTTGACCCTATCAAGATGCA  
CTACAGCGAAAGCATTTCGGCAAGTACTTCTCCATTAATCAAGAACGAAAAGTTTGGGGTTC  
GAAAGCAGATCAGATACCGTCGTAGTCCAAACCATAAAATGATGTGATCAGGGATCGG-TA  
G-----TAAATCTTATCGGAACCTT-GTGAGAAATCAT-GAATGTTGGACTC  
TGGGGGGAGTATGGTCGCAAGGCTGAAACTTAAAGGAATTGACGGAAGGGCACACAATGG  
AGTGGAA-CCTGCGGCTTAATTT-GACTCAACTCGGGAAA-ACTTACCAAGCTCAGATAT  
AATAAGGATTGACAGA-CTAA-AAGATCTTTCATGATTGTATAAGTGGTGGTGCATGGTC  
GTTCTTAG-TTGGTGGAGTGATTTGTCTGGTCAATTCCGATAACGGACGAGACGTCTACT  
TGCTAACTAGTAGGATTTATTTTTCCAAAT-GGGGGATAGTTAGT-TGGTGGT-----  
-----GTGG---GTA---TTCCATT-GATTAGTGTGTACTCTGGATTGA  
TAG--AT-----CTTCTTAGAAGGACTACCT-ACCTCAAGTAG  
GGGG-AAATCGGACGCAATAACAGGCTCTGTGATGCCCTTAGATACCTT-GGGCTGCACGC  
GCGTCAACTGAGCATAGAAAAAGGC-----C-----GTTGCTGG-AAA---G-  
CAATGGTAATCAAAA--AATATACTACGTAATAGGGATTG-ATCTTTGTAATTATCGATCA  
TAAACGAGGAATTCCTTGTAAGCGTAATTCATTACATTACGCTGAATATGTCCTGCCCT  
TTGTACACACCGCCCGTCTCTACCGATCGAATGATTGGGTAAAACTGACAGAT----

-----TA-GAAG--TTA  
T-T-TAAATCT--C----ATT--GTTT

>AM168115.1\_Acytostelium\_anastomosans\_PP1

TCTAAG-TATAAACTTTTA-TACGGTGAAA----CTGCAGACGGCTCATT--ACAA--CA  
---GT---GATAAACTA-CAGAACCTTCGA-GCGTA----AG-CTTTTT-GGATAACCG  
CAGTAAATCGGGGCTAATACATATAAAA-CG-GAAGG-CGATTGGG----CAACCAAG-AG  
TCCTTGCGATTACT----A-GC---TT-C-A---A-ACCAACCTCTATG-AGATTGAGTT  
GAAACCGAATAATATTGCTGATC-AGA-----ATT-TAATTCTGACAAGTTCTATGT  
GTCACTGCCCTATCAACTTTCGATGGTACGGTATTGGCCTACCATGGTTGTAACGGGTAA  
CGGGGAATCAGGGTTCGATTCCGGAGAGGGAGCCTGAGAAAATGGCTACCACTTCTACGGA  
AGGCAGCAGGCGCGCAAATT-ACTCAATCCCAATAC-GGGGAAGTAGTGACAATAAATAC  
TAATGTTCTTCCATTT-TATGGAGA--ACAATTGGAATAAGTACAACGTAATAGCTTAG  
CA-AAAGTAATTGGAGGGCAAGTCTGGTGCCAGCAGCCGCGGTAATTCCAGCTCCAA-TA  
GCGTATACTAAAATTTGTTGCAAGTAAAAA-AGC-TCGTAGTTTAGGCAGAGGTCATTTCG-G  
AT-TCAT-----TAATTTACCTTCAAAAAGTG-ACTT-----T-----AAAGGCTAT-  
ATCACGCTTCGGTTGTGTTTAT-----GGTCA-CCGATGACTTGTATTATGA--CGT-TA  
TTTGTTAGTTTACTAGCT-TATAATC---GTCAATCCACTGTGAGAAAA-TTGTGGTGT  
TAAAGCA--GG-C---GT---TCTAGTCTGATCAATGCAGCATGGTATGGTAAAAATATG  
ACAC---TTAACATTT-GTTGGTTT-ACT---TTGTTATAGTGAATGACTAATAGGGAA  
GGGCGGGGCCGTTCAATTGATGGGCGAGAGGTGAAATTCGTTGACCCTATCAAGATGCA  
CTACAGCGAAAGCATTTCGGCAAGTACTTCTCCATTAATCAAGAACGAAAAGTTTGGGGATC  
GAAGACGATCAGATACCGTCGTAGTCCAAACCATAAAATGATGTGATCAGGGATCGG-TA  
GGATTT-AATTGTAATTTCTTATCGGAACCTT-GTGAGAAATCAT-GAATGTTTGGACTC  
TGGGGGGAGTATGGTCGCAAGGCTGAAACTTAAAGGAATTGACGGAAGGGCACACAATGG  
AGTGGAA-CCTGCGGCTTAATTT-GACTCAACTCGGGAAA-ACTTACCAAGCTCAGATAT  
AATAAGGATTGACAGA-CTAA-AAGATCTTTCATGATTGTATAAGTGGTGGTGCATGGTC  
GTTCTTAG-TTGGTGGAGTGATTTGTCTGGTCAATTCCGATAACGGACGAGACGTCTACT  
TGCTAACTAGTAGGATTTATTTTTCCAAAT-GGGGGATAGTTAGT-TGGTGGTAGTATTC  
A----TTCGCAAG-GGTGG---GTA---TTCCATT-GATTAGTGTGTACTCTGGATTGA  
TAG--ATTTAG-TAAAAACATA---AA-CTTCTTAGAAGGACTACCT-ACCTCAAGTAG  
GGGG-AAGTCGGACGCAATAACAGGCTCTGTGATGCCCTTAGATACCTT-GGGCTGCACGC  
GCGTTACAATGCAGCATAGAAAAAGGC----TC--C-----GTTGCTGG-AAA---G-  
CAATGGTAATCAAAAAGTATACTACGTAATAGGGATTG-ATCTTTGTAATTATCGATCA  
TAAACGAGGAATTCCTTGTAAGCGTAATTCATTACATTACGCTGAATATGTCCTGCCCT  
TTGTACACACCGCCCGTCTCTACCGATCGAATGATTAGGTA AAAACTGACAGAT----

-----AAA-A--A-TTTTTGTA-AA--A-----AAAT--GTA-GAAG--TTA  
T-T-TAAATCT--C----ATT--GTTT

>AM168111.1\_Acytostelium\_leptosomum\_FG12

TCTAAG-TATAAACTTTTA-TACGGTGAAA----CTGCAGACGGCTCATT--ACAA--CA  
---GT---GATAAACTA-CAGAACCTTCGA-GCGTA----AG-CTTTTT-GGATAACCG  
CAGTAAATCGGGGCTAATACATATAAAA-CG-GAAGG-CGATTGGG----CAACCAAG-AG  
TCCTTGCGATTACT----A-GC---TT-C-A---A-ACCAACCTCTATG-AGATTGAGTT  
GAAACCGAATAATATTGCTGATC-AGA-----ATT-TAATTCTGACAAGTTCTATGT  
GTCACTGCCCTATCAACTTTCGATGGTACGGTATTGGCCTACCATGGTTGTAACGGGTAA  
CGGGGAATCAGGGTTCGATTCCGGAGAGGGAGCCTGAGAAAATGGCTACCACTTCTACGGA  
AGGCAGCAGGCGCGCAAATT-ACTCAATCCCAATAC-GGGGAAGTAGTGACAATAAATAC  
TAATGTTCTTCCATTT-TATGGAGA--ACAATTGGAATAAGTACAACGTAATAGCTTCG  
CA-AAAGTAATTGGAGGGCAAGTCTGGTCCAGCAGCCGCGGTAATTCCAGCTCCAA-TA  
GCGTATACTAAAATTTGTTGCAAGTAAAAA-AGC-TCGTAGTTTAGGCAGAGGTCATTTCG-G  
AT-TCAT-----TAATTTACCTTCAAAAAGTG-ACTT-----T-----AAAGGCTAT-  
ATCACGCTTCGGTTGTGTTTAT-----GGTCA-CCGATGACTTGTATTATGA--CGT-TA  
TTTGTTAGTTTACTAGCT-TATAATC---GTCAATCCACTGTGAGAAAA-TTGTGGTGT  
TAAAGCA--GG-C---GT---TCTAGCCTGATCAATGCAGCATGGTATGGTAAAAATATG  
ACAC---TTAACATTT-GTTGGTTT-ACT---TTGTTATAGTGAATGACTAATAGGGAA  
GGGCGGGGCCGTTCAATTGATGGGCGAGAGGTGAAATTCGTTGACCCTATCAAGATGCA

CTACAGCGAAAGCATTCCGGCAAGTACTTCTCCATTAATCAAGAACGAAAAGTTTGGGGATC  
GAAGCCGATCAGATACCGTCGTAGTCCAAACCATAAATGATGTCGATCAGGGATCGG-TA  
GGATTT-AATTGTAAATTTCTTATCGGAACCTT-GTGAGAAATCAT-GAATGTTTGGACTC  
TGGGGGGAGTATGGTGCAGAGGCTGAAACTTAAAGGAATTGACGGAAGGGCACACAATGG  
AGTGGAA-CCTGCGGCTTAATTT-GACTCAACTCGGGAAA-ACTTACCAAGCTCAGATAT  
AATAAGGATTGACAGA-CTAA-AAGATCTTTCATGATTGTATAAGTGGTGGTGCATGGTC  
GTTCTTAG-TTGGTGGAGTGATTTGTCTGGTCAATTCCGATAACGGACGAGACGTCTACT  
TGCTAACTAGTAGGATTTATTTTCCAAAT-GGGGGATAGTTAGT-TGGTGGTAGTATTC  
A----TTCGCAAG-GGTGG---GTA---TTCCATT-GATTAGTGTGTACTCTGGATTGA  
TAG--ATTTTAG-TAAAAACATA---AA-CTTCTTAGAAGGACTACCT-ACCTCAAGTAG  
GGGG-AAGTCGGACGCAATAACAGGTCTGTGATGCCCTTAGATACCTT-GGGCTGCACGC  
GCGTTACAATGCAGCATAGAAAAAGGC----TC--C-----GTTGCTGG-AAA---G-  
CAATGGTAATCAAAAAGAAATATACTACGTAATAGGGATTG-ATCTTTGTAATTATCGATCA  
TAAACGAGGAATTCCTTGTAAAGCGTAATTCATTACATTACGCTGAATATGTCCTGCCCT  
TTGTACACACCGCCCTCGCTCCTACCGATCGAATGATTAGGTA AAAACTGACAGAT----  
-----AAA-A--A-TTTTGTGA-AA--A-----AAAT--GTA-GAAG--TTA  
T-T-TAAATCT--C----ATT--GTTT

>HQ141514.1 *Acytostelium\_singulare* FDIB

TCTAAG-TATAAACTTTTA-TACGGTGAAA----CTGCAGACGGATCAAT--ACAA--CA  
---GT---GATAAACTA-CAGAACTTTCGA-GCGTA----AG-CTTTTT-GGATAACCG  
CAGTAAATCGGGGCTAATACATATAAA-CG-GAAGG-CGATTGGG----CAACCAAG-AG  
TCCTTGCGATTACT----A-GC---TT-C-A---A-ACCAACCTCTATG-AGATTGAGTT  
GAAACCGAATAATATTGTCTGAT-AGA-----ATT-TAATTCTGACAAGTCTATGT  
GTACTGCCCTATCAACTTTCGATGGTACGGTATTGGCCTACCATGGTTGTAACGGGTAA  
CGGGGAATCAGGGTTCGATTCCGGAGAGGGAGCCTGAGAAATGGCTACCCTTCTACGGA  
AGGCAGCAGGCGCGCAAATT-ACTCAATCCCAATAC-GGGGAAGTAGTGACAATAAATAC  
TAATGTTCTTCCATTT-TATGGAGA--ACAATTGGAATAAGTACAACGTAATAGCTTAG  
CA-AAAGTAATTGGAGGGCAAGTCTGGTGCCAGCAGCCGCGTAATTCCAGCTCCAA-TA  
GCGTATACTAAATTTGTTGCAGTTAAAA-AGC-TCGTAGTTTAGGCAGAGGTCATTTCG-G  
AT-TCAT-----TAATTCACCTCAAAAAGTG-ACTT-----T----AAAGGCTAT-  
ATCAGCTTCGGTTGTGTTTAT-----GGTCA-CCGATGACTTGTATTATGA--CGT-TA  
TTGTTAGTTTACTAGCT-TATAATC---GTCAATCCACTGTGAGAAAA-TTGTGGTGT  
TAAAGCA--GG-C---GT---TCTAGTCTGATCAATGCAGCATGGTATGGTAAAAATAG  
ACAC---TTAACATTT-GTTGGTTT-ACT---TTGTTATAGTGAATGACTAATAGGGAA  
GGGCGGGGCCGTTCAATGATGGGCGAGAGGTGAAATTCGTTGACCCTATCAAGATGCA  
CTACAGCGAAAGCATTCCGCAAGTACTTCTCCATTAATCAAGAACGAAAAGTTTGGGGATC  
GAAAGCATCAGATACCGTCGTAGTCCAAACCATAAATGATGTCGATCAGGGATCGG-TA  
GGATTT-AATTGTAAATTTCTTATCGGAACCTT-GTGAGAAATCAT-GAATGTTTGGACTC  
TGGGGGGAGTATGGTGCAGAGGCTGAAACTTAAAGGAATTGACGGAAGGGCACACAATGG  
AGTGGAA-CCTGCGGCTTAATTT-GACTCAACTCGGGAAA-ACTTACCAAGCTCAGATAT  
AATAAGGATTGACAGA-CTAA-AAGATCTTTCATGATTGTATAAGTGGTGGTGCATGGTC  
GTTCTTAG-TTGGTGGAGTGATTTGTCTGGTCAATTCCGATAACGGACGAGACGTCTACT  
TGCTAACTAGTAGGATTTATTTTCCAAAT-GGGGGATAGTTAGT-TGGTGGTAGTATTC  
A----TTCGCAAG-GGTGG---GTA---TTCCATT-GATTAGTGTGTACTCTGGATTGA  
TAG--ATTTTAG-TAAAAACATA---AA-CTTCTTAGAAGGACTACCT-ACCTCAAGTAG  
GGGG-AAGTCGGACGCAATAACAGGTCTGTGATGCCCTTAGATACCTT-GGGCTGCACGC  
GCGTTACAATGCAGCATAGAAAAAGGC----TT--C-----GTTGCTGG-AAA---G-  
CAATGGTAATCAAAAAGAAATATACTACGTAATAGGGATTG-ATCTTTGTAATTATCGATCA  
TAAACGAGGAATTCCTTGTAAAGCGTAATTCATTACATTACGCTGAATATGTCCTGCCCT  
TTGTACACACCGCCCTCGCTCCTACCGATCGAATGATTAGGTA AAAACTGACAGATGG--  
-TGA---ACCTG--C----AG-A-AGG-ATCA-TAACATT--GTG-TTGTATACAC-AT  
--AGAC---A---C-----T

>AM168114.1 *Acytostelium\_digitatum* OH517

TCTAAG-TATAAACCTTTA-TACGGTGAAA----CTGCGGACGGCTCATT--ACAA--CA  
---GT---GATAAACTA-AAGAACTTTCGC-GCGAA----AG-CGTTTT-GGATAACCG  
CAGTAAATCGGGGCTAATACATATAAA-CG-AAAGG-CGAATGGTTTTATTACCATA-AG  
TTCTTTCGATTATT---A-GTCATTT-T-A---A-ACCAACCTTTCGGAGTTTGTGTT  
GAAACCGAATAATATTGTGATCGAGA-----ATT-TATTCTCGACAAGTCTATGT  
GTCACTGCCCTATCAACTTTGGATGGTACGGTATTGGCCTACCATGGTTGTAACGGGTGA  
CGGGGAATCAGGGTTCGATTCCGGAGAGGGAGCCTGAGAAATGGCTACCCTTCTACGGA  
AGGCAGCAGGCGCGCAAATT-ACTCAATCCCAATAC-GGGGAAGTAGTGACAATAAATAC  
TAATGTCTTTCCAAAT-TTTGGAGG--ACAATTGGAATAAGTACAATGTAATAGCTTAA  
CA-AAAGTAATTGGAGGGCAAGTCTGGTGCCAGCAGCCGCGTAATTCCAGCTCCAA-TA  
GCGTATACTAAATTTGTTGCAGTTAAAA-AGC-TCGTAGTTAAGTTGAAATCTTTTCG-G  
AT-TAAA-----AGAGTTACTCTTACCAAAGAG-----T---TCTCCTTAGATC  
ATTGCTTATCTAATAAGTTAATC----GATCA-CCGAAAATTTTTTTAAG----GT-TA  
CTTTATAGGCAACTATAA-TTTAA-----ACCAATCCACTGTGAGAAAA-TTGTAGTGT  
TAAAGCA--AG-C---TT---TTATGCTTGTCAATGCAGCATGGTATGGTAAAAATAGG  
ACAC---TTAACATTT-GTTGGTTT-ACCA-ITGTTTAAAGTGAATGACTAATAGGGAA  
AGTCGGGGCCGTTCAATGATGGGCGAGAGGTGAAATTCGTTGACCCTATCAAGATGCA  
CTACAGCGAAAGCATTCGGCAAGTATTTCTCCATTAATCAAGAACGAAAAGTTTGGGGATC  
GAAGACGATCAGATACCGTCGTAGTCCAAACCATAAACGATGTCGACCAGAGATTGGGTA  
GACAAT-AAATATAAATGCAT-TCAGAACCTT-GTGAGAAATCAT-GAGTGTGGACTC

TGGGGGGAGTATGGTCGCAAGGCTGAAACTTAAAGGAATTGACGGAAGGGCACACAATGG  
AGTGGAA-CCTGCGCTTAATTT-GACTCAACTCGGGAAA-ACCTACCAAGCTCAGATAT  
AATAAGGATTGACAGA-CTAA-AAGATCTTTCATGATTGTATAAGTGGTGGTGCATGGTC  
GTTCTTAG-TTGGTGGAGTGATTTGTCTGGTCAATTCCGATAACGGACGAGACGTCTACT  
TACTAACTAGTGGGATTTATCTAGTCAATTTGGAGGATAAGTTTT-TAGTGCTTCTATT  
AAGT--CTTTCGGG-GTTT--GTA-G-TT-CATT-GAAGGCTGTGTACTCTGATTAGA  
TAG--ATTCTAG-TAAAAACATA---AA-CTTCTTAGAAGGACTACCT-ACCTCAAGTGG  
GGGG-AAGTTGGACGCAATAACAGGTCTGTGATGCCCTTAGATACCTT-GGGCTGCACGC  
GCGTTACAATGTAACAGAGAAAAAGGC----TTTCC-----ATGTCTGG-AAA---GA  
C-ATGGTAATCAATTGAATCTACTACGTAATAGGGATTG-ATCTTTGTAATTATCGATCA  
TCAACGAGGAATTCCTGTAAAGCGTAAGTCATTACCTTACGCTGAATATGTCCCTGCCCT  
TTGTACACACCGCCCGTCTCTACCGATCGAACGATTAGGTAAAAATTGACAGATT---  
-TGATTA-----A----AGCAGCAA---TGTT---ATTAATC-TTA-GAAG--TTA  
T-T-TAAATCT--C----ATT--GTTT

>AM168113.1 *Acytostelium serpentinum* SAB3A

TCTAAG-TATAAACTTTAA-TACGGTGAAA----CTGCGGACGGCTCATT--ACAA--CA  
---GT---GATAAAGTA-CAGAACTTTCGC-GCGTA----AG-CGTCTTGGATAACCG  
CAGTAAATCGGGGCTAATACATATAAAA-CG-AAAGA-TTAATAGTTT--CTACTGTT-GA  
T-TTTGCGATTGTT---A-GTCATTT-CAA---A-ACTAGCCTTTCGGAGTTAGTGGT  
GAATCCGAACAATATTGCTGATCGA-A-----ATT-TATTT-CGACGAGTTCTATCT  
GTCCTGCCCTATCAACTTTCGATGGTACGGTATTGGCCTACCATGGTTGTAACGGGTAA  
CGGGGAATCAGGGTTCGATTCCGGAGAGGGCGCCTGAGAAAATGGCGACCACTTCTACGGA  
AGGCAGCAGGCGCGCAAACT-ACTCAATCCCAATAC-GGGGAAGTAGTGACAATAAATAC  
TAAATTTCTTTCCATTT-TATGGAGG--AAAATTGGAATAAGTACAACGTAATAATAGCTTAA  
CC-AAAGTAATTGGAGGGCAAGTCTGGTGCCAGCAGCCGCGTAATTCCAGCTCCAA-TA  
GCGTATACTAAATTTGTTGCAAGTAAAA-AGC-TCGTAGTTCAGATAAAGGTTGTTTCG-G  
GT-CAAG-----GTG-TCTTTA---T-AAAATAAGCATCTG  
ATT-CTA-TCTAATTTTATAGTC-TAGTATCA-CCGACAAC-TTTATTTAGGG-TCT---  
---GTTATCAATTTATT--GGTGATTT-GATCTATCCACTGTGAGAAAA-TTGTAGTGTT  
TAAAGCA--AG-C---GT---TTCTGCTTGTCAATGCAGCATGGTATGGTAAAAATAGG  
ACAC---TTAACAATT-GTTGGTTT-TTT----GTTGAAGTGTAATGACTAATAGGGAA  
GGGCGGATCGTACATATTGATGGGCGAGAGGTGAAATTCGTTGACCCTATCAAGATGCA  
CTACAGCGAAAGCATTGATAAGTACTTCTCCATTAATCAAGAACGAAAAGTTTGGGGATC  
GAAGACGATCAGATACCGTCGTAGTCCAACTATAAACTATGTCGACCAGGGATCGGATA  
GATTAA-ATTTCTAACTCTAT-TCGGAACCTT-GTGAGAAATCAT-GAGTGTGTTGGACTC  
TGGGGGGAGTATGGTCGCAAGGCTGAAACTTAAAGGAATTGACGGAAGGGCACACAATGG  
AGTGGAG-CCTGCGCTTAATTT-GACTCAACTCGGGAAA-ACCTACCAAGCTCAGATAT  
AATAAGGATTGACAGA-CTAA-AAGATCTTTCATGATTGTATAAGTGGTGGTGCATGGTC  
GTTCTTAG-TTGGTGGAGTGATTTGTCTGGTCAATTCCGATAACGGACGAGACGTCTACT  
TACTAAATAGTAGGATTTAT-GGGTCAATATGTGGGATAGGTCTT-AGGGGTTTGTGTA--T  
ATAT--TTC-CAAAAGATT---GTATGCTACCCT--ATGGCTGTGTAGCAGCACTCTT  
TAA--ATTCGAG-TAAAAAACTA---AA-CTTCTTAGAAGGACTACCC-ACCTCAAGTGG  
GGGG-AAGTCGGACGCAATAACAGGTCTGTGATGCCCTTAGATACCTT-GGGCTGCACGC  
GCGCTACAATGTAGAGATGAAAAAGGT----TTCCG-----GGTACCGG-AAG---GT  
ATC-GGTAATCATTTGAATTAATGACTTACGTGATAGGGATTG-ATCTTTGTAATTATCGATCA  
TCAACGAGGAATTCCTTGTAAAGCGTAAGTCATTACCTTACGCTGAATAGGTCCCTGCCCT  
TTGTACACACCGCCCGTCTCTACCGATCGAACGATTAGGTAAAACTGACGGACT---  
-TAG---ACCTA--CCTTTTGG-CATGG-----TC-GGG-GAAG--TTA  
T-T-TAAATCT--C----ATT--GTTT

>AM168112.1 *Rostrostelium ellipticum* AE2

TCTAAG-TATAAACCTTTA-TACGGTGAAA----CTGCGAGACGGCTCATT--ACAA--CA  
---GT---GATAAACTA-ATGGACTTTCGC-GCCTTTAAAAAG-CGTCTT-GGATATCCG  
CAGTAAATCGGGGCTAATACATGCAAAA-CG-AAAGGGTGAGCGGG---TAACCGCG-AG  
CCTTTGCAATTAATTT-TA-GCT-TTTGCT-----ACCAACCTTTAGGAGTTTGTGTT  
GAATCCGAATAATTTGCTGATCGGAA-----TTT-TA-TTCCGACAAGTTCAAAGT  
GTCCTGCCCTATCAACTTTCGATGGTACGGTATTGGCCTACCATGGTTGTAACGGGTAA  
CGGGGAATCAGGGTTCGGTTCGGGAGAGGGCGCCTGAGAAAATGGCGACCACTTCTACGGA  
AGGCAGCAGGCGCGCAAAAT-ACTCAATCCCAATAC-GGGGAAGTAGTGACAATAAATAC  
TGATGCCTTTCCATTT-TATGGAGG--GTAATTAGAATAAGTACAATTTAAATCGCTTAG  
CC-AAAGTGATTGGAGGGCAAGTCTGGTGCCAGCAGCCGCGTAATTCCAGCTCCAA-TA  
GCATATACTAAATTTGTTGCAAGTAAAA-AGC-TCGTAGTTTGAATGAAATTTTTCG--  
----AG---GG-ATTTT-GATTTTACAATCTGAACCC--T-GT-CT-TAAATTGCTT  
A-CGGG--TTAATTTTGA--C--TGT-----CTCGATAATTTCAATTTTG-CCT--T-  
T-A---GGCATT-ATG--TCTATTA--GGTAGGTCCACTGTGAGAAAA-TTGTGGTGT  
TAAAGCG--GA-C---GT---TTTTGTTTTCATTGCAGCATGGTATGGTAAAAACAAG  
ACAC---TGTTCACT-GTTGGTTG-TGAA-----T-CAGTGAATGACTAATAGGGAA  
GGACGGGGCCGTTCAATTTGATGGGCGAGAGGTGAAATTCGTTGACCCTATCAAGATGCA  
CTACAGCGAAAGCATTGCGCAAGTACTTCCCCATTAATCAAGAACGAAAAGTTTGGGGATC  
GAAGACGATCAGATACCGTCGTAGTCCAAACCATAAACTATGTCGACCAGGGACTGGACG  
GATGAT-TTTTAAAAAATCGCTCAGAACCCTT-GTGGGAAACCAT-GAGTGTGTTGATT  
CGGGGGGAGTATGGTCGCAAGTCTGAAACTTAAAGGAATTGACGGAAGGGCACACAATGG  
AGTGGAA-CCTGCGCTTAATTT-GACTCAACTCGGGAAA-ACCTACCAAGCTCAGATAT  
AGTAAGGATTGACAGA-CTAA-AAGATTTTTCATGATTCTATAAGTGGTGGTGCATGGTC

GTTCTTAG-TTGGTGGAGTGATTGTCTGGTCAATTCCGATAACGGACGAGACCTCTACC  
TACTAAATAGTGGTATTTATTTGTCGTTATGGGGGATAGTTAGT-TGGCGAGAGTAGT-  
AGGT--TTTCGGA---TTTA---TTATTTCT-CGTTGAT-TGGTGTGTACCTCGATAAGA  
TAG--ATTACTTCTAAAAA--TA---A--CTTCTTAGAGGGACTACCC-ACCTCAAGTGG  
GGGG-AAGTCGGAGGCAATAACAGGTCTGTGATGCCCTTAGATACCTT-GGGCTGCACGG  
GCGTTACAATGAAAAGCGTGAAAAAGGC----TCCC-----AGCACCGG-AGG---GT  
GT-TGGAATCATATGAATCATGTTCGTAATGGGGATTG-ACCTTTGTAATTATCGGTCA  
TAAACGAGGAATTCCTTGTAAGCGCAAGTCATTACCTTGCCTGTAATATGTCCTGCCCT  
TTGTACACACCGCCCGTCTCCTACCGATCGAACGATTAGGTA AAAACTGACAGATTG--  
-----TTTTG--TAAGGTAG-C-AAT-ATTTTAC-----AGAA-TGA-AAAG--TTA  
T-T-TAAATCT--C----ATT--GTTT  
>KP167477.1 *Heterostelium lapidosum*  
TCTAAG-TATAA-CCTTTA-TACGGTGAAC----CTGCAGAAAGGATCAT---CCC-G-  
---GTTT-AGATAAACTATAAGAACCTTTCGC-GCTTC----GGCGTCTT-GGATAACCG  
CAGTAAATCGGGGCTAATACATGTTAAA-CG-AGAGGATGAGCGGG----CAACTGCG-AG  
TCTTTGCGATTGTT---A-GCT-ATT-CA---CACACCAACCTCTTCGGAGTTTGTGGT  
GAGTCCGAACAATATTGCTGATCGGAA-----ATT-TATTTCCGACAAGTCTTTGT  
GTCACTGCCCTATCAACTTTCGATGGTAAGGTATTGGCTTACCATGGTTGTAACGGGTGA  
CGGGGAATCAGGGTTCGATTCGGAGAGGGAGCCTGAGAAAATGGCTACCCTCTATGGA  
AGGCAGCAGGCGCGCAAATT-ACTCAATCCCAATAC-GGGGAAGTAGTGACAAAAAATAC  
TAATGCCTTTCCATTTATATGGGGG--GCAATTGGAATAAGTACAACCTTAAATCGCTTAG  
CA-AAAGTGATTGGAGGGCAAGTCTGGTGCCAGCAGCCGCGGTAATTCCAGCTCCAA-TA  
GCGTATACTAAATTTGTTGCAAGTAAAA-AGC-TCGTAGTTGAGATTGAGATTCTTG-G  
GT-TTAG--CAGGCATTGTGCCTT--CGGGTTGGCA--A-TCGT-TTGTAAGCGCTAT  
AATGGGATTTT-CTCTCA-TTATATGTGTTA-CCAAGAAATTTCCAACCTGC-CCA--TG  
TCAAGTGGCAACACTTG--TCTGATA--GGGTGATCTACTGTGAGAAAA-TTGATAGTGT  
CAAAGCA--GG-C---GTC---TTACGTTTGTCAATGCAGCATGGTATAGTAAAAATG  
ACAC---TAAATATAT-GTTGGTTG-TATA---TTCT-TAGTGTAATGACTAATAGGGAA  
GGGCGGGGCCGTTCAATTGATGGGCGAGAGGTGAAATTCGTTGACCCTATCAAGATGCA  
CTACAGCGAAAGCATTTCGGCAAGTACTTCTCCATTAATCAAGAACGAAAAGTTTGGGGATC  
GAAGACGATCAGATAACCGTCTAGTCCAAACCATAAACTATGTCGACCAGGGATTGGACG  
GATAAT-TTTTTAAAAAACTCGCTCAGAACCTT-GTGAGAAATCAT-GAGTGTGTTGGACTC  
TGGGGGAGTATGGTTCGCAAGTCTGAAACTTAAAGGAATTGACGGAAGGGCACACAATGG  
AGTGGAA-CCTGCGGCTTAATTT-GACTCAACTCGGGAAA-ACTTACCAAGCTCAGATAT  
AATAAGGATTGACAGA-CTAA-AAGATCTTTCATGATTGTATAAGTGGTGGTGCATGGTC  
GTTCTTAG-TTGGTGGAGTATTGTCTGGTCAATCCGATAACGGACGAGACCTCTACC  
TGCTAACTAGTGGTATTTATTTGGTCAATATGGGAGATAGCTATT-TGGTGTGGCAGTC  
AGG----GTCAAA---CTTG---ATTGCTCTTCATTGAG-TGGTGTGTATTCTGATCAGA  
TAG--GTACTAACTAAAAAA-TA---AA-CTTCTTAGAGGGACTACCT-ACCTCAAGTGG  
GGGG-AAGTCGGAGGCAATAACAGGTCTGTGATGCCCTTAGATACCTT-GGGCTGCACGC  
GCGTTACAATGTAGACGAGAAAAAGGT----CTCC-----GGCACCGA-AAG---GT  
GTC-GGTAATCATATGAATTGTCTACGTAATGGGGATTA-ATTTTTGTAATTATCGATTA  
TCAACGAGGAATTCCTTGTAAGCGTAAATCATTACTTTGCGCTGAATATGTCCTGCCCT  
TTGTACACACCGCCCGTCTCCTACCGATCGAACGATTAGGTA AAAACTGACAGACTGT-  
--AAC-GGATCT--GT---AAC-C-TGG---TTGAT-----CC-----  
-----TGCC-  
>KP167474.1 *Heterostelium pseudocolligatum*  
-----ACGGTGGACACCTCGGCAGACGGGACAC---AGCA--G-  
---GTTATAGATAAACTA-AAGAACCTTTCGC-GCTTC----GGCGTCTT-GGATAACCG  
CAGTAAATCGGGGCTAATACATGTTAAA-CG-AGAGGATGAGCGGG----CAACTGCG-AG  
TCTTTGCGATTGTT---A-GCT-ATT-CA---CACACCAACCTCTTCGGAGTTTGTGGT  
GAGTCCGAACAATATTGCTGATCGGAA-----ATT-TATTTCCGACAAGTCTTTGT  
GTCACTGCCCTATCAACTTTCGATGGTAAGGTATTGGCTTACCATGGTTGTAACGGGTGA  
CGGGGAATCAGGGTTCGATTCGGAGAGGGAGCCTGAGAAAATGGCTACCCTCTATGGA  
AGGCAGCAGGCGCGCAAATT-ACTCAATCCCAATAC-GGGGAAGTAGTGACAAAAAATAC  
TAATGCCTTTCCATTTATATGGGGG--GCAATTGGAATAAGTACAACCTTAAATCGCTTAG  
CA-AAAGTGATTGGAGGGCAAGTCTGGTGCCAGCAGCCGCGGTAATTCCAGCTCCAA-TA  
GCGTATACTAAATTTGTTGCAAGTAAAA-AGC-TCGTAGTTGAGATTGAGATTCTTG-G  
GT-TTAG--CAGGCATTGTGCCTT--CGGGTTGGCA--A-TCGT-TTGTAAGCGCTAT  
AATGGAATTTT-CTTTCA-TTATATGTGTTA-CCAAGAAATTTCCAACCTGC-CCA--TG  
TCAAGTGGCAACACTTG--TCTGATA--GGGTGATCTACTGTGAGAAAA-TTGATAGTGT  
CAAAGCA--GG-C---GTC---TTACGTTTGTCAATGCAGCATGGTATAGTAAAAAAG  
ACAC---TAAATATAT-GTTGGTTG-TATA---TTCT-TAGTGTAATGACTAATAGGGAA  
GGGCGGGGCCGTTCAATTGATGGGCGAGAGGTGAAATTCGTTGACCCTATCAAGATGCA  
CTACAGCGAAAGCATTTCGGCAAGTACTTCTCCATTAATCAAGAACGAAAAGTTTGGGGATC  
GAAGACGATCAGATACCGTCTAGTCCAAACCATAAACTATGTCGACCAGGGATTGGACG  
GATAAT-TTTTTAAAAAACTCGCTCAGAACCTT-GTGAGAAATCAT-GAGTGTGTTGGACTC  
TGGGGGAGTATGGTTCGCAAGTCTGAAACTTAAAGGAATTGACGGAAGGGCACACAATGG  
AGTGGAA-CCTGCGGCTTAATTT-GACTCAACTCGGGAAA-ACTTACCAAGCTCAGATAT  
AATAAGGATTGACAGA-CTAA-AAGATCTTTCATGATTGTATAAGTGGTGGTGCATGGTC  
GTTCTTAG-TTGGTGGAGTATTGTCTGGTCAATCCGATAACGGACGAGACCTCTACC  
TGCTAACTAGTGGTATTTATTTGGTCAATATGGGAGATAGCTATT-TGGTGTGGCAGTC  
AGG----GTCAAA---CTTG---ATTGCTCTTCATTGAG-TGGTGTGTATTCTGATCAGA

TAG--GTACTAACTAAAAAA-TA---AA-CTTCTTAGAGGGACTACCT-ACCTCAAGTGG  
GGGG-AAGTCGAGGCAATAACAGGTCTGTGATGCCCTTAGATACCTT-GGGCTGCACGC  
GCGTTACAATGTAGACGAGAAAAAGGT----CTCC-----GGCACCGA-AAG---GT  
GTC-GGTAATCATATGAATTGTCTACGTAATGGGGATTA-ATTTTTGTAATTATCGATTA  
TCAACGAGGAATTCCTTGTAAAGCGTAAATCATTACTTTGCGCTGAATATGTCCTGCCCCT  
TTGTACACACCGCCCGTCTCTACCGATCGAACGATTAGGTA AAAACTGACAGACTG--  
--AGT-GGCTCT--GT---AAC-CCTGG---TTGAT-----CCC-----  
-----TGCC-

>HQ141505.1\_Heterostelium\_colligatum HN13C1

TCTAAG-TATAA-CCTTTA-TACGGTGAAC----CTGCAGAAGGATCAACT-ACAGAGCA  
--TGT---GATAAACTA-AAGAACTTTTCGC-GCTTC-----GGCGTCTT-GGATAACCG  
CAGTAAATCGGGGCTAATACATGTA AAA-CG-AGAGGATGAGCGGG----CAACTGCG-AG  
TCTTTGCGATTGTT---A-GCT-ATT-CA---CACACCAACCTCTTCGGAGTTTGTGGT  
GAGTCCGAACAATATTGCTGATCGGAA-----ATT-TATTTCCGACAAGTTCTTTGT  
GTCACTGCCCTATCAACTTTCGATGGTAAGGTATTGGCTTACCATGGTTGTAACGGGTGA  
CGGGGAATCAGGGTTCGATTCCGGAGAGGGAGCCTGAGAAAATGGCTACCACTTCTATGGA  
AGGCAGCAGGCGCGCAAATT-ACTCAATCCCAATAC-GGGGAAGTAGTGACAAAAAATAC  
TAATGCCTTTCCATTATATGGGGG--GCAATTGGAATAAGTACAACCTAAATCGCTTAG  
CA-AAAGTGATTGGAGGGCAAGTCTGGTGCCAGCAGCCGCGGTAATCCAGCTCCAA-TA  
GCGTATACTAAAATTTGTTGCGTGTGTA AAAA-AGC-TCGTAGTTGAGATTGAGATTCTTG-G  
GT-TTAG--CAGGCATTGTGCTT--CGGGTTGGCA--A-TCGT-TTGTAAGCGCTAT  
AATGGAATTTT-ACCTTCA-TTATATGTGTTA-CCAAGAAATTTCCAACCTGC-CCA--TG  
TCAAGTGGCAACACTTG--TCTGATA--GGGTGATCTACTGTGAGAAAA-TTGTAGTGT  
CAAAGCA--GG-C---GTC---TTACGTTTGTCAATGCAGCATGGTATAGTAAAATATG  
ACAC---TAAATATAT-GTTGGTTG-TATA---TTCT-TAGTGTAAATGACTAATAGGGAA  
GGGCGGGGCCGTTCAATTGATGGGCGAGAGGTGAAATTCGTTGACCCTATCAAGATGCA  
CTACAGCGAAAGCATTCCGGCAAGTACTTCTCCATTAATCAAGAACGAAAAGTTTGGGGATC  
GAAGACGATCAGATACCGTCTAGTCCAAACCATAAACTATGTGACACAGGGATTGGACG  
GATAAT-TTTTTAAAAA ACTCGCTCAGAACCTT-GTGAGAAATCAT-GAGTGTGGACTC  
TGGGGGGAGTATGGTTCGCAAGTCTGAAACTTAAAGGAATTGACGGAAGGGCACACAATGG  
AGTGGAA-CCTGCGGCTTAATTT-GACTCAACTCGGGAAA-ACTTACCAAGCTCAGATAT  
AATAAGGATTGACAGA-CTAA-AAGATCTTTCATGATTGTATAAGTGGTGGTGCATGGTC  
GTTCTTAG-TTGGTGGAGTGATTTGTCTGGTCAATTCCGATAACGGACGAGACCTTACC  
TGCTAACTAGTGGTATTTATTTGGTCAATATGGGAGATAGCTATT-TGGTGTGGCAGTC  
AGG----GTCAA---CTTG---ATTGCTCTTCAATTGAG-TGGTGTGATTCTGATCAGA  
TAG--GTACTAACTAAAAAA-TA---AA-CTTCTTAGAGGGACTACCT-ACCTCAAGTGG  
GGGG-AAGTCGAGGCAATAACAGGTCTGTGATGCCCTTAGATACCTT-GGGCTGCACGC  
GCGTTACAATGTAGACGAGAAAAAGGT----CTCC-----GGCACCGA-AAG---GT  
GTC-GGTAATCATATGAATTGTCTACGTAATGGGGATTA-ATTTTTGTAATTATCGATTA  
TCAACGAGGAATTCCTTGTAAAGCGTAAATCATTACTTTGCGCTGAATATGTCCTGCCCCT  
TTGTACACACCGCCCGTCTGCTACCGATCGAACGATTAGGTA AAAACTGACAGACTG--  
--AGT-GACTTC---T---AAC-CATGG---TTGAT-----CCT-GGT-GAACC--TG  
-CA-GAAGGAT--C---A---GCC-

>HQ141509.1\_Heterostelium\_tikalense HN1C1

TCTAAG-TATAA-CCTTTA-TACGGTGAAC----CTGCAGAAGGATCAACT-ACGAG-CA  
--TGT---AGATAAACTA-AAGAACTTTTCGC-GCTTC-----GGCGTCTT-GGATAACCG  
CAGTAAATCGGGGCTAATACATGTA AAA-CG-AGAGGATGAGCGGG----CAACTGCG-AG  
TCTTTGCGATTGTT---A-GCT-ATT-CA---CACACCAACCTCTTCGGAGTTTGTGGT  
GAGTCCGAACAATATTGCTGATCGGAA-----ATT-TATTTCCGACAAGTTCTTTGT  
GTCACTGCCCTATCAACTTTCGATGGTAAGGTATTGGCTTACCATGGTTGTAACGGGTGA  
CGGGGAATCAGGGTTCGATTCCGGAGAGGGAGCCTGAGAAAATGGCTACCACTTCTATGGA  
AGGCAGCAGGCGCGCAAATT-ACTCAATCCCAATAC-GGGGAAGTAGTGACAAAAAATAC  
TAATGCCTTTCCATTATATGGGGG--GCAATTGGAATAAGTACAACCTAAATCGCTTAG  
CA-AAAGTGATTGGAGGGCAAGTCTGGTGCCAGCAGCCGCGTAAATCCAGCTCCA--TA  
GCGTATACTAAAATTTGTTGCAAGTAAAA-AGC-TCGTAGTTGAGATTGAGATTCTTG-G  
GT-TTAG--CAGGCATTGTGCTT--CGGGTTGGCA--A-TCGT-TTGTAAGCGCTAT  
AATGGAATTTT-ACCTTCA-TTATATGTGTTA-CCAAGAAATTTCCAACCTGC-CCA--TG  
TCAAGTGGCAACACTTG--TCTGATA--GGGTGATCTACTGTGAGAAAA-TTGTAGTGT  
CAAAGCA--GG-C---GTC---TTACGTTTGTCAATGCAGCATGGTATAGTAAAATATG  
ACAC---TAAATATAT-GTTGGTTG-TATA---TTCT-TAGTGTAAATGACTAATAGGGAA  
GGGCGGGGCCGTTCAATTGATGGGCGAGAGGTGAAATTCGTTGACCCTATCAAGATGCA  
CTACAGCGAAAAGCATTTCGGCAAGTACTTCTCCATTAATCAAGAACGAAAAGTTTGGGGATC  
GAAGACGATCAGATACCGTCTAGTCCAAACCATAAACTATGTGACACAGGGATTGGACG  
GATAAT-TTTTTAAAAA ACTCGCTCAGAACCTT-GTGAGAAATCAT-GAGTGTGGACTC  
TGGGGGGAGTATGGTTCGCAAGTCTGAAACTTAAAGGAATTGACGGAAGGGCACACAATGG  
AGTGGAA-CCTGCGGCTTAATTT-GACTCAACTCGGGAAA-ACTTACCAAGCTCAGATAT  
AATAAGGATTGACAGA-CTAA-AAGATCTTTCATGATTGTATAAGTGGTGGTGCATGGTC  
GTTCTTAG-TTGGTGGAGTGATTTGTCTGGTCAATTCCGATAACGGACGAGACCTTACC  
TGCTAACTAGTGGTATTTATTTGGTCAATATGGGAGATAGCTATT-TGGTGTGGCAGTC  
AGG----GTCAA---CTTG---ATTGCTCTTCAATTGAG-TGGTGTGATTCTGATCAGA  
TAG--GTACTAACTAAAAAA-TA---AA-CTTCTTAGAGGGACTACCT-ACCTCAAGTGG  
GGGG-AAGTCGAGGCAATAACAGGTCTGTGATGCCCTTAGATACCTT-GGGCTGCACGC  
GCGTTACAATGTAGACGAGAAAAAGGT----CTCC-----GGCACCGA-AAG---GT



GTC-GGTAATCATATGAATTGTCTACGTAATGGGGATTA-ATTTTTGTAATTATCGATTA  
TCAACGAGGAATTCCTTGTAAAGCGTAAATCATTACTTTGCGCTGAATATGTCCCTGCCCT  
TTGTACACACCGCCCGTCGCTCTACCGATCGAACGATTAGGTAAAACTGACAGACTG--  
--AGT-GACTTC-----GGT-GAACC--TG  
-CA-GAAGGAT--C---A-----

>KP167476.1 *Heterostelium racemiferum*

TCTAAG-TATAA-CCTTTA-TACGGTGAAC----CTGCAGAAAGGCTCATT--ACAA--CA  
---GT---GATAAACTA-AAGAACTTTCGC-GCTTC-----GGCGTCTT-GGATAACCG  
CAGTAAATCGGGGCTAATACATGTAAA-CG-AGAGGATGAGCGGG----CAACTGCG-AG  
TCTTTGCGATTGTT---A-GCT-ATT-CA---CACACCAACCTCTTCGGAGTTTGTGGT  
GAGTCCGAACAATATTGCTGATCGGAA-----ATT-TATTTCCGACAAGTTCTTTGT  
GTCACTGCCCTATCAACTTTCGATGGTAAGGTATTGGCTTACCATGGTTGTAACGGGTGA  
CGGGGAATCAGGGTTCGATTCGGAGAGGGAGCCTGAGAAAATGGCTACCACCTCTATGGA  
AGGCAGCAGGCGCGCAAAATT-ACTCAATCCCAATAC-GGGGAAGTAGTGACAAAAAATAC  
TAATGCCTTTCCATTTATATGGGGG--GCAATTGGAATAAGTACAACCTAAATCGCTTAG  
CA-AAAGTGATTGGAGGGCAAGTCTGGTGCCAGCAGCCGCGGTAATTCCAGCTCCAA-TA  
GCGTATACTAAATTTGTTGCAAGTAAAA-AGC-TCGTAGTTGAGATTGAGATTCTTG-G  
GT-TTAG--CAGGCATTGTCGCCTT--CGGGTTGGCA--A-TCGT-TTGTAAGCGCTAT  
AATGGGATTC-ACTCTCA-TTATATGTGTTA-CCAAGAAATTTCCAACCTGC-CCA--TG  
TCAAGTGGCAACACTTG--TCTGATA--GGGTGATCTACTGTGAGAAAA-TTGTAGTGT  
CAAAGCA--GG-C---GTC---TTACGTTTGTTCATGCAGCATGGTATAGTAAAAATATG  
ACAC---TAAATATAT-GTTGGTTG-TATA---TTCT-TAGTGTAAATGACTAATAGGGAA  
GGGCGGGGCCGTTCAATTTGATGGGCGAGAGGTGAAATTCGTTGACCCTATCAAGATGCA  
CTACAGCGAAAGCATTTCGGCAAGTACTTCTCCATTAATCAAGAACGAAAAGTTTGGGGATC  
GAAGACGATCAGATACCGTCGTAGTCCAAACCATAAACTATGTCGACCAGGGATTGGACG  
GATAAT-TTTTTAAAAACTCGCTCAGAACCTT-GTGAGAAATCAT-GAGTGTGGACTC  
TGGGGGGAGTATGGTTCGAAAGTAACTAAAGGAATTGACGGAAGGGCACACAATGG  
AGTGGAA-CCTGCGGCTTAATTT-GACTCAACTCGGGAAA-ACTTACCAAGCTCAGATAT  
AATAAGGATTGACAGA-CTAA-AAGATCTTTCATGATTGTATAAGTGGTGGTGCATGGTC  
GTTCTTAG-TTGGTGGAGTGATTTGTCTGGTCAATTCCGATAACGGACGAGACCTTACC  
TGCTAACTAGTGGTATTTATTTGGTCAATATGGGAGATAGCTATT-TGGTGTGGCAGTC  
AGG---GTCAAA---CTTG---ATTGCTTTCATTGAG-TGGTGTGATTCTGATCAGA  
TAG--GTACTAACTAAAAAA-TA---AA-CTTCTTAGAGGGACTACCT-ACCTCAAGTGG  
GGGG-AAGTCGGAGGCAATAACAGGTCTGTGATGCCCTTAGATACCTT-GGGCTGCACGC  
GCGTTACAATGTAGACGAGAAAAAGGT----CTCC-----GGCACC GA-AAG---GT  
GTC-GGTAATCATATGAATTGTCTACGTAATGGGGATTA-ATTTTTGTAATTATCGATTA  
TCAACGAGGAATTCCTTGTAAAGCGTAAATCATTACTTTGCGCTGAATATGTCCCTGCCCT  
TTGTACACACCGCCCGTCGCTCTACCGATCGAACGATTAGGTAAAACTGACAGACTG--  
--AAT-GGCTT-----

>AM168098.1 *Heterostelium colligatum* OH538

TCTAAG-TATAA-CCTTTA-TACGGTGAAC----CTGCAGACGGCTCATT--ACAA--CA  
---GT---GATAAACTA-AAGAACTTTCGC-GCTTC-----GGCGTCTT-GGATAACCG  
CAGTAAATCGGGGCTAATACATGTAAA-CG-AGAGGATGAGCGGG----CAACTGCG-AG  
TCTTTGCGATTGTT---A-GCT-ATT-CA---CACACCAACCTCTTCGGAGTTTGTGGT  
GAGTCCGAACAATATTGCTGATCGGAA-----ATT-TATTTCCGACAAGTTCTTTGT  
GTCACTGCCCTATCAACTTTCGATGGTAAGGTATTGGCTTACCATGGTTGTAACGGGTGA  
CGGGGAATCAGGGTTCGATTCGGAGAGGGAGCCTGAGAAAATGGCTACCACCTCTATGGA  
AGGCAGCAGGCGCGCAAAATT-ACTCAATCCCAATAC-GGGGAAGTAGTGACAAAAAATAC  
TAATGCCTTTCCATTTATATGGGGG--GCAATTGGAATAAGTACAACCTAAATCGCTTAG  
CA-AAAGTGATTGGAGGGCAAGTCTGGTGCCAGCAGCCGCGGTAGTCCAGCTCCAA-TA  
GCGTATACTAAATTTGTTGCAAGTAAAA-AGC-TCGTAGTTGAGATTGAGATTCTTG-G  
GT-TTAG--CAGGCATTGTCGCCTT--CGGGTTGGCA--A-TCGT-TTGTAAGCGCTAT  
AATGGAATTTTCA-CTTTCA-TTATATGTGTTA-CCAAGAAATTTCCAACCTGC-CCA--TG  
TCAAGTGGCAACACTTG--TCTGATA--GGGTGATCTACTGTGAGAAAA-TTGTAGTGT  
CAAAGCA--GG-C---GTC---TTACGTTTGTTCATGCAGCATGGTATAGTAAAAATATG  
ACAC---TAAATATAT-GTTGGTTG-TATA---TTCT-TAGTGTAAATGACTAATAGGGAA  
GGGCGGGGCCGTTCAATTTGATGGGCGAGAGGTGAAATTCGTTGACCCTATCAAGATGCA  
CTACAGCGAAAGCATTTCGGCAAGTACTTCTCCATTAATCAAGAACGAAAAGTTTGGGGATC  
GAAGACGATCAGATACCGTCGTAGTCCAAACCATAAACTATGTCGACCAGGGATTGGACG  
GATAAT-TTTTTAAAAACTCGCTCAGAACCTT-GTGAGAAATCAT-GAGTGTGGACTC  
TGGGGGGAGTATGGTTCGAAAGTAACTAAAGGAATTGACGGAAGGGCACACAATGG  
AGTGGAA-CCTGCGGCTTAATTT-GACTCAACTCGGGAAA-ACTTACCAAGCTCAGATAT  
AATAAGGATTGACAGA-CTAA-AAGATCTTTCATGATTGTATAAGTGGTGGTGCATGGTC  
GTTCTTAG-TTGGTGGAGTGATTTGTCTGGTCAATTCCGATAACGGACGAGACCTTACC  
TGCTAACTAGTGGTATTTATTTGGTCAATATGGGAGATAGCTATT-TGGTGTGGCAGTC  
AGG---GTCAAA---CTTG---ATTGCTTTCATTGAG-TGGTGTGATTCTGATCAGA  
TAG--GTACTAACTAAAAAA-TA---AA-CTTCTTAGAGGGACTACCT-ACCTCAAGTGG  
GGGG-AAGTCGGAGGCAATAACAGGTCTGTGATGCCCTTAGATACCTT-GGGCTGCACGC  
GCGTTACAATGTAGACGAGAAAAAGGT----CTCC-----GGCACC GA-AAG---GT  
GTC-GGTAATCATATGAATTGTCTACGTAATGGGGATTA-ATTTTTGTAATTATCGATTA  
TCAACGAGGAATTCCTTGTAAAGCGTAAATCATTACTTTGCGCTGAATATGTCCCTGCCCT  
TTGTACACACCGCCCGTCGCTCTACCGATCGAACGATTAGGTAAAACTGACAGACTG--

--AGT-GACTTC--C----CGC-A-AGG-GATTGTT-----GTT-TGG-AAAG--TTA  
-GT-TAAATCT--C----ATT--GTTT  
>AM168106.1\_Heterostelium\_tikalense\_OH595  
TCTAAG-TATAA-CCTTTA-TACGGTGAAA----CTGCAGACGGCTCATT--ACAA--CA  
---GT---GATAAACTA-AAGAACCTTTCGC-GCTTC-----GGCGTCTT-GGATAACCG  
CAGTAAATCGGGGCTAATACATGTAAA-CG-AGAGGATGAGCGGG----CAACTGCG-AG  
TCTTTGCGATTGTT----A-GCT-ATT-CA---CACACCAACCTCTTCGGAGTTTGTGGT  
GAGTCCGAACAATATTGCTGATCGGAA-----ATT-TATTTCCGACAAGTTCTTTGT  
GTCACCTGCCCTATCAACTTTCGATGGTAAGGTATTGGCTTACCATGGTTGTAACGGGTGA  
CGGGGAATCAGGGTTCGATTCGGGAGAGGGAGCCTGAGAAATGGCTACCCTTCTATGGA  
AGGCAGCAGGCGCGCAAATT-ACTCAATCCCAATAC-GGGGAAGTAGTGACAAAAAATAC  
TAATGCCTTTCCATTTATATGGGGG--GCAATTGGAATAAGTACAACCTTAAATCGCTTAG  
CA-AAAGTGATTGGAGGGCAAGTCTGGTGCCAGCAGCCGCGGTAATACCAGCTCCAA-TA  
GCGTATACTAAAATTTGTTCAGCTTAAAA-AGC-TCGTAGTTGAGATTGAGATTCTTG-G  
GT-TTAG--CAGGCATTGTCGCCTT--CGGGTTGGCA--A-TCGT-TTGTAAGCGCTAT  
AATGGAATTTT-CTTTTCA-TTATATGTGTTA-CCAAGAAATTTCCAACCTGC-CCA--TG  
TCAAGTGGCAACACTTG--TCTGATA--GGGTGATCTACTGTGAGAAAA-TTGTAGTGTT  
CAAAGCA--GG-C---GTC---TTACGTTTGTTCATGCAGCATGGTATAGTAAAAATATG  
ACAC---TAAATATAT-GTTGGTTG-TATA---TTCT-TAGTGAATGACTAATAGGGAA  
GGGCGGGCCGTTCAATTGATGGGCGAGAGGTGAAATTCGTTGACCCTATCAAGATGCA  
CTACAGCGAAAGCATTTCGGCAAGTACTTCTCCATTAATCAAGAACGAAAAGTTTGGGGATC  
GAAGACGATCAGATACCGTCGTAGTCCAAACCATAAACTATGTGACCCAGGGATTGGACG  
GATAAT-TTTTTAAAAACTCGCTCAGAACCTT-GTGAGAAATCAT-GAGTGTGGACTC  
TGGGGGGAGTATGGTTCGCAAGTCTGAAACTTAAAGGAATTGACGGAAGGGCACACAATGG  
AGTGGAA-CCTGCGGCTTAATTT-GACTCAACTCGGGAAA-CTTACCAAGCTCAGATAT  
AATAAGGATTGACAGA-CTAA-AAGATCTTTCATGATTGTATAAGTGGTGGTGCATGGTC  
GTTCTTAG-TTGGTGGAGTGATTGTCTGGTCAATTCCGATAACGGACGAGACCTTACC  
TGCTAACTAGTGGTATTTTATTTGGTCAATATGGGAGATAGCTATT-TGGTGTGGCAGTC  
AGG----GTCAA---CTTG---ATTGCTTTCATTGAG-TGGTGTGTATTCTGATCAGA  
TAG--GTACTAACTAAAAAA-TA---AA-CTTCTTAGAGGGACTACCT-ACCTCAAGTGG  
GGGG-AAGTCGGAGGCAATAACAGGTCTGTGATGCCCTTAGATACCTT-GGGCTGCACGC  
GCGTTACAATGTAGACGAGAAAAAGGT----CTCC-----GGCACCGA-AAG---GT  
GTC-GGTAATCATATGAATTGTCTACGTAATGGGGATTA-ATTTTTGTAATTATCGATTA  
TCAACGAGGAATTCCTTGTAAAGCGTAAATCATTACTTTGCGCTGAATATGTCCTGCCCT  
TTGTACACACCGCCCGTCTCCTACCGATCGAACGATTAGGTA AAAACTGACAGACTG--  
--AGT-GACTTC--C----CGC-A-AGG-GATTGTT-----GTT-TGG-AAAG--TTA  
-GT-TAAATCT--C----ATT--GTTT  
>KP167475.1\_Heterostelium\_plurimicrocystogenum  
TCTAAG-TATAA-CCTTTA-TACGGTGAAA----CTGCAGACGGCTCAAT--ACAA--CA  
---GT---GATAAACTA-AAGAACCTTTCGC-GCTTC-----GGCGTCTT-GGATAACCG  
CAGTAAATCGGGGCTAATACATGTAAA-CG-AGAGGATGAGCGGG----CAACTGCG-AG  
TCTTTGCGATTGTT----A-GCT-ATT-CA---CACACCAACCTCTTCGGAGTTTGTGGT  
GAGTCCGAACAATATTGCTGATCGGAA-----ATT-TATTTCCGACAAGTTCTTTGT  
GTCACCTGCCCTATCAACTTTCGATGGTAAGGTATTGGCTTACCATGGTTGTAACGGGTGA  
CGGGGAATCAGGGTTCGATTCGGGAGAGGGAGCCTGAGAAATGGCTACCCTTCTATGGA  
AGGCAGCAGGCGCGCAAATT-ACTCAATCCCAATAC-GGGGAAGTAGTGACAAAAAATAC  
TAATGCCTTTCCATTTATATGGGGG--GCAATTGGAATAAGTACAACCTTAAATCGCTTAG  
CA-AAAGTGATTGGAGGGCAAGTCTGGTGCCAGCAGCCGCGGTAATTCAGCTCCAA-TA  
GCGTATACTAAAATTTGTTCAGCTTAAAA-AGC-TCGTAGTTGAGATTGAGATTCTTG-G  
GT-TTAG--CAGGCATTGTCGCCTT--CGGGTTGGCA--A-TCGT-TTGTAAGCGCTAT  
AATGGAATTTT-CTTTTCA-TTATATGTGTTA-CCAAGAAATTTCCAACCTGC-CCA--TG  
TCAAGTGGCAACACTTG--TCTGATA--GGGTGATCTACTGTGAGAAAA-TTGTAGTGTT  
CAAAGCA--GG-C---GTC---TTACGTTTGTTCATGCAGCATGGTATAGTAAAAATAAG  
ACAC---TAAATATAT-GTTGGTTG-TATA---TTCT-TAGTGAATGACTAATAGGGAA  
GGGCGGGGCCGTTCAATTGATGGGCGAGAGGTGAAATTCGTTGACCCTATCAAGATGCA  
CTACAGCGAAAGCATTTCGGCAAGTACTTCTCCATTAATCAAGAACGAAAAGTTTGGGGATC  
GAAGACGATCAGATACCGTCGTAGTCCAAACCATAAACTATGTGACCCAGGGATTGGACG  
GATAAT-TTTTTAAAAACTCGCTCAGAACCTT-GTGAGAAATCAT-GAGTGTGGACTC  
TGGGGGGAGTATGGTTCGCAAGTCTGAAACTTAAAGGAATTGACGGAAGGGCACACAATGG  
AGTGGAA-CCTGCGGCTTAATTT-GACTCAACTCGGGAAA-CTTACCAAGCTCAGATAT  
AATAAGGATTGACAGA-CTAA-AAGATCTTTCATGATTGTATAAGTGGTGGTGCATGGTC  
GTTCTTAG-TTGGTGGAGTGATTGTCTGGTCAATTCCGATAACGGACGAGACCTTACC  
TGCTAACTAGTGGTATTTTATTTGGTCAATATGGGAGATAGCTATT-TGGTGTGGCAGTC  
AGG----GTCAA---CTTG---ATTGCTTTCATTGAG-TGGTGTGTATTCTGATCAGA  
TAG--GTACTAACTAAAAAA-TA---AA-CTTCTTAGAGGGACTACCT-ACCTCAAGTGG  
GGGG-AAGTCGGAGGCAATAACAGGTCTGTGATGCCCTTAGATACCTT-GGGCTGCACGC  
GCGTTACAATGTAGACGAGAAAAAGGT----CTCC-----GGCACCGA-AAG---GT  
GTC-GGTAATCATATGAATTGTCTACGTAATGGGGATTA-ATTTTTGTAATTATCGATTA  
TCAACGAGGAATTCCTTGTAAAGCGTAAATCATTACTTTGCGCTGAATATGTCCTGCCCT  
TTGTACACACCGCCCGTCTCCTACCGATCGAACGATTAGGTA AAAACTGACAGACTG--  
--AGT-GGCTTC--T-----  
-----C-----  
>KP167472.1\_Heterostelium\_pseudoplasmodiomagnum

TCTAAG-TATAA-CCTTTA-TACGGTGAAA----CTGCAGACGGATCAAT--ACAA--CA  
---GT---GATAAACTA-AAGAACTTTCGC-GCTTC-----GGCGTCTT-GGATAACCG  
CAGTAAATCGGGGCTAATACATGTAAA-CG-AGAGGATGAGCGGG----CAACTGCG-AG  
TCTTTGCGATTGTT---A-GCT-ATT-CA---CACACCAACCTCTTCGGAGTTTGTGGT  
GAGTCCGAACAATATTGCTGATCGGAA-----ATT-TATTTCCGACAAGTTCTTTGT  
GTCACTGCCCTATCAACTTTCGATGGTAAGGTATTGGCTTACCATGGTTGTAACGGGTGA  
CGGGGAATCAGGGTTCGATTCCGGAGAGGGAGCCTGAGAAAATGGCTACCACTTCTATGGA  
AGGCAGCAGGCGCGCAAATT-ACTCAATCCCAATAC-GGGGAAGTAGTGACAAAAAATAC  
TAATGCCTTTCCATTTATATGGGGG--GCAATTGGAATAAGTACAACCTTAAATCGCTTAG  
CA-AAAGTGATTGGAGGGCAAGTCTGGTGCCAGCAGCCGCGGTAATTCCAGCTCCAA-TA  
GCGTATACTAAAATTTGTTGCAGTTAAAA-AGC-TCGTAGTTGAGATTGAGATTCTTG-G  
GT-TTAG--CAGGCATTGTGCCTT--CGGGTTGGCA--A-TCGT-TTGTAAGCGCTAT  
AATGGAATTTT-ACCTTCA-TTATATGTGTTA-CCAAGAAATTTCCAACCTGC-CCA--TG  
TCAAGTGGCAACACTTG--TCTGATA--GGGTGATCTACTGTGAGAAAA-TTGTAGTGT  
CAAAGCA--GG-C--GTC--TTACGTTTGTTCATGCAGCATGGTATAGTAAAAAAG  
ACAC--TAAATATAT-GTTGGTTG-TATA---TTCT-TAGTGTAATGACTAATAGGGAA  
GGGCGGGGCCGTTCAATTGATGGGCGAGAGGTGAAATTCGTTGACCCTATCAAGATGCA  
CTACAGCGAAAGCATTCCGCAAGTACTTCTCCATTAATCAAGAACGAAAAGTTTGGGGATC  
GAAGACGATCAGATCCGCTAGTCCAAACCATAAACTATGTCGACCAGGGATTGGACG  
GATAAT-TTTTTAAAAACTCGCTCAGAACCTT-GTGAGAAATCAT-GAGTGTGGACTC  
TGGGGGAGTATGGTCGCAAGTCTGAAACTTAAAGGAATTGACGGAAGGGCACACAATGG  
AGTGGAA-CCTGCGGCTAATTT-GACTCAACTCGGGAAA-ACTTACCAAGCTCAGATAT  
AATAAGGATTGACAGA-CTAA-AAGATCTTTCATGATTGTATAAGTGGTGGTGCATGGTC  
GTTCTTAG-TTGGTGGAGTGATTGTCTGGTCAATTCCGATAACGGACGAGACCTTACC  
TGCTAACTAGTGGTATTTATTTGGTCAATATGGGAGATAGCTATT-TGGTGTGGCAGTC  
AGG---GTCAAA---CTTG---ATTGTCCTTCATTGAG-TGGTGTGTATTCTGATCAGA  
TAG--GTACTAACTAAAAAA-TA---AA-CTTCTTAGAGGGACTACCT-ACCTCAAGTGG  
GGGG-AAGTCGGAGGCAATAACAGGTCTGTGATGCCCTTAGATACCTT-GGGCTGCACGC  
GCGTTACAATGTAGACGAGAAAAAGGT----CTCC-----GGCACCGA-AAG---GT  
GTC-GGTAATCATATGAATTGTCTACGTAATGGGGATTA-ATTTTTGTAATTATCGATTA  
TCAACGAGGAATTCCTTGTAAAGCGTAAATCATTACTTTGCGCTGAATATGTCCTGCCCT  
TTGTACACACCGCCCGTCTCCTACCGATCGAACGATTAGGTA AAAACTGACAGACTG--  
--AGT-GGCTTC--T-----

>KP167473.1 *Heterostelium unguiferum*

TCTAAG-TATAA-CCTTTA-TACGGTGAAA----CTGCAGACGGATCAAT--ACAA--CA  
---GT---GATAAACTA-AAGAACTTTCGC-GCTTC-----GGCGTCTT-GGATAACCG  
CAGTAAATCGGGGCTAATACATGTAAA-CG-AGAGGATGAGCGGG----CAACTGCG-AG  
TCTTTGCGATTGTT---A-GCT-ATT-CA---CACACCAACCTCTTCGGAGTTTGTGGT  
GAGTCCGAACAATATTGCTGATCGGAA-----ATT-TATTTCCGACAAGTTCTTTGT  
GTCACTGCCCTATCAACTTTCGATGGTAAGGTATTGGCTTACCATGGTTGTAACGGGTGA  
CGGGGAATCAGGGTTCGATTCCGGAGAGGGAGCCTGAGAAAATGGCTACCACTTCTATGGA  
AGGCAGCAGGCGCGCAAATT-ACTCAATCCCAATAC-GGGGAAGTAGTGACAAAAAATAC  
TAATGCCTTTCCATTTATATGGGGG--GCAATTGGAATAAGTACAACCTTAAATCGCTTAG  
CA-AAAGTGATTGGAGGGCAAGTCTGGTGCCAGCAGCCGCGTAAATCCAGCTCCAA-TA  
GCGTATACTAAAATTTGTTGCAGTTAAAA-AGC-TCGTAGTTGAGATTGAGATTCTTG-G  
GT-TTAG--CAGGCATTGTGCCTT--CGGGTTGGCA--A-TCGT-TTGTAAGCGCTAT  
AATGGAATTTT-ACCTTCA-TTATATGTGTTA-CCAAGAAATTTCCAACCTGC-CCA--TG  
TCAAGTGGCAACACTTG--TCTGATA--GGGTGATCTACTGTGAGAAAA-TTGTAGTGT  
CAAAGCA--GG-C--GTC--TTACGTTTGTTCATGCAGCATGGTATAGTAAAAAAG  
ACAC--TAAATATAT-GTTGGTTG-TATA---TTCT-TAGTGTAATGACTAATAGGGAA  
GGGCGGGGCCGTTCAATTGATGGGCGAGAGGTGAAATTCGTTGACCCTATCAAGATGCA  
CTACAGCGAAAGCATTCCGCAAGTACTTCTCCATTAATCAAGAACGAAAAGTTTGGGGATC  
GAAGACGATCAGATACCGCTGATGGTAAACCATAAACTATGTCGACCAGGGATTGGACG  
GATAAT-TTTTTAAAAACTCGCTCAGAACCTT-GTGAGAAATCAT-GAGTGTGGACTC  
TGGGGGAGTATGGTCGCAAGTCTGAAACTTAAAGGAATTGACGGAAGGGCACACAATGG  
AGTGGAA-CCTGCGGCTAATTT-GACTCAACTCGGGAAA-ACTTACCAAGCTCAGATAT  
AATAAGGATTGACAGA-CTAA-AAGATCTTTCATGATTGTATAAGTGGTGGTGCATGGTC  
GTTCTTAG-TTGGTGGAGTGATTGTCTGGTCAATTCCGATAACGGACGAGACCTTACC  
TGCTAACTAGTGGTATTTATTTGGTCAATATGGGAGATAGCTATT-TGGTGTGGCAGTC  
AGG---GTCAAA---CTTG---ATTGTCCTTCATTGAG-TGGTGTGTATTCTGATCAGA  
TAG--GTACTAACTAAAAAA-TA---AA-CTTCTTAGAGGGACTACCT-ACCTCAAGTGG  
GGGG-AAGTCGGAGGCAATAACAGGTCTGTGATGCCCTTAGATACCTT-GGGCTGCACGC  
GCGTTACAATGTAGACGAGAAAAAGGT----CTCC-----GGCACCGA-AAG---GT  
GTC-GGTAATCATATGAATTGTCTACGTAATGGGGATTA-ATTTTTGTAATTATCGATTA  
TCAACGAGGAATTCCTTGTAAAGCGTAAATCATTACTTTGCGCTGAATATGTCCTGCCCT  
TTGTACACACCGCCCGTCTCCTACCGATCGAACGATTAGGTA AAAACTGACAGACTG--  
--AGT-GGCTTC--T-----

>HQ141504.1 *Heterostelium* sp. TH12A

TCTAAG-TATAA-CCTTTA-TACGGTGAAC----CTGCAGAGGATCAAT--ACGAG-CA  
---GT---GATAAACTA-AAGAACTTTCGC-GCTTC-----GGCGTCTT-GGATAACCG  
CAGTAAATCGGGGCTAATACATGTAAA-CG-AGAGGATGAGCGGG----TAACCGCG-AG

TCTTTGCGATTGTT----A-GCT-TTTACA---CACACCAACCTCTTCGGAGATTGTGGT  
GAGTCCGAACAATATTGCTGATCGGAA-----ATT-TATTTCCGACGAGTCTTTTGT  
GTCAGTCCCTATCAACTTTCGATGGTAAGGTATTGGCTTACCATGGTTGTAACGGGTGA  
CGGGGAATCAGGGTTCGATTCGGGAGAGGGAGCCTGAGAAATGGCTACCACTTCTATGGA  
AGGCAGCAGGCGCGCAAATT-ACTCAATCCCAATAC-GGGGAAGTAGTGACAAAAAATAC  
TAATGCCTTACCATTATATGGGGG--GCAATTGGAATAAGTACAACCTAAATCGCTTAG  
CA-AAAGTGATTGGAGGGCAAGTCTGGTGCCAGCAGCCGCGGTAATTCCAGCTCCAA-TA  
GCGTATACTAAATTTGTTGCAGTTAAAA-AGC-TCGTAGTTGAGATTGAGATTTCTTG-G  
GT-TTAG--CGTTCATTATTGCCTT--CGGGT-AATA--A-CCGT-TCGTAAGACT-TAT  
AATCGGGATT--GTTTCG-TT-TATGAGTTA-CCAAGAAATTTCTATATGC-CCA--TG  
TCAACTGGTAACAGTTG--TCTGATC--GGGTGATCTACTGTGAGAAAA-TTGTAGTGT  
CAAAGCA--GG-C---GTC---TTTCGCTTGTCAATGCAGCATGGTATAGTAAAAAAG  
ACAC---TAAATATAT-GTTGGTTG-TATA---TTCT--AGTGAATGACTAATAGGGAA  
GGGCGGGCCGTTCAATTGATGGGCGAGAGGTGAAATTCGTTGACCCTATCAAGATGCA  
CTACAGCGAAAGCATTTCGGCAAGTACTTCTCCATTAATCAAGAACGAAAGTTTGGGGATC  
GAAGACGATCAGATACCGTCTGATGCCAAACCATAAACTATGTCGACCAGGGATTGGACG  
GATAAT-TTTTTAAAAACTCGCTCAGAACCTT-GTGAGAAATCAT-GAGTGTGGACTC  
TGGGGGGAGTATGGTCGCAAGTCTGAACTTAAAGGAATTGACGGAAGGGCACACAATGG  
AGTGGA-CCTGCGGCTTAATTT-GACTCAACTCGGGAAA-ACTTACCAAGCTCAGATAT  
AATAAGGATTGACAGA-CTAA-AAGATCTTTCATGATTGTATAAGTGGTGGTGCATGGTC  
GTTCTTAG-TTGGTGGAGTGATTTGTCTGGTCAATTCCGATAACGGACGAGACCTTACC  
TACTAAATAGTGGTATTTATTTGGTCAACATGGAAGATAGTCATT-TGGTGTGGC-GTT  
AGGT---GTCAAA--GCTTA--GC-GTTCATTGAG-TGGTGTGATTTTCGATCAGA  
TAG--GTACTAACTAAAAAA-TA---AA-CTTCTTAGAGGGACTACCT-ACCTCAAGTGG  
GGGG-AAGTCGGAGGCAATAACAGGTCTGTGATGCCCTTAGATACCTT-GGGCTGCACGC  
GCGTTACAATGTAGACTAGAAAAAGGT----TTCC-----GACATCGA-AAG---GT  
GCC-GGTAATCAATTGAATAGTCTACGTAATGGGGATTA-ATTTTTGTAATTATCGATTA  
TCAACGAGGAATTCCTTGTAAAGCGTAAATCATTACTTTACGCTGAATATGTCCTGCCCT  
TTGTACACACCGCCCGTCTCTACCGATCGAACGATTAGGTAATAACTGACGGACTG--  
--AAT-GACTTC--T---AAC-C-TGG---TTG-----GT-GAACC--TG  
-CA-GAAGGAT--C--AGATCCTGCC-

>HQ141498.1 *Heterostelium candidum*\_bsb6b

TCTAAG-TATAA-CCTTTA-TACGGTGAAC----CTGCAGAAGGATCAAC---CA---G-  
---GTT-AGATAAACTA-AAGAAGTTTCGC-GCTC-----GGCGTCTT-GGATAACCG  
CAGTAAATCGGGGCTAATACATGTAAA-CG-AGAGGATGAGCGGG---TAACCGCG-AG  
TCTTTGCGATTGTT----A-GCT-TTTACA---CACACCAACCTCTTCGGAGATTGTGGT  
GAGTCCGAACAATATTGCTGATCGGAA-----ATT-TATTTCCGACGAGTCTTTTGT  
GTCAGTCCCTATCAACTTTCGATGGTAAGGTATTGGCTTACCATGGTTGTAACGGGTGA  
CGGGGAATCAGGGTTCGATTCGGGAGAGGGAGCCTGAGAAATGGCTACCACTTCTATGGA  
AGGCAGCAGGCGCGCAAATT-ACTCAATCCCAATAC-GGGGAAGTAGTGACAAAAAATAC  
TAATGCCTTACCATTATATGGGGG--GCAATTGGAATAAGTACAACCTAAATCGCTTAG  
CA-AAAGTGATTGGAGGGCAAGTCTGGTGCCAGCAGCCGCGGTAATTCCAGCTCCAA-TA  
GCGTATACTAAATTTGTTGCAGTTAAAA-AGC-TCGTAGTTGAGATTGAGATTTCTTG-G  
GT-TTAG--CGTTCATTATTGCCTT--CGGGT-AATA--A-CCGT-TCGTAAGACT-TCT  
AATCGGGATT--GTTTCG-TT-TAGGAGTTA-CCAAGAAATTTCTATATGC-CCA--TG  
TCAACTGGTAACAGTTG--TCTGATC--GGGTGATCTACTGTGAGAAAA-TTGTAGTGT  
CAAAGCA--GG-C---GTC---TTTCGCTTGTCAATGCAGCATGGTATAGTAAAAAAG  
ACAC---TAAATATAT-GTTGGTTG-TATA---TTCT--AGTGAATGACTAATAGGGAA  
GGGCGGGCCGTTCAATTGATGGGCGAGAGGTGAAATTCGTTGACCCTATCAAGATGCA  
CTACAGCGAAAGCATTTCGGCAAGTACTTCTCCATTAATCAAGAACGAAAGTTTGGGGATC  
GAAGACGATCAGATACCGTCTGATGCCAAACCATAAACTATGTCGACCAGGGATTGGACG  
GATAAT-TTTTTAAAAACTCGCTCAGAACCTT-GTGAGAAATCAT-GAGTGTGGACTC  
TGGGGGGAGTATGGTCGCAAGTCTGAACTTAAAGGAATTGACGGAAGGGCACACAATGG  
AGTGGA-CCTGCGGCTTAATTT-GACTCAACTCGGGAAA-ACTTACCAAGCTCAGATAT  
AATAAGGATTGACAGA-CTAA-AAGATCTTTCATGATTGTATAAGTGGTGGTGCATGGTC  
GTTCTTAG-TTGGTGGAGTGATTTGTCTGGTCAATTCCGATAACGGACGAGACCTTACC  
TACTAAATAGTGGTATTTATTTGGTCAACATGGAAGATAGTCATT-TGGTGTGGC-GTT  
AGGT---GTCAAA--GCTTA--GC-GTTCATTGAG-TGGTGTGATTTTCGATCAGA  
TAG--GTACTAACTAAAAAA-TA---AA-CTTCTTAGAGGGACTACCT-ACCTCAAGTGG  
GGGG-AAGTCGGAGGCAATAACAGGTCTGTGATGCCCTTAGATACCTT-GGGCTGCACGC  
GCGTTACAATGTAGACTAGAAAAAGGT----TTCC-----GACATCGA-AAG---GT  
GCC-GGTAATCAATTGAATAGTCTACGTAATGGGGATTA-ATTTTTGTAATTATCGATTA  
TCAACGAGGAATTCCTTGTAAAGCGTAAATCATTACTTTACGCTGAATATGTCCTGCCCT  
TTGTACACACCGCCCGTCTCTACCGATCGAACGATTAGGTAATAACTGACGGACTG--  
--AAT-GAACTC--TT---AAC-C-TGG---TTGAT-----CC--GGT-GAACC--TG  
-CA-GAAGGAT--C---A---TGCC

>AY040337.1 *Heterostelium candidum*

TCTAAG-TATAA-CCTTTA-TACGGTGAAC----CTGCAGACGGCTCATT--ACAA--CA  
---GT---GATAAACTA-AAGAAGTTTCGC-GCTC-----GGCGTCTT-GGATAACCG  
CAGTAAATCGGGGCTAATACATGTAAA-CG-AGAGGATGAGCGGG---TAACCGCG-AG  
TCTTTGCGATTGTT----A-GCT-TTTACA---CACACCAACCTCTTCGGAGATTGTGGT  
GAGTCCGAACAATATTGCTGATCGGAA-----ATT-TATTTCCGACGAGTCTTTTGT  
GTCAGTCCCTATCAACTTTCGATGGTAAGGTATTGGCTTACCATGGTTGTAACGGGTGA

CGGGGAATCAGGGTTCGATTCCGGAGAGGGAGCCTGAGAAATGGCTACCACCTTCTATGGA  
AGGCAGCAGGCGCGCAAATT-ACCTAATCCCAATAC-GGGGAAGTAGTGACAAAAAATAC  
TAATGCCTTACCATTTATATGGGGG--GCAATTGGAATAAGTACAACCTAAATCGCTTAG  
CA-AAAGTGATTGGAGGGCAAGTCTGGTGCCAGCAGCCGCGTAATTCCAGCTCCAA-TA  
GCGTATACTAAAATTTGTTCGAGTTAAAA--GC-TCGTAGTTGAGATTGAGATTTCTTG-G  
GT-TTAG--CGTTCATTATTGCCTT--CGGGT-AATA--A-CCGT-TCGTAAAGCT-TCT  
AATCGGGATTG--GTTTCG-TT-TAGGAGTTA-CCAAGAAATTTCTATATGC-CCA--TG  
TCAACTGGTAACAGTTG--TCTGATC--GGGTGATCTACTGTGAGAAAA-TTGTAGTGT  
CAAAGCA--GG-C---GTC---TTTCGCTTGTCAATGCAGCATGGTATAGTAAAAATAAG  
ACAC---TAAATATAT-GTTGGTTG-TATA---TTCT--AGTGAATGACTAATAGGGAA  
GGGCGGGGCCGTTTCATATTGATGGGCGAGAGGTGAAATTCGTTGACCCTATCAAGATGCA  
CTACAGCGAAAGCATTTCGGCAAGTACTTCTCCATTAATCAAGAACGAAAAGTTTGGGGATC  
GAAGACGATCAGATACCGTCTGATGCCAAACCATAAACTATGTGACACAGGGATTGGACG  
GATAAT-TTTTTAAAAAATCGCTCAGAACCCTT-GTGAGAAATCAT-GAGTGTGGACTC  
TGGGGGAGTATGGTTCGCAAGTCTGAAACTTAAAGGAATTGACGGAAGGGCACACAATGG  
AGTGGAA-CCTGCGGCTTAATTT-GACTCAACTCGGGAAA-ACTTACCAAGCTCAGATAT  
AATAAGGATTGACAGA-CTAA-AAGATCTTTCATGATTGTATAAGTGGTGGTGCATGGTC  
GTTCTTAG-TTGGTGGAGTGATTTGTCTGGTCAATTCCGATAACGGACGAGACCTTACC  
TACTAAATAGTGGTATTTTGGTCAACATGGAAGATAGTCATT-TGGTGTGGC-GTT  
AGGT--GTCAAA--GCTTA---GC-GTTCCTATTGAG-TGGTGTGATTTTCGATCAGA  
TAG--GTACTAACTAAAAAA-TA---AA-CTTCTTAGAGGGACTACCT-ACCTCAAGTGG  
GGGG-AAGTCGGAGGCAATAACAGGTCTGTGATGCCCTTAGATACCTT-GGGCTGCACGC  
GCGTTACAATGTAGACTAGAAAAAGGT----TTCC-----GACATCGA-AAG---GT  
GCC-GGTAATCAATTGAATAGTCTACGTAATGGGGATTA-ATTTTTGTAATTATCGATTA  
TCAACGAGGAATTCCTTGTAAAGCGTAAATCATTACTTTACGCTGAATATGTCCCTGCCCT  
TTGTACACACCGCCCGTCTCTACCGATCGAACGATTAGGTAAAAATGACGGACTG--  
--AAT-GACTTC--T---CGC-A-AGG-GATTGTC-----GTT-TGG-AAAG--TTA  
-GT-TAAATCT--C---ATT--GTTT

>AM168100.1 *Heterostelium filamentosum* SU\_1

TCTAAG-TATAA-CCTTTA-TACGGTGAAA---CTGCAGACGGCTCATT--ACAA--CA  
---GT---GATAAACTA-AAGAACTTTCGC-GCTTC-----GGCGTCTT-GGATAACCG  
CAGTAAATCGGGGCTAATACATGTAAA-CG-AGAGGATGAGCGGG---CAACCGCG-AG  
TCTTTGCGATTGTT---A-GCT-TTTACA---CACACCAACCTCCTCGGAGATTGTGGT  
GAGTCCGAACAATATTGCTGATCGGAA-----ATT-TATTTCGACGAGTCTTTGT  
GTCACTGCCCTATCAACTTTCGATGGTAAGGTATTGGCTTACCATGGTTGTAACGGGTGA  
CGGGGAATCAGGGTTCGATTCCGGAGAGGGAGCCTGAGAAATGGCTACCACCTTCTATGGA  
AGGCAGCAGGCGCGCAAATT-ACCTAATCCCAATAC-GGGGAAGTAGTGACAAAAAATAC  
TAATGCCTTACCATTT-TATGGGGG--GCAATTGGAATAAGTACAACCTAAATCGCTTAG  
CA-AAAGTGATTGGAGGGCAAGTCTGGTGCCAGCAGCCGCGTAATTCCAGCTCCAA-TA  
GCGTATACTAAAATTTGTTCGAGTTAAAA-AGC-TCGTAGTTGAGATTGAGATTTCTTG-G  
GT-TTAG--CGTTCATTATTGCCT-CAC-GGT-AATA--A-CCGT-TCGTAAAGCTTT-T  
AATCGGGACTC--GTTTCG-TT-TAAGAGTTA-CCAAGAAATTTCTATATGC-CCA--TG  
TCAACTGGTAACAGTTG--TCTGATC--GGGTGATCTACTGTGAGAAAA-TTGTAGTGT  
CAAAGCA--GG-C---GTC---TTTCGCTTGTCAATGCAGCATGGTATAGTAAAAATAAG  
ACAC---TAAATATAT-GTTGGTTG-TATA---TTCT--AGTGAATGACTAATAGGGAA  
GGGCGGGGCCGTTTCATACTGATGGGCGAGAGGTGAAATTCGTTGACCCTATCAAGATGCA  
CTACAGCGAAAGCATTTCGGCAAGTACTTCTCCATTAATCAAGAACGAAAAGTTTGGGGATC  
GAAGACGATCAGATAACCGTCTGATGCCAAACCATAAACTATGTGACACAGGGATTGGACG  
GATAAT-TTTTTAAAAAATCGCTCAGAACCCTT-GTGAGAAATCAT-GAGTGTGGACTC  
TGGGGGAGTATGGTTCGCAAGTCTGAAACTTAAAGGAATTGACGGAAGGGCACACAATGG  
AGTGGAA-CCTGCGGCTTAATTT-GACTCAACTCGGGAAA-ACTTACCAAGCTCAGATAT  
AATAAGGATTGACAGA-CTAA-AAGATCTTTCATGATTGTATAAGTGGTGGTGCATGGTC  
GTTCTTAG-TTGGTGGAGTGATTTGTCTGGTCAATTCCGATAACGGACGAGACCTTACC  
TACTAAATAGTGGTATTTTATTTGGTCAACATGGAAGATAGTCATT-TGGTGTGGC-GTT  
AGGT--GTCAAA--GCTTA---GC-GTTCCTATTGAG-TGGTGTGATTTTCGATCAGA  
TAG--GTACTAACTAAAAAA-TA---AA-CTTCTTAGAGGGACTACCT-ACCTCAAGTGG  
GGGG-GAGTCGGAGGCAATAACAGGTCTGTGATGCCCTTAGATACCTT-GGGCTGCACGC  
GCGTTACAATGTAGACTAGAAAAAGGT----TTCC-----GACATCGA-AAG---GT  
GCC-GGTAATCAATTGAATAGTCTACGTAATGGGGATTA-ATTTTTGTAATTATCGATTA  
TCAACGAGGAATTCCTTGTAAAGCGTAAATCATTACTTTACGCTGAATATGTCCCTGCCCT  
TTGTACACACCGCCCGTCTCTACCGATCGAACGATTAGGTAAAAATGACGGACTG--  
--AAT-GACTTC--T---CGC-A-AGG-GATTGTC-----GTT-TGG-AAAG--TTA  
-GT-TAAATCT--C---ATT--GTTT

>AM168101.1 *Heterostelium luridum* LR\_2

TCTAAG-TATAA-CCTTTA-TACGGTGAAA---CTGCAGACGGCTCATT--ACAA--CA  
---GT---GATAAACTA-AAGAACTTTCGC-GCTTC-----GGCGTCTT-GGATAACCG  
CAGTAAATCGGGGCTAATACATGTAAA-CG-AGAGGATGAGCGGG---CAACCGCG-AG  
TCTTTGCGATTGTT---A-GCT-TTTACA---CACACCAGCCTCCTCGGAGATTGTGGT  
GAGTCCGAACAATATTGCTGATCGGAA-----ATT-TATTTCGACGAGTCTTTGT  
GTCACTGCCCTATCAACTTTCGATGGTAAGGTATTGGCTTACCATGGTTGTAACGGGTGA  
CGGGGAATCAGGGTTCGATTCCGGAGAGGGAGCCTGAGAAATGGCTACCACCTTCTATGGA  
AGGCAGCAGGCGCGCAAATT-ACCTAATCCCAATAC-GGGGAAGTAGTGACAAAAAATAC  
TAATGCCTTACCATTT-TATGGGGG--GCAATTGGAATAAGTACAACCTAAATCGCTTAG

CA-AAAGTGATTGGAGGGCAAGTCTGGTGCCAGCAGCCGCGGTAATTCCAGCTCCAA-TA  
GCGTATACTAAATTTGTTGCAGTTAAAA-AGC-TCGTAGTTGAGATTGAGATTCTTG-G  
GT-TTAG--CGTTCATTATTGCCT-CAC-GGT-AATA--A-CCGT-TCGTAAGCTTTT-T  
AATCGGGACTC--GTTTCG-TT-TAAGAGTTA-CCAAGAAATTTCTATATGC-CCA--TG  
TCAACTGGTAACAGTTG--TCTGATC--GGGTGATCTACTGTGAGAAAA-TTGTAGTGT  
CAAAGCA--GG-C---GTC---TTTCGCTTGTTCATGCAGCATGGTATAGTAAAAATAAG  
ACAC---TAAATATAT-GTTGGTTG-TATA---TTCT--AGTGAATGACTAATAGGGAA  
GGGCGGGGCCGTTCAATTGATGGGCGAGAGGTGAAATTCGTTGACCCTATCAAGATGCA  
CTACAGCGAAAGCATTGCGCAAGTACTTCTCCATTAATCAAGAACGAAAAGTTTGGGGATC  
GAAGACGATCAGATACCGTCGTAGTCCAAACCATAAACTATGTGACCCAGGGATTGGACG  
GATAAT-TTTTTAAAAAAGTCTGCTCAGAACCTT-GTGAGAAATCAT-GAGTGTGGACTC  
TGGGGGGAGTATGGTCGCAAGTCTGAAACTTAAAGGAATTGACGGAAGGGCACACAATGG  
AGTGGAA-CCTGCGGCTTAATTT-GACTCAACTCGGGAAA-ACTTACCAAGCTCAGATAT  
AATAAGGATTGACAGA-CTAA-AAGATCTTTTCATGATTGTATAAGTGGTGGTGCATGGTC  
GTTCTTAG-TTGGTGGAGTGAATTTGTCTGGTCAATTCCGATAACGGACGAGACCTTACC  
TACTAAATAGTGGTATTTATTTGGTCAACATGGAAGATAGTCATT-TGGTGTGGC-GTT  
AGGT--GTCAAA--GCTTA--GC-GTTCTTCATTGAG-TGGTGTGATTTTCGATCAGA  
TAG--GTACTAACTAAAAAA-TA---AA-CTTCTTAGAGGGACTACCT-ACCTCAAGTGG  
GGG-AAGTCAGAGGCAATAACAGGTCTGTGATGCCCTTAGATACCTT-GGGCTGCACGC  
GCGTTACAATGTAGATGAGAAAAAGGT----TTCC-----GACATCGA-AAG---GT  
GCC-GGTAATCAATTGAATAGTCTACGTAATGGGGATTA-ATTTTTGTAATTATCGATTA  
TCAACGAGGAATTCCTTGTAAAGCGTAAATCATTACTTTACGCTGAATATGTCCTGCCC  
TTGTACACACCGCCCGTCTCCTACCGATCGAACGATTAGGTAATAACTGACGGACTG--  
--AAT-GACTTC-T---CGC-A-AGG-GATTGTC-----GTT-TGG-AAAG--TTA  
-GT-TAAATCT--C---ATT--GTTT

>MN338953.1 *Heterostelium radiatum*\_M26B

TCTAAG-TATAA-CCTTTA-TACGGTGAA----CTG-AGAGGGACACGC---CGG--CA  
---GT---AGATAAACTA-AAGAACTTTCGC-GCTTC-----GGCGTCTT-GGATAACCG  
CAGTAAATCGGGGCTAATACATATAAAA-CG-AGAGGATGAGCAGG----CAACTGCG-AG  
TCTTTGCGATTGTT---A-GCTATCTTTT--CACACCAACCTCCTCGGAGTTTGTGGT  
GAATCCGAACAATATGCTGATCGAAA-----ATT-TATTTTCGACGAGTTCCTTTGT  
GTCACTGCCCTATCAACTTTCGATGGTAAGGTATTGGCTTACCATGGTTGTAACGGGTGA  
CGGGGAATCAGGGTTCGATTCCGGAGAGGGAGCCTGAGAAATGGCTACCCTTCTACGGA  
AGGCAGCAGGCGCGCAAATT-ACTCAATCCCAATAC-GGGGAAGTAGTGACAAAAAATAC  
TAATGCCTTTCCATAT-TATGGGGG--GCAATTGGAATAAGTACAACCTAAATCGCTTAG  
CA-AAAGTGATTGGAGGGCAAGTCTGGTGCCAGCAGCCGCGGTAATTCCAGTCCAA-TA  
GCGTATACTAAATTTGTTGCAGTTAAAA-AGC-TCGTAGTTGAGATTGAGATTCTTG-G  
GT-TTAAGCCAGTTATAGTAGCTTT--CGGGTATTATAA-T--TCGGTAAAGCTCTTG  
AGTGGATTTA-TTTTTCA-CTTTTAGAGTTA-CCAAGGAATTTCCAAGTGC-CCA--TG  
TAGACTGGCAACAGTTT--AC-AATC--GGGTGATCTACTGTGAGAAAA-TTGTAGTGT  
CAAAGCA--GG-C---GTC---TTAAGCTTGTCAATGCAGCATGGTATAGTAAAATATG  
ACAC---TAAATATAT-GTTGGTTG-TATA---TTCT-TAGTGAATGACTAATAGGGAA  
GGGCGGGGCCGTTCAATTGATGGGCGAGAGGTGAAATTCGTTGACCCTATCAAGATGCA  
CTACAGCGAAAGCATTGCGCAAGTACTTCTCCATTAATCAAGAACGAAAAGTTTGGGGATC  
GAAGACGATCAGATACCGTCGTAGTCCAAACCATAAACTATGTGACCCAGGGATTGGACG  
GATAAT-TTTTTAAAAAAGTCTGCTCAGAACCTT-GTGAGAAATCAT-GAGTGTGGACTC  
TGGGGGGAGTATGGTCGCAAGTCTGAAACTTAAAGGAATTGACGGAAGGGCACACAATGG  
AGTGGAA-CCTGCGGCTTAATTT-GACTCAACTCGGGAAA-ACTTACCAAGCTCAGATAT  
AATAAGGATTGACAGA-CTAATAAGATCTTTTCATGATTGTATAAGTGGTGGTGCATGGTC  
GTTCTTAG-TTGGTGGAGTGAATTTGTCTGGTCAATTCCGATAACGGACGAGACCTTACC  
TGCTAACTAGTGGTATTTATTTGGTCAATATGGAAGATAGTCATT-TGGTGTGGT-GTT  
AGGT--GTCAAA--GCTTA--GC-ATTCTTCATTGAG-TGGTGTGATTTCTGGTCAAG  
TAG--GTACTAACTAAAAAA-TA---AA-CTTCTTAGAGGGACTACCT-ACCTCAAGTGG  
GGG-AAGTCGGAGGCAATAACAGGTCTGTGATGCCCTTAGATACCTT-GGGCTGCACGC  
GCGTTACAATGTAGATGAGAAAAAGGT----TTCC-----GACGTCGA-AAG---GC  
GCC-GGTAATCAATTGAATGTCTACGTAATGGGGATTA-ATTTTTGTAATTATCGATTA  
TCAACGAGGAATTCCTTGTAAAGCGTAAATCATTACTTTGCGCTGAATATGTCCTGCCC  
TTGTACACACCGCCCGTCTCCTACCGATCGAACGATTAGGTAATAACTGACGGATTA--  
--GAT-GATTTTC-TGGTGAAC-CCTGG-TTTGGAT-----TCC---CG-C--CCGTTG  
--T-T---C---C---ATTATGCC-

>KP167478.1 *Heterostelium violaceotypum*

TCTAAG-TATAA-CCTTTA-TACGGTGAAA----CTGCAGACGGCTCAAT--ACAA--CA  
---GT---GATAAACTA-AAGAACTTTCGC-GCTTC-----GGCGTCTT-GGATAACCG  
CAGTAAATCGGGGCTAATACATATAAAA-CG-AGAGGATGAGCAGG----CAACTGCG-AG  
TCTTTGCGATTGTT---A-GCTATCTTTT--CACACCAACCTCCTCGGAGTTTGTGGT  
GAATCCGAACAATATGCTGATCGAAA-----ATT-TATTTTCGACGAGTTCCTTTGT  
GTCACTGCCCTATCAACTTTCGATGGTAAGGTATTGGCTTACCATGGTTGTAACGGGTGA  
CGGGGAATCAGGGTTCGATTCCGGAGAGGGAGCCTGAGAAATGGCTACCCTTCTACGGA  
AGGCAGCAGGCGCGCAAATT-ACTCAATCCCAATAC-GGGGAAGTAGTGACAAAAAATAC  
TAATGCCTTTCCATAT-TATGGGGG--GCAATTGGAATAAGTACAACCTAAATCGCTTAG  
CA-AAAGTGATTGGAGGGCAAGTCTGGTGCCAGCAGCCGCGGTAATTCCAGTCCAA-TA  
GCGTATACTAAATTTGTTGCAGTTAAAA-AGC-TCGTAGTTGAGATTGAGATTCTTG-G  
GT-TAAGCCAGTCATAGTAGCTTT--CGGGTATTATGG-T--TCGGTAAAGCTTTTG

AGTGGATTTTA-TTTTTCA-CTTTTAAAGTTA-CCAAGGAATTTCCAACCTGC-CCA--TG  
TAGACTGGCAACAGTTT--AC-AATC--GGGTGATCTACTGTGAGAAAA-TTGTAGTGT  
CAAAGCA--GG-C---GTC---TTACGTTTGTTCATGCAGCATGGTATAGTAAAAATATG  
ACAC---TAAATATAT-GTTGGTTG-TATA---TTCT-TAGTGTAACTACTAATAGGGAA  
GGGCGGGGCCGTTTCATATTGATGGGCGAGAGGTGAAATTCGTTGACCCTATCAAGATGCA  
CTACAGCGAAAGCATTCCGGCAAGTACTTCTCCATTAATCAAGAACGAAAAGTTTGGGGATC  
GAAAGCATCAGATACCGTCTAGTCCAAACCATAAACTATGTGCGACCAGGGATTGGACG  
GATAAT-TTTTTAAAAAAGTCTCGCTCAGAACCTT-GTGAGAAATCAT-GAGTGTGGACTC  
TGGGGGGAGTATGGTGCAGAGTCTGAAACTTAAAGGAATTGACGGAAGGGCACACAATGG  
AGTGGAA-CCTGCGGCTTAATTT-GACTCAACTCGGGAAA-ACTTACCAAGCTCAGATAT  
AATAAGGATTGACAGG-CTAA-AAGATCTTTCATGATTGTATAAGTGGTGGTGCATGGTC  
GTTCTTAG-TTGGTGGAGTGAATTGTCTGGTCAATTCCGATAACGGACGAGACCTTACC  
TGCTAACTAGTGGTATTTATTTGGTCAATATGGAAGATAGTCATT-TGGTGTGGT-GTC  
AGGT--GTCAAA--GCTTG--GC-ATTCTTATTGAG-TGGTGTGATTCTGGTCAGA  
TAG--GTACTAACTAAAAACATA---A--CTTCT-AGAGGGACTACC--ACCTCA-GTGG  
GGGG-AA-TCG-AAGC-ATAACAGG-CTGTGA-GCCCT-AAA-ACCTT-GG-CTGC-CCC  
GCGT-ACAATG-AGATGA-AAAAAGG----TTCC-----GAC-TCGA-A-G---GT  
GCC-G-TA-TCAAT-GGATTG-CTACG-AATGGGGAT-A-ATTTT-G-AA-TATCGAT-A  
TCA-CGAGGA-TTC-TTG-AAGCGTAA-----

>HQ141507.1\_Heterostelium\_stolonicoideum\_K12A

TCTAAG-TATAA-CCTTTA-TACGGTGAAC---CTGCAGAAAGGATCAACTCACGG--CT  
--TGT---GATAAACTA-AAGAACTTCCGC-GCTTC-----GGCGTCTT-GGATAACCG  
CAGTAAATCGGGGCTAATACATATAAA-CG-AGAGGGTGAGCGGG---CAACTGCG-AA  
CCTTTGCGATTGTT---A-GCTATCA-CT--CA--CCAACCTCTTCGGAGTTTGTGGT  
GAATCCGAACAATATTGCTGATCGAAA-----ATT-TATTTTCGACGAGTTCTTTGT  
GTCCTGCCCCTAACAATTTCGATGGTAAGGTATTGGCTTACCATGGTTGTAACGGGTGA  
CGGGGAATCAGGGTTCGATTCCGGAGAGGGAGCCTGAGAAAATGGCTACCCTTCTACGGA  
AGGCAGCAGGCGCGCAAACT-ACTCAATCCCAATAC-GGGGAAGTAGTGACAAAAAATAC  
TAATGCCTTTCCATAT-TATGGGGG--GCAATTGGAATAAGTACAACCTAAATCGCTTAG  
CA-AAAGTGATTGGAGGGCAAGTCTGGTGCCAGCAGCCGCGTAATTCCAGCTCCAA-TA  
GCGTATACTAAATTTGTTGACGTTAAAA-AGC-TCGTAGTTGAGATTGAGATTCTTG-G  
GT-TAAGCCAGTCATAGTAGCTTT--CGGGTATTATGA-T-TTCGGTTAAAGCTTTT  
AGTGGATTTTA-TTTTTCA-CTTTTAAAGTTA-CCAAGGGATTCCAACCTGC-CCA--TG  
TAAGCTGGCAACAGTTT--AC-AATC--GGGTGATCTACTGTGAGAAAA-TTGTAGTGT  
CAAAGCA--GG-C---GTC---TTACGTTTGTTCATGCAGCATGGTATAGTAAAAATATG  
ACAC---TAAATATAT-GTTGGTTG-TATA---TTCT-TAGTGTAACTACTAATAGGGAA  
GGGCGGGGCCGTTTCATATTGATGGGCGAGAGGTGAAATTCGTTGACCCTATCAAGATGCA  
CTACAGCGAAAGCATTTCGGCAAGTACTTCTCCATTAATCAAGAACGAAAAGTTTGGGGATC  
GAAGACGATCAGATACCGTCTGATGCCAAACCATAAACTATGTGCGACCAGGGATTGGACG  
GATAAT-TTTTTAAAAAAGTCTCGCTCAGAACCTT-GTGAGAAATCAT-GAGTGTGGACTC  
TGGGGGGAGTATGGTGCAGAGTCTGAAACTTAAAGGAATTGACGGAAGGGCACACAATGG  
AGTGGAA-CCTGCGGCTTAATTT-GACTCAACTCGGGAAA-ACTTACCAAGCTCAGATAT  
AATAAGGATTGACAGA-CTAA-AAGATCTTTCATGATTGTATAAGTGGTGGTGCATGGTC  
GTTCTTAG-TTGGTGGAGTGAATTTGTCTGGTCAATTCCGATAACGGACGAGACCTTACC  
TGCTAACTAGTGGTATTTATTTGGTCAATATGGAAGATAGTCATT-TGGTGTGGT-GTC  
AGG---GTCAAA--CTTG--GC-ATTCTTATTGAG-TGGTGTGATTCTGGTCAGA  
TAG--GTACTAACTAAAAAATA---AA-CTTCTTAGAGGGACTACCT-ACCTCAAGTGG  
GGGG-AAGTCGAGGCAATAACAGGTCTGTGATGCCCTTAGATACCTT-GGGCTGCACGC  
GCGTTACAATGTAGATGAGAAAAAGGT----TTCC-----GACATCGA-AAG---GT  
GCC-GGTAATCAATTGAATTGTCTACGTAATGGGGATTA-ATTTTGTAAATATCGATTA  
TCAACGCGAAATTCCTTGTAAAGCGTAAATCATTACTTTACGCTGAATATGTCCTGCCCT  
TTGTACACACCGCCGCTCCTACCGATCGAACGATTAGGTAAAAGTACGCGATTA--  
-GAT-GATTTT-CT--AAC-C-TGG---TTGAT-----CCT-GGT-GAACC--TG  
-CA-GAAGGAT--C---A---GCC-

>AM168103.1\_Heterostelium\_pallidum\_TNS\_C\_98

TCTAAG-TATAA-CCTTTA-TACGGTGAAC---CTGCAGACGGCTCATT--ACAA--CA  
---GT---GATAAACTA-AAGAACTTCCGC-GCTTC-----GGCGTCTT-GGATAACCG  
CAGTAAATCGGGGCTAATACATATAAA-CG-AGAGGGTGAGCGGG---CAACTGCG-AA  
CCTTTGCGATTGTT---A-GCTATCTTTT---CA--CCAACCTCTTCGGAGTTTGTGGT  
GAATCCGAACAATATTGCTGATCGAAA-----ATT-TATTTTCGACGAGTTCTTTGT  
GTCCTGCCCCTAACAATTTCGATGGTAAGGTATTGGCTTACCATGGTTGTAACGGGTGA  
CGGGGAATCAGGGTTCGATTCCGGAGAGGGAGCCTGAGAAAATGGCTACCCTTCTACGGA  
AGGCAGCAGGCGCGCAAACT-ACTCAATCCCAATAC-GGGGAAGTAGTGACAAAAAATAC  
TAATGCCTTTCCATAT-TATGGGGG--GCAATTGGAATAAGTACAACCTAAATCGCTTAG  
CA-AAAGTGATTGGAGGGCAAGTCTGGTGCCAGCAGCCGCGTAATTCCAGCTCCAA-TA  
GCGTATACTAAATTTGTTGACGTTAAAA-AGC-TCGTAGTTGAGATTGAGATTCTTG-G  
GT-TAAGCCAGTCATAGTAGCTTT--CGGGTATTATGA-T-TTCGGTTAAAGCTTTT  
AGTGGATTTTA-TTTTTCA-CTTTTAAAGTTA-CCAAGGGATTCCAACCTGC-CCA--TG  
TAAGCTGGCAACAGTTT--AC-AATC--GGGTGATCTACTGTGAGAAAA-TTGTAGTGT  
CAAAGCA--GG-C---GTC---TTACGTTTGTTCATGCAGCATGGTATAGTAAAAATATG

ACAC---TAAATATAT-GTTGGTTG-TATA---TTCT-TAGTGTAATGACTAATAGGGAA  
GGCGGGGCGGTTTCATTTGATGGGCGAGAGGTGAAATTCGTTGACCCTATCAAGATGCA  
CTACAGCGAAAGCATTTCGGCAAGTACTTCTCCATTAATCAAGAACGAAAAGTTTGGGGATC  
GAAGACGATCAGATACCGTCGTAGTCCAAACCATAAACTATGTGACCAGGGATTGGACG  
GATAAT-TTTTTAAAAAATCGCTCAGAACCTT-GTGAGAAATCAT-GAGTGTGGACTC  
TGGGGGGAGTATGGTTCGAACTGAACTTAAAGGAATTGACGGAAGGGCACACAATGG  
AGTGGAA-CCTGCGGCTTAATTT-GACTCAACTCGGGAAA-ACTTACCAAGCTCAGATAT  
AATAAGGATTGACAGA-CTAA-AAGATCTTTCATGATTGTATAAGTGGTGGTGCATGGTC  
GTTCTTAG-TTGGTGGAGTGATTTGTCTGGTCAATTCCGATAACGGACGAGACCTTACC  
TGCTAACTAGTGGTATTTATTTGGTCAATATGGAAGATAGTCATT-TGGTGTGGT-GTC  
AGG---GTCAAA---CTTG---GC-ATTCTTCATTGAG-TGGTGTGATTCTGGTCAGA  
TAG--GTACTAACTAAAAAATA---AA-CTTCTTAGAGGGACTACCT-ACCTCAAGTGG  
GGGG-AAGTCGGAGGCAATAACAGGTCTGTGATGCCCTTAGATACCTT-GGGCTGCACGC  
GCGTTACAATGTAGATGAGAAAAAGGT----TTCC-----GACATCGA-AAG---GT  
GCC-GGTAATCAATTGAATTGCTACGTAATGGGGATTA-ATTTTGTAAATTATCGATTA  
TCAACGAGGAATTCCTTGTAAAGCGTAAATCATTACTTTACGCTGAATATGTCCCTGCCCT  
TTGTACACACCGCCCGTCTCTACCATCGAACGATTAGGTAATAACTGACGGATTA--  
-GAT-GATTTTCT--CT---CGC-A-AGG-GGTTATC-----GTT-TGA-GAAG--TTA  
-GT-TAAATCT--C---ATT--GTTT

>AM168102.1\_Heterostelium\_arachnoideum\_YA1

TCTAAG-TATAA-CCTTTA-TACGGTGAAC---CTGCAGACGGCTCATT--ACAA--CA  
---GT---GATAAACTA-AAGAACTTTCGC-GCTTC-----GGCGTCTT-GGATAACCG  
CAGTAAATCGGGGCTAATACATGTAAA-CG-AGAGGATGAGCGGG---CAACTGCG-AG  
TCTTTGCGATTGTT---A-GCT-TTTATT---CACACCAACCTCTTCGGAGTTTGTGGT  
GAGTCCGAACAATATTGCTGATCGGAA-----ATT-TATTTCCGACGAGTTCTTTGT  
GTCACCTGCCCTATCAACTTTCGATGGTAAGGTATTGGCTTACCATGGTTGTAACGGGTGA  
CGGGGAATCAGGGTTCGATTCGGGAGAGGGAGCCTGAGAAATGGCTACCCTTCTATGGA  
AGGCAGCAGGCGCGCAAATT-ACTCAATCCCAATAC-GGGGAAGTAGTGACAAAAAATAC  
TAATGCCTTTCCATTTATATGGGGG--GCAATTGGAATAAGTACAACCTAAATCGCTTAG  
CA-AAAGTGATTGGAGGGCAAGTCTGGTGCCAGCAGCCGCGGTAATTCCAGCTCAA-TA  
GCGTATACTAAATTTGTTGCAAGTAAAA-AGC-TCGTAGTTGAGATTGAGATTTCTTG-G  
GT-TTAG--CATGGACTATGGCTT-CAC-GGTTTATA--A-T-TT-ATGTCAAGCTTTAT  
AGTAAAGATTTT-ACTCTTA-TTATTTAAGTTA-CCAAGAAATTTCCAACCTGC-CCA--TG  
CCAGTTAGCAATAATTG--GCTGATC--GGGTGATCTACTGTGAGAAAA-TTGTAGTGT  
CAAAGCA--GG-C---GTC---TTTCGCTTGTTCATGCAGCATGGTATAGTAAAAATATG  
ACAC---TAAACATAT-GTTGGTTG-TATG---TA-T-TAGTGAATGACTAATAGGGAA  
GGCGGGGCGGTTTCATTTGATGGGCGAGAGGTGAAATTCGTTGACCCTATCAAGATGCA  
CTACAGCGAAAGCATTTCGGCAAGTACTTCTCCATTAATCAAGAACGAAAAGTTTGGGGATC  
GAAGACGATCAGATACCGTCGTAGTCCAAACCATAAACTATGTGACCAGGGATTGGACG  
GATAAT-TTTTTAAAAAATCGCTCAGAACCTT-GTGAGAAATCAT-GAGTGTGGACTC  
TGGGGGGAGTATGGTTCGCAAGTCTGAACTTAAAGGAATTGACGGAAGGGCACACAATGG  
AGTGGAA-CCTGCGGCTTAATTT-GACTCAACTCGGGAAA-ACTTACCAAGCTCAGATAT  
AATAAGGATTGACAGA-CTAA-AAGATCTTTCATGATTGTATAAGTGGTGGTGCATGGTC  
GTTCTTAG-TTGGTGGAGTGATTTGTCTGGTCAATTCCGATAACGGACGAGACCTTACC  
TGCTAACTAGTGGTATTTATTTGGTCAA-ATGGGAGATAGTCATT-TGGTGTGGCAGTT  
AGGC--CGTTAAAA-GTTTA---ATTGTCCTTCATTGAG-TGGTGTGTATCCTGATCAGA  
TAG--GTACTAACTAAAAAATA---AA-CTTCTTAGAGGGACTACCT-ACCTCAAGTGG  
GGGG-AAGTCGGAGGCAATAACAGGTCTGTGATGCCCTTAGATACCTT-GGGCTGCACGC  
GCGTTACAATGTAGGCGAGAAAAAGGT----TTCC-----GACATCGA-AAG---GT  
GCC-GGTAATCAATTGAATTGCTACGTAATGGGGATTA-ATTTTGTAAATTATCGATTA  
TCAACGAGGAATTCCTTGTAAAGCGTAAATCATTACTTTGCGCTGAATATGTCCCTGCCCT  
TTGTACACACCGCCCGTCTCTACCATCGAACGATTAGGTAATAACTGACAGACTG--  
-GAC-GACTTC--T---CGC-A-AGG-GATTGTT-----GTT-TGG-AAAG--TTA  
-GT-TAAATCT--C---ATT--GTTT

>HQ141508.1\_Heterostelium\_australicum\_NB1AP

TCTAAG-TATAA-CCTTTA-TACGGTGAAC---CTGCAGAAAGGATCAACT-ACGA--CT  
-ATGT---GATAAACTA-AAGAACTTTCGC-GCTTC-----GGCGTCTT-GGATAACCG  
CAGTAAATCGGGGCTAATACATGTAAA-CG-AGAGGATGAGCGGG---CAACTGCG-AG  
TCTTTGCGATTGTT---A-GCT-TTTATT---CACACCAACCTCTTCGGAGTTTGTGGT  
GAGTCCGAACAATATTGCTGATCGGAA-----ATT-TATTTCCGACGAGTTCTTTGT  
GTCACCTGCCCTATCAACTTTCGATGGTAAGGTATTGGCTTACCATGGTTGTAACGGGTGA  
CGGGGAATCAGGGTTCGATTCGGGAGAGGGAGCCTGAGAAATGGCTACCCTTCTATGGA  
AGGCAGCAGGCGCGCAAATT-ACTCAATCCCAATAC-GGGGAAGTAGTGACAAAAAATAC  
TAATGCCTTTCCATTTATATGGGGG--GCAATTGGAATAAGTACAACCTAAATCGCTTAG  
CA-AAAGTGATTGGAGGGCAAGTCTGGTGCCAGCAGCCGCGGTAATTCCAGCTCAA-TA  
GCGTATACTAAATTTGTTGCAAGTAAAA-AGC-TCGTAGTTGAGATTGAGATTTCTTG-G  
GT-TTAG--CATTGATTATGACTTT--CGGGTTTATA--A-T-TT-ATGTCAAGCTTTAT  
AATAAGATTTT-ACTCTTG-TTATTTAAGTTA-CCAAGAAATTTCCAACCTGC-CCA--TG  
CCAGTTAGCAATAATTG--GCTGATC--GGGTGATCTACTGTGAGAAAA-TTGTAGTGT  
CAAAGCA--GG-C---GTC---TTTCGCTTGTTCATGCAGCATGGTATAGTAAAAATATG  
ACAC---TAAACATAT-GTTGGTTG-TATG---TA-T-TAGTGAATGACTAATAGGGAA  
GGCGGGGCGGTTTCATTTGATGGGCGAGAGGTGAAATTCGTTGACCCTATCAAGATGCA  
CTACAGCGAAAGCATTTCGGCAAGTACTTCTCCATTAATCAAGAACGAAAAGTTTGGGGATC



GAAGACGATCAGATACCGCTCGTAGTCCAAACCATAAACTATGTCGACCAGGGATTGGACG  
GATAAT-TTTTTAAAACTCGCTCAGAACCTT-GTGAGAAATCAT-GAGTGTGGACTC  
TGGGGGAGTATGGTCGCAAGTCTGAAACTTAAAGGAATTGACGGAAGGGCACACAATGG  
AGTGGA-CCTGCGGCTTAATTT-GACTCAACTCGGGAAA-ACTTACCAAGCTCAGATAT  
AATAAGGATTGACAGA-CTAA-AAGATCTTTCATGATTGTATAAGTGGTGGTGCATGGTC  
GTTCTTAG-TTGGTGGAGTGTATTGTCTGGTCAATTCCGATAACGGACGAGACCTTACC  
TGCTAACTAGTGGTATTTTATTGGTCAATACGGGAGATAGTCATT-TGGTGTGGCAGTT  
AGAC--CCTTAAAA-GTTTA---ATTGTCCTTCATTGAG-TGGTGTGTATCCTGATCAGA  
TAG--GTACTAACTAAAAA-TA---AA-CTTCTTAGAGGGACTACCT-ACCTCAAGTGG  
GGGG-AAGTCGGAGGCAATAACAGGTCTGTGATGCCCTTAGATACCTT-GGGCTGCACGC  
GCGTTACAATGTAGACGAGAAAAAGGT----TTCC-----GACATCGA-AAG---GT  
GCC-GGTAATCAATTGAATTGTCTACGTAATGGGGATTA-ATTTTTGTAATTATCGATTA  
TCAACGAGGAATTCCTTGTAAAGCGTAAATCATTACTTTGCGCTGAATATGTCCTGCCCT  
TTGTACACACCGCCCGTCTCCTACCGATCGAACGATTAGGTA AAAACTGACAGACTG--  
-GAC-GACTTC--T----AAC-C-TGG---TTGAT-----CCT-GGT-GAACC--TG  
-CA-GAAGGAT--C----A----GCC-

>AM168099.1 *Heterostelium equisetoides*\_B7JB

TCTAAG-TATAA-CCTTTA-TACGGTGA AAA-----CTGCAGACGGCTCATT--ACAA--CA  
---GT---GATAAATA-AAGAACCTTTCGC-GCTTC-----GGCGTCTT-GGATAACCG  
CAGTAAATCGGGGCTAATACATGTAAA-CG-AGAGGATAAGCGGG----CAACTGCG-AG  
TCTTTGCGATTGTT---A-GCT-TTTATT---CACACCAACCTCTTCGGAGTTTGTGGT  
GAGTCCGAACAATATTGCTGATCGGAA-----ACT-TGTTCCGACGAGTCTTTGT  
GTCACTGCCCTATCAACTTTCGATGGTAAGGTATTGGCTTACCATGGTTGTAACGGGTGA  
CGGGGAATCAGGGTTCGATTCCGGAGAGGGAGCCTGAGAAAATGGCTACCACTTCTATGGA  
AGGCAGCAGGCGCGCAAATT-ACTCAATCCCAATAC-GGGGAAGTAGTGACAAAAAATAC  
TAATGCCTTTCCCTTTATAGGGGGG--GCAATTGGAATAAGTACAACCTTAAATCGCTTAA  
CA-AAAGTGATTGGAGGGCAAGTCTGGTGCCAGCAGCCGCGGTAATTCCAGCTCCAA-TA  
GCGTATACTAAAATTTGTTGCAAGTAAAA-AGC-TCGTAGTTGAGATTGAGATTCTTG-G  
GT-TTAG--CGTATTTTATTGCCCTT--CGGGTTTATA--A-T--T-GCGTAAAGCTTTTT  
AATAGGAT-TC-ACTCTTA-TT-TTAAAGTGA-CCAGAAATTTCCAACTGC-CCA--TG  
CCAGTTAGCAATAATTG--GCTGAT--GGGTGATCTACTGTGAGAAAA-TTGTAGTGT  
CAAAGCA--GG-C---GTT---TTAAGCTTGTCAATGCAGCATGGTATAGTAAAAATG  
ACAC---TAAACATAT-GTTGGTAG-TATG---TA-T-TAGTGAATGACTAATAGGGAA  
GGGCGGGGCCGTTCAATTGATGGGCGAGAGGTGAAATTCGTTGACCCTATCAAGATGCA  
CTACAGCGAAAGCATTCGGCAAGTACTTCTCCATTAATCAAGAACGAAAAGTTTGGGGATC  
GAAGACGATCAGATACCGCTAGTCCAAACCATAAACTATGTCGACCAGGGATTGGACG  
GATAAT-TTTTTAAAACTCGCTCAGAACCTT-GTGAGAAATCAT-GAGTGTGGACTC  
TGGGGGAGTATGGTCGCAAGTCTGAAACTTAAAGGAATTGACGGAAGGGCACACAATGG  
AGTGGA-CCTGCGGCTTAATTT-GACTCAACTCGGGAAA-ACTTACCAAGCTCAGATAT  
AATAAGGATTGACAGA-CTAA-AAGATCTTTCATGATTGTATAAGTGGTGGTGCATGGTC  
GTTCTTAG-TTGGTGGAGTATTGTCTGGTCAATCCGATAACGGACGAGACCTTACC  
TGCTAACTAGTGGTATTTTATTGGTCAATACGGGAGATAGTTATT-TGGTGTGGCAGTT  
AGGC--CGTAAAAA-GTTTA---ATTGTCCTTCATTGAG-TAGTGTGTATCCTGATCAGA  
TAG--GTACTAACTAAAAAATA---AA-CTTCTTAGAGGGACTACCT-ACCTCAAGTGG  
GGGG-AAGTCGGAGGCAATAACAGGTCTGTGATGCCCTTAGATACCTT-GGGCTGCACGC  
GCGTTACAATGTAGGCGAGAAAAAGGT----TTCC-----GACATCGA-AAG---GT  
GCC-GGTAATCAATTGAATTGCCTACGTAATGGGGATTA-ATTTTTGTAATTATCGATTA  
TCAACGAGGAATTCCTTGTAAAGCGTAAATCATTACTTTGCGCTGAATATGTCCTGCCCT  
TTGTACACACCGCCCGTCTCCTACCGATCGAACGATTAGGTA AAAACTGACAGACTG--  
-GAT-GACTTC--T----CGC-A-AGG-GATTGTC-----GTT-TGG-AAAG--TTA  
-GT-TAAATCT--C----ATT--GTTT

>HQ141506.1 *Heterostelium multicystogenum*\_AS2

TCTAAG-TATAA-CCTTTA-TACGGTGA AAA-----CTGCAGAAAGGATCAACT-ACAAG-CA  
--TGT---AGATAAATA-AAGAACCTTTCGC-GCTTC-----GGCGTTTT-GGATAACCG  
CAGTAAATCGGGGCTAATACATATAAA-CG-AGAGGATGAGCGGG----CAACTGCG-AG  
TCTTTGCGATTGTT---A-GCT-TTT-T---CA--CCAATCTCTTCGGAGTTTGTGGT  
GAATCCCTACAATATTGCTGATCGGAA-----ACT-TGTTCCGACGAGTCTTTGT  
GTCACTGCCCTATCAACTTTCGATGGTAAGGTATTGGCTTACCATGGTTGTAACGGGTGA  
CGGGGAATCAGGGTTCGATTCCGGAGAGGGAGCCTGAGAAAATGGCTACCACTTCTACGGA  
AGGCAGCAGGCGCGCAAATT-ACTCAATCCCAATAC-GGGGAAGTAGTGACAAAAAATAC  
TAATGCCTTTCCATTTATAGGGGG--GCAATTGGAATAAGTACAACCTTAAATCGCTTAA  
CA-AAAGTGATTGGAGGGCAAGTCTGGTGCCAGCAGCCGCGTAATTCCAGCTCCAA-TA  
GCGTATACTAAAATTTGTTGCAAGTAAAA-AGC-TCGTAGTTGAGATTGAGATTCTTTG-G  
GT-TTAA--CAGTCAGCATTCCTTACCCGGTTAATGCTT-TGATCT-GTAAAGCTTTAT  
AGCAGAAATTT-ATTTT-G-TTATAAAGTGA-CCAAAGAATTTCTATCTGC-CCA--TG  
TAGCCAGCAATGGTGA-TT-AATC--GGGTGATCTACTGTGAGAAAA-TTGTAGTGT  
CAAAGCA--GG-C---GTC---TTACGTTTGTCAATGCAGCATGGTATAGTAAAAATG  
ACAC---TAAACATAT-GTTGGTTG-TATG---TT-T-TAGTGAATGACTAATAGGGAA  
GGGCGGGGCCGTTCAATTGATGGGCGAGAGGTGAAATTCGTTGACCCTATCAAGATGCA  
CTACAGCGAAAGCATTCGGCAAGTACTTCTCCATTAATCAAGAACGAAAAGTTTGGGGATC  
GAAGACGATCAGATACCGTCTGATGCCAAACCATAAACTATGTCGACCAGGGATTGGACG  
GATAAT-TTTTTAAAACTCGCTCAGAACCTT-GTGAGAAATCAT-GAGTGTGGACTC  
TGGGGGAGTATGGTCGCAAGTCTGAAACTTAAAGGAATTGACGGAAGGGCACACAATGG

AGTGGAA-CCTGCGGCTTAATTT-GACTCAACTCGGGAAA-ACTTACCAAGCTCAGATAT  
AATAAGGATTGACAGA-CTAA-AAGATCTTTCATGATTGTATAAGTGGTGGTGCATGGTC  
GTTCTTAG-TTGGTGGAGTGATTTGTCTGGTCAATTCCGATAACGGACGAGACCTCTACT  
TACTAACTAGTGGTATTTATTTGGTCAATACGGGAGATAGTCATT-TGGTGTGGTAGT-  
AGGA--CGTCAAAA-TCTTA----TTATCTTCATTGAG-TGGTGTGTATCCTGATCAGA  
TAG--GTACTAACTTAAAAAATA---AA-CTTCTTAGAAGGACTACCT-ACCTCAAGTGG  
GGGG-AAGTCGGAGGCAATAACAGGTCTGTGATGCCCTTAGATACCTT-GGGCTGCACGG  
GCGTTACAATGTAGGCGAGAAAAAGGT----TTCC-----GGAATCGA-AAG---GT  
TTC-GGTAATCATTGAATTGCCTACGTAATGGGGATTA-ATTTTGTAAATTATCGATTA  
TCAACGAGGAATTCCTTGAAGCGTAAATCATTACTTTACGCTGAATATGTCCCTGCCCT  
TTGTACACACCGCCCTCGCTCCTACCGATCGAACGATTAGGTAAAACTGACGGACTA--  
--GGC-GACTTT-T---AAC-CATGG---TTGAT-----CC--GGT-GAACC--TG  
-CA-GAAGGAT--C---A---TGCC-

>HQ141496.1 *Heterostelium* sp. Laos3

TCTAAG-TATAA-CCTTTA-TACGGTGAAC---CTGCAGAAGGATCATCTCACGAG-CA  
-TAGT---AGATAAACTA-AAGAACCTTTCGC-GCTTC-----GGCGTCTT-GGATAACCG  
CAGTAAATCGGGGCTAATACATGTAAA-CG-AGAGGATGAGCAGG----CAACTGCG-AG  
TCTTTGCGATTGTT---A-GCT-TTCATT---CA--CCAACCTTTCGGAGTTTGTGGT  
GAGTCCGAACAATATGCTGATCGGAA-----ACT-TGTTCCGACGAGTCTTTGT  
GTCACTGCCCTATCAACTTTCGATGGTAAGGTATTGGCTTACCATGGTTGTAACGGGTGA  
CGGGGAATCAGGGTTCGATTCGGAGAGGGAGCCTGAGAAATGGCTACCCTTCTACGGA  
AGGCAGCAGGCGCGCAAATT-ACTCAATCCCAATAC-GGGGAAGTAGTGACAAAAAATAC  
TAATGCCTTTCCATTTATGAGGGG--GCAATTGGAATAAGTACAACCTTAAATCGCTTAG  
CA-AAAGTGATTGGAGGGCAAGTCTGGTGCCAGCAGCCGCGTAATTCCAGCTCCAA-TA  
GCGTATACTAAATTTGTTGCAGTAAAA-AGC-TCGTAGTTGAGATTGAGATTTCTTA-G  
GT-TTAG---AGTCACC-TGGCCTT--CGGGT-CAG-GT-TG-TCTCGTAAAGCTTTAT  
AATGAAATTC-ATTTT-G-TTATTAAAGTCA-CTAAGGAATTTCTATCTGC-CCA--TG  
GTAGCTAGCAATAGTTA--TC-AATC--GGGTGATCTACTGTGAGAAAA-TTGTAGTGT  
CAAAGCA--GG-C---GTC---TTACGTTTGTCAATGCAGCATGGTATAGTAAAAATAG  
ACAC---TAAATATAT-GTTGGTTG-TATA---TTCT-TAGTGTAAATGACTAATAGGGAA  
GGGCGGGCCGTTCAATTTGATGGCGGAGAGGTGAAATTCGTTGACCCTATCAAGATGCA  
CTACAGCGAAAGCATTTCGGCAAGTACTTCTCCATTAATCAAGAACGAAAGTTGGGGATC  
GAAAGCAGATCAGATACCGTCGTAGTCCAAACCATAAACTATGTGACCAGGGATTGGACG  
GATAAT-TTTTTAAAACTCGCTCAGAACCTT-GTGAGAAATCAT-GAGTGTGGACTC  
TGGGGGGAGTATGGTTCGAAAGTCTGAAACTTAAAGGAATTGACGGAAGGGCACACAATGG  
AGTGGAA-CCTGCGGCTTAATTT-GACTCAACTCGGGAAA-ACTTACCAAGCTCAGATAT  
AATAAGGATTGACAGA-CTAA-AAGATCTTTCATGATTGTATAAGTGGTGGTGCATGGTC  
GTTCTTAG-TTGGTGGAGTGATTTGTCTGGTCAATTCCGATAACGGACGAGACCTCTACT  
TACTAACTAGTGGTATTTATTTGGTCAATATGGGAGATAGTCATT-TGGTGTGGTAGT  
AGGC--CGTAAAA-GTTA---GCTATTCTCATTGAG-TGGTGTGATTCTGATCAGA  
TAG--GTACTAAATTTAAAAATA---AA-CTTCTTAGAAGGACTACCT-ACCTCAAGTGG  
GGGG-AAGTCGGAGGCAATAACAGGTCTGTGATGCCCTTAGATACCTT-GGGCTGCACGG  
GCGTTACAATGTAGGCGAGAAAAAGGT----TTCC-----GGAATCGA-AAG---GT  
TTC-GGTAATCATTGAATTGCCTACGTAATGGGGATTA-ATTTTGTAAATTATCGATTA  
TCAACGAGGAATTCCTTGAAGCGTAAATCATTACTT-----

>AM168104.1 *Heterostelium pallidum* PN500

TCTAAG-TATAA-CCTTTA-TACGGTGAAC---CTGCAGACGGCTCATT--ACAA--CA  
---GT---GATAAACTA-AAGAACCTTTCGC-GCTTC-----GGCGTCTT-GGATAACCG  
CAGTAAATCGGGGCTAATACATGTAAA-CG-AGAGGATGAGCAGG----TAACTGCG-AG  
TCTTTGCGATTGTT---A-GCT-TTCATT---CACACCAACCTTTCGGAGTTTGTGGT  
GAGTCCGAACAATATGCTGATCGGAA-----ACT-TGTTCCGACGAGTCTTTGT  
GTCACTGCCCTATCAACTTTCGATGGTAAGGTATTGGCTTACCATGGTTGTAACGGGTGA  
CGGGGAATCAGGGTTCGATTCGGAGAGGGAGCCTGAGAAATGGCTACCCTTCTACGGA  
AGGCAGCAGGCGCGCAAATT-ACTCAATCCCAATAC-GGGGAAGTAGTGACAAAAAATAC  
TAATGCCTTTCCATTTATATGGGG--GCAATTGGAATAAGTACAACCTTAAATCGCTTAG  
CA-AAAGTGATTGGAGGGCAAGTCTGGTGCCAGCAGCCGCGTAATTCCAGCTCCAA-TA  
GCGTATACTAAATTTGTTGCAGTAAAA-AGC-TCGTAGTTGAGATTGAGATTTCTTA-G  
GT-TTAG---AGTC-GCTTGGCCTT--CGGGTTTGGAG-TT-TGAT-TCGTAAGGCTCTAT  
AGTAGAATTC-ATTTT-A-TTATTAGGGTTA-CTAAGAAATTTCTATCTGC-CCA--TG  
GTAGCTAGCAATAGTTA--TC-AATC--GGGTGATCTACTGTGAGAAAA-TTGTAGTGT  
CAAAGCA--GG-C---GTC---TTACGTTTGTCAATGCAGCATGGTATAGTAAAAATAG  
ACAC---TAAATATAT-GTTGGTTG-TATA---TTCT-TAGTGTAAATGACTAATAGGGAA  
GGGCGGGCCGTTCAATTTGATGGCGGAGAGGTGAAATTCGTAGACCCTTCAAGATGCA  
CTACAGCGAAAGCATTTCGGCAAGTACTTCTCCATTAATCAAGAACGAAAGTTGGGGATC  
AAAGCAGATCAGATACCGTCGTAGTCCAAACCATAAACTATGTGACCAGGGATTGGACG  
GATAAT-TTTTTAAAACTCGCTCAGAACCTT-GTGAGAAATCAT-GAGTGTGGACTC  
TGGGGGGAGTATGGTTCGAAAGTCTGAAACTTAAAGGAATTGACGGAAGGGCACACAATGG  
AGTGGAA-CCTGCGGCTTAATTT-GACTCAACTCGGGAAA-ACTTACCAAGCTCAGATAT  
AATAAGGATTGACAGA-CTAA-AGGATCTTTCATGATTGTATAAGTGGTGGTGCATGGTC  
GTTCTTAG-TTGGTGGAGTGATTTGTCTGGTCAATTCCGATAACGGACGAGACCTCTACT

TACTAACTAGTGGTATTTATTTGGTCACTATGGGAGATAGTCATT-TGGTGTGGTAGTT  
AGGC--CGTTAAAA-GTTTA---GCTATTCTTCATTGAG-TGGTGTGATTCTGATCAGA  
TAG--GTACTAATTTAAAAAATA---AA-CTTCTTAGAAGGACTACCT-ACCTCAAGTGG  
GGGG-AAGTCGGAGGCAATAACAGGTCTGTGATGCCCTTAGATACCTT-GGGCTGCACGG  
GCGTTACAATGTAGGCGAGAAAAAGGT----TTCC-----GGAATCGA-AAG---GT  
TTC-GGTAATCATTGTAATGCTACGTACGTAATGGGGATTA-ATTTTTGTAATTATCGATTA  
TCAACGAGGAATTCCTTGTAAAGCGTAAATCATTACTTTACGCTGAATATGTCCTGCCCT  
TTGTACACACCGCCCGTCTCTACCGATCGAACGATTAGGTAAAACCTGACGGACTG--  
-GAT-GACTTT--TT---CGC-A-AGG-ATTTGTC-----GTT-TGG-GAAG--TTA  
-GT-TAAATCT--C----ATT--GTTT

>EU004605.1\_Heterostelium pallidum PPHU8 ATCC 44421

TCTAAG-TATAA-CCTTTA-TACGGTGAAA---CTGCAGACGGCTCATT--ACAA--CA  
---GT---GATAAACTA-AAGAACTTTCGC-GCTTC-----GGCGTCTT-GGATAACCG  
CAGTAAATCGGGGCTAATACATGTAAA-CG-AGAGGATGAGCAGG---TAACTGCG-AG  
TCTTTGCGATTGTT---A-GCT-TTCATT---CACACCAACCTCTCGGAGTTTGTGGT  
GAGTCCGAACAATATTGCTGATCGGAA-----ACT-TGTTCCGACGAGTCTTTGT  
GTCCTGCCCCTATCAACTTTCGATGGTAAGGTATTGGCTTACCATGGTTGTAACGGGTGA  
CGGGGAATCAGGGTTCGATTCCGGAGAGGGAGCCTGAGAAATGGCTACCACTTCTACGGA  
AGGCAGCAGGCGCGCAAAAT-ACTCAATCCCAATAC-GGGGAAGTAGTGACAAAAAATAC  
TAATGCCTTTCCATTTATATGGGGG--GCAATTGGAATAAGTACAACCTAAATCGCTTAG  
CA-AAAGTGATTGGAGGGCAAGTCTGGTGCCAGCAGCCGCGTAATTCCAGCTCCAA-TA  
GCGTATACTAAATTTGTTGCGATTAAAA-AGC-TCGTAGTTGAGATTGAGATTCTTA-G  
GT-TTAG---AGTC-GCTTGGCCTT--CGGGTTTGGAG-TT-TGAT-TCGTAAGCTCTAT  
AGTAGAATTTCC-ATTTT-A-TTATTAGGTTA-CTAAGAAAATTTCTATCTGC-CA--TG  
GTAGCTAGCAATAGTTA--TC-AATC--GGGTGATCTACTGTGAGAAAA-TTGTAGTGTT  
CAAAGCA--GG-C---GTC---TTACGTTTGTCAATGCAGCATGGTATAGTAAAAATATG  
ACAC---TAAATATAT-GTTGGTTG-TATA---TTCT-TAGTGTAAATGACTAATAGGGAA  
GGGCGGGGCCGTTCAATTTGATGGGCGAGAGGTGAAATTCGTTGACCCTATCAAGATGCA  
CTACAGCGAAAGCATTTCGGCAAGTACTTCTCCATTAATCAAGAACGAAAAGTTTGGGGATC  
GAAGACGATCAGATACCGTCTAGTCCAAACCATAAACTATGTGACACAGGGATTGGACG  
GATAAT-TTTTTAAAAAATCGCTCAGAACCTT-GTGAGAAATCAT-GAGTGTGGACTC  
TGGGGGAGTATGGTCGCAAGTCTGAAACTTAAAGGAATTGACGGAAGGGCACACAATGG  
AGTGGA-CCTGCGGCTTAATTT-GACTCAACTCGGGAAA-ACTTACCAAGCTCAGATAT  
AATAAGGATTGACAGA-CTAA-AAGATCTTTCATGATTGTATAAGTGGTGGTGCATGGTC  
GTTCTTAG-TTGGTGGAGTGATTGTCTGGTCAATTCCGATAACGGACGAGACCTCTACT  
TACTAACTAGTGGTATTTATTTGGTCACTATGGGAGATAGTCATT-TGGTGTGGTAGTT  
AGGC--CGTTAAAA-GTTTA---GCTATTCTTCATTGAG-TGGTGTGATTCTGATCAGA  
TAG--GTACTAATTTAAAAAATA---AA-CTTCTTAGAAGGACTACCT-ACCTCAAGTGG  
GGGG-AAGTCGGAGGCAATAACAGGTCTGTGATGCCCTTAGATACCTT-GGGCTGCACGG  
GCGTTACAATGTAGGCGAGAAAAAGGT----TTCC-----GGAATCGA-AAG---GT  
TTC-GGTAATCATTGTAATGCTACGTAATGGGGATTA-ATTTTTGTAATTATCGATTA  
TCAACGAGGAATTCCTTGTAAAGCGTAAATCATTACTTTACGCTGAATATGTCCTGCCCT  
TTGTACACACCGCCCGTCTCTACCGATCGAACGATTAGGTAAAACCTGACGGACTG--  
-GAT-GACTTT--TT---CGC-A-AGG-ATTTGTC-----GTT-TGG-GAAG--TTA  
-GT-TAAATCT--C----ATT--GTTT

>AM168105.1\_Heterostelium tenuissimum TNS\_C\_97

TCTAAG-TATAA-CCTTTA-TACGGTGAAA---CTGCAGACGGCTCATT--ACAA--CA  
---GT---GATAAACTA-AAGAACTTTCGC-GCTTC-----GGCGTCTT-GGATAACCG  
CAGTAAATCGGGGCTAATACATGTAAA-CG-AGAGGATGAGCAGG---CAACTGCG-AG  
TCTTTGCGATTGTT---A-GCT-TTCTT---CA--CCAACCTCTTCGGAGTTTGTGGT  
GAGTCCGAACAATATTGCTGATCGGAA-----ACT-TGTTCCGACGAGTCTTTGT  
GTCCTGCCCCTATCAACTTTCGATGGTAAGGTATTGGCTTACCATGGTTGTAACGGGTGA  
CGGGGAATCAGGGTTCGATTCCGGAGAGGGAGCCTGAGAAATGGCTACCACTTCTACGGA  
AGGCAGCAGGCGCGCAAAAT-ACTCAATCCCAATAC-GGGGAAGTAGTGACAAAAAATAC  
TAATGCCTTTCCATTTATATGGGGG--GCAATTGGAATAAGTATAACTTAAATCGCTTAG  
CA-AAAGTGATTGGAGGGCAAGTCTGGTGCCAGCAGCCGCGTAATTCCAGCTCCAA-TA  
GCGTATACTAAATTTGTTGCGATTAAAA-AGC-TCGTAGTTGAGATTGAGATTT-TTA-G  
G--TTAG---GGTCGGCATTGCCTT--CGGGTTAGTGCTT-TGAT-TCGTAAGCTTGT  
AGTAGAATTTTTATTTT-A-TTATTAAGTTA-CTAAGGAATTTCCAACCTGC-CAA-TT  
GTAATTAGCAATAATTA---C-ATTTA-GGGTGTACTACTGTGAGAAAA-TTGTAGTGTT  
CAAAGCA--GG-C---GTC---TTACGTTTGTCAATGCAGCATGGTATAGTAAAAATATG  
ACAC---TAAATATAT-GTTGGTTG-TATA---TTCT-TAGTGTAAATGACTAATAGGGAA  
GGGCGGGGCCGTTCAATTTGATGGGCGAGAGGTGAAATTCGTTGACCCTATCAAGATGCA  
CTACAGCGAAAGCATTTCGGCAAGTACTTCTCCATTAATCAAGAACGAAAAGTTTGGGGATC  
GAAGACGATCAGATACCTCTAGTCCAAACCATAAACTATGTGACACAGGGATTGGACG  
GATAAT-TTTTTAAAAAATCGCTCAGAACCTT-GTGAGAAATCAT-GAGTGTGGACTC  
TGGGGGAGTATGGTCGCAAGTCTGAAACTTAAAGGAATTGACGGAAGGGCACACAATGG  
AGTGGA-CCTGCGGCTTAATTT-GACTCAACTCGGGAAA-ACTTACCAAGCTCAGATAT  
AATAAGGATTGACAGA-CTAA-AAGATCTTTCATGATTGTATAAGTGGTGGTGCATGGTC  
GTTCTTAG-TTGGTGGAGTGATTGTCTGGTCAATTCCGATAACGGACGAGACCTCTACT  
TACTAACTAGTGGTATTTATTTGGTCAATATGGGAGATAGTCATT-TGGTGTGGTAGTT  
AGAC--CGTTAAAA-GTTTA---GCTATTCTTCATTGAG-TGGTGTGATTCTGATCAGA  
TAG--GTACTAATTTAAAAAATA---AA-CTTCTTAGAAGGACTACCT-ACCTCAAGTGG

GGGG-AAGTCGGAGGCAATAACAGGTCTGTGATGCCCTTAGATACCTT-GGGCTGCACGG  
CGGTTACAATGTAGGCGAGAAAAAGGT---TTCC-----GGAATCGA-AAG---GT  
TTC-GGTAATCATTGAATTGCCACGTAATGGGGATTA-ATTTTTGTAATTATCGATTA  
TCAACGAGGAATTCCTTGTAAAGCGTAAATCATTACTTTACGCTGAATATGTCCTGCCCT  
TTGTACACACCGCCCGTGCCTACCGATCGAACGATTAGGTA AAAACTGACGGACTA--  
--GGC-GACTTT--TC--CGC-A-AGG-ATTTGTT-----GTT-TGG-GAAG--TTA  
-GT-TAAATCT--C----ATT--GTTT

>AY040339.1 *Heterostelium tenuissimum*

TCTAAG-TATAA-CCTTTA-TACGGTGAAA---CTGCAGACGGCTCATT--ACAA--CA  
---GT---GATAAACTA-AAGAACTTTCGC-GCTTC-----GGCGTCTT-GGATAACCG  
CAGTAAATCGGGGCTAATACATGTAAA-CG-AAAGGATGAGCAGG----CAACTGCG-AG  
TCTTTGCGATTGTT---A-GCT-TTTCTT---CA--CCAACCTCTTCGGAGTTTGTGGT  
GAATCCGAACAATATTGCTGATCGGAA-----ACT-TGTTCCGACGAGTCTTTGT  
GTCACTGCCCTATCAACTTTCGATGGTAAGGTATTGGCTTACCATGGTTGTAACGGGTGA  
CGGGGAATCAGGGTTCGATTCCGGAGAGGGAGCCTGAGAAAATGGCTACCACTTCTACGGA  
AGGCAGCAGGCGCGCAAATT-ACTCAATCCCAATAC-GGGGAAGTAGTGACAAAAAATAC  
TAATGCCTTTCCATTTATATGGGGG--GCAATTGGAATAAGTACAACCTAAATCGCTTAG  
CA-AAAGTGATTGGAGGGCAAGTCTGGTGCCAGCAGCCGCGG-AATTCCAGCTCCAA-TA  
GCGTATACTAAATTTGTTCAGTTAAAA-AGC-TCGTAGTTGAGACAGAGATTTCTTA-G  
GT-TTAG---GGTCGGCATTGCCCTT--CGGGTAGTGCTT-TGAT-TCGTAAGCTTTGT  
AGTAGAATTTT-ATTTT-A-TTATTAAGTTA-CTAAGGAATTTCCAACCTGC-CCA--TG  
GTAGCTAGCAATAGTTA--TC-AATC--GGGTGATCTACTGTGAGAAAA-TTGTAGTGTT  
CAAAGCA--GG-CC--GTC---TTACGTTTGTCAATGCAGCATGGTATAGTAAAAATAG  
ACAC---TAAATATAT-GTTGGTTG-TATA---TTCT-TAGTGTAATGACTAATAGGGAA  
GGGCGGGGCCGTTTATATTGATGGGCGAGAGGTGAAATTCGTTGACCCTATCAAGATGCA  
CTACAGCGAAAGCATTTCGGCAAGTACTTCTCCATTAATCAAGAACGAAAAGTTTGGGGATC  
GAAGCAGATCAGATACCGCTGATGCCAAACCATAAACTATGTGACCAAGGATTGGACG  
GATAAT-TTTTTAAAAACTCGCTCAGAACCTT-GTGAGAAATCAT-GAGTGTGGACTC  
TGGGGGGAGTATGGTCGCAAGTCTGAAACTTAAAGGAATTGACGGAAGGGCACACAATGG  
AGTGGAA-CCTGCGGCTTAATTT-GACTCAACTCGGGAAA-ACTTACCAAGCTCAGATAT  
AATAAGGATTGACAGA-CTAA-AAGATCTTTCATGATTGTATAAGTGGTGGTGCATGGTC  
GTTCTTAG-TTGGTGAAGTGATTGTCTGGTCAATTCCGATAACGGACGAGACCTTACT  
TACTAACTAGTGGTATTTATTTGGTCAATATGGGAGATAGTCATT-TGGTGTGGTAGTT  
AGAC--CGTAAAAA-GTTTA---GCTATTCTCATTGAG-TGGTGTGATTCTGATCAGA  
TAG--GTACTAACTTAAAAAATA---AA-CTTCTTAGAAGGACTACCT-AC-TCAAGTGG  
GGGG-AAGTCGGAGGCAATAACAGGTCTGTGATGCCCTTAGATACCTT-GGGCTGCACGG  
CGGTTACAATGTAGGCGAGAAAAAGGT---TTCC-----GGAATCGA-AAG---GT  
TTC-GGTAATCATTGAATTGCCACGTAATGGGGATTA-ATTTTTGTAATTATCGATTA  
TCAACGAGGAATTCCTTGTAAAGCGTAAATCATTACTTTACGCTGAATATGTCCTGCCCT  
TTGTACACACCGCCCGTGCCTACCGATCGAACGATTAGGTA AAAACTGACGGACTA--  
--GAT-GATTTT--CT---CGC-A-AGG-GGTTATT-----GTT-TGA-GAAG--TTA  
-GT-TAAATCT--C----ATT--GTTT

>MN338954.1 *Heterostelium versatile* Mad52

TCTAAG-TATAA-CCTTTA-TACGGTGAAA---CTGCAGACGGCTCATT--ACAA--CA  
---GT---GATAAACTA-TAGAACTTTCGC-GCTTC-----GGCGTCTT-GGATAACCG  
CAGTAAATCGGGGCTAATACATGTAAA-CG-AAAGGATGAGCAGG---CAACTGCG-AA  
TCTTTGCGATTGTT---A-GCT-TTCA----CACACCAACCTCTTCGGAGTTTGTGGT  
GAGTCCGAACAATATTGCTGATCGGAA-----ACT-TGTTCCGACAAGTCTTTGT  
GTCAGTCCCTATCAACTTTCGATGGTAAGGTATTGGCTTACCATGGTTGTAACGGGTGA  
CGGGGAATCAGGGTTCGATTCCGGAGAGGGAGCCTGAGAAAATGGCTACCACTTCTACGGA  
AGGCAGCAGGCGCGCAAATT-ACTCAATCCCAATAC-GGGGAAGTAGTGACAAAAAATAC  
TAATGCCTTTCCATTTATATGGGGG--GCAATTGGAATAAGTACAACCTAAATCGCTTAG  
CA-AAAGTGATTGGAGGGCAAGTCTGGTGCCAGCAGCCGCGGTAATTCCAGCTCCAA-TA  
GCGTATACTAAATTTGTTCAGTTAAAA-AGC-TCGTAGTTAGACTGAGATTTCTTA-G  
GT-TTAG--CGGTCTGCATTGCTTAAATCGGTTAATGTTT--GAT-TCGTAAGCTTTAT  
AGTAGAATTTT-ATTTT-A-TTATTAAGTTA-CTAAGGAATTTCCAACCTGC-CCA--TG  
GTAGCCAGCAATGGTTA--TC-AATC--GGGCGATCCACTGTGAGAAAA-TTGTAGTGTT  
CAAAGCA--GA-C---GTC---TT-CGTTTGTCAATGCAGCATGGTATGGTAAAAATAG  
ACAC---TAAATGTAT-GTTGGTTG-TATA---TA-T-TAGTGTAATGACTAATAGGGAA  
GGGCGGGGCCGTTTATATTGATGGGCGAGAGGTGAAATTCGTTGACCCTATCAAGATACA  
CAACAGCGAAAGCATTTCGGCAAGTACTTCTCCATTAATCAAGAACGAAAAGTTTGGGGATC  
GAAGCAGATCAGATACCGCTCGTAGTCCAAACCATAAACTATGTGACCAAGGATTGGACG  
GATAAT-TTTTTAAAAACTCGCTCAGAACCTT-GTGAGAAATCAT-GAGTGTGGACTC  
TGGGGGGAGTATGGTCGCAAGTCTGAAACTTAAAGGAATTGACGGAAGGGCACACAATGG  
AGTGGAAACCTGCGGCTTTAATT-----

-----  
-----  
-----  
-----  
-----  
-----  
-----  
-----

>HQ141500.1\_Heterostelium\_flexuosum\_AU4B

TCTAAG-TATAA-CCTTTA-TACGGTGAAC----CTGCAGAAGGATCAACT-ACAA--CT  
-ATGT----GATAAACTA-TAGAACTTTCGC-GCTTC----GGCGTCTT-GGATAACCG  
CAGTAAATCGGGGCTAATACATGTAAA-CG-AAAGGATGAGCGGG----CAACTGCG-AG  
TCTTTGCGATTGTT----A-GCT-TTCA----CACACCAACCTCTTCGGAGTTTGTGGT  
GAGTCCGAACAATATTGCTGATCGGAA-----ACT-TGTTTCCGACAAGTCTTTGT  
GTCACTGCCCTATCAACTTTCGATGGTAAGGTATTGGCTTACCATGGTTGTAACGGGTGA  
CGGGGAATCAGGGTTCGATTCCGGAGAGGGAGCCTGAGAAATGGCTACCCTTCTACGGA  
AGGCAGCAGGCGCGCAAATT-ACTCAATCCCAATAC-GGGGAAGTAGTGACAAAAATAC  
TAATGCCTTTCCATTTATATGGGGG--GCAATTGGAATAAGTACAACCTAAATCGCTTAG  
CA-AAAGTGATTGGAGGGCAAGTCTGGTGCCAGCAGCCGCGGTAATTCCAGCTCCAA-TA  
GCGTATACTAAATTTGTTGCAAGTAAAA-AGC-TCGTAGTTTACTGAGATTCTTA-G  
GT-TTAG--CGGTCCGCATTGCCTTAACCGGTTAATGTTT-TGAT-TCGTAAGCTTTAT  
AGTAGAATTTT-ATTTT-A-TTATTAAGTTA-CTAAGGAGTTTCCAACCTGC-CCA--TG  
GTAGCTAGCAATAGTTA--TC-AATC--GGGTGATCCACTGTGAGAAAA-TTGTAGTGT  
CAAAGCA--GA-C---GTC---TT-CGTTTGTCAATGCAGCATGGTATGGTAAAAATATG  
ACAC---TAAATGTAT-GTTGGTTG-TATA---TA-T-TAGTGAATGACTAATAGGGAA  
GGGCGGGGCCGTTTATATTGATGGGCGAGAGGTGAAATTCGTTGACCCTATCAAGATACA  
CAACAGCGAAAGCATTCCGGCAAGTACTTCTCCATTAATCAAGAACGAAAGTTTGGGGATC  
GAAGACGATCAGATACCGTCTGATGCCAAACCATAAACTATGTCGACCAGGGATTGGACG  
GATAAT-TTTTTAAAAAAGTCTCGCTCAGAACCTT-GTGAGAAATCAT-GAGTGTGGACTC  
TGGGGGGAGTATGGTTCGCAAGTCTGAAACTTAAAGGAATTGACGGAAGGGCACACAATGG  
AGTGGAA-CCTGCGGCTTAATTT-GACTCAACTCGGGAAA-ACTTACCAAGCTCAGATAT  
AATAAGGATTGACAGA-CTAA-AAGATCTTTCATGATTGTATAAGTGGTGGTGCATGGTC  
GTTCTTAG-TTGGTGGAGTGATTTGTCTGGTCAATTCCGATAACGGACGAGACCTCTACT  
TACTAAGTAGTGGTATTTATTTGGTCAATATGGGAGATAGTCATT-TGGTGTGGTAGT-  
AGGC--CGTCAAAA-GTTT----GCTATTCTTCATTGAG-TGGTGTGATTCTGATCAGA  
TAG--GTACTAACAAAAAATA---AA-CTTCTTAGAAGGACTACCT-ACCTCAAGTGG  
GGGG-AAGTCGGAGGCAATAACAGGTCTGTGATGCCCTTAGATACCTT-GGGCTGCACGC  
GCGTTACAATGTAGGCGAGAAAAAGGT----TTCC-----GGAATCGA-AAG---GT  
TTC-GGTAATCATTGAATTGCCTACGTAATGGGGATTA-ATTTTGTAAATTATCGATTA  
TCAACGAGGAATTCCTGTAAAGCTAAATCATTACTTTACGCTGAATATGTCCTGCCCT  
TTGTACACACCGCCCGTCTCTACCGATCGAACGATTAGGTAAAACTGACGGACTA--  
--GGC-GATTTT--TT--AAC-CATGG---TTGAT-----CCT-GGT-GAACC--TG  
-CA-GAAGGAT--C---A----GCC-

>HQ141501.1\_Heterostelium\_rotatum\_QC2C

TCTAAG-TATAA-CCTTTA-TACGGTGAAC----CTGCAGAAGGATCAACT-ACAA--CA  
-TGT----GATAAACTA-TAGAACTTTCGC-GCTTC----GGCGTCTT-GGATAACCG  
CAGTAAATCGGGGCTAATACATGTAAA-CG-AAAGGATGAGCGGG----CAACTGCG-AG  
TCTTTGCGATTGTT----A-GCT-TTCA----CACACCAACCTCTTCGGAGTTTGTGGT  
GAGTCCGAACAATATTGCTGATCGGAA-----ACT-TGTTTCCGACAAGTCTTTGT  
GTCACTGCCCTATCAACTTTCGATGGTAAGGTATTGGCTTACCATGGTTGTAACGGGTGA  
CGGGGAATCAGGGTTCGATTCCGGAGAGGGAGCCTGAGAAATGGCTACCCTTCTACGGA  
AGGCAGCAGGCGCGCAAATT-ACTCAATCCCAATAC-GGGGAAGTAGTGACAAAAATAC  
TAATGCCTTTCCATTTATATGGGGG--GCAATTGGAATAAGTACAACCTAAATCGCTTAG  
CA-AAAGTGATTGGAGGGCAAGTCTGGTGCCAGCAGCCGCGGTAATTCCAGCTCCAA-TA  
GCGTATACTAAATTTGTTGCAAGTAAAA-AGC-TCGTAGTTTACTGAGATTCTTA-G  
GT-TTAG--CGGTCCGCATTGCCTTAACCGGTTAATGTTT-TGAT-TCGTAAGCTTTAT  
AGTAGAATTTT-ATTTT-A-TTATTAAGTTA-CTAAGGAGTTTCCAACCTGC-CCA--TG  
GTAGCTAGCAATAGTTA--TC-AATC--GGGTGATCCACTGTGAGAAAA-TTGTAGTGT  
CAAAGCA--GA-C---GTC---TT-CGTTTGTCAATGCAGCATGGTATGGTAAAAATATG  
ACAC---TAAATGTAT-GTTGGTTG-TATA---TA-T-TAGTGAATGACTAATAGGGAA  
GGGCGGGGCCGTTTATATTGATGGGCGAGAGGTGAAATTCGTTGACCCTATCAAGATACA  
CAACAGCGAAAGCATTCCGGCAAGTACTTCTCCATTAATCAAGAACGAAAGTTTGGGGATC  
GAAGACGATCAGATACCGTCTGATGCCAAACCATAAACTATGTCGACCAGGGATTGGACG  
GATAAT-TTTTTAAAAAAGTCTCGCTCAGAACCTT-GTGAGAAATCAT-GAGTGTGGACTC  
TGGGGGGAGTATGGTTCGCAAGTCTGAAACTTAAAGGAATTGACGGAAGGGCACACAATGG  
AGTGGAA-CCTGCGGCTTAATTT-GACTCAACTCGGGAAA-ACTTACCAAGCTCAGATAT  
AATAAGGATTGACAGA-CTAA-AAGATCTTTCATGATTGTATAAGTGGTGGTGCATGGTC  
GTTCTTAG-TTGGTGGAGTGATTTGTCTGGTCAATTCCGATAACGGACGAGACCTCTACT  
TACTAAGTAGTGGTATTTATTTGGTCAATATGGGAGATAGTCATT-TGGTGTGGTAGT-  
AGGC--CGTCAAAA-GTTT----ACTATTCTTCATTGAG-TGGTGTGATTCTGATCAGA  
TAG--GTACTAACAAAAAATA---AA-CTTCTTAGAAGGACTACCT-ACCTCAAGTGG  
GGGG-AAGTCGGAGGCAATAACAGGTCTGTGATGCCCTTAGATACCTT-GGGCTGCACGC  
GCGTTACAATGTAGGCGAGAAAAAGGT----TTCC-----GGAATCGA-AAG---GT  
TTC-GGTAATCATTGAATTGCCTACGTAATGGGGATTA-ATTTTGTAAATTATCGATTA  
TCAACGAGGAATTCCTGTAAAGCTAAATCATTACTTTACGCTGAATATGTCCTGCCCT  
TTGTACACACCGCCCGTCTCTACCGATCGAACGATTAGGTAAAACTGACGGACTA--  
--GGC-GATTTT--TT--AAGC-CATGG---TTGAT-----CCT-GGT-GAACC--TG

-CA-GAAGGAT--C---A---GCC-

>AM168074.1\_Heterostelium\_gloeosporum\_TCK52

TCTAAG-TATAA-CCTTTA-TACGGTGAAA----CTGCAGACGGCTCATT--ACAA--CA  
--GT---GATAAACTA-TAGAACTTTCGC-GCTTC-----GGCGTCTT-GGATAACCG  
CAGTAAATCGGGGCTAATACATGTAAA-CG-AAAGGATGAGCGGG----CAACTGCG-AG  
TCTTTGCGATTGTT---A-GCT-TTCA----CACACCAACCTCTTCGGAGTTTGTGGT  
GAGTCCGAACAATATTGCTGATCGGAA-----ACT-TGTTCCGACAAGTCTTTTGT  
GTCCTGCCCTATCAACTTTCGATGGTAAGGTATTGGCTTACCATGGTTGTAACGGGTGA  
CGGGGAATCAGGGTTCGATTCCGGAGAGGGAGCCTGAGAAATGGCTACCCTTCTACGGA  
AGGCAGCAGGCGCGCAAAAT-GCTCAATCCCAATAC-GGGGAAGTAGTGACAAAAAATAC  
TAATGCCTTTCCATTTATATGGGGG--GCAATTGGAATAAGTACAACCTAAAATCGCTTAG  
CA-AAAGTGATTGGAGGGCAAGTCTGGTGCCAGCAGCCGCGGTAATTCCAGCTCCAA-TA  
GCGTATACTAAATTTGTTCAGTTAAAA-AGC-TCGTAGTTTAGATTGAGATTCTTA-G  
GT-TTAG--CGGTCCGTTATTCGCTTAACCGGTTAACTT-TGAT-TCGTAAGCTTTTAT  
AGTAGAATTTT-C-ATTTT-A-TTATTAAGTTA-CTAAGGAGTTTCCAACCTGC-CCA--TG  
GTAGCTAGCAATAGTTA--TC-AATC--GGGTGATCCACTGTGAGAAAA-TTGTAGTGTT  
CAAAGCA--GA-C---GTC--TT-CGTTTGTCAATGCAGCATGGTATGGTAAAAATATG  
ACAC---TAAATGTAT-GTTGGTTG-TATA---TA-T-TAGTGAATGACTAATAGGGAA  
GGGCGGGCCGTTTATATTGATGGGCGAGAGGTGAAATTCGTTGACCCTATCAAGATACA  
CAACAGCGAAAGCATTTCGGCAAGTACTTCTCCATTAATCAAGAACGAAAGTTTGGGGATC  
GAAGACGATCAGATACCGTCTGATGCCAAACCATAAACTATGTGACACAGGGATTGGACG  
GATAAT-TTTTTAAAAACTCGCTCAGAACCTT-GTGAGAAATCAT-GAGTGTGGACTC  
TGGGGGAGTATGGTTCGAACTGAACTTAAAGGAATTGACGGAAGGGCACACAATGG  
AGTGGAA-CCTGCGGCTTAATTT-GACTCAACTCGGGAAA-ACTTACCAAGCTCAGATAT  
AATAAGGATTGACAGA-CTAA-AAGATCTTTCATGATTGTATAAGTGGTGGTGCATGGTC  
GTTCTTAG-TTGGTGGAGTATTGTCTGGTCAATTCCGATAACGGACGAGACCTCTACT  
TACTAACTAGTGGTATTTTGGTCAATATGGGAGATAGTCATT-TGGTGTGGTAGT-  
AGGC--CGTTAAAA-GTTT---GCTATTCTTCATTGAG-TGGTGTGTATTCTGATCAGA  
TAG--GTACTAACAAAAAATA---AA-CTTCTTAGAAGGACTACCT-ACCTCAAGTGG  
GGGG-AAGTCGGAGGCAATAACAGGTCTGTGATGCCCTTAGATACCTT-GGGCTGCACGC  
GCGTTACAATGTAGGCGAGAAAAAGGT---TTCC-----GGAATCGA-AAG---GT  
TTC-GGTAATCATTTGAATTGCCTACGTAATGGGGATTA-ATTTTTGTAATTATCGATTA  
TCAACGAGGAATTCCTTGTAAAGCGTAAATCATTACTTTACGCTGAATATGTCCCTGCCCT  
TTGTACACACCGCCCGTCTCTACCGATCGAACGATTAGGTAATAACTGACGGACTA--  
--AAC-GATTTT--TT--GGC--AACA-AATTTTT-----GTT-TGG-GAAG--TTA  
-GT-TAAATCT--C---ATT-GTTT

>HQ141502.1\_Heterostelium\_granulosum\_MF5A

TCTAAG-TATAA-CCTTTA-TACGGTGAAC----CTGCAGAAAGGATCAACT-ACAA--CA  
--TGT---GATAAACTA-TAGAACTTTCGC-GCTTC-----GGCGTCTT-GGATAACCG  
CAGTAAATCGGGGCTAATACATGTAAA-CG-AAAGGATGAGCGGG----TAACTGCG-AG  
TCTTTGCGATTGTT---A-GCT-TTCA----CACACCAACCTCTTCGGAGTTTGTGGT  
GAGTCCGAACAATATTGCTGATCGGAA-----ATT-TATTTCCGACAAGTCTTTTGT  
GTCCTGCCCTATCAACTTTCGATGGTAAGGTATTGGCTTACCATGGTTGTAACGGGTGA  
CGGGGAATCAGGGTTCGATTCCGGAGAGGGAGCCTGAGAAATGGCTACCCTTCTACGGA  
AGGCAGCAGGCGCGCAAAAT-ACTCAATCCCAATAC-GGGGAAGTAGTGACAAAAAATAC  
TAATGCCTTTCCATTTATATGGGGG--GCAATTGGAATAAGTACAACCTAAAATCGCTTAG  
CA-AAAGTGATTGGAGGGCAAGTCTGGTGCCAGCAGCCGCGGTAATTCCAGCTCCAA-TA  
GCGTATACTAAATTTGTTCAGTTAAAA-AGC-TCGTAGTTTAGACTGAGATTCTTG-G  
GT-CTAG--CGGTCTGATTGCCTTACCGGTTAATGTTT--GAT-TCGTAAGCTTTTAT  
AGTAGAATTTT-C-ATTTT-A-TTATTAAGTTA-CCAAGGAGTTTCCAACCTGC-CCA--TG  
GTAGCTAGCAATAGTTA--TC-AATC--GGGTGATCCACTGTGAGAAAA-TTGTAGTGTT  
CAAAGCA--GA-C---GT---TT-CGTTTGTCAATGCAGCATGGTATGGTAAAAATATG  
ACAC---TAAATGTAT-GTTGGTTG-TATA---TA-T-TAGTGAATGACTAATAGGGAA  
GGGCGGGCCGTTTATTTGATGGGCGAGAGGTGAAATTCGTTGACCCTATCAAGATACA  
CAACAGCGAAAGCATTTCGGCAAGTACTTCTCCATTAATCAAGAACGAAAGTTTGGGGATC  
GAAGACGATCAGATACCGTCTGATGCCAAACCATAAACTATGTGACACAGGGATTGGACG  
GATAAT-TTTTTAAAAACTCGCTCAGAACCTT-GTGAGAAATCAT-GAGTGTGGACTC  
TGGGGGAGTATGGTTCGCAAGTCTGAACTTAAAGGAATTGACGGAAGGGCACACAATGG  
AGTGGAA-CCTGCGGCTTAATTT-GACTCAACTCGGGAAA-ACTTACCAAGCTCAGATAT  
AATAAGGATTGACAGA-CTAA-AAGATCTTTCATGATTGTATAAGTGGTGGTGCATGGTC  
GTTCTTAG-TTGGTGGAGTATTGTCTGGTCAATTCCGATAACGGACGAGACCTCTACT  
TACTAACTAGTGGTATTTTGGTCAATATGGGAGATAGTCATT-TGGTGTGGTAGT-  
AGGC--CGTCAAAA-GCTT---GCTATTCTTCATTGAG-TGGTGTGTATTCTGATCAGA  
TAG--GTACTAACAAAAAATA---AA-CTTCTTAGAAGGACTACCT-ACCTCAAGTGG  
GGGG-AAGTCGGAGGCAATAACAGGTCTGTGATGCCCTTAGATACCTT-GGGCTGCACGC  
GCGTTACAATGTAGGCGAGAAAAAGGT---TTCC-----GGAATCGA-AAG---GT  
TTC-GGTAATCATTTGAATTGCCTACGTAATGGGGATTA-ATTTTTGTAATTATCGATTA  
TCAACGAGGAATTCCTTGTAAAGCGTAAATCATTACTTTACGCTGAATATGTCCCTGCCCT  
TTGTACACACCGCCCGTCTCTACCGATCGAACGATTAGGTAATAACTGACGGACTA--  
--GGC-GATTTT--TT--AAGC-CATGG---TTGAT-----CCT-GGT-GAACC--TG  
-CA-GAAGGAT--C---A---GCC-

>KP167480.1\_Heterostelium\_ampliverticillatum

TCCAAG-TATAA-CCTTTC-TACGGTGAAC----CTGCAGAAAGGATCAAGT-ACAA--CA

--TGT---AGATAAACTA-AAGAACTTTTCGC-GCTTC-----GGCGTTCT-GGATAACCG  
CAGTAAATCGGGGCTAATACATGTAAA-CG-AGAGGATGAGCGGG----CAACTGCG-AG  
TCTTTGCGATTGTT---A-GCT-TTTATT---CACACCAACCTCTTCGGAGTTTGTGGT  
GAGTCCGAACAATATTGCTGATCGGAA-----ACT-TGTTCCGACGAGTCTTTGT  
GTCAGTCCCTATCAACTTTCGATGGTAAGGTATTGGCTTACCATGGTTGTAACGGGTGA  
CGGGGAATCAGGGTTCGATTCGGGAGAGGGAGCCTGAGAAATGGCTACCATTCTATGGA  
AGGCAGCAGGCGCGCAAATT-ACTCAATCCCAATAC-GGGGAAGTAGTGACAAAAAATAC  
TAATGCCTTTCCATTTATATGGGGG--GCAATTGGAATAAGTACAATTTAAATCGCTTAG  
CA-AAAGTGATTGGAGGGCAAGTCTGGTGCCAGCAGCCGCGGTAATTCCAGCTCCAA-TA  
GCGTATACTAAATTTGTTGCAGTTAAAA-AGC-TCGTAGTTGAGATAGAGATTCTCG-G  
GT-TTAG--CGGTCGTTATTGCCTTCACGGGTTAATAATT-TGAT-TCGTAAAGCTTTAT  
AGTAAGATTCC-A-TCTTA-TTATTAAGTTA-CCGAGGAATTTCCAAGTGC-CCA--TG  
GTAAGTGGTAACAGTTA--TC-AATC--GGGTGATCTACTGTGAGAAAA-TTGTAGTGT  
CAAAGCA--GG-C---GT----TTACGTTTGTTCATGCAGCATGGTATAGTAAAAATG  
ACAC---TAAATATAT-GTTGGTTG-TATA---TTCT-TAGTGAATGACTAATAGGGAA  
GGGCGGGCCGTTCAATTGATGGGCGAGAGGTGAAATTCGTTGACCCTATCAAGATGCA  
CTACAGCGAAAGCATTTCGGCAAGTACTTCTCCATTAATCAAGAACGAAAGTTTGGGGATC  
GAAGACGATCAGATACCGTCGTAGTCCAAACCATAAACTATGTGACACAGGGATTGGACG  
GATAAT-TTTTTAAAACTCGCTCAGAACCTT-GTGAGAAATCAT-GAGTGTGGACTC  
TGGGGGAGTATGGTCGCAAGTCTGAAACTTAAAGGAATTGACGGAAGGGCACACAATGG  
AGTGGA-CCTGCGGCTTAATTT-GACTCAACTCGGGAAA-ACTTACCAAGCTCAGATAT  
AATAAGGATTGACAGA-CTAA-AAGATCTTTCATGATTGTATAAGTGGTGGTGCATGGTC  
GTTCTTAG-TTGGTGGAGTGTATTGTCTGGTCAATTCCGATAACGGACGAGACCTTACC  
TACTAACTAGTGGTATTTATTTGGTCAATTATGGGAGATAGTCATT-TGGTGTGGTAGT-  
AGGC--CGTCAAAA-GTTTA----CTATTCTTCATTGAG-TGGTGTGATCCTGATCAGA  
TAG--GTACTATCTAAAAAATA---AA-CTTCTTAGAGGGACTACCT-ACCTCAAGTGG  
GGGG-AAGTCGGAGGCAATAACAGGTCTGTGATGCCCTTAGATACCTT-GGGCTGCACGC  
GCGTTACAATGTAGACGAGAAAAAGGC----TTCC-----GACATCGA-AAG---GT  
GCC-GGTAATCAATTGAATTGTCTACGTAATGGGGATTA-ATTTTTGTAATTATCGATTA  
TCAACGAGGAATTCCTTGTAAAGCGTAAATCATTACTTTACGCTGAATATGTCCCTGCCCT  
TTGTACACACCGCCCGTCTCCTACCGATCGAACGATTAGGTA AAAACTGACGGACTG--  
--AAC-GACT----GT---AAC-C-TGG---TTGAT-----CCT-----  
-----GCC-

>KP16749.1\_Heterostelium\_cumulocystum

-----AT---ACAA--CA  
---GT---GATAAACTA-AAGAACTTTTCGC-GCTTC-----GGCGTTCT-GGATAACCG  
CAGTAAATCGGGGCTAATACATGTAAA-CG-AGAGGATGAGCGGG----CAACTGCG-AG  
TCTTTGCGATTGTT---A-GCT-TTTATT---CACACCAACCTCTTCGGAGTTTGTGGT  
GAGTCCGAACAATATTGCTGATCGGAA-----ACT-TGTTCCGACGAGTCTTTGT  
GTCAGTCCCTATCAACTTTCGATGGTAAGGTATTGGCTTACCATGGTTGTAACGGGTGA  
CGGGGAATCAGGGTTCGATTCGGGAGAGGGAGCCTGAGAAATGGCTACCATTCTATGGA  
AGGCAGCAGGCGCGCAAATT-ACTCAATCCCAATAC-GGGGAAGTAGTGACAAAAAATAC  
TAATGCCTTTCCATTTATATGGGGG--GCAATTGGAATAAGTACAATTTAAATCGCTTAG  
CA-AAAGTGATTGGAGGGCAAGTCTGGTGCCAGCAGCCGCGGTAATTCCAGCTCCAA-TA  
GCGTATACTAAATTTGTTGCAGTTAAAA-AGC-TCGTAGTTGAGATAGATTCTCG-G  
GT-TTAG--CGGTCGTTATTGCCTTCACGGGTTAATAATT-TGAT-TCGTAAAGCTTTAT  
AGTAAGATTCC-A-TCTTA-TTATTAAGTTA-CCGAGGAATTTCCAAGTGC-CCA--TG  
GTAAGTGGTAACAGTTA--TC-AATC--GGGTGATCTACTGTGAGAAAA-TTGTAGTGT  
CAAAGCA--GG-C---GT----TTACGTTTGTTCATGCAGCATGGTATAGTAAAAATG  
ACAC---TAAATATAT-GTTGGTTG-TATA---TTCT-TAGTGAATGACTAATAGGGAA  
GGGCGGGCCGTTCAATTGATGGGCGAGAGGTGAAATTCGTTGACCCTATCAAGATGCA  
CTACAGCGAAAGCATTTCGGCAAGTACTTCTCCATTAATCAAGAACGAAAGTTTGGGGATC  
GAAGACGATCAGATACCGTCGTAGTCCAAACCATAAACTATGTGACACAGGGATTGGACG  
GATAAT-TTTTTAAAACTCGCTCAGAACCTT-GTGAGAAATCAT-GAGTGTGGACTC  
TGGGGGAGTATGGTCGCAAGTCTGAAACTTAAAGGAATTGACGGAAGGGCACACAATGG  
AGTGGA-CCTGCGGCTTAATTT-GACTCAACTCGGGAAA-ACTTACCAAGCTCAGATAT  
AATAAGGATTGACAGA-CTAA-AAGATCTTTCATGATTGTATAAGTGGTGGTGCATGGTC  
GTTCTTAG-TTGGTGGAGTGTATTGTCTGGTCAATTCCGATAACGGACGAGACCTTACC  
TACTAACTAGTGGTATTTATTTGGTCAATTATGGGAGATAGTCATT-TGGTGTGGTAGT-  
AGGC--CGTCAAAA-GTTTA----CTATTCTTCATTGAG-TGGTGTGATCCTGATCAGA  
TAG--GTACTATCTAAAAAATA---AA-CTTCTTAGAGGGACTACCT-ACCTCAAGTGG  
GGGG-AAGTCGGAGGCAATAACAGGTCTGTGATGCCCTTAGATACCTT-GGGCTGCACGC  
GCGTTACAATGTAGACGAGAAAAAGGC----TTCC-----GACATCGA-AAG---GT  
GCC-GGTAATCAATTGAATTGTCTACGTAATGGGGATTA-ATTTTTGTAATTATCGATTA  
TCAACGAGGAATTCCTTGTAAAGCGTAAATCATTACTTTACGCTGAATATGTCCCTGCCCT  
TTGTACACACCGCCCGTCTCCTACCGATCGAACGATTAGGTA AAAACTGACGGACTG--  
--AAC-GACT-----  
-----GCC-

>HQ141503.1\_Heterostelium\_asymmetricum\_HN20C

TCTAAG-TATAA-CCTTTA-TACGGTGAAC----CTGCAGAAGGATCAACT-ACGG--CA  
--TGT---AGATAAACTA-AAGAACTTTTCGC-GCTTC-----CGGGTCTT-GGATAACCG  
CAGTAAATCGGGGCTAATACATGTAAA-CG-AGAGGATGAGCAGG----CAACTGCG-AG  
TCTTTGCGATTGTT---A-GCTATTCATT---CACACCAACCTCTTCGGAGTTTGTGGT

GAGTCCGAACAATATTGCTGATCGGAA-----ACT-TGTTCCGACGAGTTCTTTGT  
GTCCTGCCCTATCAACTTTCGATGGTAAGGTATTGGCTTACCATGGTTGTAACGGGTGA  
CGGGGAATCAGGGTTCGATTCCGGAGAGGGAGCCTGAGAAATGGCTACCACTTCTACGGA  
AGGCAGCAGGCGCGCAAATT-ACTCAATCCCAATAC-GGGGAAGTAGTGACAAAAAATAC  
TAATGCCTTTCCATTTATATGGGGG--GCAATTGGAATAAGTACAACCTAAATCGCTTAA  
CG-AAAGTGATTGGAGGGCAAGTCTGGTGCCAGCAGCCGCGGTAATTCCAGCTCCAA-TA  
CGGTATACTAAAATTTGTTGTCAGTTAAAA-AGC-TCGTAGTTGAGATTGAGATTCTTG-G  
GT-TTAG--CGTCCAAGATTGCCTTACCGGGTAAATCTTT-TGGT-ACGTAAAGCTTTTC  
AGTGGAAATTCT-ATTT-CA-TTGTAAAAGTTA-CCAAGGAATTTCTATCTGC-CCA--TT  
TAAGGTGGCAACACTT---TA-AATTTAGGGTGATCTACTGTGAGAAAA-TTGTAGTGT  
CAAAGCA--GG-C---GTT---TT-CGCTTGTCAATGCAGCATGGTATAGTAAAAATAG  
ACAC---TAAATATAT-GTTGGTTG-TATA---TT-T-TAGTGAATGACTAATAGGGAA  
GGGCGGGGCCGTTCAATTTGATGGGCGAGAGGTGAAATTCGTTGACCCTATCAAGATGCA  
CTACAGCGAAAGCATTCCGGCAAGTACTTCTCCATTAATCAAGAACGAAAAGTTTGGGGATC  
GAAGACGATCAGATACCGTCTAGTCCAAACCATAAACTATGTGACACAGGGATTGGACG  
GATAAT-TTTTTAAAAAATCGCTCAGAACCTT-GTGAGAAATCAT-GAGTGTGGACTC  
TGGGGGGAGTATGGTGCAGAGTCTGAAACTTAAAGGAATTGACGGAAGGGCACACAATGG  
AGTGGAA-CCTGCGGCTAATTT-GACTCAACTCGGGAAA-ACTTACCAAGCTCAGATAT  
AATAAGGATTGACAGA-CTAA-AAGATCTTTCATGATTGTATAAGTGGTGGTGCATGGTC  
GTTCTTAG-TTGGTGGAGTGATTTGTCTGGTCAATTCCGATAACGGACGAGACCTTACT  
TACTAACTAGTGGTATTTATTTGGTCAATATGGGAGATAGCTATT-TGGTGTGGT-GTT  
AGGC--CGTCAAAA-GTTTA---GC-ATTCTTATTGAG-TGGTGTGATTCTGATCAGA  
TAG--GTACTAAAATTTAAATA---AA-CTTCTAGAAGGACTACCT-ACCTCAAGTGG  
GGGG-AAGTCGGAGGCAATAACAGGTCTGTGATGCCCTTAGATACCTT-GGGCTGCACGC  
GCGTTACAATGTAGGCGAGAAAAAGGT----TTCC-----GGAACCGA-AAG---GT  
TTC-GGTAATCATTGAATTGCCTACGTAATGGGGATTA-ATTTTTGTAATTATCGATTA  
TCAACGAGGAATTCCTTGTAAAGCTAAATCATTACTTTACGCTGAATATGTCCTGCCCT  
TTGTACACACCGCCGCTCGCTCCTACCGATCGAACGATTAGGTA AAAACTGACGGACTA--  
--GGC-GACTTT--C---AAC-C-TGGTTGATCCT-----GC--GGT-GAACC--TG  
-CA-GAAGGAT--C---A----C--

>AM168097.1 *Heterostelium asyetricum* OH567

TCTAAG-TATAA-CCTTTA-TACGGTGAAA---CTGCAGACGGCTCATT--ACAA--CA  
---GT---GATAAACTA-AAGAACTTCCGC-GCTTC-----GGCGTCTT-GGATAACCG  
CAGTAAATCGGGGCTAATACATGTAAA-CG-AGAGGATGAGCAGG---CAACTGCG-AG  
TCTTTGCGATTGTT---A-GCTATTATT---CACACCAACCTCTTCGGAGTTTGTGGT  
GAGTCCGAACAATATTGCTGATCGGAA-----ACT-TGTTCCGACGAGTTCTTTGT  
GTCATGCCCTATCAACTTTCGATGGTAAGGTATTGGCTTACCATGGTTGTAACGGGTGA  
CGGGGAATCAGGGTTCGATTCCGGAGAGGGAGCCTGAGAAATGGCTACCACTTCTACGGA  
AGGCAGCAGGCGCGCAAATT-ACTCAATCCCAATAC-GGGGAAGTAGTGACAAAAAATAC  
TAATGCCTTTCCATTTATATGGGGG--GCAATTGGAATAAGTACAACCTAAATCGCTTAA  
CG-AAAGTGATTGGAGGGCAAGTCTGGTGCCAGCAGCCGCGGTAATTCCAGCTCCAA-TA  
GCGTATACTAAAATTTGTTGCAGTAAAA-AGC-TCGTAGTTGAGATTGAGATTCTTG-G  
GT-TTAG--CGTCCAAGATTGCCTTACCGGGTAAATCTTT-TGGT-ACGTAAAGCTTTTC  
AGTGGAAATTCT-ATTT-CA-TTGTAAAAGTTA-CCAAGGAATTTCTATCTGC-CCA--TT  
TAAGGTGGCAACACTT---TA-AATTTAGGGTGATCTACTGTGAGAAAA-TTGTAGTGT  
CAAAGCA--GG-C---GTT---TT-CGCTTGTCAATGCAGCATGGTATAGTAAAAATAG  
ACAC---TAAATATAT-GTTGGTTG-TATA---TT-T-TAGTGAATGACTAATAGGGAA  
GGGCGGGGCCGTTCAATTTGATGGGCGAGAGGTGAAATTCGTTGACCCTATCAAGATGCA  
CTACAGCGAAAGCATTCCGCAAGTACTTCTCCATTAATCAAGAACGAAAAGTTTGGGGATC  
GAAGACGATCAGATACCGTCTAGTCCAAACCATAAACTATGTGACACAGGGATTGGACG  
GATAAT-TTTTTAAAAAATCGCTCAGAACCTT-GTGAGAAATCAT-GAGTGTGGACTC  
TGGGGGGAGTATGGTGCAGAGTCTGAAACTTAAAGGAATTGACGGAAGGGCACACAATGG  
AGTGGAA-CCTGCGGCTAATTT-GACTCAACTCGGGAAA-ACTTACCAAGCTCAGATAT  
AATAAGGATTGACAGA-CTAA-AAGATCTTTCATGATTGTATAAGTGGTGGTGCATGGTC  
GTTCTTAG-TTGGTGGAGTGATTTGTCTGGTCAATTCCGATAACGGACGAGACCTTACT  
TACTAACTAGTGGTATTTATTTGGTCAATATGGGAGATAGCTATT-TGGTGTGGT-GTT  
AGGC--CGTCAAAA-GTTTA---GC-ATTCTTATTGAG-TGGTGTGATTCTGATCAGA  
TAG--GTACTAAAATTTAAATA---AA-CTTCTAGAAGGACTACCT-ACCTCAAGTGG  
GGGG-AAGTCGGAGGCAATAACAGGTCTGTGATGCCCTTAGATACCTT-GGGCTGCACGC  
GCGTTACAATGTAGGCGAGAAAAAGGT----TTCC-----GGAACCGA-AAG---GT  
TTC-GGTAATCATTGAATTGCCTACGTAATGGGGATTA-ATTTTTGTAATTATCGATTA  
TCAACGAGGAATTCCTTGTAAAGCTAAATCATTACTTTACGCTGAATATGTCCTGCCCT  
TTGTACACACCGCCGCTCGCTCCTACCGATCGAACGATTAGGTA AAAACTGACGGACTA--  
--GGC-GACTTT--CT--CGC-A-AGG-GATTGTT-----GTT-TGG-GAAG--TTA  
-GT-TAAATCT--C---ATT--GTTT

>MN752217.1 *Heterostelium multibrachiatum* 5916lun

TCTAAG-TATAA-CCTTTA-TACGGTGAAA---CTGCAGACGGCTCATT--ACAA--CA  
---GT---GATAAACTA-AAGAACTTCCGC-GCTTC-----GGCGTTTT-GGATAACCG  
CAGTAAATCGGGGCTAATACATGTAAA-CG-AGAGGATGAACGGG---CAACTGTG-AG  
TCTTTGCGATTGTT---A-GCT-TTAAT---CA--CCAACCTCTTCGGAGTCAAGTGT  
GAATCCCTACAATATTGCTGATCGGAA-----ACT-TGTTCCGACGAGTTCTTTGT  
GTCCTGCCCTATCAACTTTCGATGGTAAGGTATTGGCTTACCATGGTTGTAACGGGTGA  
CGGGGAATCAGGGTTCGATTCCGGAGAGGGAGCCTGAGAAATGGCTACCACTTCTACGGA



AGGCAGCAGGCGCGCAAATT-CTCAATCCCAATAC-GGGGAAGTAGTGACAAAAAATAC  
TAATGCCTTTCCATTTATATGGGGG--GCAATTGGAATAAGTACAATTTAAATCGCTTAA  
CG-AAAGTGATTGGAGGGCAAGTCTGGTGCCAGCAGCCGCGGTAATTCCAGCTCCAA-TA  
GCGTATACTAAATTTGTTGCAGTTAAAA-AGC-TCGTAGTTGAGATTGAGATTTCTCA-G  
GT-TTAG--CGGTCAACATTGCTTACAGGGTAAATG-TT-TGAT-ACGTAAGCTTTAT  
AGTAGAATTTT-ATTTT-A-TTATTAAGTTA-CTGAGGAATTTCCAAGTGC-CCA--TG  
GTAGCCAGCAATGGTTA--TC-AATA--GGGTGATCTACTGTGAGAAAA-TTGTAGTGT  
CAAAGCA--GG-C---GTC---TTTCGTTTGTCAATGCAGCATGGTATAGTTAAATATG  
ACAC---TAAATATAT-GTTGGTTG-TATA---T-CT-TAGTGAATGACTAATAGGGAA  
GGGCGGGGCCGTTCAATTGATGGGCGAGAGGTGAAATTCGTTGACCCTATCAAGATGCA  
CTACAGCGAAAGCATTCGGCAAGTACTTCTCCATTAATCAAGAACGAAAGTTTGGGGATC  
GAAGACGATCAGATACCGTCGTAGTCCAAACCATAAACTATGTCGACCAGGGATTGGACG  
GATAAT-TTTTTAAAAACTCGCTCAGAACCTT-GTGAGAAATCAT-GAGTGTGGACTC  
TGGGGGGAGTATGGTTCGCAAGTCTGAACTTAAAGGAATTGACGGAAGGGCACACAATGG  
AGTGGAA-CCTGCGGCTTAATTT-GACTCAACTCGGGAAA-ACTTACCAAGCTCAGATAT  
AATAAGGATTGACAGA-CTAA-AAGATCTTTCATGATTGTATAAGTGGTGGTGCATGGTC  
GTTCTTAG-TTGGTGGAGTGATTTGTCTGGTCAATTCCGATAACGGACGAGACCTCTACT  
TACTAAGTAGTATTTATTTGGTCAATATGGGAGATAGTCATT-TGGTGTGGTAGT-  
AGGA--CGTCAAAA-TCTTA----CTATTCTTATTGAG-TGGTGTGATTCTGATCAGA  
TAG--GTACTAATTTTAAAAATA---AA-CTTCTTAGAAGGACTACCT-ACCTCAAGTGG  
GGGG-AAGTCGGAGGCAATAACAGGTCTGTGATGCCCTTAGATACCTT-GGGCTGCACGC  
GCGTTACAATGTAGGCGAGAAAAAGGT----TTCC-----GGAATCGA-AAG---GT  
TTC-GGTAATCAATTGAATTCCTACGTAATGGGGATTA-ATTTTGTAAATATCGATTA  
TCAACGAGGAATTCCTTGTAAAGCGTAAATCATTACTTTACGCTGAATATGTCCCTGCCCT  
TTGTACACACCGCCCGTCTCTACCGATCGAACGATTAGGTAAAACACTGACGGACTA--  
--GGC-GACTCT--TC---CGC-A-AGG-ATTTGTT-----GTT-TGG-GAAG--TTA  
-GT-TAAATCT--C----ATT--GTTT

>MN752218.1 *Heterostelium multibrachiatum*\_5904lun

TCTAAG-TATAA-CCTTTA-TACGGTGAAA----CTGCAGACGGCTCATT--ACAA--CA  
---GT---GATAAACTA-AAGAACTTCCGC-GCTTC-----GGCGTTTT-GGATAACCG  
CAGTAAATCGGGGTAATACATGTAATAA-CG-AGAGGATGAACGGG---CAACTGTG-AG  
TCTTTGCGATTGTT---A-GCT-TTAAAT---CA--CCAACCTCTTCGGAGTCAGTGGT  
GAATCCCTACAATATTGCTGATCGGAA-----ACT-TGTTTCCGACGAGTCTTTGT  
GTCAGTCCCTATCAACTTTCGATGGTAAGGTATTGGCTTACCATGGTTGTAACGGGTGA  
CGGGGAATCAGGGTTCGATTCCGGAGAGGGAGCCTGAGAAATGGCTACCCTTCTACGGA  
AAGCAGCAGGCGCGCAAAT-ACTCAATCCCAATAC-GGGGAAGTAGTGACAAAAAATAC  
TAATGCCTTTCCATTTATATGGGGG--GCAATTGGAATAAGTACAATTTAAATCGCTTAA  
CG-AAAGTGATTGGAGGGCAAGTCTGGTGCCAGCAGCCGCGGTAATTCCAGCTCCAA-TA  
GCGTATACTAAATTTGTTGCAGTTAAAA-AGC-TCGTAGTTGAGATTGAGATTTCTCA-G  
GT-TTAG--CGGTCAACATTGCCTTACAGGGTAAATG-TT-TGAT-ACGTAAGCTTTAT  
AGTAGAATTTT-ATTTT-A-TTATTAAGTTA-CTGAGGAATTTCCAAGTGC-CCA--TG  
GTAGCCAGCAATGGTTA--TC-AATA--GGGTGATCTACTGTGAGAAAA-TTGTAGTGT  
CAAAGCA--GG-C---GTC---TTTCGTTTGTCAATGCAGCATGGTATAGTTAAATATG  
ACAC---TAAATATAT-GTTGGTTG-TATA---T-CT-TAGTGAATGACTAATAGGGAA  
GGGCGGGGCCGTTCAATTGATGGGCGAGAGGTGAAATTCGTTGACCCTATCAAGATGCA  
CTACAGCGAAAGCATTCGGCAAGTACTTCTCCATTAATCAAGAACGAAAGTTTGGGGATC  
GAAGACGATCAGATACCGTCGTAGTCCAAACCATAAACTATGTCGACCAGGGATTGGACG  
GATAAT-TTTTTAAAAACTCGCTCAGAACCTT-GTGAGAAATCAT-GAGTGTGGACTC  
TGGGGGGAGTATGGTTCGCAAGTCTGAACTTAAAGGAATTGACGGAAGGGCACACAATGG  
AGTGGAA-CCTGCGGCTTAATTT-GACTCAACTCGGGAAA-ACTTACCAAGCTCAGATAT  
AATAAGGATTGACAGA-CTAA-AAGATCTTTCATGATTGTATAAGTGGTGGTGCATGGTC  
GTTCTTAG-TTGGTGGAGTGATTTGTCTGGTCAATTCCGATAACGGACGAGACCTCTACT  
TACTAAGTAGTATTTATTTGGTCAATATGGGAGATAGTCATT-TGGTGTGGTAGT-  
AGGA--CGTCAAAA-TCTTA----CTATTCTTATTGAG-TGGTGTGATTCTGATCAGA  
TAG--GTACTAATTTTAAAAATA---AA-CTTCTTAGAAGGACTACCT-ACCTCAAGTGG  
GGGG-AAGTCGGAGGCAATAACAGGTCTGTGATGCCCTTAGATACCTT-GGGCTGCACGC  
GCGTTACAATGTAGGCGAGAAAAAGGT----TTCC-----GGAATCGA-AAG---GT  
TTC-GGTAATCAATTGAATTCCTACGTAATGGGGATTA-ATTTTGTAAATATCGATTA  
TCAACGAGGAATTCCTTGTAAAGCGTAAATCATTACTTTACGCTGAATATGTCCCTGCCCT  
TTGTACACACCGCCCGTCTCTACCGATCGAACGATTAGGTAAAACACTGACGGACTA--  
--GGC-GACTCT--TC---CGC-A-AGG-ATTTGTT-----GTT-TGG-GAAG--TTA  
-GT-TAAATCT--C----ATT--GTTT

>AM168096.1 *Heterostelium anisocaulis*\_NZ47B

TCTAAG-TATAA-CCTTTA-TACGGTGAAA----CTGCAGACGGCTCATT--ACAA--CA  
---GT---GATAAACTA-AAGAACTTCCGC-GCTTC-----GGCGTTTT-GGATAACCG  
CAGTAAATCGGGGTAATACATGTAATAA-CG-AGAGGATGAACGGG---CAACTGTG-AG  
TCTTTGCGATTGTT---A-GCT-TTAAAT---CA--CCAACCTCTTCGGAGTCGGTGGT  
GAATCCCTACAATATTGCTGATCGGAA-----ACT-TGTTTCCGACGAGTCTTTGT  
GTCAGTCCCTATCAACTTTCGATGGTAAGGTATTGGCTTACCATGGTTGTAACGGGTGA  
CGGGGAATCAGGGTTCGATTCCGGAGAGGGAGCCTGAGAAATGGCTACCCTTCTACGGA  
AGCAGCAGGCGCGCAAAT-ACCCAATCCCAATAC-GGGGAAGTAGTGACAAAAAATAC  
TAATGCCTTTCCATTTATATGGGGG--GCAATTGGAATAAGTACAATTTAAATCGCTTAA  
CG-AAAGTGATTGGAGGGCAAGTCTGGTGCCAGCAGCCGCGGTAATTCCAGCTCCAA-TA

GCGTATACTAAAATTTGTTGCAGTTAAAA-AGC-TCGTAGTTGAGATTGAGATTCTCA-G  
GT-TTAG--CGGTCAACATTGCCTTCACGGGTTAATG-TT-TGAT-ACGTAAAGCTTTAT  
AGTAGAATTTT-C-ATTTT-A-TTATTAAGTTA-CTGAGGAATTTCCAACCTGC-CCA--TG  
GTAGCCAGTAATGGTTA--TC-AATA--GGGTGATCTACTGTGAGAAAA-TTGTAGTGT  
CAAAGCA--GG-C---GTC---TTTCGTTTGTTCATGCAGCATGGTATAGTTAAATATG  
ACAC---TAGATATAT-GTTGGTTG-TATA---TTGT-TAGTGAATGACTAATAGGGAA  
GGGCGGGCCGTTCAATTTGATGGGCGAGAGGTGAAATTCGTTGACCCTATCAAGATGCA  
CTACAGCGAAAGCATTTCGGCAAGTACTTCTCCATTAATCAAGAACGAAAAGTTGGGGATC  
GAAGACGATCAGATACCGTCGTAGTCCAAACCATAAACTATGTGACACAGGGATTGGACG  
GATAAT-TTTTTAAAAAGCTCGCTCAGAACCTT-GTGAGAAATCAT-GAGTGTGGACTC  
TGGGGGGAGTATGGTCGCAAGTCTGAAACTTAAAGGAATTGACGGAAGGGCACACAATGG  
AGTGGAA-CCTGCGGCTTAATTT-GACTCAACTCGGGAAA-ACTTACCAAGCTCAGATAT  
AATAAGGATTGACAGA-CTAA-AAGATCTTTCATGATTGTATAAGTGGTGGTGCATGGTC  
GTTCTTAG-TTGGTGGAGTGATTTGTCTGGTCAATTCCGATAACGGACGAGACCTACT  
TACTAACTAGTGATATTTATTTGGTCAATATGGGAGATAGTCATT-TGGTGTGGTAGT-  
AGGA--CGTCAAAA-TCTTA----CTATTCTTCATTGAG-TGGTGTGATTCTGATCAGA  
TAG--GTACTAATTTAAAAATA---AA-CTTCTTAGAAGGACTACCT-ACCTCAAGTGG  
GGGG-AAGTCGGAGGCAATAACAGGTCTGTGATGCCCTTAGATACCTT-GGGCTGCACGC  
CGGTTACAATGTAGGCGAGAAAAAGGT----TTCC-----GGAATCGA-AAG---GT  
TTC-GGTAATCAATTTGAATTCGCTACGTAATGGGGATTA-ATTTTGTAAATATCGATTA  
TCAACGAGGAATTCCTTGTAAAGCGTAAATCATTACTTTACGCTGAATATGTCCTGCCCT  
TTGTACACACCGCCCGTCGCTCCTACCGATCGAACGATTAGGTA AAAACTGACGGACTA--  
--GGC-GACTCT--TC---CGC-A-AGG-ATTTGTT-----GTT-TGG-GAAG--TTA  
-GT-TAAATCT--C----ATT--GTTT

>AM168107.1 Heterostelium\_pseudocandidum\_TNS\_C\_91

TCTAAG-TATAA-CCTTTA-TACGGTGAAG----CTGCAGACGGCTCATT--ACAA--CA  
---GT---GATAAAGCTA-AAGAAGCTCCGC-GCTTC-----GGCGTTTT-GGATAACCG  
CAGTAAATCGGGGCTAATACATGTAAA-CG-AGAGGATGAACGGG---CAACTGTG-AG  
TCTTTGCGATTGTT---A-GCT-TTAAT---CA--CCAACCTCTTCGGAGTCAGTGGT  
GAATCCCTACAATATTGCTGATCGGAA-----ACT-TGTTCCGACGAGTCTTTGT  
GTCACTGCCCTATCAACTTTCGATGGTAAGGTATTGGCTTACCATGGTTGTAACGGGTGA  
CGGGAATCAGGGTTCGATTCCGGAGAGGGAGCCTGAGAAAATGGCTACCCTTCTACGGA  
AGGCAGCAGGCGCGCAAATT-ACTCAATCCCAATAC-GGGGAAGTAGTGACAAAAAATAC  
TAATGCCTTTCCATTTATATGGGGG--GCAATTGGAATAAGTACAATTTAAATCGCTTAA  
CG-AAAGTGATTGGAGGGCAAGTCTGGTGCCAGCAGCCGCGGTAATTCCAGCTCCAA-TA  
GCGTATACTAAAATTTGTTGCAGTTAAAA-AGC-TCGTAGTTGAGATTGAGATTCTCA-G  
GT-TTAG--CGGTCAACATTGCCTTACGGGTTAATG-TT-TGAT-ACGTAAAGCTTTAT  
AGTAGAATTTT-C-ATTTT-A-TTATTAAGTTA-CTGAGGAATTTCCAACCTGC-CCA--TG  
GTAGCCAGCAATGGTTA--TC-AATA--GGGTGATCTACTGTGAGAAAA-TTGTAGTGT  
CAAAGCA--GG-C---GTC---TTTCGTTTGTTCATGCAGCATGGTATAGTTAAATATG  
ACAC---TAAATATAT-GTTGGTTG-TATA---T-CT-TAGTGAATGACTAATAGGGAA  
GGGCGGGCCGTTCAATTTGATGGGCGAGAGGTGAAATTCGTTGACCCTATCAAGATGCA  
CTACAGCGAAAGCATTTCGGCAAGTACTTCTCCATTAATCAAGAACGAAAAGTTGGGGATC  
GAAGACGATCAGATACCGTCGTAGTCCAAACCATAAACTATGTGACACAGGGATTGGACG  
GATAAT-TTTTTAAAAAAGCTCGCTCAGAACCTT-GTGAGAAATCAT-GAGTGTGGACTC  
TGGGGGGAGTATGGTCGCAAGTCTGAAACTTAAAGGAATTGACGGAAGGGCACACAATGG  
AGTGGAA-CCTGCGGCTTAATTT-GACTCAACTCGGGAAA-ACTTACCAAGCTCAGATAT  
AATAAGGATTGACAGA-CTAA-AAGATCTTTCATGATTGTATAAGTGGTGGTGCATGGTC  
GTTCTTAG-TTGGTGGAGTGATTTGTCTGGTCAATTCCGATAACGGACGAGACCTACT  
TACTAACTAGTGATATTTATTTGGTCAATATGGGAGATAGTCATT-TGGTGTGGTAGT-  
AGGA--CGTCAAAA-TCTTA----CTATTCTTCATTGAG-TGGTGTGATTCTGATCAGA  
TAG--GTACTAATTTAAAAATA---AA-CTTCTTAGAAGGACTACCT-ACCTCAAGTGG  
GGGG-AAGTCGGAGGCAATAACAGGTCTGTGATGCCCTTAGATACCTT-GGGCTGCACGC  
CGGTTACAATGTAGGCGAGAAAAAGGT----TTCC-----GGAATCGA-AAG---GT  
TTC-GGTAATCAATTTGAATTCGCTACGTAATGGGGATTA-ATTTTGTAAATATCGATTA  
TCAACGAGGAATTCCTTGTAAAGCGTAAATCATTACTTTACGCTGAATATGTCCTGCCCT  
TTGTACACACCGCCCGTCGCTCCTACCGATCGAACGATTAGGTA AAAACTGACGGACTA--  
--GGC-GACTCT--TC---CGC-A-AGG-ATTTGTT-----GTT-TGG-GAAG--TTA  
-GT-TAAATCT--C----ATT--GTTT

>KP167482.1 Heterostelium\_pseudoplasmodiofascium

TCTAAG-TATAA-CCTTTT-TACGGTGAAG----CTGCAGAAGGATCAAGT-ACAA--CA  
--TGT---AGATAAAGCTA-AAGAAGCTCCGC-GCTTC-----GGCGTTTT-GGATAACCG  
CAGTAAATCGGGGCTAATACATGTAAA-CG-AGAGGATGAACGGG---CAACTGTG-AG  
TCTTTGCGATTGTT---A-GCT-TTAAT---CA--CCAACCTCTTCGGAGTCAGTGGT  
GAATCCCTACAATATTGCTGATCGGAA-----ACT-TGTTTCCGACGAGTCTTTGT  
GTCACTGCCCTATCAACTTTCGATGGTAAGGTATTGGCTTACCATGGTTGTAACGGGTGA  
CGGGGAATCAGGGTTCGATTCCGGAGAGGGAGCCTGAGAAAATGGCTACCCTTCTACGGA  
AGGCAGCAGGCGCGCAAATT-ACTCAATCCCAATAC-GGGGAAGTAGTGACAAAAAATAC  
TAATGCCTTTCCATTTATATGGGGG--GCAATTGGAATAAGTACAATTTAAATCGCTTAA  
CG-AAAGTGATTGGAGGGCAAGTCTGGTGCCAGCAGCCGCGGTAATTCCAGCTCCAA-TA  
GCGTATACTAAAATTTGTTGCAGTTAAAA-AGC-TCGTAGTTGAGATTGAGATTCTCA-G  
GT-TTAG--CGGTCCGCAT-GCCTTACGGGTT-TTGC-T-TGAT-ACGTAAAGCTTTAT  
AGTAGAATTTT-C-ATTTT-A-TTATTAAGTTA-CTGAGGAATTTCCAACCTGC-CCA--TG

GTTGTGACGAATGGCTT--CC-AATA--GGGTGATCTACTGTGAGAAAA-TTGTAGTGTT  
CAAAGCA--GG-C---GTC---TTTCGTTTGTTC AATGCAGCATGGTATAGTTAAATATG  
ACAC---TAAATATAT-GTTGGTTG-TATA---TTCT-TAGTGTAATGACTAATAGGGAA  
GGGCGGGGCCGTTCAATTGATGGGCGAGAGGTGAAATTCGTTGACCCTATCAAGATGCA  
CTACAGCGAAAGCATTCCGGCAAGTACTTCTCCATTAATCAAGAACGAAAAGTTTGGGGATC  
GAAGACGATCAGATACCGTCGTAGTCCAAACCATAAACTATGTGACCCAGGGATTGGACG  
GATAAT-TTTTTAAAAAATCGCTCAGAACCTT-GTGAGAAATCAT-GAGTGTTTGGACTC  
TGGGGGGAGTATGGTCGCAAGTCTGAAACTTAAAGGAATTGACGGAAGGGCACACAATGG  
AGTGGAA-CCTGCGGCTTAATTT-GACTCAACTCGGGAAA-ACTTACCAAGCTCAGATAT  
AATAAGGATTGACAGA-CTAA-AAGATCTTTCATGATTGTATAAGTGGTGGTGCATGGTC  
GTTCTTAG-TTGGTGGAGTGATTGTCTGGTCAATTCCGATAACGGACGAGACCTCTACT  
TACTAACTAGTGATATTTATTTGGCCAATATGGGAGATAGTCATT-TGGTGTGGTAGT-  
AGGA--CGTCAAAA-TCTT---GCTATTCTTCATTGAG-TGGTGTGATTCTGGTCAGA  
TAG--GTACTAATTTTAAAAATA---AA-CTTCTTAGAAGGACTACCT-ACCTCAAGTGG  
GGGG-AAGTCGAGGCAATAACAGGTCTGTGATGCCCTTAGATACCTT-GGGCTGCACGC  
GCGTTACAATGTAGGCGAGAAAAAGGT----TTCC-----GGAATCGA-AAG---GT  
TTC-GGTAATCAATTGAATTGCCTACGTAATGGGGATTA-ATTTTTGTAATTATCGATTA  
TCAACGAGGAATTCCTTGTAAAGCGTAAATCATTACTTTACGCTGAATATGTCCTGCCCT  
TTGTACACACCGCCCGTCTCTACCAGTGAACGATTAGGTAAAACTGACGGACTA--  
--GGC-GACTCTCTGT--A-C-C-TGG--TTGAT-----CCT-----  
-----GCC-

>KP167483.1 *Heterostelium parvimigratum*

TCTAAG-TATAA-CCTTTA-TACGGTGAAA----CTGCAGACGGATCAAT--ACAA--CA  
--GT---GATAAACTA-AAGAACTTCCGC-GCTTC-----GGCGTTTT-GGATAACCG  
CAGTAAATCGGGGCTAATACATGTAAA-CG-AGAGGATGAACGGG----CAACTGTG-AG  
TCTTTGCGATTGTT---A-GCT-TTAAT---CA--CCAACCTCTTCGGAGTCAGTGGT  
GAATCCCTACAATATGCTGATCGGAA-----ACT-TGTTTCCGACGAGTTCCTTGT  
GTCACTGCCCTATCAACTTTCGATGGTAAGGTATTGGCTTACCATGGTTGTAACGGGTGA  
CGGGGAATCAGGGTTCGATTCCGGAGAGGGAGCCTGAGAAAATGGCTACCCTTCTACGGA  
AGGCAGCAGGCGCGCAAAATT-ACTCAATCCCAATAC-GGGGAAGTAGTGACAAAAATAC  
TAATGCCTTTCCATTTATATGGGG--GCAATTGGAATAAGTACAATTTAAATCGCTTAA  
CG-AAAGTGATTGGAGGGCAAGTCTGGTGCCAGCAGCCGCGTAATCCAGCTCCAA-TA  
GCGTATACTAAATTTGTTGCAAGTAAAA-AGC-TCGTAGTTGAGATTGAGATTCTCA-G  
GT-TTAG--CGGTCGGCAT-GCCTTCACGGGT-TTGC-T-TGAT-ACGTAAGCTTTAT  
AGTAGAATTTT-ATTTT-A-TTATTAAGTTA-CTGAGGAATTTCCAACCTGC-CCA--TG  
GTTGTCAGCAATGGCTT--CC-AATA--GGGTGATCTACTGTGAGAAAA-TTGTAGTGTT  
CAAAGCA--GG-C---GTC---TTTCGTTTGTTC AATGCAGCATGGTATAGTTAAATATG  
ACAC---TAAATATAT-GTTGGTTG-TATA---TTCT-TAGTGTAATGACTAATAGGGAA  
GGGCGGGGCCGTTCAATTGATGGGCGAGAGGTGAAATTCGTTGACCCTATCAAGATGCA  
CTACAGCGAAAGCATTCCGGCAAGTACTTCTCCATTAATCAAGAACGAAAAGTTTGGGGATC  
GAAGACGATCAGATACCGTCAAGTCCAAACCATAAACTATGTGACCCAGGGATTGGACG  
GATAAT-TTTTTAAAAAATCGCTCAGAACCTT-GTGAGAAATCAT-GAGTGTTTGGACTC  
TGGGGGGAGTATGGTCGCAAGTCTGAAACTTAAAGGAATTGACGGAAGGGCACACAATGG  
AGTGGAA-CCTGCGGCTTAATTT-GACTCAACTCGGGAAA-ACTTACCAAGCTCAGATAT  
AATAAGGATTGACAGA-CTAA-AAGATCTTTCATGATTGTATAAGTGGTGGTGCATGGTC  
GTTCTTAG-TTGGTGGAGTGATTGTCTGGTCAATTCCGATAACGGACGAGACCTCTACT  
TACTAACTAGTGATATTTATTTGGCCAATATGGGAGATAGTCATT-TGGTGTGGTAGT-  
AGGA--CGTCAAAA-TCTT---GCTATTCTTCATTGAG-TGGTGTGATTCTGGTCAGA  
TAG--GTACTAATTTTAAAAATA---AA-CTTCTTAGAAGGACTACCT-ACCTCAAGTGG  
GGGG-AAGTCGAGGCAATAACAGGTCTGTGATGCCCTTAGATACCTT-GGGCTGCACGC  
GCGTTACAATGTAGGCGAGAAAAAGGT----TTCC-----GGAATCGA-AAG---GT  
TTC-GGTAATCAATTGAATTGCCTACGTAATGGGGATTA-ATTTTTGTAATTATCGATTA  
TCAACGAGGAATTCCTTGTAAAGCGTAAATCATTACTTTACGCTGAATATGTCCTGCCCT  
TTGTACACACCGCCCGTCTCTACCAGTGAACGATTAGGTAAAACTGACGGACTA--  
--GGC-GACTCT--TT--A-----  
-----GCC-

>KP167481.1 *Heterostelium migratissimum*

-----GATAAACTA-AAGAACTTCCGC-GCTTC-----GGCGTTTT-GGATAACCG  
CAGTAAATCGGGGCTAATACATGTAAA-CG-AGAGGATGAACGGG----CAACTGTG-AG  
TCTTTGCGATTGTT---A-GCT-TTAAT---CA--CCAACCTCTTCGGAGTCAGTGGT  
GAATCCCTACAATATTGCTGATCGGAA-----ACT-TGTTTCCGACGAGTTCCTTGT  
GTCACTGCCCTATCAACTTTCGATGGTAAGGTATTGGCTTACCATGGTTGTAACGGGTGA  
CGGGGAATCAGGGTTCGATTCCGGAGAGGGAGCCTGAGAAAATGGCTACCCTTCTACGGA  
AGGCAGCAGGCGCGCAAAATT-ACTCAATCCCAATAC-GGGGAAGTAGTGACAAAAATAC  
TAATGCCTTTCCATTTATATGGGG--GCAATTGGAATAAGTACAATTTAAATCGCTTAA  
CG-AAAGTGATTGGAGGGCAAGTCTGGTGCCAGCAGCCGCGTAATCCAGCTCCAA-TA  
GCGTATACTAAATTTGTTGCAAGTAAAA-AGC-TCGTAGTTGAGATTGAGATTCTCA-G  
GT-TTAG--CGGTCGGCAT-GCCTTCACGGGT-TTGC-T-TGAT-ACGTAAGCTTTAT  
AGTAGAATTTT-ATTTT-A-TTATTAAGTTA-CTGAGGAATTTCCAACCTGC-CCA--TG  
GTTGTCAGCAATGGCTT--CC-AATA--GGGTGATCTACTGTGAGAAAA-TTGTAGTGTT  
CAAAGCA--GG-C---GTC---TTTCGTTTGTTC AATGCAGCATGGTATAGTTAAATATG  
ACAC---TAAATATAT-GTTGGTTG-TATA---TTCT-TAGTGTAATGACTAATAGGGAA

GGGCGGGGCCGTTTCATATTGATGGGCGAGAGGTGAAATTCGTTGACCCTATCAAGATGCA  
CTACAGCGAAAGCATTTCGGCAAGTACTTCTCCATTAATCAAGAACGAAAGTTTGGGGATC  
GAAGACGATCAGATACCGTCGTAGTCCAAACCATAAACTATGTCGACCAGGGATTGGACG  
GATAAT-TTTTTAAAAACTCGCTCAGAACCTT-GTGAGAAATCAT-GAGTGTGGACTC  
TGGGGGGAGTATGGTCGCAAGTCTGAACTTAAAGGAATTGACGGAAGGGCACACAATGG  
AGTGGA-CCTGCGGCTTAATTT-GACTCAACTCGGGAAA-ACTTACCAAGCTCAGATAT  
AATAAGGATTGACAGA-CTAA-AAGATCTTTCATGATTGTATAAGTGGTGGTGCATGGTC  
GTTCTTAG-TTGGTGGAGTGATTTGTCTGGTCAATTCCGATAACGGACGAGACCTCTACT  
TACTAAGTATGATATTTATTTGGCCAATATGGGAGATAGTCATT-TGGTGTGGTAGT-  
AGGA--CGTCAAAA-TCTTA----CTATTCTTCATTGAG-TGGTGTGATTTCTGGTCAGA  
TAG--GTACTAATTTTTAAAAATA---AA-CTTCTTAGAAGGACTACCT-ACCTCAAGTGG  
GGGG-AAGTCGGAGGCAATAACAGGTCTGTGATGCCCTTAGATACCTT-GGGCTGCACGG  
GCGTTACAATGTAGGCGAGAAAAAGGT---TTCC-----GGAATCGA-AAG---GT  
TTC-GGTAATCAATTGAATTCCTACGTAATGGGGATTA-ATTTTTGTAATTATCGATTA  
TCAACGAGGAATTCCTGTAAAGCTAAATCATTACTTTACGCTGAATATGTCCTGCCCT  
TTGTACACACCGCCCGTCTCTACCGATCGAACGATTAGGTAAAACACTGACGGACTA--  
--GGC-GAC-----

>HQ141499.1\_Heterostelium\_boreale\_BSB10A

TCTAAG-TATAAACCTTTA-TACGGTGAAC----CTGCAGAAGGATCAACT-ACAA--CT  
-ATGT---GATAAACTA-AAGAACCTTCGC-GCTTC-----GGCGTCTT-GGATAACCG  
CAGTAAATCGGGGCTAATACATATAAA-CG-AAAGGATGAACGGG----CAACTGTG-AG  
TCTTTGCGATTGTT---A-GTT-TTCTTA---CA--CCAACCTTTCGGAGTTTGTGGT  
GAGTCCGAACAATATTGCTGATCG-AA-----ACT-TAGTTTCGACGAGTCTTTGT  
GTCACTGCCCTATCAACTTTCGATGGTAAGGTATTGGCTTACCATGGTTGTAACGGGTGA  
CGGGGAATCAGGGTTCGATTCCGGAGAGGGAGCCTGAGAAATGGCTACCACTTCTACGGA  
AAGCAGCAGGCGCGCAATTT-ACTCAATCCCAATAC-GGGGAAGTAGTGACAAAAAATAC  
TTAGTCCCTTCCATTTT-TATGGGGG--GCAATTGGAATAAGTACAACCTTAAATCGCTTAG  
CA-AAAGTGATTGGAGGGCAAGTCTGGTGCCAGCAGCCGCGGTAATTCCAGCTCCAA-TA  
GCGTATACTAAATTTGTTGACGTTAAAA-AGC-TCGTAGTTGAGATTGAGATTCTTA-G  
GT-TTAAAGCTTCTATTTTTAGCTT--CGGTAAATTTTAGTTGT-GTATAAAGCTTTTT  
AGTAGACTTTT--GTTT-G-CTATTAAGTTA-CTAAGAAATTTCTTCTGC-CCA--TG  
ATTTAGGTTCCGCCCCTGAATC-AATC--GGGTGTTCTACTGTGAGAAAA-TTGTAGTGT  
TAAAGCA--GG-C---GTA---TT-AGTTTGTCAATGCAGCATGGTATAGTAAAACAAG  
ACAC---TAAACATTT-GTTGGTT--AATG---TTCTATAGTGAATGACTAATAGGGAA  
GGGCGGGGCCCTCATATTGATGGGCGAGAGGTGAAATTCGTTGACCCTATCAAGATGCA  
CTACAGCGAAAGCATTTCGGCAAGTACTTCTCCATTAATCAAGAACGAAAGTTTGGGGATC  
GAAGACGATCAGATACCGTCGTAGTCCAAACCATAAACTATGTCGACCAGGGACTGGACG  
GTTAAT-TTTATAAAAACTCATTAGAACCTT-GTGGGAAACCAT-GAGTGTGGACTC  
TGGGGGGAGTATGGTCGCAAGTCTGAACTTAAAGGAATTGACGGAAGGGCACACAATGG  
AGTGGA-CCTGCGGCTTAATTT-GACTCAACTCGGGAAA-ACTTACCAAGCTCAGATAT  
AATAAGGATTGACAGA-CTAA-AAGATCTTTCATGATTGTATAAGTGGTGGTGCATGGTC  
GTTCTTAG-TTGGTGGAGTGATTTGTCTGGTCAATTCCGATAACGGACGAGACCTTACC  
TACTAAGTATGGTACTTATTTGGTCAATATGGGAGATAGTTAGT-TGGTGTGGTAGTT  
AGAT---TTC---G-TTTA---ATTATCTTTCATTGATCTAGTGTGATCCTGGTCGGA  
TAA--GTACTAACTAAAAAATA---AACTTCTTAGAGGGACTACCT-ACCTCAAGTGG  
GGGG-AAGTCGGAGGCAATAACAGGTCTGTGATGCCCTTAGATACCTT-GGGCTGCACGG  
GCGTTACAATGTAAGTTGGAATAAGGT---TTCC-----GGTATCGA-AAG---GT  
ATC-GGTAATCATTTGTAATAGCTTACGTAATGGGGATTA-ATCTTTGTAATTATCGGTTA  
TCAACGAGGAATTCCTGTAAAGCGTAAATCATTACTTTACGCTGAATATGTCCTGCCCT  
TTGTACACACCGCCCGTCTCTACCGATCGAACGATTAGGTAAAACACTGACGGACTA--  
--TGT-GATTTT-----A-----GGT-GAACC--TG  
-CA-GAAGGAT--C---A-----

>HQ141497.1\_Heterostelium\_oculare\_oculare

TCTAAG-TATAAACCTTTA-TACGGTGAAC----CTGCAGAAGGATCAACTCACAG--TT  
--TGT---GATAAACTA-AAGAACCTTCGC-GCTTA-----GGCGTCTT-GGATAACCG  
CAGTAAATCGGGGCTAATACATATAAA-CG-AAAGGATGAGCGGG----TAACCGCG-AG  
TCTTTGCGATTGTT---A-GTTTGTCTTT-TCATACCAACCTCCTCGGAGTTTGTGTT  
GAATCCGAACAATATTGCTGATCGGAA-----ACT-TGTTTCCGACGAGTTCTATGT  
GTCACTGCCCTATCAACTTTCGATGGTAAGGTATTGGCTTACCATGGTTGTAACGGGTGA  
CGGGGAATCAGGGTTCGATTCCGGAGAGGGAGCCTGAGAAATGGCTACCACTTCTACGGA  
AGGCGCAGGCGCGCAAAAT-ACTCAATCCCAATAC-GGGGAAGTAGTGACAAAAAATAC  
TAATGCCCTTCCATTTTATGGGGG--GCAATTGGAATAAGTACAACCTTAAATCGCTTAG  
CA-AAAGTGATTGGAGGGCAAGTCTGGTGCCAGCAGCCGCGGTAATTCCAGCTCCAA-TA  
GCGTATACTAAATTTGTTGACGTTAAAA-AGC-TCGTAGTTTAGATTGAGATTTTTT-G  
GT-TTAAAGC--TCATTTTTGCTTAAACGGTAATTAGGTGTAGT-GTATAAAGCTTTTA  
TGTAGACTTCGC-GTTT-A-TATAAAAGTTA-CCAAAAAATTTCTTCTGC-CCA--T-  
--ACTAAAATTTATTTA-GT-AATC--GGGTGTTCTACTGTGAGAAAA-TTGTAGTGT  
TAAAGCA--GG-C---GTC---TT-TGTTTGTCAATGCAGCATGGTATAGTAAAAAAG  
ACAC---TAAACATTT-GTTGGTT--AATG---TT-A-TAGTGAATGACTAATAGGGAA  
GGGCGGGGCCGTTCAATTTGCTTAAAGGCGAGAGGTGAAATTCGTTGACCCTATCAAGATGCA  
CTACAGCGAAAGCATTTCGGCAAGTACTTCTCCATTAATCAAGAACGAAAGTTTGGGGATC  
GAAGACGATCAGATACCGTCGTAGTCCAAACCATAAACTATGTCGACCAGGGACTGGACG

GTAAAT-TTTATAAAAACTCGCTCAGAACCTT-GTGGGAAACCAT-GAGTGTGGACTC  
TGGGGGAGTATGGTCGCAAGTCTGAAACTTAAAGGAATTGACGGAAGGGCACACAATGG  
AGTGGAA-CCTGCGGCTTAATTT-GACTCAACTCGGGAAA-ACTTACCAAGCTCAGATAT  
AATAAGGATTGACAGA-CTAA-AAGATCTTTCATGATTGTATAAGTGGTGGTGCATGGTC  
GTTCTTAG-TTGGTGGAGTGATTGTCTGGTCAATTCCGATAACGGACGAGACCTTACC  
TACTAAGTGGTACTTATTTAGTCAATATGGGGGATAGCTAGT-TGGTGTGGTAATT  
AGTC---TTC-ACG-GATTA---ATTATCTTTCATTGATCTAGTGTGACTCTGATTAGA  
TAA--GTACTAACTAAAAAATA---AAACTTCTTAGAGGGACTACCT-ACCTCAAGTGG  
GGGG-AAGTCGGAGGCAATAACAGGTCTGTGATGCCCTTAGATACCTT-GGGCTGCACGC  
GCGTTACAATGTAAGTGAGAAAAAGGT----TTCC-----GGTATCGA-AAG---GT  
ATC-GGTAATCATTGAATTACCTACGTAATGGGGATTG-ATCTTTGTAATTATCGATCA  
TCAACGAGGAATTCCTTGTAAGCGTAAATCATTACTTTACGCTGAATATGTCCCTGCCCT  
TTGTACACACCGCCGTCGCTCCTACCGATCGAACGCTTAGGTAAAACCTGACGGACTA--  
--TAT-GATATT-----AACGC-TGG---TTGATACTCTGTCCGATGTAGATACGATA  
TGT-CTTGTCT-CC----AAA--GATT

>AM168079.1 *Heterostelium oculare*\_DB4B

TCTAAG-TATAAACCTTTA-TACGGTGAAA----CTGCAGACGGCTCATT--ACAA--CA  
---GT---GATAAACTA-AAGAACTTTCGC-GCTTA-----GGCGTCTT-GGATAACCG  
CAGTAAATCGGGGCTAATACATATAAA-CG-AAAGGATGAGCGGG---TAACCGCG-AG  
TCTTTGCGATTGTT---A-GITTTGCTTTT-TCATACCAACCTCCTCGGAGTTTGTGT  
GAATCCGAACAATATTGCTGATCGGAA-----ACT-TGTTCCGACGAGTCTATGT  
GTCACCTGCCCTTCAACTTTCGATGGTAAGGTATTGGCTTACCATGGTTGTAACGGGTGA  
CGGGGAATCAGGGTTCGATTCCGGAGAGGGAGCCTGAGAAATGGCTACCATTCTACGGA  
AGGCAGCAGGCGCGCAAATT-ACTCAATCCCAATAC-GGGGAAGTAGTGACAAAAAATAC  
TAATGCCCTTCCATTTTATGGGGG--GCAATTGGAATAAGTACAACCTTAAATCGCTTAG  
CA-AAAGTGATTGGAGGGCAAGTCTGGTGCCAGCAGCCGCGGTAATTCCAGCTCCAA-TA  
GCGTATACTAAATTTGTTGCGTAAAA-AGC-TCGTAGTTTAGATTGAGATTTTTTG-G  
GT-TTAAAGC--TCATCTTTTTCGTTAAACGGTAATTAGGTGTAGT-GTATAAAGCTTTTA  
TGTAAGTCTCGC-GTTT-A-TATATAAAGTAA-CCAAAAAATTTTATTCTGC-CCA--T-  
--ACTAAAATTTATTTA-GT-AATC--GGGTGTTCTACTGTGAGAAAA-TTGTAGTGT  
TAAAGCA--GG-C---GTC---TT-TGTTTGTCAATGCAGCATGGTATAGTAAAAAAG  
ACAC---TAAACATTT-GTTGGTT--AATG---TT-A-TAGTGAATGACTAATAGGGAA  
GGCGGGGCGTTCATATTGATGGGCGAGAGGTGAAATTCGTTGACCCTATCAAGATGCA  
CTACAGCGAAAGCATTTCGGCAAGTACTTCTCCATTAATCAAGAACGAAAGTTTGGGGATC  
GAAAGCAGATCAGATACCGTCTAGTCCAAACCATAAACTATGTGACCAGGGACTGGACG  
GTTAAT-TTTATAAAAACTCGCTCAGAACCTT-GTGGGAAACCAT-GAGTGTGGACTC  
TGGGGGAGTATGGTCGCAAGTCTGAAACTTAAAGGAATTGACGGAAGGGCACACAATGG  
AGTGGAA-CCTGCGGCTTAATTT-GACTCAACTCGGGAAA-ACTTACCAAGCTCAGATAT  
AATAAGGATTGACAGA-CTAA-AAGATCTTTCATGATTGTATAAGTGGTGGTGCATGGTC  
GTTCTTAG-TTGGTGGAGTGATTGTCTGGTCAATTCCGATAACGGACGAGACCTTACC  
TACTAAGTGGTACTTATTTAGTCAATATGGGGGATAGCTAGT-TGGTGTGGTAATT  
AGTC---TTC-ACG-GATTA---ATTATCTTTCATTGATCTAGTGTGACTCTGATTAGA  
TAA--GTACTAACTAAAAAATA---AAACTTCTTAGAGGGACTACCT-ACCTCAAGTGG  
GGGG-AAGTCGGAGGCAATAACAGGTCTGTGATGCCCTTAGATACCTT-GGGCTGCACGC  
GCGTTACAATGTAAGTGAGAAAAAGGT----TTCC-----GGTATCGA-AAG---GT  
ATC-GGTAATCATTGAATTACCTACGTAATGGGGATTG-ATCTTTGTAATTATCGATCA  
TCAACGAGGAATTCCTTGTAAGCGTAAATCATTACTTTACGCTGAATATGTCCCTGCCCT  
TTGTACACACCGCCGTCGCTCCTACCGATCGAACGCTTAGGTAAAACCTGACGGACTA--  
--TAT-GATATT--AT--AGC-A-ATATGATACTG-----CTG-TGG-GAAG--TTA  
-GT-TAAATCT--C----ATT-GTTT

>AM168077.1 *Speleostelium caveatum*\_WS695

TCTAAG-TATAAATCTTTA-TACGGTGAAA----CTGCAGACGGCTCATT--ACAA--TA  
---GT---GATAAACTA-ATAGATTTTCGG-GTTA-----CCTTTT-GGATAACCG  
CAGTAAATCGGGGCTAATACATAGAAG-CG-AGGGG-TGACTGGC-----AAC-G-G-AA  
GCTCCGCGATTATT---A-GTT-TAT--TA-CCAATCC---CGCAA-GGGCTAG-TGGT  
GAAACCGAATAATATTGCTGATCGACA-----TGT-ATTTGTCGACAAATCTACTGT  
GTCACCTACCCTTCAACTTTCGATGGTACGGTATTGGCCTACCATGGTTGTAACGGGTAA  
CGGGGAATCAGGATTTCGATTCCGGAGAGGGAGCCTGAGAAATGGCTACCATTCTACGGA  
AGGCAGCAGGCGCGCAAATT-ACTCAATCCCAATAC-GGGGAAGTAGCGACAATAAATAT  
TAATGCCCATCTATTT-TATAGAGG--GCAATTAATAATGGACAAAATATAAACTACATAG  
TT-AATAACAATTGGAGGGCAAGTCTGGTGCCAGCAGCCGCGGTAATTCCAGCTCCAA-TA  
GCATATACTAAAGTTGTTGCGTAAAA-AGC-TCGTAGTTGAAATTTGGGCTATTAA-G  
GG-CTCA-----AACCAACATCCACTTTATAG-----TGTTTGA-----T  
GGTTCC-TTATA-G--ACT-CAACT--TGA---CTCAGTATAGTCTACTTTT----GTA  
GTTCTG--TATCTG-----AGTACTTCACTGTGAGAAAA-TTGTGGTGT  
TAAAGCA--AG-C---GTA---TC-GCTTGTCTTTTCAGCATGGTATGATAAAAACATG  
ATCT--GCGTCAAC--CATTGGTAG--TTG----ACTGTA-TGTAATGATTAATAGGGGA  
GGATGGGGATGTTCAATTGATGGGCGAGAGGTGAAATTCGTTGACCCTATCAAGATGAA  
CTTCTGCGAAAGCATTATCAAACTCCCCATTAATCAAGAACGAAAGTTTGGGGATC  
AAAGACGTTTCAATACCGTCTGATCCAACTATAAACGATGTGACCAGGGATCAGCCG  
AT--A--TTTATAAAAACTCGGTTGGCAACTT-GTGGGAAACCAT-GAGTTTTTAGACTC  
TGGGGGAAGTATGGTCGCAAGTCTGAAACTTAAAGGAATTGACGGAAGGGCACACAATGG  
AGTGGAG-CCTGCGGCTTAATTT-GACTCAACTCGGGAAA-ACTTACCAAGCTAAGATAT

AGTTAGGATTGACAGA-CTAA-AAGATCTTTCATGATTCTATAAGTGGTGGTGCATGGTC  
GTTCTTAG-TTGGTGGAGCAATCTGTCTGGTCAATCCGATAACGGACGAGATCTCGACC  
TGCTAACTAGTATCACTTATCA-ACCAATATAGTCGGTACCTTTTCTATGCTG--ACTT  
TGTTT-CTC-AGGGTG-----AC-GG-GTGGGTTAG---AATATTGGCTGGTTAGA  
TAA--GTGAGATAAA----ATTA---AAACTTCTTAGAGGGACTACCTTGCGGTAAGCAG  
GTGG-AAGTTCGAGGCAATAACAGGTCTGTGATGCCCTTAGATA-----

>AM168073.1 Tieghemostelium menorah M1

TCTAAG-TATAAATCTTTA-TACGGTGAAA---CTGCAGACGGCTCATT--ACAA--CA  
---GT---GATAAACTA-ATAGAGTTTCGG-GTCTAA---C--CTACCT-GGATATCCG  
CAGTAAATCGGGGCTAATACATACAAA-CG-AGGGG-TGACTGTT-----TAC-G-G-AA  
GCTCCGCGATTATT---A-GAT-T---AA-CCAATGC--CCGAAGGGTTTTG-TGGT  
GAAACCGAATAATATTGCAGATCGAAG-----CCT--AGCTTCGACAATTCTATTGT  
GTCCTGCCCTATCAACTTTCGATGGTACGGTATTGGCCTACCATGGTTTTACGGGTAA  
CGGAGAATTAGGGTTCGATCCGAGAGGGCGCCTGAGAAATGGCGACCACTTCTATGGA  
AGGCAGCAGGCGCGCAAATT-ACTCAATCCCAATAC-GGGGAAGTAGTGACAATAAATAT  
TGATGCCTATTTCGTTT-TTCGAAAAG--GTAATTGAAATGAGTACAAAATAAATCTCTAA  
CT-AATACAATTGGAGGGCAAGTCTGGTCCAGCAGCCGCGGTAATCCAGCTCCAA-TA  
GCATATACTAAAGTTGTTGCGGTTAAAA-AGC-TCGTAGTTGAAAATAAATTTACATT-G  
GG-TTAA-----AGTCCACGTCCGCTTTGG-----TGGTCGCT----G  
GTCTCCATTGTATCTTTTT-AAACT--TCACC-CTAAGGCCT-CTACTTT-----GTA  
GC--GGGTTCTTTTTA-----GGGTACTTCACTGTGAGAAAA-TTGTGGTGT  
CAAAGCG--GG-C---GTC---T-CGCCTGATCTTTTGCAGCATGGTATGATGGAACAAG  
ACAT---TTTGTGT--AATTGGTT--GCA---TTTAAAGTGAATGATTAATAGGGGT  
GGATGGGGGTGTTCAATTGGTGGCGAGAGGTGAAATTCGCTGACCCTATCAAGATGAA  
CTTCTGCGAAAGCATTACCAATACTCCCCATTAATCAAGAACGAAAGTTTTGGGGATC  
AAAGACGATCAGATACCGTCTAGTCCAAACTATAAACTATGTCGACCAGGGATCGGGTA  
CT--AT-TTTTTAAAAATTTGATCGGCACCTT-GTGAGAAATCAT-GAGTGTTAGATTTC  
TGGGGGGAGTATGGTGCAGAGTCTGAACTTAAAGGAATTGACGGAAGGGCACACAATGG  
AGTGGAG-CCTGCGGCTAATTT-GACTCAACTCGGGAAA-ACTTACCAAGCTAAGATAT  
AGTAAGGATTGACAGA-CTAA-AAGATTTTTCATGATTCTATAAGTGGTGGTGCATGGTC  
GTTCTTAG-TTGGTGGAGCAATCTGTCTGGTCAATTCGATAACGGACGAGATCTCGACC  
TGCTAACTAGTAGTACCTATTAATTCGATATGAATGAAAGCTCATTCCGAGTAAGTTAGT  
CAT---CGCAAGG-TGT----CTGACACTTCGGTGGG---TCGGTAATTTGATTGA  
TAG--GTACGATAT---ATAA-----CTTCTTAGAGGGACTACCT-GTGGCAAAACAG  
GGG-AAGTTCGAGGCAATAACAGGTCTGTGATGCCCTTAGATACCTT-GGGCCGACCG  
GCGCTACAATGTAATAGGCAAAAAGCT----AT----CC--TGGTCCGG-AAG---GA  
TT-GGTAATCATATGAATTTATTACGTAACCTGGGCTTG-ATCTTTGTAATTATTGATCA  
TCAACGAGGAATTCCTTGTAGCGCAAATCATTACTTTGTGCTGAATATGTCCTGCCCT  
TTGACACACCGCCGCTCGTCCACCGATCGAATGATACGGTAAAGCCAACGGATAA--  
-G----G--C---TCTGCAG-C-AAT-GCGT-----GAGTTTCA-AAAG--TTG  
-TT-TAAATCT--C---ATT--GTTT

>JF892725.1 Tieghemostelium unicornutum OH599

-----AGATAAACTA-ATAGAGTTTCGG-GTCTAA---C--CTTTAT-GGATATCCG  
CAGTAAATCGGGGCTAATACATACAAA-CG-AGGGG-TGACTGTT-----TAC-A-G-AA  
GCTTCGCGATTATT---A-GTC-T---AA-CCAATAC--CCGAAGGGTCTAG-TGGT  
GAAACCGAATAAATATTGCAGATCGAAA-----CCT--AGTTTCGACGATTCTATTGT  
GTAACCTGCCCTATCAACTTTCGATGGTACGGTATTGGCCTACCATGGTTGTAACGGGTAA  
CGGGGAATTAGGGTTCGATTCGGAGAGGGCGCCTGAGAAATGGCGACCACTTCTACGGA  
AGGCAGCAGGCGCGCAAATT-ACTCAATCCCAATAC-GGGGAAGTAGTGACAATAAATAT  
CAATGCCTATTTCGTTT-TTCGAAAAG--GTAATTGAAATGGGTACAAATTAACCCCTTAA  
CC-AATACAATTGGAGGGCAAGTCTGGTCCAGCAGCCGCGGTAATCCAGCTCCAA-TA  
GCATATACTAAAGTTGTTGCGGTTAAAA-AGC-TCGTAGTTGAACTAAATTTGTATT-G  
GG-CTCA-----AGCTTGTAGCCACTTTGG-----TGGTTATC-----A  
AGTTCCAGTGCATTTTTTT-GAAGC--G-GCC-CTTAAAGCCT-CTACCTC-----GTA  
GT--TGGTTTTCTT-----GGGTTTTCACTGTGAGAAAA-TTGTGGTGT  
CAAAGCG--GG-C---GTT---T-CGCCTGATCTTTTGCAGCATGGGATGATAAAACATG  
ACAT--TCAATGC--AATTGGTT--GCA---TCTG-AGTGAATGATTAATAGGGAT  
GGATGGGGGTGTTCAATTGGTGGCGAGAGGTGAAATTCGTTGACCCTATCAAGATGAA  
CTTCTGCGAAAGCATTACAAATACTTCCCAATTAATCAAGAACGAAAGTTTTGGGGATC  
AAAGACGATCAGATACCGTCTAGTCCAAACTATAAACTATGTCGACCAGGGATCGGGTA  
GC--AT-TTTTCAAAAATCTATTTGGCACCTT-GTGAGAAATCAT-GAGTGTTAGATTTC  
TGGGGGGAGTATGGTGCAGAGTCTGAACTTAAAGGAATTGACGGAAGGGCACACAATGG  
AGTGGAG-CCTGCGGCTAATTT-GACTCAACTCGGGAAA-ACTTACCAAGCTAAGATAT  
AGTAAGGATTGACAGA-CTAA-AAGATTTTTCATGATTCTATAAGTGGTGGTGCATGGTC  
GTTCTTAG-TTGGTGGAGCAATCTGTCTGGTCAATTCGATAACGGACGAGATCTCGACC  
TGCTAACTAGTAGTACGATTTGGTTCGATATGGGTGAAGGCTTTTTGGAGTAAGTTGTG

CGT---CGCAAGG-TGT----ACAGCACTTCTGGGGG---TTTGTAACTGGTCAGA  
TAC--GTACGATTAA--AAAA-----CTTCTTAGAGGGACTACCT-GTGGCAAACAG  
GGGG-AAGTTCGAGGCAATAACAGGTCTGTGATGCCCTTAGATACCTT-GGGCCGCACGC  
GCGCTACAATGTAAAAGGCAAAAAGCT----TT----CC--TGGTCCGG-AAG---GA  
CT-GGGTAATCATCTGAATTTTTTACGTAACCTGGGATTG-ATCTTTGTAATTATTGATCA  
TCAACGAGGAATTCCTGTAAAGCGCAAATCATTACTTTGTGCTGAATAGGTCCCTGCCCT  
TTGTACACACCGCCCGTCTTACCGATCGAATGATACGGTAAAGCCAACAGATA---  
-----C-----G---G

-----T-C-----

>AM168045.1\_Tieghemostelium\_lacteum

TCTAAG-TATAAATCTTTA-TACGGTGAAA---CTGCAGACGGCTCATT--ACAA--CA  
---GT---GATAAACTA-ATAGAGTTTCGG-GTCTAA---C--CTACCT-GGATATCCG  
CAGTAAATCGGGGCTAATACATACAAA-CG-AGGGG-TGACTGTT----TAC-G-G-GA  
GCTCCCGATTATT---A-GTC-T---AG-CCAATGC--CCGCAAGGGTTTTG-TGGT  
GAAACCGAATAAATTGCAGATCGAAA-----TCT--GATTTGACAATTCTATTGT  
GTCACCTGCCCTATCAACTTTCGATGGTACGGTATTGGCCTACCATGGTTGTAACGGGTAA  
CGGAGAATTAGGGTTCGATTCCGGAGAGGGCGCCTGAGAAATGGCGACCACTTCTACGGA  
AGGCAGCAGGCGCGCAAATT-ACTCAATCCCAATAC-GGGGAAGTAGTGACAATAAATAT  
TAATGCCTATTCGTTT-TTCGAAAG--GTAATTAATAATGGGTACAAATTAATCCATTAA  
CT-AATACAATGGGAGGCAAGTCTGGTGCCAGCAGCCGGTAAATCCAGCTCCAA-TA  
GCATATACTAAAGTTGTTGCGGTTAAAA-AGC-CCGTAGTTGAAATTAATTTGCATT-G  
GG-CCAA-----AGTTTCTAGCCACTTTGG-----TGGTTACG----A  
AATTCAGTGCATTTTTT-AAACC--T-ACC-CTTAAAGCCT-CTACTTT-----GTA  
GT--TGGTTTTCTT-----GGGTACTTCACTGTGAGAAAA-TTGTGGTGT  
TAAAGCG--GG-C---GTC---T-CGCCTGATCTTTTGCAGCATGGTATGATAAAACATG  
ACAT--TTTGTGC--AATTGGTT--GCA---TTTAAAGTGAATGATTAATAGGGAT  
GGATGGGGGTGTTCAATTTGGTGGGCGAGAGGTGAAATTCGTTGACCCTATCAAGATGAA  
CTTCTGCGAAAAGCATTCAATAACTTCCCAATTAATCAAGAACGAAAGTTTGGGGATC  
AAAGACGACCAGATACCGTCGTAGTCCAACTATAAACTATGTGACCAAGGGATCGGTTA  
AT--AT-TTTTTAAAAATTTACTCGGCACCTT-GTGAGAAATCAT-GAGTGTGTTAGATTC  
TGGGGGGAGTATGGTTCGCAAGTCTGAAACTTAAAGGAGTTGACGGAAGGGCACACAATGG  
AGTGGAG-CCTGCGGCTTAATTT-GACTCAACTCGGAAAA-ACTTACCAAGCTAAGATAT  
AGTAAGGATTGACAGA-CTAA-AAGATTTTTTCATGATTCTATAAGTGGTGGTGCATGGTC  
GTTCTTAG-TTGGTGGAGCAATCTGTCTGGTCAATTCTGATAACGGACGAGATCTCGACA  
CGCTAACTAGTAGTACTTATTCGGTTCGATATGAGTGAAGGCTCTCAAGGAGTAAGTTGTG  
CGT---CGAAAGG-TGT----ATGACACTTCGGGGGG---TTTGTAACTTGACCAGA  
TAT--GTACGATTTT---AAAA-----CTTCTTAGAGGGACTACCT-GTGGCAAACAG  
GGGG-AAGTTCGAGGCAATAACAGGTCTGTGATGCCCTTAGATACCTT-GGGCCGCACGC  
GCGCTACAATGTAAATAGGCAAAAAGCT----CT----CC--TGGTCCGG-AAG---GA  
TT-GGGTAATCATATGAATTTATTACGTAACCTGGGCTTG-ATCTTTGTAATTATTGATCA  
TCAACGAGGAATTCCTGTAAAGCGCAAATCATTACTTTGTGCTGAATATGTCCCTGCCCT  
TTGTACACACCGCCCGTCTTACCGATCGAATGATACGGTAAAGCCAACGGATAA--  
--GAT-----TCTGTAG-C-AAT-ACGT-----GAATTTTA-AAAG--TTG  
-TT-TAAATCT--C---ATT--GTTT

>JF892717.1\_Tieghemostelium\_montium\_57a

-----GATAAACTA-ATAGAGTTTCGG-GTCTAA---C--CTACAT-GGATATCCG  
CAGTAAATCGGGGCTAATACATACAAA-CG-AGGGG-TGACTGTT----TAC-G-G-AA  
GCTCCCGATTATT---A-GTC-T---AG-CCAATAC--CCGCAAGGGTTTTG-TGGT  
GAAACCGAATAAATTGCAGATCGAAA-----TCT--GATTTGACAATTCTATTGT  
GTCACCTGCCCTATCAACTTTCGATGGTACGGTATTGGCCTACCATGGTTGTAACGGGTAA  
CGGAGAATTAGGGTTCGATTCCGGAGAGGGCGCCTGAGAAATGGCGACCACTTCTACGGA  
AGGCAGCAGGCGCGCAAATT-ACTCAATCCCAATAC-GGGGAAGTAGTGACAATAAATAT  
TAATGCCTATTCGTTT-TTCGAAAG--GTAATTAATAATGGGTACAAATTAATCCATTAA  
CT-AATACAATTGGAGGGCAAGTCTGGTGCCAGCAGCCGGTAAATCCAGCTCCAA-TA  
GCATATACTAAAGTTGTTGCGGTTAAAA-AGC-TCGTAGTTGAACTAAATTTGCATT-G  
GG-TCAA-----AGTTTCTAGCCACTTTGG-----TGGTTACG----A  
AATTCAGTGCATTTTTT-AAATC--T-GCC-CTTAAAGCCT-CTACTTT-----GTA  
GT--TGGTTTTCTT-----GGGTACTTCACTGTGAGAAAA-TTGTGGTGT  
TAAAGCG--GG-C---GTC---T-CGCCTGATCTTTTGCAGCATGGTATGATAAAACATG  
ACAT--TTTGTGC--AATTGGTT--GCA---TTTAAAGTGAATGATTAATAGGGAT  
GGATGGGGGTGTTCAATTTGGTGGGCGAGAGGTGAAATTCGTTGACCCTATCAAGATGAA  
CTTCTGCGAAAAGCATTCAATAACTTCCCAATTAATCAAGAACGAAAGTTTGGGGATC  
AAAGACGATCAGATACCGTCGTAGTCCAACTATAAACTATGTGACCAAGGGATCGGTTA  
AT--AT-TTTTTAAAAATTTACTCGGCACCTT-GTGAGAAATCAT-GAGTGTGTTAGATTC  
TGGGGGGAGTATGGTTCGCAAGTCTGAAACTTAAAGGAATTGACGGAAGGGCACACAATGG  
AGTGGAG-CCTGCGGCTTAATTT-GACTCAACTCGGAAAA-ACTTACCAAGCTAAGATAT  
AGTAAGGATTGACAGA-CTAA-AAGATTTTTTCATGATTCTATAAGTGGTGGTGCATGGTC  
GTTCTTAG-TTGGTGGAGCAATCTGTCTGGTCAATTCGATAACGGACGAGATCTCGACC  
TGCTAACTAGTAGTACTTATTCGGTTCGATATGAGTGAAGGCTCTCAGGGAGTAAGTTGTG  
CGT---CGAAAGG-TGT----ATGACACTTCGGGGGG---TTTGTAACTTGACCAGA  
TAT--GTACGATTTT---AAAA-----CTTCTTAGAGGGACTACCT-GTGGCAAACAG  
GGGG-AAGTTCGAGGCAATAACAGGTCTGTGATGCCCTTAGATACCTT-GGGCCGCACGC

GCGCTACAATGTAATAGGCCAAAAAGCT----CT----CC--TGGTCCGG-AAG---GA  
TT-GGGTAATCATATGAATTTATTACGTAACCTGGGCTTG-ATCTTTGTAATTATTGATCA  
TCAACGAGGAATTCCTTGTAAGCGCAAATCATTACTTTGCGCTGAATATGTCCTGCCCT  
TTGTACACACCGCCCGTCTCTACCGATCGAATGATACGGTAAAGCCAACGGATAA--  
-GAT-----C-----TGGT-----GAAC-CTG-C--G--TTG

-TC-C---G---G---ACC---CGT

>JF892716.1\_Tieghemostelium\_angelicum\_38B0

TCTAAG-TATAAATTTTTA-TACGGTGAAC----CTGCAGACGGATCAACTCACGAG-CA  
--TGT---AGATAAACTA-ATAGAGTTTCGG-GTCTAA---C--CTACAT-GGATATCCG  
CAGTAAATCGGGGCTAATACATACAAA-CG-AGGGG-TGACTGTT----TAC-G-G-AA  
GCTCCGCGATTATT---A-GTC-T---AG-CCAATAC--CCGCAAGGGTTTTG-TGGT  
GAAACCGAATAATATTGCAGATCGAAA-----TCT--GATTTGACAATTCTATTGT  
GTCACTGCCCTATCAACTTTCGATGGTACGGTATTGGCCTACCATGGTTGTAACGGGTAA  
CGGAGAATTAGGGTTCGATTCCGGAGAGGGCGCCTGAGAAATGGCGACCATTCTACGGA  
AGGCAGAGGCGCGCAAATT-ACTCAATCCCAATAC-GGGGAAGTAGTGACAATAAATAT  
TAATGCCTATTTCGTTT-TTCGAAAAG--GTAATTAATAATGGGTACAAATTAATCCATTAA  
CT-AATACAATTGGAGGGCAAGTCTGGTGCCAGCAGCCGCGGTAATTCCAGCTCCAA-TA  
GCATATACTAAAGTTGTTGCGGTTAAAA-AGC-TCGTAGTTGAAACTAAATTTGCATT-G  
GG-TCAA-----AGTTTCTAGCCACTTTGG-----TGGTTACG----A  
AATTCAGTGCATTTTTTT-AAATC--T-GCC-CTTAAAGCCT-CTACTTT-----GTA  
GT--TGGTTTTCTT-----GGGTACTTCACTGTGAGAAAA-TTGTGGTGT  
TAAAGCG--GG-C---GTC---T-CGCCGTGATCTTTGCAGCATGGTATGATAAAACATG  
ACAT---TTTGTGC--AATTGGTT--GCA---TTTAAAGTGAATGATTAATAGGGAT  
GGATGGGGGTGTTTCATATTGGTGGGCGAGAGGTGAAATTCGTTGACCCTATCAAGATGAA  
CTTCTGCGAAAGCATTATCAAACTTCCCCATTAATCAAGAACGAAAGTTTGGGGATC  
AAAGACGATCAGATACCGTCTGATGCCAAACTATAAACTATGTGACACAGGGATCGGTTA  
AT--AT-TTTTTAAAAATTTACTCGGCACCTT-GTGAGAAATCAT-GAGTGTTTAGATTTC  
TGGGGGAGTATGGTTCGAAAGTCTGAACTTAAAGGAATTGACGGAAGGGCACACAATGG  
AGTGGAG-CCTGCGGCTTAATTT-GACTCAACTCGGAAAA-ACTTACCAAGCTAAGATAT  
AGTAAGGATTGACAGA-CTAA-AAGATTTTTCATGATTCTATAAGTGGTGGTGCATGGTC  
GTTCTTAG-TTGGTGGAGCAATCTGTCTGGTCAATTCCGATAACGGACGAGATCTCGACC  
TGCTAACTAGTAGTACTTATTCGGTTCGATATGAGTGAAGGCTCTCAGGGAGTAAGTTGTG  
CGT----CGAAAGG-TGT-----ATGACACTTCGGGGGG---TTTGTAACTTGACCAGA  
TAT--GTACGATTTT---AAAAA-----CTTCTTAGAGGGACTACCT-GTGGCAAACAG  
GGGG-AAGTTCGAGGCAATAACAGGTCTGTGATGCCCTTAGATACCTT-GGGCCGCACGC  
GCGCTACAATGTAATAGGCCAAAAAGCT----CT----CC--TGGTCCGG-AAG---GA  
TT-GGGTAATCATATGAATTTATTACGTAACCTGGGCTTG-ATCTTTGTAATTATTGATCA  
TCAACGAGGAATTCCTTGTAAGCGCAAATCATTACTTTGCGCTGAATATGTCCTGCCCT  
TTGTACACACCGCCCGTCTCTACCGATCGAATGATACGGTAAAGCCAACGGATAA--  
-GAT-----CT-TAA-C---C-TGGTT-----GATC-CTG-CCAG--TAG  
-TC-ATATGCT--T---GTC--TCAA

>JF892722.1\_Tieghemostelium\_dumosum\_OH602

-----ATAAACTA-ATAGAGTTTCGG-GTCTAA---C--CTAC-T-GGATATCCG  
CAGTAAATCGGGGCTAATACATACAAA-CG-AGGGG-TGACTGTT----TAC-G-G-GA  
GCTCCGCGATTATT---A-GTC-T---AG-CCAATAC--CCGCAAGGGTTTTG-TGGT  
GAAACCGAATAATATTGCAGATCGAAA-----TCT--AATTTGACAATTCTATTGT  
GTCACTGCCCTATCAACTTTCGATGGTACGGTATTGGCCTACCATGGTTGTAACGGGTAA  
CGGAGAATTAGGGTTCGATTCCGGAGAGGGCGCCTGAGAAATGGCGACCATTCTACGGA  
AGGCAGCAGGCGCGCAAATT-ACTCAATCCCAATAC-GGGGAAGTAGTGACAATAAATAT  
TAATGCCTATTTCGTTT-TTCGAAAAG--GTAATTAATAATGGGTACAAATTAATCCCTTAA  
CT-AATACAATTGGAGGGCAAGTCTGGTGCCAGCAGCCGCGGTAATTCCAGCTCCAA-TA  
GCATATACTAAAGTTGTTGCGGTTAAAA-AGC-TCGTAGTTGAAACTAAATTTGTATT-G  
GG-TCCA-----AGTTCCTAGCCACTTTGG-----TGGTTACG----G  
AATTCAGTGCATTTTTTT-AAACC--T-GCC-CTTAAAGCCT-CTACTTT-----GTA  
GT--TGGTTTTCTT-----G-GTACTTCACTGTGAGAAAA-TTGTGGTGT  
CAAAGCG--GG-C---GTC---T-CGCCGTGATCTTTGCAGCATGGTATGATAAAACATG  
ACAT---TTTGTGC--AATTGGTT--GCA---TTT-AAAGTGAATGATTAATAGGGAT  
GGATGGGGGTGTTTCATATTGGTGGGCGAGAGGTGAAATTCGTTGACCCTATCAAGATGAA  
CTTCTGCGAAAGCATTATCAAACTTCCCCATTAATCAAGAACGAAAGTTTGGGGATC  
AAAGACGATCAGATACCGTCTGATGCCAAACTATAAACTATGTGACACAGGGATCGGTTA  
AT--AT-TTTTTAAAAATTTACTCGGCACCTT-GTGAGAAATCAT-GAGTGTTTAGATTTC  
TGGGGGAGTATGGTTCGAAAGTCTGAACTTAAAGGAATTGACGGAAGGGCACACAATGG  
AGTGGAG-CCTGCGGCTTAATTT-GACTCAACTCGGAAAA-ACTTACCAAGCTAAGATAT  
AGTAAGGATTGACAGA-CTAA-AAGATTTTTCATGATTCTATAAGTGGTGGTGCATGGTC  
GTTCTTAG-TTGGTGGAGCAATCTGTGGTCAATCCGATAACGGACGAGATCTCGACC  
TGCTAACTAGTAGTACTTATTCGGTTCGATATGAGTGAAGGCTCTCAAGGAGTAAGTTGTG  
CGT----CGCAAGG-TGC-----ATGACACTTCGGGGGG---TTTGTAACTTGATCAGA  
TAT--GTACGATTTT---AAAAA-----CTTCTTAGAGGGACTACCT-GTGGCAAACAG  
GGGG-AAGTTCGAGGCAATAACAGGTCTGTGATGCCCTTAGATACCTT-GGGCCGCACGC  
GCGCTACAATGTAATAGGCCAAAAAGCT----CT----CC--TGGTCCGG-AAG---GA  
TT-GGGTAATCATATGAATTTATTACGTAACCTGGGCTTG-ATCTTTGTAATTATTGATCA  
TCAACGAGGAATTCCTTGTAAGCGCAAATCATTACTTTGCGCTGAATATGTCCTGCCCT



TTGTACACACCGCCGTCGCTCCTACCGATCGAATGATACGGTAAAGCCAACGGA-AA--  
-----C--C---TCTGTAA-C---C-TGGTT-----GATC-CTG-CCAG--TAG  
-TC-ATATGCT--T----GTC--TCAA  
>JF892720.1\_Tieghemostelium\_simplex\_OH598  
TCTAAG-TATAAATCTTTA-TACGGTGAAC---CTGCAGAAGGATCAAC--CCGG---  
-TT-T---AGATAAACTA-ATAGAGTTTCGG-GTCTAA---C--CTACCT-GGATATCCG  
CAGTAAATCGGGGCTAATACATACAAA-CG-AGGGG-TGACTGTT-----TAC-G-G-GA  
GCTCCGCGATTATT---A-GTC-T---AG-CCAATAC--CCGCAAGGGTTTTG-TGGT  
GAAACCGAATAATATGCAGATCGAAA-----TCT--AATTTTCGACAATTCTATTGT  
GTCACTGCCCTATCAACTTTTCGATGGTACGGTATTGGCCTACCATGGTTGTAACGGGTAA  
CGGAGAATTAGGGTTCGATTCCCGAGAGGGCGCCTGAGAAATGGCGACCACTTCTACGGA  
AGGCAGCAGGCGCGCAAATT-ACTCAATCCCAATAC-GGGGAAGTAGTGACAATAAATAT  
TAATGCCTATTCGTTT-TTCGAAA--GTAATTAATAATGGGTACAAATTAATCCCTTAA  
CT-AATACAATTGGAGGGCAAGTCTGGTGCAGCAGCCGCGGTAATTCAGCTCCAA-TA  
GCATATACTAAAGTTGTTGCGGTTAAAA-AGC-TCGTAGTTGAACTAAATTTGTATT-G  
GG-TCCA-----AGTTCCTAGCCACTTTGG-----TGGTTACG-----A  
A-TTCCAGTGCATTTTTTT-AAACC--T-GCC-CTTAAAGCCT-CTACTTT-----GTA  
GT--T-GTTTTCTT-----GGGACTTCACTGTGAGAAAA-TTGTGGTGT  
CAAAGCG--GG-C---GTC--T-CGCCTGATCTTTGCAGCATGGTATGATAAAAACATG  
ACAT---TTTGTGC--AATTGGT---GCA---TTT-AAAGTGAATGATTAATAGGGAT  
GGATGGGGGTGTTCAATTGGTGGGCGAGAGGTGAAATTCGTTGACCCTATCAAGATGAA  
CTTCTGCGAAAGCATTCACTCAAACTTCCCATTAATCAAGAACGAAAGTTTGGGGATC  
AAAGACGATCAGATACCGTCTGATGCCAAACTATAAACTATGTCGACCAGGGATCGGTTA  
AT--AT-TTTTTAAAAAATTTACTCGGCACCTT-GTGAGAAATCAT-GAGTGTTTAGATTC  
TGGGGGGAGTATGGTGCAGAGTCTGAACTTAAAGGAATTGACGGAAGGGCACACAATGG  
AGTGGAG-CCTGCGGCTAATTT-GACTCAACTCGGGAAA-ACTTACCAAGCTAAGATAT  
AGTAAGGATTGACAGA-CTAA-AAGATTTTTCATGATTTCTATAAGTGGTGGTGCATGGTC  
GTTCTTAG-TTGGTGGAGCAATCTGTCTGGTCAATTCCGATAACGGACGAGATCTCGACC  
TGCTAACTAGTAGTACTTATTCGGTTCGATATGAGTGAAGGCTCTCAAGGAGTAAGTTGTG  
CGT---CGCAAGG-TGC-----ATGACTTTCGGGGG---TTTGTAACTTGATCAGA  
TAT--GTACGATTTT---AAAAA-----CTTCTTAGAGGGACTACCT-GTGGCAAACAG  
GGG-AAGTTCGAGGCAATAACAGGTCTGTGATGCCCTTAGATACCTT-GGGCCGCACGC  
GCGCTACAATGTAATAGGCAAAAAGCT----CT----CC--TGGTCCGG-AAG---GA  
TT-GGGTAATCATATGAATTTATTACGTAACCTGGGCTTG-ATCTTTGTAATTATTGATCA  
TCAACGAGGAATTCCTTGTAAAGCGCAAATCATTACTTTGCGCTGAATATGTCCTGCCCT  
TTGTACACACCGCCGTCGCTCCTACCGATCGAATGATACGGTAAAGCCAACGTG-AA--  
---T---CAA---GATCTAA-C---C-TGGTT-----GATC-CTG-CCAG--TAG  
-TC-ATATGCT--T---GTC--TCAA  
>AM168036.1\_Hagiwaraea\_coeruleostipes\_CRLC53B  
TCTAAG-TATAAATTTTTT-TATGATGAAA---CTGCAGAAGGCTCATT--ACAA--CA  
---GT---GATAAACTA-CTAGACTTTCGG-GCCTC-----GGCCTTTT-GGATAACCG  
CAGTAAATCGGGGCTAATACATACAAT-CG-ATGGG-TGACTGTT-----TAC-G-G-AA  
TCTCAGCGATTATT---A-GCT-TTC--AG-CCAACAC--TCTTCGGAGTTTTG--GGT  
GAACCCGGATAATATGCAGATCGAAG-----CTTACGCTTTCGACAAGTCTAATGT  
GACTAGCCCTAACAATTTTCGATGGTACGGTATTGGCCTACCATGGTTGTAACGGGTAA  
CGGGGAATTAGGGTTCGATTCCGGAGAGGGCGCCTGAGAAATGGCGACCACTTCTACGGA  
AGGCAGCAGGCGCGCAAATT-ACTCAATCCCAATAC-GGGGAAGTAGTGACAAGAAATAT  
TAATGCCTATCCTTTC-A-AGGAAG--GTAATTAATAATGGATTTAACTAAACCCATTTT  
TT-AATACAATTGGAGGCAAGTCTGGTGCAGCAGCCGCGTAATTGTCAGTCCAA-TA  
GCATATACTAAATTTGTTGCGGTTAAAA-AGC-TCGTAGTTGAAATGAAATTATATT-G  
GG-TTCA-----TAGGTTTTAGTCGACTTCGCGTC-----GGTTAA-----A  
ACTTCCAGTGTAAATTTTT-AACTT--TAATC-CAGGTTGCTAGTTACTTT-----GTA  
AT--TAGTTTTCTTT-----GGATACTTCACTGTGAGGAAA-TTGTGGTGT  
TAAAGCA--GG-C---GTT---TTCGCTTGATCTTTTGCAGCATGGTATGATAGAATAG  
ACAT---TTTATGT--AGTTGGCT--CGCA-----TAAAGTGAATGATTAATAGGGAT  
GGATGGGGGTGTTCAATTGATGGGCGAGAGGTGAAATTCGTTGACCCTATCAAGATGAA  
CTTCTGCGAAAGCATTACCAAACTTCTCCATTAATCAAGAACGAAAGTTTGGGGATC  
AAAGACGATCAGATACCGTCTGATGCCAAACTATAAACTATGTCGACCAGGGATCAGTTA  
CT--AT-TTTTTAAAAAATAAATGGCACCTT-GTGAGAAATCAT-GAGTGTTTAGATTC  
TGGGGGGAGTATGGTGCAGAGTCTGAACTTAAAGGAATTGACGGAAGGGCACACAATGG  
AGTGGAG-CCTGCGGCTAATTT-GACTCAACTCGGGAAA-ACTTACCAAGCTAAGATAT  
AATAAGGATTGACAGA-CTAA-AAGATCTTTCATGATTTCTATAAGTGGTGGTGCATGGTC  
GTTCTTAG-TTGGTGGAGCAATCTGTCTGGTCAATTCCGATAACGGACGAGATCTCGACC  
TGCTAACTAGTAGTACATATTGATTCGATATGCAAGAAAGATTGTTGGAGCAAGTTAAA  
GAT---CGAAAGG-TTT-----TTAGCTCTTCGCTGGT---TGAGTATTGTGGATTGA  
TATA-GTGCATAAATTTAAAAA---AACTTCTAGAGGACTACCT-GTGGCAAACAG  
GGGG-AAGTTCGAGGCAATAACAGGTCTGTGATGCCCTTAGATACCTT-GGGCCGCACGC  
GCGCTACAATGTAGTACGCAAAATGTT----CTAAAAACC--AAACCCGG-GAG---GG  
TA-AGGTAATCATAT-AATTTACTACGTAACCTGGGATTG-ATCTTTGTAATTTTTGATCA  
TCAACGAGGAATTCCTGTAAAGCGCAAATCATTACTTTGTGCTGAATCTGTCCCTGCCCT  
TTGTACACACCGCCGTCGCTCCTACCGATCGAATGATACGGTAAAGCTAACAGATAC--  
--GAT---T---C---G---CAA-G-----AATT-GTA-AAAG--TTA  
-TT-TAAATCT--C---ATT--GTTT

>AM168063.1 Hagiwaraea rhizopodium\_AusKY\_4

TCTAAG-TATAAATTTT-TATGATGAAA---CTGCAGAAGGCTCATT--ACAA--CA  
---GT---GATAAACTA-CCAGACTTTCGG-GCCTTT---GGCCTTTT-GGATAACCG  
CGGTAAATCGGGGCTAATACATACAAT-CG-AGGGG-TGACTGTT-----TAC-G-G-AA  
TCTCCGCGATTATT---A-GCT-TTC--AG-CCAACAC--TCTTCGGAGTTTTG--GGT  
GAACCCGGATAATATTGCAGATCGAAG-----CTTACGCTTTCGACAAGTCTGATGT  
GTCACTGCCCTATCAACTTTCGATGGTACGGTATTGGCCTACCATGGTTGTAACGGGTAA  
CGGAGAATTAGGGTTCGATTCCGGAGAGGGGCGCCTGAGAAATGGCGACCCTTCTACGGA  
AGGCAGCAGGCGCGCAAATT-ACTCAATCCCAATAC-GGGGAAGTAGTGACAAGAAATAT  
TAATGCCTATCCC-TC-ACGGGAAG--GTAATTAATAATGGATTAAACTAAACCCATTTT  
TT-AATACAATTGGAGGGCAAGTCTGGTCCAGCAGCCCGGTAATTCCAGCTCCAA-TA  
GCATATACTAAATTTGTTGCGGTTAAAA-AGC-TCGTAGTTGAAATTAATAATTACT-G  
GG-TTCA-----AGGTTTTAGTCGACTTCGG-TC-----GGTTAA-----A  
ACTTCCAGTGTAATTTTA-AACT--AATC-CAGGTTGCCAGTTACTTT-----GTA  
AT--TGGTTTTCTTT-----GGATACTTCACTGTGAGGAAA-TTGTGGTGCT  
TAAAGCA--AG-C--GTT--TTCGCTGATCTTTTGCAGCATGGTATGATAGAATATG  
ACAT--TTTATGT--AGTTGGCT--CGCA-----TAAAGTGAATGATTAATAGGGAT  
GGATGGGGGTGTTTCATATTGATGGGCGAGAGGTGAAATTCGTTGACCCTATCAAGATGAA  
CTTCTGCGAAAGCATTCCAAACTTCTCCATTAATCAAGAACGAAAGTTGGGGATC  
AAAGACGATCAGATACCGTCGTAGTCCAAACTATAAACTATGTCGACCAGGGATCAGCTA  
AT--AT-TTTTACAAAATATAGTTGGCACCTT-GTGAGAAATCAT-GAGTGTTTAGATTC  
TGGGGGGAGTATGGTTCGCAAGTCTGAAACTTAAAGGAATTGACGGAAGGGCACACAATGG  
AGTGGAG-CCTGCGGCTTAATTT-GACTCAACTCGGAAA-ACTTACCAAGCTAAGATAT  
AATAAGGATTGACAGA-CTAA-AAGATCTTTCATGATTCTATAAGTGGTGGTGCATGGTC  
GTTCTTAG-TTGGTGGAGCAATCTGTCTGGTCAATTCCGATAACGGACGAGATCTCGACC  
TGCTAACTAGTAGTACATATTAGCTCGATATGCAAGAAAGGCTTGTGGAGTAAGTTAGA  
GAT---CGCAAGG-TTT-----CTAGCCCTTCGCTGGT---CGAGTATTGTGGGTTAA  
TATA-GTGCGATAAATTTAAA-----CTTCTTAGAGGGACTACCT-GTGGCAAACAG  
GGGG-AAGTTCGAGGCAATAACAGGTCTGTGATGCCCTTAGATACCTT-GGGCCGCACGC  
GCGCTACAATGTAGTACGAAAAGGTA-----CTTTT--CC--AAACCCGG-AAG--GG  
TG-AGGTAATCCTAT-AATTTACTACGTAACCTGGGCTTG-ATCTTTGTAATTTTGTATCA  
TCAACGAGGAATTCCTTGTAAAGCGCAAATCATTACTTTGTGCTGAATCTGTCCCTGCCCT  
TTGTACACACCGCCCGTCTCTACCGATCGAATGATACGGTAAAGCTAACAGATAT--  
-G-T---C-----C-----G---CAA-G-----GA-T-GTA-AAAG--TTA  
-TT-TAAATCT--C---ATT--GTTT

>HQ141494.1 Hagiwaraea radiculata\_ML5A

TCTAAG-TATAAATTTT-TATGATGAAA---CTGCAGAAGGCTCATT--ACAA--CA  
---GT---GATAAACTA-CCAGACTTTCGG-GCCTTT---GGCCTTTT-GGATAACCG  
CAGTAAATCGGGGCTAATACATACAAT-CG-AGGGG-TGACTGTT-----TAC-G-G-AA  
TCTCCGCGATTATT---A-GCT-TTC--AG-CCAACAC--TCTTCG-AGTTTTG--GGT  
GAACCCGGATAATATTGCAGATCGAAG-----CTTACGCTTTCGACAAGTCTGATGT  
GTCACTGCCCTATCAACTTTCGATGGTACGGTATTGGCCTACCATGGTTGTAACGGGTAA  
CGGAGAATTAGGGTTCGATTCCGGAGAGGGGCGCCTGAGAAATGGCGACCCTTCTACGGA  
AGGCAGCAGGCGCGCAAATT-ACTCAATCCCAATAC-GGGGAAGTAGTGACAAGAAATAT  
TAATGCCTATCCC-TC-ACGGGAAG--GTAATTAATAATGGATTAAACTAAACCCATTTT  
TT-AATACAATTGGAGGGCAAGTCTGGTCCAGCAGCCCGGTAATTCCAGCTCCAA-TA  
GCATATACTAAATTTGTTGCGGTTAAAA-AGC-TCGTAGTTGAAATTAATAATTACT-G  
GG-TTCA-----AGGTTTTAGTCGACTTCGG-TC-----GGTTAA-----A  
ACTTCCAGTGTAATTTTA-AACT--AATC-CAGGTTGCCAGTTACTTT-----GTA  
AT--TGGTTTTCTTT-----GGATACTTCACTGTGAGGAAA-TTGTGGTGCT  
TAAAGCA--AG-C--GTT--TTCGCTGATCTTTTGCAGCATGGTATGATAGAATATG  
ACAT--TTTATGT--AGTTGGCT--CGCA-----TAAAGTGAATGATTAATAGGGAT  
GGATGGGGGTGTTTCATATTGATGGGCGAGAGGTGAAATTCGTTGACCCTATCAAGATGAA  
CTTCTGCGAAAGCATTCCAAACTTCTCCATTAATCAAGAACGAAAGTTGGGGATC  
AAAGACGATCAGATACCGTCGTAGTCCAAACTATAAACTATGTCGACCAGGGATCAGCTA  
AT--AT-TTTTACAAAATATAGTTGGCACCTT-GTGAGAAATCAT-GAGTGTTTAGATTC  
TGGGGGGAGTATGGTTCGCAAGTCTGAAACTTAAAGGAATTGACGGAAGGGCACACAATGG  
AGTGGAG-CCTGCGGCTTAATTT-GACTCAACTCGGAAA-ACTTACCAAGCTAAGATAT  
AATAAGGATTGACAGA-CTAA-AAGATCTTTCATGATTCTATAAGTGGTGGTGCATGGTC  
GTTCTTAG-TTGGTGGAGCAATCTGTCTGGTCAATTCCGATAACGGACGAGATCTCGACC  
TGCTAACTAGTAGTACATATTAGCTCGATATGCAAGAAAGGCTTGTGGAGTAAGTTAGA  
GAT---CGCAAGG-TTT-----CTAGCCCTTCGCTGGT---CGAGTATTGTGGGTTAA  
TATA-GTGCGATAAATTTAAA-----CTTCTTAGAGGGACTACCT-GTGGCAAACAG  
GGGG-AAGTTCGAGGCAATAACAGGTCTGTGATGCCCTTAGATACCTT-GGGCCGCACGC  
GCGCTACAATGTAGTACGAAAAGGTA-----CTTTT--CC--AAACCCGG-AAG--GG  
TG-AGGTAATCCTAT-AATTTACTACGTAACCTGGGCTTG-ATCTTTGTAATTTTGTATCA  
TCAACGAGGAATTCCTTGTAAAGCGCAAATCATTACTTTGTGCTGAATCTGTCCCTGCCCT  
TTGTACACACCGCCCGTCTCTACCGATCGAATGATACGGTAAAGCTAACAGATAT--  
-G-T---C-----C-----G---CAA-G-----GACT-GTA-AAAG--TTA  
-TT-TAAATCT--C---ATG--TTTT

>AM168062.1 Hagiwaraea vinaceofusca\_CC4

TCTAAG-TATAAATTTT-TATGATGAAA---CTGCAGAAGGCTCATT--ACAA--CA  
---GT---GATAAACTA-CTAGACTTTCGG-GCCTT---CGGCCTTTT-GGATAACCG

CAGTAAATCGGGGGCTAATACATACAAT-CG-AGGGG-TGACTGTT-----TAC-G-G-AA  
TCTCCGCGATTATT---A-GCT-TTC--AG-CCAACAC--TCTTCGGAGTTTTG--GGT  
GAACCCGGATAAATATTGCAGATCGAAG-----CTTACGCTTTTCGACAAGTCTAATGT  
GTCACTGCCCTATCAACTTTTCGATGGTACGGTATTGGCCTACCATGGTTGTAACGGGTAA  
CGGAGAATTAGGGTTTCGATTCCGGAGAGGGGCGCCTGAGAAATGGCGACCATTCTACGGA  
AGGCAGCAGGCGCGCAAAT-ACTCAATCCCAATAC-GGGGAAGTAGTGACAAGAAATAT  
TAATGCCTATCCC-TT-TCGGGAAG--GTAATTAATAATGGATTAAACTAAACCCATTTT  
TT-AATACAATTGGAGGGCAAGTCTGGTGCCAGCAGCCGCGGTAATTCCAGCTCCAA-TA  
GCATATACTAAATTTGTTGCGGTTAAAA-AGC-TCGTAGTTGAAGTTAAAAATTACT-G  
GG-TTCA-----AGGTTTTAATCGACTCTG--TC-----GGTTTAA----A  
ACTTCCAGTGTAGCTTTTA-CAACT---CATC-CAGGTTTCTTGGTACTTT-----GTA  
TC--AGGTTTTCTTT-----GGATATTTCACTGCGAGGAAA-TTGTGGTGCT  
TAAAGCA--GG-C---GTT--TTCGCTGATCTTTTGCAGCATGGTATGATAGAATATG  
ACAT---TTTATGT--AGTTGGCT--CGCA-----TAAAGTGAATGATTAATAGGGAT  
GGATGGGGGTGTTTCATATTGATGGGCGAGAGGTGAAATTCGTTGACCCTATCAAGATGAA  
CTTCTGCGAAAAGCATTACCAAATACTTCTCCATTAATCAAGAACGAAAGTTTGGGGATC  
AAAGACGATCAGATACCGTCGTAGTCCAAACTATAAACTATGTCGACCAGGGATCAGCTA  
AT--AT-TTTTAAAAAATATAGTTGGCACCTT-GTGAGAAATCAT-GAGTGTTTAGATT  
TGGGGGAGTATGGTCGAAGTCTGAACTTAAAGGAATTAACGGAAGGGCACACAATGG  
AGTGGAG-CCTGCGGCTTAATTT-GACTCAACTCGGAAA-ACTTACCAAGCTAAGATAT  
AATAAGGATTGACAGA-CTAA-AAGATCTTTCATGATTCTATAAGTGGTGGTGCATGGTC  
GTTCTTAG-TTGGTGGAGCAATCTGTCTGGTCAATTCCGATAACGGACGAGATCTCGACC  
TGCTAACTAGTAGTACATATTAGCTCGATATGCAAGAAAGGCTTGTGGAGTAAGTTATG  
GAT----CGCAAGG-TTC-----ATAGCCTTTCGCTGGT----CGAGTATTGTGAGTTAA  
TATA-GTGCGATACAATAAAA-----CTTCTTAGAGGGACTACCT-GTGGCAAACAG  
GGGG-AAGTTCGAGGCAATAACAGGTCTGTGATGCCCTTAGATACCTT-GGGCCGACGC  
GCGCTACAATGTAGTACGCCAAAAGGTT----TTTTG--CC--AAGCCCGG-AAG---GG  
TG-AGGTAATCCTAT-AATTTACTACGTAACCTGGGATTG-ATCTTTGTAATTTTGTATCA  
TCAACGAGGAATTCCTTGTAAAGCGCAAATCATTACTTTGTGCTGAATCTGTCCCTGCCCT  
TTGTACACACCGCCCGTCTCTACCGATCGAATGATACGGTAAAGCTAACAGATAC--  
--AAT---T-----C-----G---CAA-G-----AGTT-GTA-AAAG--TTA  
-TT-TAAATCT--C----ATT--GTTT

>AM168047.1 *Hagiwaraea lavandula* B15

TCTAAG-TATAAATTTTAA-TATGATGAAA---CTGCAGAAGGCTCATT--ACAA--CA  
---GT---GATAAACTA-CTAGACTTTTCGG-GCTTC---GGCCTTTT-GGATAACCG  
CAGTAAATCGGGGCTAATACATACAAT-CG-AGGGG-TGACTGTT-----TAC-G-G-AA  
TCTCCGCGATTATT---A-GCT-TTC--AG-CCAACAC--TCTTCGGAGTTTTG--GGT  
GAACCCGGATAAATATTGCAGATCGAAG-----CTTACGCTTTTCGACAAGTCTAATGT  
GTCACTGCCCTATCAACTTTTCGATGGTACGGTATTGGCCTACCATGGTTGTAACGGGTAA  
CGGAGAATTAGGGTTTCGATTCCGGAGAGGGGCGCCTGAGAAATGGCGACCATTCTACGGA  
AGGCAGCAGGCGCGCAAAT-ACTCAATCCCAATAC-GGGGAAGTAGTGACAAGAAATAT  
TAATGCCTATCCC-TT-TCGGGAAG--GTAATTAATAATGGATTAAACTAAACCCATTTT  
TT-AATACAATTGGAGGGCAAGTCTGGTGCCAGCAGCCGCGGTAATTCCAGCTCCAA-TA  
GCATATACTAAATTTGTTGCGGTTAAAA-AGC-TCGTAGTTGAAGTTAAAAATTACT-G  
GG-TTCA-----AGGTTTTAGCCGACTTTG--TC-----GGTTTAA----A  
ACTTCCAGTGTAGCTTTTA-CAACT---CGTC-CAGGTTCTTGGTACTTT-----GTA  
TC--AGGTTCTCTTT-----GGACATTTCACTGTGAGGAAA-TTGTGGTGCT  
TAAAGCA--GG-C---GTT--TTCGCTGATCTTTTGCAGCATGGTATGATAGAATATG  
ACAT---TTTATGT--AGTTGGCT--CGCA-----TAAAGTGAATGATTAATAGGGAT  
GGATGGGGGTGTTTCATATTGATGGGCGAGAGGTGAAATTCGTTGACCCTATCAAGATGAA  
CTTCTGCGAAAAGCATTACCAAATACTTCTCCATTAATCAAGAACGAAAGTTTGGGGATC  
AAAGACGATCAGATACCGTCGTAGTCCAAACTATAAACTATGTCGACCAGGGATCAGCTA  
AT--AT-TTTTAAAAAATATAGTTGGCACCTT-GTGAGAAATCAT-GAGTGTTTAGATT  
TGGGGGAGTATGGCGCAAGTCTGAACTTAAAGGAATTAACGGAAGGGCACACAATGG  
AGTGGAG-CCTGCGGCTTAATTT-GACTCAACTCGGAAA-ACTTACCAAGCTAAGATAT  
AATAAGGATTGACAGA-CTAA-AAGATCTTTCATGATTCTATAAGTGGTGGTGCATGGTC  
GTTCTTAG-TTGGTGGAGCAATCTGTCTGGTCAATTCCGATAACGGACGAGATCTCGACC  
TGCTAACTAGTAGTACATATTAGCTCAATATGCAAGAAAGGCTTGTGGAGTAGGTCATG  
GAT----CGCAAGG-TTC-----ATGGCTTTCGCTGGT----CGAGTATTGTGAGTTAA  
TAT--GTGCGATAAAAATAAAA-----CTTCTTAGAGGGACTACCT-GTGGCAAACAG  
GGGG-AAGTTCGAGGCAATAACAGGTCTGTGGTGCCCTTAGATACCTT-GGGCCGACGC  
GCGCTACAATGTAGTACGCAAAAAGGTA----TTTTG--CC--AAGCCCGG-AAG---GG  
TA-AGGTAATCCTAT-AATTTACTACGTAACCTGGGCTTG-ATCTTTGTAATTTTGTATCA  
TCAACGAGGAATTCCTTGTAAAGCGCAAATCATTACTTTGTGCTGAATCTGTCCCTGCCCT  
TTGTACACACCGCCCGTCTCTACCGATCGAATGATACGGTAAAGCTAACAGATAT--  
--AA---CT-----C-----G---CAA-G-----AGTT-GTA-AAAG--TTA  
-TT-TAAATCT--C----ATT--GTTT

>AM168075.1 *Raperostelium tenue* PR4

TCTAAG-TATAAATTTTAA-TATGATGAAA---CTGCAGACGGGCTCATT--ACAA--CA  
---GT---AATAAACTA-ATAGACTTTTCGG-GTTTTA---TTACCTTTT-GGATAACCG  
CAGTAAATCGGGGCTAATACATACAAT-CG-AGGGG-TGACTGTT-----TAC-G-G-AA  
TCTCCGCGATTATT---A-GCT-TTCTCAA-CCAATAC--CCTTCGGGGTTTTGATGGT  
GAAACCGAATAAATATTGCAGATCGAAG-----CTT-CGGCATCGACAAGTCTATTGT

GTTACTGCCCTATCAACTTTCGATGGTACGGTATTGGCCTACCATGGTTGTAACGGGTAA  
CGGGGAATTAGGGTTCGATTCCGGAGAGGGCGCCTGAGAAATGGCGACCACTTCTACGGA  
AGGCAGCAGGCGCGCAAATT-ACTCAATCCCAATAC-GGGGAAGTAGTGACAAGAAATAT  
TAATGCCTATCC--TC-ATAGGAAG--GTAATTAATAATGGGTCTAAACTAAATCCATTTT  
CT-AATACAATTGGAGGGCAAGTCTGGTGCCAGCAGCCGCGGTAATTCCAGCTCCAA-TA  
GCATATACTAAATTTGGTTCGGTTAAAA-AGC-TCGTAGTTGAAATTAAGTCATATT-G  
GG-TTAA-----TAGGTGTTAGCCG-ATTTAATG----T-CGGTTTAA-----T  
GCTTCCAGTATGATTTTT-TAAAT--TGA-CTTGGGTTCCGGTACTTT-----GTA  
GT-CGGGCTCGTTA-----GGGTTCTTCACTGTGAGAAAAATTGTGGTGCT  
TAA-GCA--GG-C---GTT---T-CGCTTGTATCTTTTGCAGCATGGTATGATAGAACATG  
ACAT---TTTGC-ATTTGGTT---GCG----TTAAAGTGAATGATTAATAGGGAT  
GGATGGGGGTGTTTCATATCGGTGGGCGAGAGGTGAAATTCGTTGACCCTATCAAGATGAA  
CTTCTGCGAAAGCATTACCAAACTTCCCATTAATCAAGAACGAAAGTTTGGGGATC  
AAAGACGATCAGATACCGTCTGATGCCAACTATAAACTATGTGACACAGGGATCAGCTA  
AA--AT-TTCTAAAAAATTTAGTTGGCACCTT-GTGAGAAATCAT-GAGTGTTTAGATT  
TGGGGGGAGTATGGTTCGCAAGTCTGAACTTAAAGGAATTGACGGAAGGGCACACAATGG  
AGTGGAG-CCTGCGGCTTAATTT-GACTCAACTCGGGAAA-ACTTACCAAGCTAAGATAT  
AATAAGGATTGACAGA-CTAA-AAGATCTTTCATGATTGTATAAGTGGTGGTGCATGGTC  
GTTCTTAG-TTGGTGGAGCCATCTGTCTGGTCAATCCGATAACGACGAGATCTCGACC  
TGCTAACTAGTAGTACCTATTAGCTCAATATGCATGAAAGCTTTGTTGGAGTAAAGTTGTA  
GGT---CGAAAGG-TTT----ACAACACTTCGCTGGG---TCGGTAAATGTAATTA  
TA-G-GTACGAT-AA---ACAAA---A--CTTCTTAGAGGGACTACCT-GTGGCAAACAG  
GGG-AAGTTCGAGGCAATAACAGGTCTGTGATGCCCTTAGATACCTT-GGGCCGCACGC  
GCGCTACAATGTAGTACGCAAAAAGCT-----AT-----CC--TGGTCCGG-AAG---GA  
TT-GGGTAATCATAA--ATTTACTACGTAACCTGGGATTG-ATCTTTGTAATTATTGATCA  
TCAACGAGGAATTCCTTGTAAAGCGCAAATCATTACTTTGTGCTGAATATGTCCCTGCCCT  
TTGTACACACCGCCGTCGCTCTACCGATCGAATGATACGGTAAAGCCAACAGATTG--  
-G-----GT-----C-TGTAG---CAA-T-ACT-T-----GATC-CGA-AAAG--TTG  
-TT-TAAATCT--C----ATT--GTTT

>AM168094.1 *Raperostelium tenue* PJ6

TCTAAG-TATAAATTTTT-TATGATGAAA----CTGCAGACGGCTCATT--ACAA--CA  
---GT---AATAAATA-ATAGACTTTCGG-GTTTTA---TTACCTTTT-GGATAACCG  
CAGTAAATCGGGGCTAATACATAAAT-CG-AGGGG-TGACTGTT-----TAC-G-G-AA  
TCTCCGCGATTATT---A-GCT-TTCTCAA-CCAATAC--CCTTCGGGGTTTTGATGGT  
GAAACCGAATAATATTGCAGATCGAAG-----CTT-CGGCATCGACAAGTCTATTGT  
GTTACTCCCTATCAACTTTCGATGGTACGGTATTGGCCTACCATGGTTGTAACGGGTAA  
CGGGGAATTAGGGTTCGATTCCGGAGAGGGCGCCTGAGAAATGGCGACCACTTCTACGGA  
AGGCAGCAGGCGCGCAAATT-ACTCAATCCCAATAC-GGGGAAGTAGTGACAAGAAATAT  
TAATGCCTATCC--TC-ATAGGAAG--GTAATTAATAATGGGTCTAAACTAAATCCATTTT  
CT-AATACAATTGGAGGGCAAGTCTGGTGCCAGCAGCCGCGGTAATTCCAGCTCCAA-TA  
GCATATACTAAATTTGGTTCGGTTAAAA-AGC-TCGTAGTTGAAATTAAGTCATATT-G  
GG-TTAA-----TAGGTGTTAGCCG-ATTTAATG----T-CGGTTTAA-----T  
GCTTCCAGTATGATTTTT-TAAAT--TGA-CTTGGGTTCCGGTACTTT-----GTA  
GT-CGGGCTCGTTA-----GGGTTCTTCACTGTGAGAAAA-TTGTGGTGCT  
TAAAGCA--GG-C---GTT---T-CGCTTGTATCTTTTGCAGCATGGTATGATAGAACATG  
ACAT---TTTGC-ATTTGGTT---GCG----TTAAAGTGAATGATTAATAGGGAT  
GGATGGGGGTGTTTCATATCGGTGGGCGAGAGGTGAAATTCGTTGACCCTATCAAGATGAA  
CTTCTGCGAAAGCATTACCAAACTTCCCATTAATCAAGAACGAAAGTTTGGGGATC  
AAAGACGATCAGATACCGTCTGATGCCAACTATAAACTATGTGACACAGGGATCAGCTA  
AA--AT-TTCTAAAAAATTTAGTTGGCACCTT-GTGAGAAATCAT-GAGTGTTTAGATT  
TGGGGGGAGTATGGTTCGCAAGTCTGAACTTAAAGGAATTGACGGAAGGGCACACAATGG  
AGTGGAG-CCTGCGGCTTAATTT-GACTCAACTCGGGAAA-ACTTACCAAGCTAAGATAT  
AATAAGGATTGACAGA-CTAA-AAGATCTTTTATGATTGTATAAGTGGTGGTGCATGGTC  
GTTCTTAG-TTGGTGGAGCAATCTGTGGTCAATCCGATAACGACGAGATCTCGACC  
TGCTAACTAGTAGTACCTATTAGCTCAATATGCATGAAAGCTTTGTTGGAGTAAAGTTGTA  
GGT---CGAAAGG-TTT----ACAACACTTCGCTGGG---TCGGTAAATGTAATTA  
TA-G-GTACGAT-AA---ACAAA---A--CTTCTTAGAGGGACTACCT-GTGGCAAACAG  
GGG-AAGTTCGAGGCAATAACAGGTCTGTGATGCCCTTAGATACCTT-GGGCCGCACGC  
GCGCTACAATGTAGTACGCAAAAAGCT-----AT-----CC--TGGTCCGG-AAG---GA  
TT-GGGTAATCATAA--ATTTACTACGTAACCTGGGATTG-ATCTTTGTAATTATTGATCA  
TCAACGAGGAATTCCTTGTAAAGCGCAAATCATTACTTTGTGCTGAATATGTCCCTGCCCT  
TTGTACACACCGCCGTCGCTCTACCGATCGAATGATACGGTAAAGCCAACAGATTG--  
-G-----GT-----C-TGTAG---CAA-T-ACT-T-----GATC-CGA-AAAG--TTG  
-TT-TAAATCT--C----ATT--GTTT

>JF892721.1 *Raperostelium capillare* 37A

TCTAAG-TATAAATTTTT-TATGATGAAA----CTGCAGACGGCTCATT--ACAA--CA  
---GT---AATAAATA-ATAGACTTTCGG-GTTTTA---TTACCTTTT-GGATAACCG  
CAGTAAATCGGGGCTAATACATAAAT-CG-AGGGG-TGACTGTT-----TAC-G-G-AA  
TCTCCGCGATTATT---A-GCA-IT--CAA-CCAATAC--CTTTCGAGGTTTTG-TGGT  
GAAACCGAATAATATTGCAGATCAAAG-----CTTTCGGCTTTGACAAGTCTATTGT  
GTTACTGCCCTATCAACTTTCGATGGTACGGTATTGGCCTACCATGGTTGTAACGGGTAA  
CGGGGAATTAGGGTTCGATTCCGGAGAGGGCGCCTGAGAAATGGCGACCACTTCTACGGA  
AGGCAGCAGGCGCGCAAATT-ACTCAATCCCAATAC-GGGGAAGTAGTGACAAGAAATAT

TAATGCCTATCC--TT-TTAGGAAG--GTAATTA AAAATGGGTCTAAACTAAATCCATTTT  
CT-AATACAATTGGAGGGCAAGTCTGGTGCCAGCAGCCGCGTAATCCAGCTCCAA-TA  
GCATATACTAAATTTGTTGCGGTTAAAA-AGC-TCGTAGTTTAAACAAAAATTATATT-G  
GG-CTAA-----TAGGTGTTAGCCGATTTTTATC-----C-CGGTTTAA-----T  
ACTTCCAATATATATTTTT-TAAATATTAGCT-CTTGGATTTGGTTACTTTT-----GTA  
ATTCAAGTTCGTTA-----GAGTCCTTACTGTGAGAAAA-TTGTGGTGCT  
TAAAGCA--GG-C---GTT---T-CGCTTGATCTTTTGCAGCATGGTATGATAGAACATG  
ACAT---TTTGTGC--TATTGGTT---GCA-----TTAAAGTGTAATGATTAATAGGGAT  
GGATGGGGGTGTTTCATATTGGTGGGCGAGAGGTGAAATTCGTTGACCCTATCAAGATGAA  
CTTCTGCGAAAGCATTACCAAACTACTTCCCATTAAATCAAGAACGAAAGTTTGGGGATC  
AAAGACGATCAGATACCGTCGTAGTCCAAACTATAAACTATGTCGACCAGGGATCAGCTA  
AA--AT-TTCTAAAAAATTTAGTTGGCACCTT-GTGAGAAATCAC-GAGTGTTTAGATT  
TGGGGGGAGTATGGTGCAGAGTCTGAACTTAAAGGAATTGACGGAAGGGCACACAATGG  
AGTGGAG-CCTGCGGCTTAATTT-GACTCAACTCGGGAAA-ACTTACCAAGCTAAGATAT  
AATAAGGATTGACAGA-CTAA-AAGATCTTTCATGATTGTATAAGTGGTGGTGCATGGTC  
GTTCTTAG-TTGGTGGAGCAATCTGTCTGGTCAATTCCGATAACGGACGAGATCTCGACC  
TGCTAACTAGTAGTACATATTAGCTCAATATGCATGAAAGATTAGTTGGAGTAAGTTGTA  
GGT---CGAAAGG-TTT-----ACAGCACTTCACTGGT---TCGGTAATGTGAATTA  
TATG-GTACGAT-AA---ATAAA---A--CTTCTAGAGGGACTACCT-GTGGCAAACAG  
GGGG-AAGTTCGAGGCAATAACAGGTCTGTGATGCCCTTAGATACCTT-GGGCCGCACGC  
GCGCTACAATGTAGTACGCAAAAAGCT-----CT-----CC--TGGTCCGG-AAG---GA  
TT-GGGTAATCAAAA-AATTTACTACGTAACCTGGGATTG-ATCTTTGTAATTATTGATCA  
TCAACGAGGAATTCCTGTAAAGCGCAAATCATTACTTTGTGCTGAATATGTCCCTGCCCT  
TTGTACACACCGCCCGTCTCTACCGATCGAATGATACGGTAAAGCCAACAGATTG--  
-GAT-----C-TGTAG---CAA-T-ACA-----GAGC-TGA-AAAG--TTG  
-TT-TAAATCT--C---ATT--GTT-

>JF892724.1 *Raperostelium filiforme* OH603

TCTAAG-TATAAATTTTAT-TATGATGAAA----CTGCAGACGGCTCAAT--ACAA--CA  
---GT---AATAAACTA-ATAGACTTTTCGG-GTTTTA---TTACCTTTT-GGATAACCG  
CAGTAAATCGGGGCTAATACATACAAT-CG-AGGGC-TGACTGTT-----TAC-G-G-AA  
TGTCCCGATTATT---A-GCA-TT--CAA-CCAATAC--CTTTCGAGTTTTG-TGGT  
GAAACCGAATAATATTGCAGATCAAAG-----CTT-CGGCTTTGACAAGTCTATTGT  
GTTACTGCCCTATCAACTTTTCGATGGTACGGTATTGGCCTACCATGGTTGTAACGGGTAA  
CGGGGAATTAGGGTTCGATTCCGGAGAGGGCGCCTGAGAAATGGCGACCCTTCTACGGA  
AGGCAGCAGGCGCGCAAAT-ACTCAATCCCAATAC-GGGGAAGTAGTGACAAGAAATAT  
TAATGCCTATCC--TT-TTAGGAAG--GTAATTA AAAATGGGTCTAAACTAAATCCATTTT  
CT-AATACAATTGGAGGGCAAGTCTGGTGCCAGCAGCCGCGTAATCCAGCTCCAA-TA  
GCATATACTAAATTTGTTGCGGTTAAAA-AGC-TCGTAGTTTAAACAAAAATTATATT-G  
GG-CTAA-----TAGGTGTTAGCCGATTTTTATC-----C-CGGTTTAA-----T  
ACTTCCAATATATATTTTT-TAAATATTAGCT-CTTGGATCTGGTTACTTTT-----GTA  
ATTCAGGTTTCGTTA-----GAGTCCTTACTGTGAGAAAA-TTGTGGTGCT  
TAAAGCA--GG-C---GTT---T-CGCTTGATCTTTTGCAGCATGGTATGATAGAACATG  
ACAT---TTTGTGC--TATTGGTT---GCA-----TTAAAGTGTAATGATTAATAGGGAT  
GGATGGGGGTGTTTCATATTGGTGGGCGAGAGGTGAAATTCGTTGACCCTATCAAGATGAA  
CTTCTGCGAAAGCATTACCAAACTACTTCCCATTAAATCAAGAACGAAAGTTTGGGGATC  
AAAGACGATCAGATACCGTCGTAGTCCAAACTATAAACTATGTCGACCAGGGATCAGCTA  
AA--AT-TTCTAAAAAATTTAGTTGGCACCTT-GTGAGAAATCAC-GAGTGTTTAGATT  
TGGGGGGAGTATGGTGCAGAGTCTGAACTTAAAGGAATTGACGGAAGGGCACACAATGG  
AGTGGAG-CCTGCGGCTTAATTT-GACTCAACTCGGGAAA-ACTTACCAAGCTAAGATAT  
AATAAGGATTGACAGA-CTAA-AAGATCTTTCATGATTGTATAAGTGGTGGTGCATGGTC  
GTTCTTAG-TTGGTGGAGCAATCTGTCTGGTCAATTCCGATAACGGACGAGATCTCGACC  
TGCTAACTAGTAGTACATATTAGCTCAATATGCATGAAAGATTAGTTGGAGTAAGTTGTA  
GGT---CGAAAGG-TTT-----ACAGCACTTCACTGGT---TCGGTAATGTGAATTA  
TATG-GTACGAT-AA---ATAAA---A--CTTCTAGAGGGACTACCT-GTGGCAAACAG  
GGGG-AAGTTCGAGGCAATAACAGGTCTGTGATGCCCTTAGATACCTT-GGGCCGCACGC  
GCGCTACAATGTAGTACGCAAAAAGCT-----CT-----CC--TGGTCCGG-AAG---GA  
TT-GGGTAATCAAAA-AATTTACTACGTAACCTGGGATTG-ATCTTTGTAATTATTGATCA  
TCAACGAGGAATTCCTGTAAAGCGCAAATCATTACTTTGTGCTGAATATGTCCCTGCCCT  
TTGTACACACCGCCCGTCTCTACCGATCGAATGATACGGTAAAGCCAACAGATTG--  
-G-T---TT---C--GTAG-G-CAA-T-TCA-----GAGC-TGA-AAAG--ATA  
-TT-TAAATCT--C---ATT--GTTT

>HQ141491.1 *Raperostelium* sp. TH14B

TCTAAG-TATAAATTTTAT-TATGATGAAA----CTGCAGACGGCTCATT--ACAA--CA  
---GT---AATAAACTA-ATAGACTTTTCGG-GTTTTA---TTACCTTTT-GGATAACCG  
CAGTAAATCGGGGCTAATACATACAAT-CG-AGGGG-TGACTGTT-----TAC-G-G-AA  
TCCCGCGATTATT---A-GCT-TTT-CAA-CCAATACTCTTTT-GGAGTTTTG-TGGT  
GAAACCGAATAATATTGCAGATCGAAG-----CTT-AGGCATCGACAAGTCTACTGT  
GTTACTGCCCTATCAACTTTTCGATGGTACGGTATTGGCCTACCATGGTTGTAACGGGTAA  
CGGGGAATTAGGGTTCGATTCCGGAGAGGGCGCCTGAGAAATGGCGACCCTTCTACGGA  
AAGCAGCAGGCGCGCAAAT-ACTCAATCCCAATAC-GGGGAAGTAGTGACAAGAAATAT  
TAATGCCTATCC--TT-TTAGGAAG--GTAATTA AAAATGGGTCTAAACTAAATCCATTTT  
CT-AATACAATTGGAGGGCAAGTCTGGTGCCAGCAGCCGCGTAATCCAGCTCCAA-TA  
GCATATACTAAATTTGTTGCGGTTAAAA-AGC-TCGTAGTTGAAATTA AAAATTACATT-G

GG-CTAAA-----TAGGTTTTAGCCGATTTTTTCATC-----GGTTTAA-----A  
ACTTCCAATGTATATTTTT-TAAATTTTTGGCT-CATGAATTTGGTTACTTTT----GTA  
ATTCAAGTTCTTTT-----GGTTCTTACTGTGAGAAAA-TTGTGGTGCT  
TAAAGCA--GG-C---GTT---TTCGCTTGATCTTTTGCAGCATGGGATGATAGAACATG  
ACAT--TTTGCGC--TATTGGTT--GCG----TTAAAGTGAATGATTAATAGGGAT  
GGATGGGGGTGTTCAATATGGTGGGCGAGAGGTGAAATTCGTTGACCCTATCAAGATGAA  
CTTCTGCGAAAGCATTACCAAATACTTCCCATTAAATCAAGAACGAAAAGTTGGGGATC  
AAAGACGATCAGATACCGTCGTAGTCCAAACTATAAACTATGTGACACAGGGATCAGCTA  
AA--AT-TTCTAAAAAATTTAGTTGGCACCTT-GTGAGAAATCAC-GAGTGTTTAGATT  
TGGGGGGAGTATGGTTCGCAAGTCTGAACTTAAAGGAATTGACGGAAGGGCACACAATGG  
AGTGGAG-CCTGCGCTTAATTT-GACTCAACTCGGGAAA-ACTTACCAAGCTAAGATAT  
AATAAGGATTGACAGA-CTAA-AAGATCTTTCATGATTGTATAAGTGGTGGTGCATGGTC  
GTTCTTAG-TTGGTGGAGCAATCTGTCTGGTCAATTCCGATAACGGACGAGATCTCGACC  
TGCTAACTAGTAGTACTTACAGCTCAATATGCACGAAAGCTTTGTTGGAGTAAGTTGTA  
GGT----CGAAAGG-TTT----ACAACACTTCGCTGAG----TCGGTAGTGTGAATTGA  
TAA--GTACGCTTAA--ATAAA---A--CTTCTTAGAGGGACTACCT-GTGGCAAAACAG  
GGGG-AAGTTCGAGGCAATAACAGGTCTGTGATGCCCTTAGATACCTT-GGGCCGCACGC  
GCGCTACAATGTAGTACGCAAAAAGCA----AT----CC--TGGTCCGG-AAG---GA  
CT-GGGTAATCATAA--ATTTACTACGTAACCTGGGATTG-ATCTTTGTAATTATTGATCA  
TCAACGAGGAATTCCTTGTAAGCGCAAATCATTACTTTGTGCTGAATATGTCCCTGCCCT  
TTGTACACACCGCCCGTCTCTACCGATCGAATGATACGGTAAAGCCAACAGATTA--  
---AT---GTA---T-T-TGG-G-AAA-CCATT-T-----ACGT-TGA-AAAAG--TTG  
-TT-TAAATCT--C---AT---GTT-

>AM168078.1 *Raperostelium gracile*\_TNS\_C\_183

TCTAAG-TATAAATTTTTA-TATGATGAAA----CTGCAGACGGCTCATT--ACAA--CA  
---GT----AATAAACTA-ATAGACTTTCGG-GTTTTA---TTACCTTTT-GGATAACCG  
CAGTAAATCGGGGCTAATACATACAAT-CG-AGGGG-TGACTGTT-----TAC-G-G-AA  
TCCCGCGATTATT----A-GCT-TTT-CAA-CCAATACCTTTTTGGAGTTTTG-TGGT  
GAAACCGAATAATATTGCAGATCGAAG-----CTT-AGGCATCGACAAGTCTACTGT  
GTTACTGCCCTATCAACTTTCGATGGTACGGTATTGGCTACCATGGTTGTAACGGGTAA  
CGGGGAATTAGGTTTCGATTCCGGAGAGGGCGCCTGAGAAATGGCGACCCTTCTACGGA  
AGGAGCAGGCGCGCAAATT-ACTCAATCCCAATAC-GGGGAAGTAGTGACAAGAAATAT  
TAATGCCTATCC--TT-TTAGGAAG--GTAATTAATAATGGGTCTAAACTAAATCCATTT  
CT-AATACAATTGGAGGGCAAGTCTGGTGCCAGCAGCCGCGGTAATTCCAGCTCAA-TA  
GCATATACTAAATTTGTGCGGTTAAAA-AGC-TCGTAGTTGAAATTAATAATTATATT-G  
GG-CTAAA-----TAGGTTTTAGCCGATTTTTTCATC-----GGTTTAA-----A  
ACTTCCAATATATATTTTT-TAAATTTTTGGCT-CATGAATTTGGTTACTTTT----GTA  
ATTCAAGTTCTTTT-----GGTTCTTACTGTGAGAAAA-TTGTGGTGCT  
TAAAGCA--GG-C---GTT---TTCGCTTGATCTTTTGCAGCATGGGATGATAGAACATG  
ACAT--TTTGCGC--TATTGGTT--GCG----TTAAAGTGAATGATTAATAGGGAT  
GGATGGGGGTGTTCAATATGGTGGGCGAGAGGTGAAATTCGTTGACCCTATCAAGATGAA  
CTTCTGCGAAAGCATTACCAAATACTTCCCATTAAATCAAGAACGAAAAGTTGGGGATC  
AAAGACGATCAGATACCGTCGTAGTCCAAACTATAAACTATGTGACACAGGGATCAGCTA  
AA--AT-TTCTAAAAAATTTAGTTGGCACCTT-GTGAGAAATCAC-GAGTGTTTAGATT  
TGGGGGGAGTATGGTTCGCAAGTCTGAACTTAAAGGAATTGACGGAAGGGCACACAATGG  
AGTGGAG-CCTGCGCTTAATTT-GACTCAACTCGGGAAA-ACTTACCAAGCTAAGATAT  
AATAAGGATTGACAGA-CTAA-AAGATCTTTCATGATTGTATAAGTGGTGGTGCATGGTC  
GTTCTTAG-TTGGTGGAGCAATCTGTCTGGTCAATTCCGATAACGGACGAGATCTCGACC  
TGCTAACTAGTAGTACTTACAGCTCAATATGCACGAAAGCTTTGTTGGAGTAAGTTGTA  
GGT----CGAAAGG-TTT----ACAACACTTCGCTTGG----TCGGTAGTGTGAATTGA  
TAA--GTACGCTTAA--ATAAA---A--CTTCTTAGAGGGACTACCT-GTGGCAAAACAG  
GGGG-AAGTTCGAGGCAATAACAGGTCTGTGATGCCCTTAGATACCTT-GGGCCGCACGC  
GCGCTACAATGTAGTACGCAAAAAGCA----AT----CC--TGGTCCGG-AAG---GA  
CT-GGGTAATCATAA--ATTTACTACGTAACCTGGGATTG-ATCTTTGTAATTATTGATCA  
TCAACGAGGAATTCCTTGTAAGCGCAAATCATTACTTTGTGCTGAATATGTCCCTGCCCT  
TTGTACACACCGCCCGTCTCTACCGATCGAATGATACGGTAAAGCCAACAGATTA--  
---AT---GTA---T-TATGG-G-CAA-CCATTTT-----ACGT-TGA-AAAAG--TTG  
-TT-TAAATCT--C---ATT--GTTT

>JF892719.1 *Raperostelium maeandriforme*\_OH604

TCTAAG-TATAAATTTTTA-TATGATGAAA----CTGCAGACGGCTCATT--ACAA--CA  
---GT----AATAAACTA-ATAGACTTTCGG-GTTTTA---TTACCTTTT-GGATAACCG  
CAGTAAATCGGGGCTAATACATACAAT-CG-AGGGG-TGACTGTT-----TAC-G-G-AA  
TCTCCGCGATTATT----A-GCA-TT--CAA-CCAATAC--CTTTCGAGGTTTTG-TGGT  
GAAACCGAATAATATTGCAGATCGAAG-----CTT-CGGCTTGACAAGTCTATTGT  
GTTACTGCCCTATCAACTTTCGATGGTACGGTATTGGCTACCATGGTTGTAACGGGTAA  
CGGGGAATTAGGTTTCGATTCCGGAGAGGGCGCCTGAGAAATGGCGACCCTTCTACGGA  
AGGAGCAGGCGCGCAAATT-ACTCAATCCCAATAC-GGGGAAGTAGTGACAAGAAATAT  
TAATGCCTATCC--TT-TTAGGAAG--GTAATTAATAATGGGTCTAAACTAAATCCATTT  
CT-AATACAATTGGAGGGCAAGTCTGGTGCCAGCAGCCGCGGTAATTCCAGCTCAA-TA  
GCATATACTAAATTTGTGCGGTTAAAA-AGC-TCGTAGTTTAAACAAAAATTATATT-G  
GG-CTAAA-----TAGGTTAGCCGATTTTTATAA---GC-CGGTTTTA-----T  
ACTTCCAATATATATTTTT-TAAATATTAGCT-CTTGGATTTGGTTACTTTT----GTA  
ATTCAAGTTCGTTA-----GAGTCTTACTGTGAGAAAA-TTGTGGTGCT

TAAAGCA--GG-C---GTT---T-CGCTTGATCTTTTGCAGCATGGTATGATAGAACATG  
ACAT---TTTGTGC--TATTGGTT---GCA----TAAAAGTGAATGATTAATAGGGAT  
GGATGGGGGTGTTCAATTGGTGGGCGAGAGGTGAAATTCGTTGACCCTATCAAGATGAA  
CTTCTGCGAAAGCATTACCAAATACTTCCCCATTAATCAAGAACGAAAGTTTGGGGATC  
AAAGACGATCAGATACCGTCGTAGTCCAAACTATAAACTATGTGACCCAGGGATCAGCTA  
AA--AT-TTCTAAAAAATTTAGTTGGCACCTT-GTGAGAAATCAC-GAGTGTTTAGATTC  
TGGGGGAGTATGGTCGCAAGTCTGAAACTTAAAGGAATTGACGGAAGGGCACACAATGG  
AGTGGAG-CCTGCGGCTTAATTT-GACTCAACTCGGGAAA-ACTTACCAAGCTAAGATAT  
AATAAGGATTGACAGA-CTAA-AAGATCTTTCATGATTGTATAAGTGGTGGTGCATGGTC  
GTTCTTAG-TTGGTGGAGCAATCTGTCTGGTCAATTCGATAACGGACGAGATCTCGACC  
TGCTAACTAGTAGTACATATTAGCTCAATATGCATGAAAGATTAGTTGGAGTAAGTTGTA  
GGT----CGAAAGG-TTT-----ACAGCACTTCACTGGT----TCGGTAATGTGAATTA  
TATG-GTACGAT-AA---ATAAA---A--CTTCTTAGAGGGACTACCT-GTGGCAAACAG  
GGGG-AAGTTCGAGGCAATAACAGGTCGTGTATGCCCTTAGATACCTT-GGGCCGCACGC  
GCGCTACAATGTAGTACGCAAAAAGCT-----CT----CC--TGGTCCG-AAG---GA  
TT-GGGTAATCAAAA-AATTTACTACGTAACCTGGGATTG-ATCTTTGTAATTATTGATCA  
TCAACGAGGAATTCCTTGTAAAGCGCAAATCATTACTTTGTGCTGAATATGTCCCTGCCCT  
TTGTACACACCGCCCGTCTCCTACCGATCGAATGATACGGTAAAGCCAACAGATTG--  
-GAT-----C-TGTAG--CAA-T-ACAA-----GGTC-TG--AAAG--TTG  
-TT-TAAATCT--C---ATT--GTTT

>AM168051.1\_Raperostelium\_minutum\_71\_2

TCTAAG-TATAAATTTTATA-TATGATGAAA----CTGCAGACGGCTCATT--ACAA--CA  
---GT---AATAAACTA-ATAGACTTTCGG-GTTTTA---TTACCTTTT-GGATAACCG  
CAGTAAATCGGGGCTAATACATACAAT-CG-AGGGG-TGACTGTT-----TAC-G-G-AA  
TCTCCGCGATTATT---A-GCT-TT--CAA-CCAATAC--CCTTCGGGGTTTTG-TGGC  
GAGACCGAATAATATTGCAGATCAAGG-----CTT-CGGCTTTGACAAGTCTATTGT  
GTTACTGCCCTATCAACTTTCGATGGTACGGTATTGGCCTACCATGGTTGTAACGGGTAA  
CGGGGAATTAGGGTTCGATTCGGAGAGGGCGCCTGAGAAATGGCGACCATTCTACGGA  
AGGCAGCAGGCGCGCAAATT-ACTCAATCCCAATAC-GGGGAAGTAGTGACAAGAAATAT  
TAATGCCTATCC--T--TCGGGAAG--GTAATTAATAATGGGTCTAAACTAAATCCATTTT  
CT-AATACAATTGGAGGGCAAGTCTGGTGCAGCAGCGCGGTAATTCAGCTCCAA-TA  
GCATATACTAAATTTGTTGCGGTTAAAA-AGC-TCGTAGTTGAAATTAATAATTACATT-G  
GG-TCAA-----G-GGCTTTAGTTCGATTTTTCGTC-----GGTTTAA-----A  
GCTTCCAATGTATTTTTTTT-TAAAA-TTAACT-CATAATCTTGTTACTTT-----GTA  
ATTCAGGGTTTTTT-----GGGTATTTCACTGTGAGAAAA-TTGTTGGTGTCT  
TAAAGCG--GG-C---GTT--T-TGCTTGATCTTTTGCAGCATGGTATGATAGAACATG  
ACAT---TTTGTGC--GATTGGTT---GCA----TAAAAGTGAATGATTAATAGGGAT  
GGATGGGGGTGTTCAATTGGTGGGCGAGAGGTGAAATTCGTTGACCCTATCAAGATGAA  
CTTCTGCGAAAGCATTACCAAATACTTCCCCATTAATCAAGAACGAAAGTTTGGGGATC  
AAAGACGATCAGATACCGTCGTAGTCCAAACTATAAACTATGTGACCCAGGGATCAGCTA  
AA--AT-TTTACAAAAAATTTAGTTGGCACCTT-GTGAGAAATCAC-GAGTGTTTAGATTC  
TGGGGGAGTATGGTCGCAAGTCTGAAACTTAAAGGAATTGACGGAAGGGCACACAATGG  
AGTGGAG-CCTGCGGCTTAATTT-GACTCAACTCGGGAAA-ACTTACCAAGCTAAGATAT  
AATAAGGATTGACAGA-CTAA-AAGATTTTTCATGATTGTATAAGTGGTGGTGCATGGTC  
GTTCTTAG-TTGGTGGAGCAATCTGTCTGGTCAATTCGATAACGGACGAGATCTCGACC  
TGCTAACTAGTAGTACTTATCAGTTCGATATGCATGAAAGGCTTGTGGAGTAAGTTGTA  
GGT----CGAAAGG-TTT-----ACAACACTTCACTGGT----TCGGTAATGTGAGCAGA  
TAA--GTACGAAAAA---TAAC---A--CTTCTTAGAGGGACTACCT-GTGGCAAACAG  
GGGG-AAGTTCGAGGCAATAACAGGTCGTGTATGCCCTTAGATACCTT-GGGCCGCACGC  
GCGCTACAATGTAGTACGCAAAAAGCT-----AA-----C---TGGTCTGG-GAA---GA  
TT-GGTTAATCATAA--ATTTACTACGTAACCTGGGATTG-ATCTTTGTAATTATTGATCA  
TCAACGAGGAATTCCTTGTAAAGCGCAAATCATTACTTTGTGCTGAATATGTCCCTGCCCT  
TTGTACACACCGCCCGTCTCCTACCGATCGAATGATACGGTAAAGCCAACGGATGA--  
-GAT-----CATGTAG--CAA-T-ACAA-----GGTC-TTA-AAAG--TTG  
-TT-TAAATCT--C---ATT--GTTT

>HQ141493.1\_Raperostelium\_ohioense\_Okla4C

TCTAAG-TATAAATTTTATA-TATGATGAAA----CTGCAGACGGCTCATT--ACAA--CA  
---GT---AATAAACTA-ATAGACTTTCGG-GTTTTA---TTACCTTTT-GGATAACCG  
CAGTAAATCGGGGCTAATACATACAAT-CG-AGGGG-TGACTGTT-----TAC-G-G-AA  
TCTCCGCGATTATT---A-GCT-TT--CAA-CCAATAC--CCTTCG-GGTTTTG-TGGC  
GAGACCGAATAATATTGCAGATCAAGG-----CTT-CGGCTTTGACAAGTCTATTGT  
GTTACTGCCCTATCAACTTTCGATGGTACGGTATTGGCCTACCATGGTTGTAACGGGTAA  
CGGGGAATTAGGGTTCGATTCGGAGAGGGCGCCTGAGAAATGGCGACCATTCTACGGA  
AGGCAGCAGGCGCGCAAATT-ACTCAATCCCAATAC-GGGGAAGTAGTGACAAGAAATAT  
TAATGCCTATCC--T--TCGGGAAG--GTAATTAATAATGGGTCTAAACTAAATCCATTTT  
CT-AATACAATTGGAGGGCAAGTCTGGTGCAGCAGCGGTAATTCAGCTCCAA-TA  
GCATATACTAAATTTGTTGCGGTTAAAA-AGC-TCGTAGTTGAAATTAATAATTACATT-G  
GG-TCAA-----G-GGCTTTAGTTCGATTTTTCGTC-----GGTTTAA-----A  
GCTTCCAATGTATTTTTTTT-TAAAA-TTAACT-CATAATCTTGTTACTTT-----GTA  
ATTCAGGGTTTTTT-----GGGTATTTCACTGTGAGAAAA-TTGTTGGTGTCT  
TAAAGCG--GG-C---GTT--T-TGCTTGATCTTTTGCAGCATGGTATGATAGAACATG  
ACAT---TTTGTGC--GATTGGTT---GCA----TAAAAGTGAATGATTAATAGGGAT  
GGATGGGGGTGTTCAATTGGTGGGCGAGAGGTGAAATTCGTTGACCCTATCAAGATGAA

CTTCTGCGAAAGCATTACCAAATACTTCCCCATTAATCAAGAACGAAAGTTTGGGGATC  
AAAGACGATCAGATACCGTCGTAGTCCAAACTATAAACTATGTCGACCGAGGGATCAGCTA  
AA--AT-TTTACAAAAATTTAGTTGGCACCTT-GTGAGAAATCAC-GAGTGTTTAGATT  
TGGGGGGAGTATGGTCGCAAGTCTGAAACTTAAAGGAATTGACGGAAGGGCACACAATGG  
AGTGGAG-CCTGCGGCTTAATTT-GACTCAACTCGGGAAA-ACTTACCAAGCTAAGATAT  
AATAAGGATTGACAGA-CTAA-AAGATTTTTTCATGATTGTATAAGTGGTGGTGCATGGTC  
GTTCTAAG-TTGGTGGAGCAATCTGTCTGGTCAATTCCGATAACGGACGAGATCTCGACC  
TGCTAACTAGTAGTACTTATCAGTTCGATATGCATGAAAGGCTTGTGGAGTAAGTTGTA  
GGT----CGAAAGG-TTT----ACAACACTTCACCTGGT----TCGGTAATGTGAGCAGA  
TAA--GTACGAAAAA----TAAC---A--CTTCTTAGAGGGACTACCT-GTGGCAAACAG  
GGGG-AAGTTCGAGGCAATAACAGGTCTGTGATGCCCTTAGATACCTT-GGGCCGCACGC  
GCGCTACAATGTAGTACGCAAAAAGCT-----AA-----C---TGGTCTGG-GAA---GA  
TT-GGTTAATCATAA--ATTTACTACGTAACCTGGGATTG-ATCTTTGTAATTATTGATCA  
TCAACGAGGAATTCCTTGTAAAGCGCAAATCATTACTTTGTGCTGAATATGTCCTGCCCCT  
TTGTACACACCGCCCGTCTCCTACCGATCGAATGATACGGTAAAGCCAACGGATGA--  
-GAT-----CATGTAG---CAA-T-ACAAT-----GGTC-TTA-AAAG--TTG  
-TT-TAAATCT--C---ATG--TTTT

>AM168069.1 *Raperostelium potamoides* FP1A

TCTAAG-TATAAATTTTTA-TATGATGAAA----CTGCAGACGGCTCATT--ACAA--CA  
---GT----AATAAACTA-ATAGACTTTCAG-GTTTTA---TTACCTTTT-GGATAACCG  
CAGTAAATCGGGGCTAATACATACAAT-TG-AGGGC-TGACTGTT-----TAC-G-G-GA  
TGTCCGCGATTATT----A-GCA-TT--CAA-CCAATAC--CTCTCGGGGTTTTG-TGGT  
GAAACCGAATAATATTCAGATCGAGG-----CTT-CGGCTTCGACAAGTCTATTGT  
GTTACTGCCCTATCAACTTTCGATGGTACGGTATTGGCCTACCATGGTTGTAACGGGTAA  
CGGGGAATTAGGGTTCGATTCCGGAGAGGGCGCCTGAGAAATGGCGACCACTTCTACGGA  
AGGCAGCAGGCGCGCAAATT-ACTCAATCCCAATAC-GGGGAAGTAGTGACAAGAAATAT  
TAATGCCTATCC--TT-TTAGGAAG--GTAATTAATAATGGGTCTAAACTAAATCCATTTT  
CT-AATACAATTGGAGGGCAAGTCTGGTCCAGCAGCCGCGTAATTCCAGCTCCAA-TA  
GCATATACTAAATTTGTTGCGGTTAAAA-AGC-TCGTAGTTGAAATTAAGCTATATT-G  
GG-TCAA-----G-GGTTCTAGCCGGTTTTACACC-----GGTTTAGT----A  
ACTTCCAGTATATGTTTT-TAAAT-TTTTTCC-CATAAGTTTGGTTACTTTTT-----GTA  
ATTTCAAACGGTTC-----GGTACTTCACTGTGAGAAAA-TTGTGGTGCT  
TAAAGCG--AG-C---GTT--T-TGCTTGATCTTTTGCAGCCTGGTATGATAGAACATG  
ACAT--TTTACGC--TATTGGTT--GCG----TTAGAGTGAATGATTAATAGGGAT  
GGATGGGGGTGTTCAATTTGGTGGGCGAGAGGTGAAATTCGTTGACCCTATCAAGATGAA  
CTTCTGCGAAAGCATTACCAAATACTTCCCCATTAATCAAGAACGAAAGTTTGGGGATC  
AAAGACGATCAGATACCGTCGTAGTCCAAACTATAAACTATGTCGACCAAGGATCAGCTA  
AA--AT-TTTACAAAAATTTAGTTGGCACTTT-GTGAGAAATCAT-GAGTGTTTAGATT  
TGGGGGGAGTATGGTCGCAAGTCTGAAACTTAAAGGAATTGACGGAAGGGCACACAATGG  
AGTGGAG-CCTGCGGCTTAATTT-GACTCAACTCGGGAAA-ACTTACCAAGCTAAGATAT  
AATAAGGATTGACAGA-CTAA-AAGATCTTTCATGATTGTATAAGTGGTGGTGCATGGTC  
GTTCTTAG-TTGGTGGAGCAATCTGTCTGGTCAATTCCGATAACGGACGAGATCTCGACC  
TGCTAACTAGTAGTACATATTAGCTCAATATGCGTGAAAGTTTCGGCGGAGTAAGTTGTA  
GGT----CGAAAGG-TTT----ATGACACTTCACGGGA----TCGGTAACGTGAATTA  
TATT-GTACGATAAAA--AATAAAA--A--CTTCTTAGAGGGACTACCT-GTGGCAAACAG  
GGGG-AAGTTCGAGGCAATAACAGGTCTGTGATGCCCTTAGATACCTT-GGGCCGCACGC  
GCGCTACAATGTAGTACGCAAAAAGCT-----TT-----CC--TGGTCCGG-GAG--GA  
CT-GGGTAATCATTATAATTTACTACGTAACCTGGGATTG-ATCTTTGTAATTATTGATCA  
TCAACGAGGAATTCCTTGTAAAGCGCAAATCATTACTTTGTGCTGAATATGTCCTGCCCCT  
TTGTACACACCGCCCGTCTCCTACCGATCGAATGATACGGTAAAGCCAACAGATGA--  
---A-----TT---TG-GTAG--TAA-T-AC--T-----AAGT-TTA-AAAG--TTG  
-TT-TAAATCT--C---ATT--GTTT

>EU672875.1 *Raperostelium* sp. MR\_2008

TCTA-G-TATAAATTTTTA-TATGATGAAA----CTGCAGACGGCTCATT--ACAA--CA  
---GT----AATAAACTA-ATAGACTTTCAG-GTTTTA---TTACCTTTT-GGATAACCG  
CAGTAAATCGGGGCTAATACATACAAT-TG-AGGGC-TGACTGTT-----TAC-G-G-AA  
TGTCCGCGATTATT----A-GCA-TT--CAA-CCAATAT--CCTCCGGGATTTT-GTGGT  
GAAACCGAATAATATTCAGATCGGAG-----CCT-TGGCTCCGACAAGTCTATTGT  
GTTACTGCCCTATCAACTTTCGATGGTACGGTATTGGCCTACCATGGTTGTAACGGGTAA  
CGGGGAATTAGGGTTCGATTCCGGAGAGGGCGCCTGAGAAATGGCGACCACTTCTACGGA  
AGGCAGCAGGCGCGCAAATT-ACTCAATCCCAATAC-GGGGAAGTAGTGACAAGAAATAT  
TAATGCCTATCC--TT-TTAGGAAG--GTAATTAATAATGGGTCTAAACTAAATCCATTTT  
CT-AATACAATTGGAGGGCAAGTCTGGTCCAGCAGCCGCGTAATTCCAGCTCCAA-TA  
GCATATACTAAATTTGTTGCGGTTAAAA-AGC-TCGTAGTTGAAATTAAGCCATATT-G  
GG-TTAA-----T-GGTTCTAGCCGATTTTACGTC-----GGCCTAG-----G  
ACTTCCAGTATGTTTTT-TAAAT-TTATCC-TATAAGTTTGGTTACTTTTT-----GTA  
ATT-CAGACGATCT-----AGGTGTTTCACTGTGAGAAAA-TTGTGGTGCT  
TAAAGCG--AG-C---GTT--T-TGCTTGATCTTTTGCAGCATGGTATGATAGAACATG  
ACAT--TTTGCGC--TATTGGTT--GCG----TTAAAGTGAATGATTAATAGGGAT  
GGATGGGGGTGTTCAATTTGGTGGGCGAGAGGTGAAATTCGTTGACCCTATCAAGATGAA  
CTTCTGCGAAAGCATTACCAAATACTTCCCAATTAATCAAGAACGAAAGTTTGGGGATC  
AAAGACGATCAGATACCGTCGTAGTCCAAACTATAAACTATGTCGACCAAGGATCAGCTA  
AA--AT-TTTACAAAAATTTAGTTGGCACTTT-GTGAGAAATCAT-GAGTGTTTAGATT



TGGGGGGAGTATGGTCGCAAGTCTGAAACTTAAAGGAATTGACGGAAGGGCACACAATGG  
AGTGGAG-CCTGCGCTTAATTT-GACTCAACTCGGGAAA-ACTTACCAAGCTAAGATAT  
AATAAGGATTGACAGA-CTAA-AAGATCTTTCATGATTGTATAAGTGGTGGTGCATGGTC  
GTTCTTAG-TTGGTGGAGCAATCTGTCTGGTCAATCCGATAACGGACGAGATCTCGACC  
TGCTAACTAGTAGTACATATTAGCTCAATATGCGTGAAAGCTTTGTTGGAGTAAAGTTGTA  
GGT----CGAAAGG-TTT----ATGACACTTCGCTGGG----TCGGTAACGTGAATTA  
TAT--GTACGATAAA--AACAAA--A--CTTCTTAGAGGGACTACCT-GTGGCAAACAG  
GGGG-AAGTTCGAGGCAATAACAGGTCTGTGATGCCCTTAGATACCTT-GGGCCGCACGC  
GCGCTACAATGTAGTACGCAAAAAGCT----AT----CC--TGGTCCGG-GAG--GA  
CT-GGGTAATCATTATAATTTACTACGTAACCTGGGATTG-ATCTTTGTAATTATTGATCA  
TCAACGAGGAATTCCTTGTAAAGCGCAAATCATTACTTTGTGCTGAATATGTCCCTGCCCT  
TTGTACACACCGCCCGTCTCTACCGATCGAATGATACGGTAAAGCCAACAGATGA--  
---A----TT---TG-GTAG---CAA-T-AC--T-----AAGT-TTA-AAAG--TTG  
-TT-TAAATCT--C----AT--GTT-

>HQ141495.1 *Raperostelium ibericum*\_214rjb

TCTA-G-TATAAATTTTATA-TATGATGAAA----CTGCAGACGGCTCATT--ACAA--CA  
---GT---AATAAACTA-ATAGACTTTCAG-GTTTTA---TTACCTTTT-GGATAACCG  
CAGTAAATCGGGGCTAATACATACAAT-TG-AGGGC-TGACTGTT----TAC-G-G-AA  
TGTCCGCGATTATT---A-GCA-TT--CAA-CCAATAT--CCTCCGGGATTTG-TGGT  
GAAACCGAATAATATTGCAGATCGGAG-----CCT-TGGCTCCGACAAGTCTATTGT  
GTTACTGCCCTATCAACTTTCGATGGTACGGTATTGGCCTACCATGGTTGTAACGGGTAA  
CGGGGAATTAGGGTTCGATTCCGGAGAGGGCGCCTGAGAAATGGCGACCACTTCTACGGA  
AGGCAGCAGGCGCGCAAAT-ACTCAATCCCAATAC-GGGGAAGTAGTGACAAGAAATAT  
TAATGCCTATCC--TT-TTAGGAAG--GTAATTAATAATGGGTCTAAACTAAATCCATTTT  
CT-AATACAATTGGAGGGCAAGTCTGGTGCAGCAGCCGCGGTAATTCCAGCTCCAA-TA  
GCATATACTAAATTTGTTGCGGTTAAAA-AGC-TCGTAGTTGAAATTAAGCCATATT-G  
GG-TTAA-----T-GGTCTTAGCCGATTTTACGTC-----GGCCTAG----G  
ACTTCCAGTATGTGTTTTT-TAAAT-TTATCC-TATAAGTTTGGTTACTTTT----GTA  
ATT-CAGACGATCT-----AGGTGTTTCACTGTGAGAAAA-TTGTGGTGTCT  
TAAAGCG--AG-C---GTT--T-TGCTTGATCTTTGCAGCATGGTATGATAGAACATG  
ACAT---TTTGCGC--TATTGGTT---GCG----TTAAAGTGAATGATTAATAGGGAT  
GGATGGGGGTGTTTCATATTGGTGGGCGAGAGGTGAAATTCGTTGACCTATCAAGATGAA  
CTTCTGCGAAAGCATTACCAAAATACTTCCCATAATCAAGAACGAAAGTTTGGGGATC  
AAAGACGATCAGATACCGTCTGATGCCAACTATAAACTATGTCGACCAAGGATCAGCTA  
AA--AT-TTTACAAAAATTTAGTTGGCACTTT-GTGAGAAATCAT-GAGTGTTTAGATT  
TGGGGGGAGTATGGTCGAAAGTCTGAAACTTAAAGGAATTGACGGAAGGGCACACAATGG  
AGTGGAG-CCTGCGCTTAATTT-GACTCAACTCGGGAAA-ACTTACCAAGCTAAGATAT  
AATAAGGATTGACAGA-CTAA-AAGATCTTTCATGATTGTATAAGTGGTGGTGCATGGTC  
GTTCTTAG-TTGGTGGAGCAATCTGTCTGGTCAATCCGATAACGGACGAGATCTCGACC  
TGCTAACTAGTAGTACATATTAGCTCAATATGCGTGAAAGCTTTGTTGGAGTAAAGTTGTA  
GGT----CGAAAGG-TTT----ATGACACTTCGCTGGG----TCGGTAACGTGAATTA  
TAT--GTACGATAAA--AACAAA--A--CTTCTTAGAGGGACTACCT-GTGGCAAACAG  
GGGG-AAGTTCGAGGCAATAACAGGTCTGTGATGCCCTTAGATACCTT-GGGCCGCACGC  
GCGCTACAATGTAGTACGCAAAAAGCT----AT----CC--TGGTCCGG-GAG--GA  
CT-GGGTAATCATTATAATTTACTACGTAACCTGGGATTG-ATCTTTGTAATTATTGATCA  
TCAACGAGGAATTCCTTGTAAAGCGCAAATCATTACTTTGTGCTGAATATGTCCCTGCCCT  
TTGTACACACCGCCCGTCTCTACCGATCGAATGATACGGTAAAGCCAACAGATGA--  
---A----TT---TG-GTAG---CAA-T-AC--T-----AAGT-TTA-AAAG--TTG  
-TT-TAAATCT--C----AT--GTT-

>MN338957.1 *Raperostelium stabile*\_M12A

TCTAAG-TATAAATTTTATA-TATGATGAAA----CTGCAGACGGCTCATT--ACAA--CA  
---GT---AATAAACTA-ATAGACTTTCGG-GTTTTCA---TTACCTTTT-GGATAACCG  
CAGTAAATCGGGGCTAATACATACAAT-CG-AGGGC-TGACTGTT----TAC-G-G-AA  
TGTCCGCGATTATT---A-GTC-TT---AA-CCAGTAC--CCTTCGGGGTTTGTATGGT  
GAAACCGAATAATATTGCAGATCGAAG-----CTT-ACGCTTTGACAAGTCTATTGT  
GTTACTGCCCTATCAACTTTCGATGGTACGGTATTGGCCTACCATGGTTGTAACGGGTAA  
CGGGGAATTAGGGTTCGATTCCGGAGAGGGCGCCTGAGAAATGGCGACCACTTCTACGGA  
AGGCAGCAGGCGCGCAAAT-ACTCAATCCCAATAC-GGGGAAGTAGTGACAAGAAATAT  
TAATGCCTATCC--TT-TTAGGAAG--GTAATTAATAATGGGTCTAAACTAAATCCATTTT  
CT-AATACAATTGGAGGGCAAGTCTGGTGCAGCAGCCGCGGTAATTCCAGCTCCAA-TA  
GCATATACTAAATTTGTTGCGGTTAAAA-AGC-TCGTAGTTGAAAGTTAAAGCCATTATT-G  
GG-TTAA-----TAGGTTTTAGCCGATTTA--TTC-----GGTTTAA-----A  
GCTTCCAATATGTGTTTTT-TAAAT--TAACT-CATGGATTAGGTTACTTTT----GTA  
ATTCTAGTTCTTTT-----GGGTGTTTCACTGTGAGAAAA-TTGTGGTGTCT  
TAAAGCG--GG-C---GTT--T-TGCCTGATCTTTGCAGCATGGTATGATAGAACATG  
ACAT---TTTGCGC--TATTGGTT---GCG----TTAAAGTGAATGATTAATAGGGAT  
GGATGGGGGTGTTTCATATTGGTGGGCGAGAGGTGAAATTCGTTGACCTATCAAGATGAA  
CTTCTGCGAAAGCATTACCAAAATACTTCCCATAATCAAGAACGAAAGTTTGGGGATC  
AAAGACGATCAGATACCGTCTGATGCCAACTATAAACTATGTCGACCAAGGATCAGCTA  
AA--AT-TTTACAAAAATTTAGTTGGCACTTT-GTGAGAAATCAT-GAGTGTTTAGATT  
TGGGGGGAGTATGGTCGAAAGTCTGAAACTTAAAGGAATTGACGGAAGGGCACACAATGG  
AGTGGAG-CCTGCGCTTAATTT-GACTCAACTCGGGAAA-ACTTACCAAGCTAAGATAT  
AATAAGGATTGACAGA-CTAA-AAGATTTTTCATGATTGTATAAGTGGTGGTGCATGGTC

GTTCTTAG-TTGGAGGAGCAATCTGTCTGGTCAATCCGATAACGGACGAGATCTCGACC  
TGCTAACTAGTAGTATATATCGATTTCGATATGCATGAAAGCCTTGTCCGAGTAAGTTGTA  
GGTT---CGCAAGGGTCT----ATGGCACTTCGCTGGG---TCGGTAATGTGAGTTGA  
TAG--GTACGAAAAATTA-----A--CTTCTTAGAGGGACTACCT-GTGGCAAACAG  
GGGG-AAGTTCGAGGCAATAACAGGTCTGTGATGCCCTTAGATACCTT-GGGCCGCACGC  
CGCTACAATGTAGTACGCAAAAAGCA----AT----CC--TGGTCCGG-GAG---GA  
CT-GGGTAATCATAA--ATTTACTACGTAACCTGGGATTG-ATCTTTGTAATTTTTGATCA  
TCAACGAGGAATTCCTTGTAAAGCGCAAATCATTACTTTGTGCTGAATATGTCCCTGCCCT  
TTGTACACACCGCCCGTCTCTACCGATCGAATGATACGGTAAAGCCAACCGATAG--  
-----GC---CA-GTAG---CAA-T-ACA-T-----GGCT-TTA-AAAG--TTG  
-TT-TAAATCT--C----ATT--GTTT

>AM168029.1 Raperostelium australe\_NZ80B

TCTAAG-TATAAATTTTTA-TATGATGAAA---CTGCAGACGGCTCATT--ACAA--CA  
---GT---AATAAACTA-ATAGACTTTCGG-GTTTCA---TTACCTTTT-GGATAACCG  
CAGTAAATCGGGGTAATACATACAAT-CG-AGGGC-TGACTGTT----TAC-G-G-AA  
TGTCCGCGATTATT---A-GCA-TTT--AA-CCAATAC--CCTTCGGGGTTTTG-TGGT  
GAAACCGAATAATATTGCAGATCGAAG-----CTT-CGGCTTCGACAAGTCTATTGT  
GTTACTGCCCTATCAACTTTCGATGGTACGGTATTGGCTACCATGGTTGTAACGGGTAA  
CGGGGAATTAGGTTTCGATTCGGAGAGGGCGCCTGAGAAATGGCGACCATTCTACGGA  
AGGCAGCAGGCGCGCAAATT-ACTCAATCCCAATAC-GGGGAAGTAGTGACAAGAAATAT  
TAATGCCTATCC--TT-TTAGGAAG--GTAATTAATAAATGGGTCTAAACTAAATCCATTTT  
CT-AATACAATTGGAGGGCAAGTCTGGTGCCAGCAGCCGCGGTAATTCCAGCTCCAA-TA  
GCATATACTAAATTTGTTGCGGTTAAAA-AGC-TCGTAGTTGAAGTAAAAACCTTATT-G  
GG-TTAA-----TAGGTCTTAGTCGATTTT-ATC-----GGTTTAA-----G  
GCTTCCAATACGCGTTTTT-TAAAC--TAGCT-CATGGATTAGGTTACTTTTT----GTA  
ATTCTGGTCTTTTT-----GGGTGTTTCACTGTGAGAAAA-TTGTGGTGCT  
TAAAGCG--GG-C---GTT---T-TGCCTGATCTTTGCAGCATGGTATGATAGAACATG  
ACAT---TTTGCGC--TATTGGTT---GCG----TTAAAGTGAATGATTAATAGGGAT  
GGATGGGGGTGTTTCATATTGGTGGGCGAGAGGTGAAATTCGTTGACCCTATCAAGATGAA  
CTTCTGCGAAAGCATTACCAAATACTTCCCATTAATCAAGAACGAAAGTTTGGGGATC  
AAAGACGATCAGATACCGTCTGATGCCAAACTATAAACTATGTGACCAAGGATCAGCTA  
AA--AT-TTTACAAAAATTTAGTTGGCACTTT-GTGAGAAATCAT-GAGTGTTTAGATT  
TGGGGGGAGTATGGTTCGCAAGTCTGAAACTTAAAGGAATTGACGGAAGGGCACACAATGG  
AGTGGAG-CCTGCGGCTTAATTT-GACTCAACTCGGGAAA-ACTTACCAGGCTAAGATAT  
AATAAGGATTGACAGA-CTAA-AAGATCTTTCATGATTGTATAAGTGGTGGTGCATGGTC  
GTTCTTAG-TTGGTGGAGCAATCTGTCTGGTCAATCCGATAACGGACGAGATCTCGACC  
TGCTAACTAGTAGTATATATCGATTTCGATATGCATGAAAGCTTTGTTGGAGTAAAGTTGTA  
GGTT---CGCAAGGGTCT----ATGACACTTCACTGGG---TCGGTAATGTGGGTTGA  
TAA--ATACGAAAAATTA-----A--CTTCTTAGAGGGACTACCT-GTGGCAAACAG  
GGGG-AAGTTCGAGGCAATAACAGGTCTGTGATGCCCTTAGATACCTT-GGGCCGCACGC  
CGCTACAATGTAGTACGCAAAAAGCA----AT----CC--TGGTCCGG-GAG---GA  
CT-GGGTAATCATAA--ATTTACTACGTAACCTGGGATTG-ATCTTTGTAATTTTTGATCA  
TTAACGAGGAATTCCTTGTAAAGCGCAAATCATTACTTTGTGCTGAATATGTCCCTGCCCT  
TTGTACACACCGCCCGTCTCTACCGATCGAATGATACGGTAAAGCCAACCGATGG--  
---A---GT----CA-GTAG---CAA-T-ACA-T-----GACT-CTA-AAAG--TTG  
-TT-TAAATCT--C----ATT--GTTT

>AM168052.1 Raperostelium monochasoides\_HAG653

TCTAAG-TATAAATTTTTA-TATGATGAAA---CTGCAGACGGCTCATT--ACAA--CA  
---GT---AATAAACTA-ATAGACTTTCGG-GTTTCA---TTACCTTTT-GGATAACCG  
CAGTAAATCGGGGTAATACATACAAT-CG-AGGGC-TGACTGTT----TAC-G-G-AA  
TGTCCGCGATTATT---A-GCA-TT--CAA-CCAATAC--CCTTCGGGGTTTTG-TGGT  
GAAACCGAATAATATTGCAGATCGAAG-----CTT-CGGCTTCGACAAGTCTATTGT  
GTTACTGCCCTATCAACTTTCGATGGTACGGTATTGGCTACCATGGTTGTAACGGGTAA  
CGGGGAATTAGGTTTCGATTCGGAGAGGGCGCCTGAGAAATGGCGACCATTCTACGGA  
AGGCAGCAGGCGCGCAAATT-ACTCAATCCCAATAC-GGGGAAGTAGTGACAAGAAATAT  
TAATGCCTATCC--TT-TTAGGAAG--GTAATTAATAAATGGGTCTAAACTAAATCCATTTT  
CT-AATACAATTGGAGGGCAAGTCTGGTGCCAGCAGCCGCGGTAATTCCAGCTCCAA-TA  
GCATATACTAAATTTGTTGCGGTTAAAA-AGC-TCGTAGTTGAATAAAGCCTTATT-G  
GG-TTAA-----TAGGTCTTAGTCGATTTT-ATC-----GGTTTAA-----G  
ACTTCCAATATGTGTTTTT-TAAAT--TAACT-CATGGATTAGGTTACTTTTT----GTA  
ATTCTAGTTCGTTT-----GGGTGTTTCACTGTGAGAAAA-TTGTGGTGCT  
TAAAGCA--GG-C---GTT---T-TGCCTGATCTTTGCAGCATGGTATGATAGAACATG  
ACAT---TTTGCGC--TATTGGTT---GCG----TTAAAGTGAATGATTAATAGGGAT  
GGATGGGGGTGTTTCATATTGGTGGGCGAGAGGTGAAATTCGTTGACCCTATCAAGATGAA  
CTTCTGCGAAAGCATTACCAAATACTTCCCATTAATCAAGAACGAAAGTTTGGGGATC  
AAAGACGATCAGATACCGTCTGATGCCAAACTATAAACTATGTGACCAAGGATCAGCTA  
AA--AT-TTTACAAAAATTTAGTTGGCACTTT-GTGAGAAATCAT-GAGTGTTTAGATT  
TGGGGGGAGTATGGTTCGCAAGTCTGAAACTTAAAGGAATTGACGGAAGGGCACACAATGG  
AGTGGAG-CCTGCGGCTTAATTT-GACTCAACTCGGGAAA-ACTTACCAAGCTAAGATAT  
AATAAGGATTGACAGA-CTAA-AAGATCTTTCATGATTGTATAAGTGGTGGTGCATGGTC  
GTTCTTAG-TTGGTGGAGCAATCTGTCTGGTCAATCCGATAACGGACGAGATCTCGACC  
TGCTAACTAGTAGTATATATCGATTTCGATATGCATGAAAGCTTAGTCCGAGTAAAGTTGTA  
GGTT---CGCAAGGGTCT----ATGGCACTTCGCTGGG---TCGGTAATGTGAGTTGA

TAA--ATACGAAAAATTAaaaaa---A--CTTCTTAGAGGGACTACCT-GTGGCAAAACAG  
GGGG-AAGTTCGAGGCAATAACAGGTCTGTGATGCCCTTAGATACCTT-GGGCCGCACGC  
GCGCTACAATGTAGTACGCAAAAAGCA----TT-----CC--TGGTCCGG-GAG---GA  
CT-GGGTAATCATAA--ATTACTACGTAACCTGGGATTG-ATCTTTGTAATTTTTGATCA  
TCAACGAGGAATTCCTTGTAAAGCGCAAATCATTACTTTGTGCTGAATATGTCCTGCCCCT  
TTGTACACACCGCCCGTCTCTACCGATCGAATGATACGGTAAAGCCAACGGACGG--  
---A---GT-----CA-GTAG---CAA-T-ACA-T-----GACT-CTA-AAAG--TTG  
-TT-TAAATCT--C---GTT--GTTT  
>HQ141492.1\_Raperostelium\_sp\_TH8C\_TH8C  
TCTAAG-TATAAAATTTTA-TATGATGAAA----CTGCAGACGGCTCATT--ACAA--CA  
---GT---AATAAACTA-ATAGACTTTCGG-GTTTCA---TTACCTTTT-GGATAACCG  
CAGTAAATCGGGGCTAATACATACAAT-CG-AGGGC-TGACTGTT-----TAC-G-G-AA  
TGTCCGCGATTATT---A-GCA-TT--CAA-CCAATAC--CTCTCGGGGTTTTG-TGGT  
GAAACCGAATAATATGCAGATCGAAG-----CTT-CGGCTTCGACAAGTCTATTGT  
GTTACTGCCCTATCAACTTTCGATGGTACGGTATTGGCCTACCATGGTTGTAACGGGTAA  
CGGGGAATTAGGGTTCGATTCCGGAGAGGGCGCCTGAGAAATGGCGACCACTTCTACGGA  
AGGCAGCAGGCGCGCAAATT-ACTCAATCCCAATAC-GGGGAAGTAGTGACAAGAAATAT  
TAATGCCTATCC--TT-TAGGAAG--GTAATTAATAATGGGTCTAAACTAAATCCATTTT  
CT-AATACAATTGGAGGGCAAGTCTGGTGCCAGCAGCGCGGTAATCCAGCTCAA-TA  
GCATATACTAAATTTGTTGCGGTTAAAA-AGC-TCGTAGTTGAAATAAAAGCCTTATT-G  
GG-TTAA-----AAGGTCTTAGTCGATTCT--ATC-----GGTTTAA-----G  
GCTTCCAATATGTGTTTTT-TAAAC--TAGCT-CATGGATTAGGTTACTTTT-----GTA  
ATTCTAGTCTTTT-----GGGTGTTTCACTGTGAGAAAA-TTGTGGTGCT  
TAAAGCA--GG-C---GTT---T-TGCTGATCTTTTGCAGCATGGTATGATAGAACATG  
ACAT---TTTGCGC--TATTGGTT--GCG-----TTAAAGTGTAATGATTAATAGGGAT  
GGATGGGGGTGTTCAATTGGTGGGCGAGAGGTGAAATTCGTTGACCCTATCAAGATGAA  
CTTCTGCGAAAGCATTCCCAAACTACTTCCCATTAAATCAAGAACGAAAGTTTGGGGATC  
AAAGCATCAGATACCGTCTAGTCCAAACTATAAACTATGTGACCAAGGATCAGCTA  
AA--AT-TTTACAAAAATTTAGTTGGCACTTT-GTGAGAAATCAT-GAGTGTTTAGATT  
TGGGGGGAGTATGGTTCGCAAGTCTGAACTTAAAGGAATTGACGGAAGGGCACACAATGG  
AGTGGAG-CCTGCGGCTTAATTT-GACTCAACTCGGGAAA-ACTTACCAAGCTAAGATAT  
AATAAGGATTGACAGA-CTAA-AAGATCTTTCATGATTGTATAAGTGGTGGTGCATGGTC  
GTTCTTAG-TTGGTGGAGCAATCTGTCTGGTCAATTCCGATAACGGACGAGATCTCGACC  
TGCTAACTAGTAGTATATATCGATTGATATGCATGAAAGCCTTGTGCGAGTAAAGTTGTA  
GGTT---CGCAAGGTCT---ATGACACTTCGCTGGG---TCGGTAATGTGAGTTGA  
TAA--ATACGAAAAATTAaaaaa---A--CTTCTTAGAGGGACTACCT-GTGGCAAAACAG  
GGGG-AAGTTCGAGGCAATAACAGGTCTGTGATGCCCTTAGATACCTT-GGGCCGCACGC  
GCGCTACAATGTAGTACGCAAAAAGCA----AT-----CC--TGGTCCGG-GAG---GA  
CT-GGGTAATCATAA--ATTACTACGTAACCTGGGATTG-ATCTTTGTAATTTTTGATCA  
TCAACGAGGAATTCCTTGTAAAGCGCAAATCATTACTTTGTGCTGAATATGTCCTGCCCCT  
TTGTACACACCGCCCGTCTCTACCGATCGAATGATACGGTAAAGCCAACGGATGG--  
---A---G-----CA-GTAG---CAA-T-ACG-A-----G-CT-CTA-AAAG--TTG  
-TT-TAAATCT--C---AT---GTT-

>JF892723.1\_Raperostelium\_reciprocatum\_var\_transitum\_OH601  
TCTAAG-TATAAAATTTTA-TATGATGAAA----CTGCAGACGGCTCATT--ACAA--CA  
---GT---AATAAACTA-ATAGACTTTCGG-GTTTCA---TTACCTTTT-GGATAACCG  
CAGTAAATCGGGGCTAATACATACAAT-CG-AGGGC-TGACTGTT-----TAC-G-G-AA  
TGTCCGCGATTATT---A-GCA-TT--CAA-CCAATAC--CTCTCGGGGTTTTG-TGGT  
GAAACCGAATAATATGCAGATCGAAG-----CTT-CGGCTTCGACAAGTCTATTGT  
GTTACTGCCCTATCAACTTTCGATGGTACGGTATTGGCCTACCATGGTTGTAACGGGTAA  
CGGGGAATTAGGGTTCGATTCCGGAGAGGGCGCCTGAGAAATGGCGACCACTTCTACGGA  
AGGCAGCAGGCGCGCAAATT-ACTCAATCCCAATAC-GGGGAAGTAGTGACAAGAAATAT  
TAATGCCTATCC--TC-TAGGAAG--GTAATTAATAATGGGTCTAAACTAAATCCATTTT  
CT-AATACAATTGGAGGGCAAGTCTGGTGCCAGCAGCGCGGTAATCCAGCTCAA-TA  
GCATATACTAAATTTGTTGCGGTTAAAA-AGC-TCGTAGTTGAAGTAAAGCCTTATT-G  
GG-TTAA-----TAGGTCTTAGCCGACTTC--GTC-----GGTTTAA-----G  
GCTTCCAATATGTGTTTTT-TAAAT--TAATT-CATGGATTAGGTTACTTTT-----GTA  
ATTCTAGTCTTTT-----GGGTGTTTCACTGTGAGAAAA-TTGTGGTGCT  
TAAAGCG--GG-C---GTT---T-AGCCTGATCTTTTGCAGCATGGTATGATAGAACATG  
ACAT---TTTGCGC--TATTGGTT--GCG-----TTAAAGTGTAATGATTAATAGGGAT  
GGATGGGGGTGTTCAATTGGTGGGCGAGAGGTGAAATTCGTTGACCCTATCAAGATGAA  
-TTCTGCGAAAGCATTACCAATACTTCCCATTAAATCAAGAACGAAAGTTTGGGGATC  
AAAGCAGATCAGATACCGTCTAGTCCAAACTATAAACTATGTGACCAAGGATCAGCTA  
AA--AT-TTTACAAAAATTTAGTTGGCACTTT-GTGAGAAATCAT-GAGTGTTTAGATT  
TGGGGGGAGTATGGTTCGCAAGTCTGAACTTAAAGGAATTGACGGAAGGGCACACAATGG  
AGTGGAG-CCTGCGGCTTAATTT-GACTCAACTCGGGAAA-ACTTACCAAGCTAAGATAT  
AATAAGGATTGACAGA-CTAA-AAGATCTTTCATGATTGTATAAGTGGTGGTGCATGGTC  
GTTCTTAG-TTGGTGGAGCAATCTGTCTGGTCAATTCCGATAACGGACGAGATCTCGACC  
TGCTAACTAGTAGTATATATCGATTCAATATGCATGAAAGCCTTGTGGAGTAAAGTTGTA  
GGT---CGCAAGG-TCT---ATGACACTTCGCTGGG---TCGGTAATGTGAGTTGA  
TAA--ATACGAAAAATTAaaaaa---A--CTTCTTAGAGGGACTACCT-GTGGCAAAACAG  
GGGG-AAGTTCGAGGCAATAACAGGTCTGTGATGCCCTTAGATACCTT-GGGCCGCACGC  
GCGCTACAATGTAGTACGCAAAAAGCA----AT-----CC--TGGTCCGG-GAG---GA

CT-GGGTAATCATAA--ATTTACTACGTAACCTGGGATTG-ATCTTTGTAATTTTGTATCA  
TCAACGAGGAATTCCTTGTAAGCGCAAATCATTACTTTGTGCTGAATATGTCCCTGCCCT  
TTGTACACACCGCCCGTCGCTCTACCGATCGAATGATACGGTAAAGCCAACAGATGG--  
--A---GT---CA-GTAG---CAA-T-ACA-T-----GACT-TTA-AAAG--TTG  
-TT-TAAATCT--C---ATT--GTT-

>AM168076.1 *Raperostelium tenue* Pan52

TCTAAG-TATAAATTTTAA-TATGATGAAA----CTGCAGACGGCTCATT--ACAA--CA  
---GT---AATAAACTA-ATAGACTTTCGG-GTTTCA---TTACCTTTT-GGATAACCG  
CAGTAAATCGGGGCTAATACATACAAT-CG-AGGGC-TGACTGTT-----TAC-G-G-AA  
TGTCCGCGATTATT---A-GCA-TT--CAA-CCAATAC--CTCTCGGGGTTTTG-TGGT  
GAAACCGAATAATATTGCAGATCGAAG-----CTT-CGGCTTCGACAAGTCTATTGT  
GTTACTGCCCTATCAACTTTCGATGGTACGGTATTGGCCTACCATGGTTGTAACGGGTAA  
CGGGGAATTAGGGTTCGATTCCGGAGAGGGCGCCTGAGAAATGGCGACCATTCTACGGA  
AGGCAGCAGGCGCGCAAAT-ACTCAATCCCAATAC-GGGGAAGTAGTGACAAGAAATAT  
TAATGCCTATCC--TC-TTAGGAAG--GTAATTAATAATGGGTCTAAACTAAATCCATTTT  
CT-AATACAATTGGAGGGCAAGTCTGGTGCCAGCAGCCGCGGTAATTCCAGTCCCAA-TA  
GCATATACTAAATTTGTTGCGGTTAAAA-AGC-TCGTAGTTGAAGTAAAGCCTTATT-G  
GG-TTAA-----TAGGTCTTAGCCGACTTC--GTC-----GGTTAA-----G  
GCTTCCAATATGTGTTTTT-TAAAT--TAATT-CATGGATTAGGTTACTTTTT----GTA  
ATTCTAGTCTTTTT-----GGGTGTTTCACTGTGAGAAAA-TTGTGGTGCT  
TAAAGCG--GG-C---GTT---T-AGCCTGATCTTTTGCAGCATGGTATGATAGAACATG  
ACAT---TTTGCGC--TATTGGTT---GCG----TTAAAGTGTAATGATTAATAGGGAT  
GGATGGGGGTGTTCAATATTGGTGGGCGAGAGGTGAAATTCGTTGACCCTATCAAGATGAA  
CTTCTGCGAAAGCATTACCAAATACTTCCCAATTAATCAAGAACGAAAGTTTGGGGATC  
AAAGACGATCAGATACCGTCGTAGTCCAACTATAAACTATGTGACCAAGGATCAGCTA  
AA--AT-TTTACAAAAATTTAGTTGGCACTTT-GTGAGAAATCAT-GAGTGTTTAGATTTC  
TGGGGGGAGTATGGTTCGAACTGTAAGTCTAAACTTAAAGGAATTGACGGAAGGGCACACAATGG  
AGTGGAG-CCTGCGGCTTAATTT-GACTCAACTCGGGAAA-ACTTACCAAGCTAAGATAT  
AATAAGGATTGACAGA-CTAA-AAGATCTTTCATGATTGTATAAGTGGTGGTGCATGGTC  
GTTCTTAG-TTGGTGGAGCAATCTGTCTGGTCAATCCGATAACGGACGAGATCTCGACC  
TGCTAAGTATGATATATCGATTCAATATGCATGAAAGCCTTGTGGAGTAAAGTTGTA  
GGT---CGCAAGG-TCT----ATGACACTTCGCTGGG---TCGGTAAATGTGAGTTGA  
TAA--ATACGAAAAATTAATAAA---A--CTTCTTAGAGGGACTACCT-GTGGCAAAACAG  
GGGG-AAGTTCGAGGCAATAACAGGTCTGTGATGCCCTTAGATACCTT-GGGCCGCACGC  
GCGCTACAATGTAGTACGCAAAAAGCA----AT----CC--TGGTCCGG-GAG---GA  
CT-GGGTAATCATAA--ATTTACTACGTAACCTGGGATTG-ATCTTTGTAATTTTGTATCA  
TCAACGAGGAATTCCTTGTAAGCGCAAATCATTACTTTGTGCTGAATATGTCCCTGCCCT  
TTGTACACACCGCCCGTCGCTCTACCGATCGAATGATACGGTAAAGCCAACAGATGG--  
--A---GT---CA-GTAG---CAA-T-ACA-T-----GACT-TTA-AAAG--TTG  
-TT-TAAATCT--C---ATT--GTTT

>JF892718.1 *Raperostelium reciprocum* 38A

TCTAAG-TATAAATTTTAA-TATGATGAAA----CTGCAGACGGCTCATT--ACAA--CA  
---GT---AATAAACTA-ATAGACTTTCGG-GTTTCA---TTACCTTTT-GGATAACCG  
CAGTAAATCGGGGCTAATACATACAAT-CG-AGGGC-TGACTGTT-----TAC-G-G-AA  
TGTCCGCGATTATT---A-GCA-TT--CAA-CCAATAC--CTCTCGGGGTTTTG-TGGT  
GAAACCGAATAATATTGCAGATCGAAG-----CTT-CGGCTTCGACAAGTCTATTGT  
GTTACTGCCCTATCAACTTTCGATGGTACGGTATTGGCCTACCATGGTTGTAACGGGTAA  
CGGGGAATTAGGGTTCGATTCCGGAGAGGGCGCCTGAGAAATGGCGACCATTCTACGGA  
AGGCAGCAGGCGCGCAAAT-ACTCAATCCCAATAC-GGGGAAGTAGTGACAAGAAATAT  
TAATGCCTATCC--TC-TTAGGAAG--GTAATTAATAATGGGTCTAAACTAAATCCATTTT  
CT-AATACAATTGGAGGGCAAGTCTGGTGCCAGCAGCCGCGGTAATTCCAGTCCCAA-TA  
GCATATACTAAATTTGTTGCGGTTAAAA-AGC-TCGTAGTTGAAGTAAAGCCTTATT-G  
GG-TTAA-----TAGGTCTTAGCCGACTTC--GTC-----GGTTAA-----G  
GCTTCCAATATGTGTTTTT-TAAAT--TAATT-CATGGATTAGGTTACTTTTT----GTA  
ATTCTAGTCTTTTT-----GGGTGTTTCACTGTGAGAAAA-TTGTGGTGCT  
TAAAGCG--GG-C---GTT---T-AGCCTGATCTTTTGCAGCATGGTATGATAGAACATG  
ACAT---TTTGCGC--TATTGGTT---GCG----TTAAAGTGTAATGATTAATAGGGAT  
GGATGGGGGTGTTCAATATTGGTGGGCGAGAGGTGAAATTCGTTGACCCTATCAAGATGAA  
CTTCTGCGAAAGCATTACCAAATACTTCCCAATTAATCAAGAACGAAAGTTTGGGGATC  
AAAGACGATCAGATACCGTCGTAGTCCAACTATAAACTATGTGACCAAGGATCAGCTA  
AA--AT-TTTACAAAAATTTAGTTGGCACTTT-GTGAGAAATCAT-GAGTGTTTAGATTTC  
TGGGGGGAGTATGGTTCGCAAGTCTGAAACTTAAAGGAATTGACGGAAGGGCACACAATGG  
AGTGGAG-CCTGCGGCTTAATTT-GACTCAACTCGGGAAA-ACTTACCAAGCTAAGATAT  
AATAAGGATTGACAGA-CTAA-AAGATCTTTCATGATTGTATAAGTGGTGGTGCATGGTC  
GTTCTTAG-TTGGTGGAGCAATCTGTCTGGTCAATCCGATAACGGACGAGATCTCGACC  
TGCTAAGTATGATATATCGATTCAATATGCATGAAAGCCTTGTGGAGTAAAGTTGTA  
GGT---CGCAAGG-TCT----ATGACACTTCGCTGGG---TCGGTAAATGTGAGTTGA  
TAA--ATACGAAAAATTAATAAA---A--CTTCTTAGAGGGACTACCT-GTGGCAAAACAG  
GGGG-AAGTTCGAGGCAATAACAGGTCTGTGATGCCCTTAGATACCTT-GGGCCGCACGC  
GCGCTACAATGTAGTACGCAAAAAGCA----AT----CC--TGGTCCGG-GAG---GA  
CT-GGGTAATCATAA--ATTTACTACGTAACCTGGGATTG-ATCTTTGTAATTTTGTATCA  
TCAACGAGGAATTCCTTGTAAGCGCAAATCATTACTTTGTGCTGAATATGTCCCTGCCCT  
TTGTACACACCGCCCGTCGCTCTACCGATCGAATGATACGGTAAAGCCAACAGATGG--

--A---GT----CA-GTAG---CAA-T-ACA-T-----GACT-TTA-AAAAG--TTG  
-TT-TAAATCT--C----ATT--GTT-  
>HQ141490.1 Coremiostelium polycephalum\_Landolt\_#1675\_GUAM  
TCTAAG-TATAAATCTTTA-TACGATGAAA---CTGCAGACGGCTCATT--ACAA--CA  
---GT----GATAAACTA-CTAGACTTTCGG-GTTTCA---CGACCTTTT-GGATAACCG  
CAGTAAATCGGGGCTAATACATATAAA-CG-AAGGG-CGACTGGGC----AACTG-G-AA  
GCTCTGCGATTATT----A-GCT-TTT--TA-CCAATCC--CCGCAAGGGGCCAGTTGGT  
GAGACCAAATAATGCTGCCGATCGAGA-----TCT-AATCT-CGACAAGTCTATTGT  
GTCACCTGCCCTATCAACTTTCGATGGTACGGTATTGGCCTACCATGGTTGTAACGGGTAA  
CGGGGAATCAGGGTTCGATTCCGGAGAGGGAGCCTGAGAAATGGCTACCACTTCTATGGA  
AGGCAGCAGGCGCGCAAATT-ACTCAATCCCAATAC-GGGGAAGTAGTGACAATAAATAT  
CAATGCTCATCTGAT-AAAGGAGG--GCAATTGAAATGAACACAACTAAACCTCTTAA  
TT-AATACAATTGGAGGGCAAGTCTGGTGCCAGCAGCCGCGTAATTCCAGCTCCAA-TA  
GCATATACTAAAGTTGTTGCAGTTAAAA-AGC-TCGTAGTTTAACTAAGGTC-TAGGAG  
GGCTCAA-----TATCACCCTATCGGGCCTT-----GCGTTCAATA-GGG  
GATCCTCTTAGAACTTTTT--AAA-----CTG-CCCATTCTGGCTAGCAAT----AG--  
-C-CCG--G-TTTA-----GGGTGATTCACTGTGAGAAAA-TTGTGGTGT  
CAAAGCA--GG-C---GTC---TC-GCCTGATCCTTTCAGCATGGTATGATAAAACACG  
ACAC--CTAACGCCATATTGGT---GCGA---TATTAAGTGAATGATTAATAGGGAT  
GGATGGGGATGTTTCATATTGGTGGGCGAGAGGTGAAATTCGTTGACCCTATCAAGATGAA  
CTTCTGCGAAAGCATTATCAATACTTCCCCTAATCAAGAACGAAAGTTTGGGGATC  
GAAGACGATCAGATACCGTCGTAGTCCAACTATAAACTATGTGACCCAGGGATCGGCTG  
GA--GT-TTTTTAAAAATCCAGCCGGCATCTT-GTGAGAAATCAC-GAGTGTTAGATT  
CGGGGGGAGTATGGTCCGAACTGAACTTAAAGGAATTGACGGAAGGGCACACAATGG  
AGTGGAG-CCTGCGGCTTAATTT-GACTCAACTCGGGAAA-ACTTACCAAGCTAAGATAT  
AGCTATGATTGACAGA-CTAA-AAGATCTTTCATGATTCTATAAGTGGTGGTGCATGGTC  
GTTCTTAG-TTGGTGGAGCGATTGTTCTGGTCAATTCCGATAACGGACGAGACCTCGACC  
TGCTAACTAGTGGTGTCTATCCTATCGCCATGGGTGATAGTGTAGTTGGGTGTGTT--GTA  
CCA----GCAA--TGGT----GCCGACCCTCGGCTAT----TGTGTAGCCTGATTGGA  
TAGGCATCCAAATC---AAAAA---A--CTTCTTAGAGGGACTACCT-GCCTCAAGCAG  
CGCG-AAGTCCGAGGCAATAACAGGTCTGTGATGCCCTTAGATACCTT-GGGCCGACCG  
GCGCTACATTGCGGATGCGCAAAAAGGT----TG----CC--TGGTCCGG-AAG---GA  
TT-GGGTAATCA--GGAATTCATCACGTAACAGGGATTG-ATCTTTGTAATTATCGATCA  
TCAACGAGGAATTCCTTGTAAAGCGTAAGTCATTACCTTATGCTGAATATGTCCTGCCCT  
TTGTACACACCGCCCGTCTCTACCGATCGAATGATACGGTAAAACCAACGGCATC--  
-----GTTG--GCTTGCCT-A-AAA-CCAGGTC-----AGC-GAT-AATG--TTG  
-TT-TAAACCT--C----ATT--GTT-  
>AM168056.1 Coremiostelium polycephalum\_MY1\_1  
TCTAAG-TATAAATCTTTA-TACGATGAAA---CTGCAGACGGCTCATT--ACAA--CA  
---GT----GATAAACTA-CTAGACTTTCGG-GTTTCA---CGACCTTTT-GGATAACCG  
CAGTAAATCGGGGCTAATACATATAAA-CG-AGGGG-CGACTGGGC----AACTA-G-AA  
ACTCCGCGATTATT----A-GCT-TTT--TA-CCAATCC--CCGCAAGGGGCTAGTTGGT  
GAAACCAAATAATGCTGCCGATCGAGA-----TTT-AATCT-CGACAAGTCTATTGT  
GTCACCTGCCCTATCAACTTTCGATGGTACGGTATTGGCCTACCATGGTTGTAACGGGTAA  
CGGGGAATCAGGGTTCGATTCCGGAGAGGGAGCCTGAGAAATGGCTACCACTTCTATGGA  
AGGCAGCAGGCGCGCAAATT-ACTCAATCCCAATAC-GGGGAAGTAGTGACAATAAATAT  
CAATGCTCATCTGAC-AAAGGAGG--GTAATTGAAATGAACACAACTAAACCTCTTAA  
TT-AATACAATTGGAGGGCAAGTCTGGTGCCAGCAGCCGCGTAATTCCAGCTCCAA-TA  
GCATATACTAAAGTTGTTGCAGTTAAAA-AGC-TCGTAGTTTAAATAAAGGTC-TAGGGG  
GGCTCAA-----TATTTCTATGGGTCTT-----GCATTCAATATGGG  
AATCCCCTTAGAACTTTTT--AAA-----CTG-CCCATTTCAGCCGGGCAAC---CGG-  
-----T-TGTCTT-----GGGTGATTCACTGTGAGAAAA-TTGTGGTGT  
CAAAGCA--GG-C---GTC---TC-GCCTGATCCTTTCAGCATGGTATGATAGAACACG  
ACAC---ATAACGCCACATTGGT---GCGA----TT-AAGTGAATGATTAATAGGGAT  
GGATGGGGATGTTTCATATTGGTGGGCGAGAGGTGAAATTCGTTGACCCTATCAAGATGAA  
CTTCTGCGAAAGCATTATCAATACTTCCCTAATCAAGAACGAAAGTTTGGGGATC  
GAAGACGATCAGATACCGTCGTAGTCCAACTATAAACTATGTGACCCAGGGATCGGCTG  
GA--GT-TCTTTAAAAATCCAGTCCGGACCTT-GTGAGAAATCAC-GAGTGTTAGATT  
CGGGGGGAGTATGGTCCGAACTGAACTTAAAGGAATTGACGGAAGGGCACACAATGG  
AGTGGAG-CCTGCGGCTTAATTT-GACTCAACTCGGGAAA-ACTTACCAAGCTAAGATAT  
AGCTAGGATTGACAGA-CTAA-AAGATCTTTCATGATTCTATAAGTGGTGGTGCATGGTC  
GTTCTTAG-TTGGTGGAGCGATTGTTCTGGTCAATTCCGATAACGGACGAGACCTCGACC  
TGCTAACTAGTGGTGTCTATCCTATCGCCATGGGTGATAGTGTAGTGGTGTGTT--GTA  
GACG---GGCAA---CCGTT---TGCTTCCCTCGCCTGG---TGTGTAGCCTGATTGGA  
TAGGCATCCAAAAAC---AAAAT---A--CTTCTTAGAGGGACTACCT-GCCTCAAGCAG  
CGCG-AAGTCCGAGGCAATAACAGGTCTGTGATGCCCTTAGATACCTT-GGGCCGACCG  
GCGCTACATTGCGATGCGCAAAAAGGT----TG----CC--TGGTCCGG-AAG---GA  
TT-GGGTAATCA--GGAATTCATCACGTAACAGGGATTG-ATCTTTGTAATTATCGATCA  
TCAACGAGGAATTCCTTGTAAAGCGTAAGTCATTACCTTACGCTGAATATGTCCTGCCCT  
TTGTACACACCGCCCGTCTCTACCGATCGAATGATACGGTAAAACCAACGGCATC--  
-----GTTG--GCTGGTTT-A-ATC-GCTAGTC-----T-GT-GAT-AATG--TTG  
-TT-TAAACCT--C----ATT--GTTT  
>HQ141489.1 Coremiostelium polycephalum\_Landolt\_#2132\_B\_9c

TCTAAG-TATAAATCTTTA-TACGATGAAA----CTGCAGACGGCTCATT--ACAA--CA  
---GT---GATAAACTA-CTAGACTTTCGG-GTTTCA---CGACCTTTT-GGATAACCG  
CAGTAAATCGGGGCTAATACATGTAATA-CG-AGGGG-TGACTGGGC----AACTG-G-AA  
GCTCCGCGATTATT---A-GCT-TTT--TA-CCAATCC--CCGCAAGGGGTCAGTTGGT  
GAGACCAAATAATGCTGCCGATCGAGA-----TTT-AATCT-CGACAAGTCTACTGT  
GTCACTGCCATCAACTTTCGATGGTACGGTATTGGCCTACCATGGTTGTAACGGGTAA  
CGGGGAATCAGGGTTCGATTCCGGAGAGGGAGCCTGAGAAAATGGCTACCACCTCTATGGA  
AGGCAGCAGGCGCGCAAATT-ACTCAATCCCAATAC-GGGGAAGTAGTGACAATAAATAT  
CAATGCTCATCTGAC-AAAGGAGG--GTAATTGAAATGAACACAACTAAACCTCTTAA  
TT-AATACAATTGGAGGGCAAGTCTGGTGCAGCAGCCGCGGTAATTCCAGCTCCAA-TA  
GCATATACTAAAAGTTGTTGCAGTTAAAA-AGC-TCGTAGTTTAAAGTAAAGGTC-TAGGGG  
GGCTCAA-----TATTCCTATTGGGTCTC-----GCATTCAATATGGG  
GATCCCTTAGAACTTTTT--AAA----CTG-CCCATTTCAGGCGTCCCGC---AAGG  
GCTCCGCTGGCTTC-----GGGTGATTCACTGTGAGAAAA-TTGTGGTGT  
CAAAGCA--GG-C---GTC---TC-GCCTGATCCTTTCAGCATGGTATGATAAAACACG  
ACAC---CTAACGCCACATTGGTT---GCGA----TT-AAGTGAATGATTAATAGGGAT  
GGATGGGGATGTTATATTGGTGGGCGAGAGGTGAAATTCGTTGACCCTATCAAGATGAA  
CTTCTGCGAAAGCATTATCAAACTTCTCCATTAATCAAGAACGAAAGTTTGGGGATC  
GAAGACGATCAGATACCGTCTGATGCCAACTATAAACTATGTCGACCAGGGATCGGCTG  
GA--GT-TCTTTAAAAATCCAGTCGGCACCTT-GTGAGAAATCAC-GAGTGTTTAGATT  
CGGGGGGAGTATGGTGCAGTCTGAACTTAAAGGAATTGACGGAAGGGCACACAATGG  
AGTGGAG-CCTGCGGCTTAATTT-GACTCAACTCGGGAAA-ACTTACCAAGCTAAGATAT  
AGCTAGGATTGACAGA-CTAA-AAGATCTTTCATGATTCTATAAGTGGTGGTGCATGGTC  
GTTCTTAG-TTGGTGGAGCGATTTGTCTGGTCAATTCCGATAACGGACGACCTCGACC  
TGCTAACTAGTGGTGTCTATCCTATCGCCATGGGTGATAGTTAGCTGGGTGTCTGG-CTC  
GCTC---GCAA--GAGCG----GGTCTGCCTCGGCTGG---CGTGTAGCTGATTGGA  
TAGGCATCCAAAAAC---AAAA---A-CTTCTTAGAGGGACTACCT-GCCTCAAGCAG  
CGGG-AAGTCCGAGGCAATAACAGGTCTGTGATGCCCTTAGATACCTT-GGGCCGACGC  
GCGCTACATTGCGATGCGCAAAAAGGT-----TG-----CC--TGGTCCGG-AAG---GA  
TT-GGGTAATCA--GGAATTCATCACGTAACAGGGATTG-ATCTTGTAAATATCGATCA  
TCAACGAGGAATTCCTTGTAAAGCGTAAGTCATTACCTTACGCTGAATATGTCCTGCCC  
TTGTACACACCGCCCTCGCTCCTACCGATCGAATGATACGGTAAACCAACGGCATT--  
-----GCTG--GCTGGCTT-A-AAC-TCTGGTC-----TAGC-GAT-AATG--TTG  
-TT-TAAACCT--C---ATT--GTT-

>HQ141488.1 Coremiostelium polycephalum\_Landolt\_#1130\_SS3B

TCTAAG-TATAAATCTTTA-TACGATGAAA----CTGCAGACGGCTCATT--ACAA--CA  
---GT---GATAAACTA-CTAGACTTTCGG-GTTTCA---CGACCTTTT-GGATAACCG  
CAGTAAATCGGGGCTAATACATGTAATA-CG-AGGGG-TGACTGGGC----AACTG-G-AA  
GCTCCGCGATTATT---A-GCT-TTT--TA-CCAATCC--CCGCAAGGGGTCAGTTGGT  
GAGACCAAATAATGCTGCCGATCGAGA-----TCT-AATCT-CGACAAGTCTACTGT  
GACTACCCCTATCAACTTTCGATGGTACGGTATTGGCCTACCATGGTTGTAACGGGTAA  
CGGGGAATCAGGGTTCGATTCCGGAGAGGGAGCCTGAGAAAATGGCTACCACCTCTATGGA  
AGGCAGCAGGCGCGCAAATT-ACTCAATCCCAATAC-GGGGAAGTAGTGACAATAAATAT  
CAATGCTCATCTGAT-AAAGGAGG--GTAATTGAAATGAACACAACTAAACCTCTTAA  
TT-AATACAATTGGAGGGCAAGTCTGGTGCAGCAGCCGCGTAATTCCAGCTCCAA-TA  
GCATATACTAAAAGTTGTTGCAGTTAAAA-AGC-TCGTAGTTTAAAGTAAAGGTC-TAGGGG  
GGCTCAA-----TATTCCTATTGGGTCTC-----GCATTCAATACGGG  
GATCCCTCAGAATTTTT--AAA----CTG-CCCATTTCAGGCG-CTCGC---GC--  
-----TCTGACTC-----GGGTGATTCACTGTGAGAAAA-TTGTGGTGT  
CAAAGCA--GG-C---GTC---TC-GCCTGATCCTTTCAGCATGGTATGATAGAACACG  
ACAC---CTAACGCCACATTGGTT---GCGA----TT-AAGTGAATGATTAATAGGGAT  
GGATGGGGATGTTATATTGGTGGGCGAGAGGTGAAATTCGTTGACCCTATCAAGATGAA  
CTTCTGCGAAAGCATTATCAAACTTCTCCATTAATCAAGAACGAAAGTTTGGGGATC  
GAAGACGATCAGATACCGTCTGATGCCAACTATAAACTATGTCGACCAGGGATCGGCTG  
GA--GT-TCTTTAAAAATCCAGTCGGCACCTT-GTGAGAAATCAC-GAGTGTTTAGATT  
CGGGGGGAGTATGGTGCAGTCTGAACTTAAAGGAATTGACGGAAGGGCACACAATGG  
AGTGGAG-CCTGCGGCTTAATTT-GACTCAACTCGGGAAA-ACTTACCAAGCTAAGATAT  
AGCTAGGATTGACAGA-CTAA-AAGATCTTTCATGATTCTATAAGTGGTGGTGCATGGTC  
GTTCTTAG-TTGGTGGAGCGATTTGTCTGGTCAATTCCGATAACGGACGAGACCTCGACC  
TGCTAACTAGTGGTGTCTATCCTATCGCCATGGGTGATAGCCAGATGGGTGTGTT--TTC  
GTTC---AGCAA--TGAGC---GGGATCCCTCGCCTGG---TGTGTAGCTGATTGGA  
TAGGCATCCAAAAAC---AAAA-----CTTCTTAGAGGGACTACCT-GCCTCAAGCAG  
GCGG-AAGTCCGAGGCAATAACAGGTCTGTGATGCCCTTAGATACCTT-GGGCCGACGC  
GCGCTACATTGCGATGCGCAAAAAGGT-----TG-----CC--TGGTCCGG-AAG---GA  
TT-GGGTAATCA--GGAATTCATCACGTAACAGGGATTG-ATCTTGTAAATATCGATCA  
TCAACGAGGAATTCCTTGTAAAGCGTAAGTCATTACCTTACGCTGAATATGTCCTGCCC  
TTGTACACACCGCCCTCGCTCCTACCGATCGAATGATACGGTAAACCAACGGCATT--  
-----GCTG--GCTGGCTT-A-ACC-TCTGGTC-----TAGC-GAT-AATG--TTG  
-TT-TAAACCT--C---ATT--GTT-

>JX173877.1 Polysphondylium fuscans\_Sweden\_11D

TCTAAG-TATAAATCTTTG-TACGATGAAA----CTGCAGACGGCTCATT--ACAA--CA  
---GT---GATAAACTA-ATAGACTTTCGG-GTTTT-----ACCT-TTTGGATAACCG  
CAGTAAATCGGGGCTAATACATACAAG-CG-AGGGG-TGATTGATT---TATC-A-A-GA

GCTCCGCGATTATT---A-GCA-TT--CAA-CCAATAC--CCGCAAGGGTCTGTGGT  
GAAACCGAATAATATTGCAGATCGAAG-----ATT-TATCTTCGACAAGTCTACTGT  
GTACTGCCCTATCAACTTTCGATGGTACGGTATTGGCCTACCATGGTTGTAACGGGTAA  
CGGGGAATTAGGGTTCGATTCCGGAGAGGGAGCCTGAGAAATGGCTACCACTTCTACGGA  
AGGCAGCAGGCGCGCAAATT-ACTCAATCCCAATAC-GGGGAAGTAGTGACAATAAATAT  
CGATGCCTAACCAATTT-TTGAAGG--GTAATTGAAATGAACACAAATTAACCTTTAA  
TT-AATACAATTGGAGGGCAAGTCTGGTGCCAGCAGCCGCGTAATTCCAGCTCCAA-TA  
GCATATACTAAAGTTGTTGCAGTTAAAA-AGC-TCGTAGTTGAAGTTAAAGCTTTATTTG  
GG-TTAA-----AAATTCATTTA-CCGTTA-----T-TGGTTAAATC---G  
AATTCAGTATTGCTTTTT-T-----AAAG-TTCAGTTTGTATTGCCT-----TG  
GTAGTATTTATTTG-----GACATTTCACTGTGAGAAAA-TTGTGGTGTT  
TAAAGCA--GG-C---GTC---TCTGCCTGATCTTTTGCAGCATGGTATGATGGAACATG  
ACAT--TTTGCGC--AATTGGTT--GCG----ATTAAGTGTAAATGATTAATAGGGAT  
GGATGGGGGTGTTTCATATTGGTGGCGAGAGGTGAAATTCGTTGACCCTATCAAGATGAA  
CTTCTGCGAAAAGCATTACCAAAATACTTCCCATAATCAAGAACGAAAGTTTGGGGATC  
GAAGACGATCAGATACCGTCGTAGTCCAAACTATAAACTATGTGACCAGGGATCGGTAA  
AA--AC-TTTTTAAAAGTTTAATCGGCACCTT-GTGAGAAATCAC-GAGTGTTAGATT  
CGGGGGGAGTATGGTCGCAAGTCTGAACTTAAAGGAATTGACGGAAGGGCACACAATGG  
AGTGGAG-CCTGCGGCTTAATTT-GACTCAACTCGGGAAA-ACTTACCAAGCTAAGATAT  
AGTAAGGATTGACAGA-CTAA-GAGATCTTTCATGATTCTATAAGTGGTGGTGCATGGTC  
GTTCTTAG-TTGGTGGAGCGATTTGTCTGGTCAATTCCGATAACGGACGAGACCTCGACC  
TGCTAAGTAGTATTTATTG-GCCGTTATGGATGATAGTCATT-CGGGGTTTGG-AAG  
GGCT---TC--GGTCTG---TCC--GCTTCGTGTGG---TGTGTAATCTGGTCGGA  
TAG--GTACGAATTA-----AA---A--CTTCTAGAGGGACTACCT-GCCTCAAGCAG  
GCGG-AAGTCCGAGGCAATAACAGGTCTGTGATGCCCTTAGATACCTT-GGGCCGCACGC  
GCGCTACAATGTAGAAAAGCAAAAAGGT----TCC-----TGGTCCGG-AAG--GA  
TT-GGGTAATCAATTGAAATTTTCTACGTAACCTGGGATTG-ATCTTTGTAATTATTGATCA  
TCAACGAGGAATTCCTTGTAAAGCGTAAGTCATTACCTTATGCTGAATATGTCCTGCCCT  
TTGTACACACCGCCCGTCTCTACCGATCGAATGATACGGTAAAGCCAACGGATAA--  
-----GGTC--CTATTGGG-C-AAC-CAGTATG-----GATT-TTA-AAAG--TTG  
-TT-TAAATCT-C----ATT--GTT-

>HQ141487.1 Polysphondylium\_sp.\_Tibet\_10A

TCTA-G-TATAAATCTTG-TACGATGAAA----CTGCAGACGGCTCATT--ACAA--CA  
---GT---GATAAACTA-ATAGACTTTCGG-GTTTT-----ACCT-TTTGGATAACCG  
CAGTAAATCGGGGTAATACATACAAG-CG-AGGGG-TGATTGATT---TATC-A-A-GA  
GCTCCGCGATTATT---A-GCA-TT--CAA-CCAATAC--CCGCAAGGGTCTGTGGT  
GAAACCGAATAATATTGCAGATCGAAG-----ATT-TATCTTCGACAAGTCTACTGT  
GTCACTGCCCTATCAACTTTCGATGGTACGGTATTGGCCTACCATGGTTGTAACGGGTAA  
CGGGGAATTAGGGTTCGATTCCGGAGAGGGAGCCTGAGAAATGGCTACCACTTCTACGGA  
AGGCAGCAGGCGCGCAAATT-ACTCAATCCCAATAC-GGGGAAGTAGTGACAATAAATAT  
CGATGCCTAACCAATTT-TTGAAGG--GTAATTGAAATGAACACAAATTAACCTTTAA  
TT-AATACAATTGGAGGGCAAGTCTGGTGCCAGCAGCCGCGTAATTCCAGCTCCAA-TA  
GCATATACTAAAGTTGTTGCAGTTAAAA-AGC-TCGTAGTTGAAGTTAAAGCTTTATTTG  
GG-TTAA-----AAATTCATTTA-CCGTTA-----T-TGGTTAAATC---G  
AATTCAGTATTGCTTTTT-T-----AAAG-TTCAGTTTGTATTGCCT-----TG  
GTAGTATTTATTTG-----GACATTTCACTGTGAGAAAA-TTGTGGTGTT  
TAAAGCA--GG-C---GTC---TCTGCCTGATCTTTTGCAGCATGGTATGATGGAACATG  
ACAT--TTTGCGC--AATTGGTT--GCG----ATTAAGTGTAAATGATTAATAGGGAT  
GGATGGGGGTGTTTCATATTGGTGGCGAGAGGTGAAATTCGTTGACCCTATCAAGATGAA  
CTTCTGCGAAAAGCATTACCAAAATACTTCCCATAATCAAGAACGAAAGTTTGGGGATC  
GAAGACGATCAGATACCGTCGTAGTCCAAACTATAAACTATGTGACCAGGGATCGGTAA  
AA--AC-TTTTTAAAAGTTTAATCGGCACCTT-GTGAGAAATCAC-GAGTGTTAGATT  
CGGGGGGAGTATGGTCGCAAGTCTGAACTTAAAGGAATTGACGGAAGGGCACACAATGG  
AGTGGAG-CCTGCGGCTTAATTT-GACTCAACTCGGGAAA-ACTTACCAAGCTAAGATAT  
AGTAAGGATTGACAGA-CTAA-GAGATCTTTCATGATTCTATAAGTGGTGGTGCATGGTC  
GTTCTTAG-TTGGTGGAGCGATTTGTCTGGTCAATTCCGATAACGGACGAGACCTCGACC  
TGCTAAGTAGTATTTATTG-GCCGTTATGGATGATAGTCATT-CGGGGTTAGG-AAG  
GGCT---TC--GGTCTC---TCC--GCTTCGTGTGG---TGTGTAATCTGGTCGGA  
TAG--GTACGAATTA-----AA---A--CTTCTAGAGGGACTACCT-GCCTCAAGCAG  
GCGG-AAGTCCGAGGCAATAACAGGTCTGTGATGCCCTTAGATACCTT-GGGCCGCACGC  
GCGCTACAATGTAGAAAAGCAAAAAGGT----TCC-----TGGTCCGG-AAG--GA  
TT-GGGTAATCAATTGAAATTTTCTACGTAACCTGGGATTG-ATCTTTGTAATTATTGATCA  
TCAACGAGGAATTCCTTGTAAAGCGTAAGTCATTACCTTATGCTGAATATGTCCTGCCCT  
TTGTACACACCGCCCGTCTCTACCGATCGAATGATACGGTAAAGCCAACGGATAA--  
-----GGTC--CTATTGGG-C-AAC-CAGTATG-----GATT-TTA-AAAG--TTG  
-TT-TAAATCT-C----ATT--GTT-

>AM168046.1 Polysphondylium\_laterosorum\_AE4

TCTAAG-TATAAATCTTG-TACGATGAAA----CTGCAGACGGCTCATT--ACAA--CA  
---GT---GATAAACTA-ATAGACTTTCGG-GTTTT-----ACCT-TTTGGATAACCG  
CAGTAAATCGGGGTAATACATAGAAG-CG-AGGGG-TGACTGATT---TATC-G-G-AA  
GCTCCGCGATTATT---A-GCA-TT--CAA-CCAATAC--CCGCAAGGGTCTGTGGT  
GAAACCGAATAATATTGCAGATCGAAG-----ATT-TATCTTCGACAAGTCTACTGT  
GTCACTGCCCTATCAACTTTCGATGGTACGGTATTGGCCTACCATGGTTGTAACGGGTAA

CGGGGAATTAGGGTTCGATTCCGGAGAGGGAGCCTGAGAAATGGCTACCACCTTCTACGGA  
AGGCAGCAGGCGCGCAAATT-ACCTAATCCCAATAC-GGGGAAGTAGTGACAATAAATAT  
CGATGCCTATCCATTT-ATGGAAGG-GTAATTGAAATGAACACAAATTAATACTCTTAA  
TT-AATACAATTGGAGGGCAAGTCTGGTGCCAGCAGCCGCGTAATTCCAGCTCCAA-TA  
GCATATACTAAAGTTGTTGCAGTTAAAA-AGC-TCGTAGTTGAAGTTAAAGCTTTATTTG  
GG-TTAA-----AAATCATTG-CCTTTTT-----T-TGGTTAAATA---G  
AATTCAGTATTGCTTTT-T-----AAAG-TTCAGTTTGTAGTACTTT-----  
GTATTACTTATTG-----GACATTTCACTGTGAGAAAA-TTGTGGTGTT  
TAAAGCA--GG-C---GTC---TCTGCCTGATCTTTTGCAGCATGGTATGATGGAACATG  
ACAT---TTTGCGC--AATTGGTT--GCG----ATTAAAGTGTAATGATTAATAGGGAT  
GGATGGGGGTGTTTCATATTGGTGGGCGAGAGGTGAAATTCGTTGACCCTATCAAGATGAA  
CTTCTGCGAAAGCATTACCAAAATACTTCCCATAATCAAGAACGAAAGTTTGGGGATC  
GAAGACGATCAGATACCGTCTGATGCCAAACTATAAACTATGTCGACCAGGGATCGGTAA  
AA--AC-TTTTTAAAAGTTTAACTCGGCACCTT-GTGAGAAATCAC-GAGTGTTTAGATTC  
CGGGGGGAGTATGGTTCGAAAGTCTGAAACTTAAAGGAATTGACGGAAGGGCACACAATGG  
AGTGGAG-CCTGCGGCTTAATTT-GACTCAACTCGGAAAA-ACTTACCAAGCTAAGATAT  
AGTAAGGATTGACAGA-CTAA-GAGATCTTTCATGATTCTATAAGTGGTGGTGCATGGTC  
GTTCTTAG-TTGGTGGAGCGATTGTCTGGTCAATCCGATAACGGACGAGACCTCGACC  
TGCTAACTAGTAGTATTTATTG-GCCGTTATGGATGATAGCTATTTCGGGGTTGG-AAG  
GTCT---TC--GGATCTC---TCC--GCTTCGTGTGG---TGTGTAATCTGGTCGGA  
TAG--GTACGAATTA-----AA---A--CTTCTAGAGGGACTACCT-GCCTCAAGCAG  
GCGG-AAGTCCGAGGCAATAACAGGTCTGTGATGCCCTTAGATACCTT-GGGCCGCACGC  
GCGCTACAATGTAGAAAGCAAAAAGGT----TCC-----TGGTCCGG-AAG---GA  
TT-GGGTAATCAATTTTCTACGTAACCTGGGATTG-ATCTTTGTAATTATTGATCA  
TCAACGAGGAATTCCTTGTAAAGCGTAAGTCATTACCTTATGCTGAATATGTCCCTGCCCT  
TTGTACACACCGCCGTCGCTCTACCGATCGAATGATACGGTAAAGCCAACGGATAA--  
-----GATC--CTATTGGG-C-AAC-TAATACG-----GATT-TTA-AAAG--TTG  
-TT-TAAATCT--C----ATT--GTTT

>AM168108.1 Polysphondylium violaceum P6

TCTAAG--ATAAAT-CTTG-TACGATGAAA----CTGCAGACGGCTCATT--ACAA--CA  
---GT---GATAAACTA-ATAGACTTTTCGG-GTTTT-----ACCNCNTTGGAAAACCG  
CAGTAAATCGGGGTAATACATAGAAG-CG-AGGGG-TGACTGATT--TATC-G-G-AA  
GCTCCGCGATTATT----A-GCA-TT--CAA-CCAATAC--CCGCAAGGGTTCTGTTGGT  
GAAACCGAATAATATTGCAGATCGAAG-----ATT-TATCTTCGACAAGTCTACTGT  
GTCACTGCCCTATCAACTTTCGATGGTACGGTATTGGCCTACCATGGTTGTAACGGGTAA  
CGGGGAATTAGGGTTCGATTCCGGAGAGGGAGCCTGAGAAATGGCTACCACCTTCTACGGA  
AGGCAGCAGGCGCGCAAATT-ACTCAATCCCAATAC-GGGGAAGTAGTGACAATAAATAT  
CGATGCCTATCCATTT-TTGAAGG--GTAATTGAAATGAACACAAATTAATACTCTTAA  
TT-AATACAATTGGAGGGCAAGTCTGGTGCCAGCAGCCGCGTAATTCCAGCTCCAA-TA  
GCATATACTAAAGTTGTTGCAGTTAAAA-AGC-TCGTAGTTGAAGTTAAAGCTTTATTTG  
GG-TTAA-----AAATCATTG-CCTTTTT-----A-CGGTTAAAT---G  
GATTCCAGTATTGCTTCT-T-----AAAG-TTCAGTTTGTATTGCCTT-----TG  
GTAGTATTTATTG-----GACATTTCACTGTGAGAAAA-TTGTGGTGTT  
TAAAGCA--GG-C---GTC---TCTGTCTGATCTTTTGCAGCATGGTATGATGGAACATG  
ACAT---TTTGCGC--AATTGGTT--GCG----ATTAAAGTGTAATGATTAATAGGGAT  
GGATGGGGGTGTTTCATATTGGTGGGCGAGAGGTGAAATTCGTTGACCCTATCAAGATGAA  
CTTCTGCGAAAGCATTACCAAAATACTTCCCATAATCAAGAACGAAAGTTTGGGGATC  
GAAGACGATCAGATACCGTCTGATGCCAAACTATAAACTATGTCGACCAGGGATCGGTAA  
AA--AC-TTTTTAAAAGTTTAACTCGGCACCTT-GTGAGAAATCAC-GAGTGTTTAGATTC  
CGGGGGGAGTATGGTTCGAAAGTCTGAAACTTAAAGGAATTGACGGAAGGGCACACAATGG  
AGTGGAG-CCTGCGGCTTAATTT-GACTCAACTCGGAAAA-ACTTACCAAGCTAAGATAT  
AGTAAGGATTGACAGA-CTAA-GAGATCTTTCATGATTCTATAAGTGGTGGTGCATGGTC  
GTTCTTAG-TTGGTGGAGCGATTGTCTGGTCAATCCGATAACGGACGAGACCTCGACC  
TGCTAACTAGTAGTATTTATTG-GCCGTTATGGATGATAGCTATT-CGGGGTTTGG-AAG  
GGCT---TC--GGTCTC---TCC--GCTTCGTGTGG---TGTGTAATCTGGTCGGA  
TAG--GTACGAATTA-----AA---A--CTTCTAGAGGGACTACCT-GCCTCAAGCAG  
GCGG-AAGTCCGAGGCAATAACAGGTCTGTGATGCCCTTAGATACCTT-GGGCCGCACGC  
GCGCTACAATGTAGAAAGCAAAAAGGT----TCC-----TGGTCCGG-AAG---GA  
TT-GGGTAATCAATTTTCTACGTAACCTGGGATTG-ATCTTTGTAATTATTGATCA  
TCAACGAGGAATTCCTTGTAAAGCGTAAGTCATTACCTTATGCTGAATATGTCCCTGCCCT  
TTGTACACACCGCCGTCGCTCTACCGATCGAATGATACGGTAAAGCCAACGGATAA--  
-----GATC--CTATTGGG-C-AAC-TAATACG-----GATT-TTA-AAAG--TTG  
-TT-TAAATCT--C----ATT--GTTT

>HQ141486.1 Polysphondylium violaceum 209

TCTA-G-TATAAATCTTG-TACGATGAAA----CTGCAGACGGCTCATT--ACAA--CA  
---GT---GATAAACTA-ATAGACTTTTCGG-GTTTT-----ACCT-TTTGGATAACCG  
CAGTAAATCGGGGTAATACATAGAAG-CG-AGGGG-TGACTGATT--TATC-G-G-AA  
GCTCCGCGATTATT----A-GCA-TT--CAA-CCAATAC--CCGCAAGGGTTCTGTTGGT  
GAAACCGAATAATATTGCAGATCGAAG-----ATT-TATCTTCGACAAGTCTACTGT  
GTCACTGCCCTATCAACTTTCGATGGTACGGTATTGGCCTACCATGGTTGTAACGGGTAA  
CGGGGAATTAGGGTTCGATTCCGGAGAGGGAGCCTGAGAAATGGCTACCACCTTCTACGGA  
AGGCAGCAGGCGCGCAAATT-ACTCAATCCCAATAC-GGGGAAGTAGTGACAATAAATAT  
CGATGCCTATCCATTT-TTGAAGG--GTAATTGAAATGAACACAAATTAATACTCTTAA



TT-AATACAATTGGAGGGCAAGTCTGGTGCCAGCAGCCGCGGTAATTCAGCTCCAA-TA  
GCATATACTAAAGTTGTTGCAGTTAAAA-AGC-TCGTAGTTGAAGTTAAAGCTTTATTTG  
GG-TTAA-----AAATCCATTTG-CCTTTTA-----A-CGGTTAAATT---G  
GATTCCAGTATTGCTTTTT-T-----AAAG-TTCAGTTTGTATTGCCT-----TG  
GTAGTATTTATTTG-----GACATTTCACTGTGAGAAAA-TTGTGGTGTT  
TAAAGCA--GG-C---GTC---TCTGTCTGATCTTTTGCAGCATGGTATGATGGAACATG  
ACAT---TTGCGC--AATTGGTT---GCG---ATTAAGTGTAAATGATTAATAGGGAT  
GGATGGGGGTGTTCAATTGGTGGGCGAGAGGTGAAATTCGTTGACCCTATCAAGATGAA  
CTTCTGCGAAAGCATTACCAAATACTTCCCCATTAATCAAGAACGAAAGTTTGGGGATC  
GAAGACGATCAGATACCGTCGTAGTCCAAACTATAAACTATGTGACCCAGGGATCGGTTA  
AA--AC-TTTTTAAAAAGTTAATCGGCACCTT-GTGAGAAATCAC-GAGTGTTTAGATT  
CGGGGGGAGTATGGTCGCAAGTCTGAAACTTAAAGGAATTGACGGAAGGGCACACAATGG  
AGTGGAG-CCTGCGGCTTAATTT-GACTCAACTCGGGAAA-ACTTACCAAGCTAAGATAT  
AGTAAGGATTGACAGA-CTAA-GAGATCTTTCATGATTCTATAAGTGGTGGTGCATGGTC  
GTTCTTAG-TTGGTGGAGCGATTTGTCTGGTCAATTCCGATAACGACGAGACCTCGACC  
TGCTAACTAGTAGTATTTATTG-GCCGTTATGGATGATAGCTATT-CGGGGTTTGG-AAG  
GGCT---TC--GGTCTC---TCC--GCTTCGTGTGG---TGTGTAATCTGGTCGGA  
TAG--GTACGAATTA-----AA---A--CTTCTAGAGGGACTACCT-CCCTCAAGCAG  
GCGG-AAGTCCGAGGCAATAACAGGTCTGTGATGCCCTTAGATACCTT-GGGCCGACGC  
GCGCTACAATGTAGAAAGCAAAAAGGT----TCC-----TGGTCCGG-AAG---GA  
TT-GGGTAATCAATTGAATTTTCTACGTAACCTGGGATTG-ATCTTTGTAATTATTGATCA  
TCAACGAGGAATTCCTTGTAAAGCGTAAGTCATTACCTTATGCTGAATATGTCCTGCCCT  
TTGTACACACCCCGCTCGCTCCTACCGATCGAATGATACGGTAAAGCCAACGGATAA--  
-----GATC--CTATTGGG-C-AAC-TAATATG-----GATT-TTA-AAAG--TTG  
-TT-TAAATCT--C---ATT--GTTT

>HQ141485.1\_Polysphondylium sp. Laos4 Laos4

TCTAAG-TATAAATCTTG-TACGATGAAA---CTGCAGACGGCTCATT--ACAA--CA  
--TGT---GATAAACTA-ATAGACTTTTCGG-GTTTT-----ACCT-TTTGGATAACCG  
CAGTAAATCGGGGCTAATACATAGAAG-CG-AGGGG-TGACTGATT---TATC-G-G-AA  
GCTCCGCGATTATT---A-GCA-TT--CAA-CCAATAC--CCGCAAGGGTCTGTTGGT  
GAAACCGAATAATATTGACATCGAAG-----ATT-TATCTTCGACAAGTCTACTGT  
GTCAGTCCCTCAACTTTCGATGGTACGGTATTGGCCTACCATGGTGTAAACGGGTAA  
CGGGAATTAGGGTTCGATTCCGGAGAGGGAGCCTGAGAAATGGCTACCCTTCTACGGA  
AGGCAGCAGGCGCGCAAATT-ACTCAATCCCAATAC-GGGGAAGTAGTGACAATAAATAT  
CGATGCCTATCCATTT-ATGGAAGG--GTAATTGAAATGAACACAAATTAACCTCTAA  
TT-AATACAATTGGAGGGCAAGTCTGGTCCAGCAGCCGCGGTAATTCAGCTCCAA-TA  
GCATATACTAAAGTTGTTGCAGTTAAAA-AGC-TCGTAGTTGAAGTTAAAGCTTTATTTG  
GG-TTAA-----AAATCCATTTG-CCTTTTA-----A-CGGTTAAATA---G  
GATTCCAGTATTGCTTTTT-T-----AAAG-TTCAGTTTGTATTGCCT-----TG  
GTAGTATTTATTTG-----GACATTTCACTGTGAGAAAA-TTGTGGTGTT  
TAAAGCA--GG-C---GTC---TCTGTCTGATCTTTTGCAGCATGGTATGATGGAACATG  
ACAT---TTGCGC--AATTGGTT---GCG---ATTAAGTGTAAATGATTAATAGGGAT  
GGATGGGGGTGTTCAATTGGTGGGCGAGAGGTGAAATTCGTTGACCCTATCAAGATGAA  
CTTCTGCGAAAGCATTACCAAATACTTCCCCATTAATCAAGAACGAAAGTTTGGGGATC  
GAAGACGATCAGATACCGTCGTAGTCCAGACTATAAACTATGTGACCCAGGGATCGGTTA  
AA--AC-TTTTTAAAAAGTTAATCGGCACCTT-GTGAGAAATCAC-GAGTGTTTAGATT  
CGGGGGGAGTATGGTCGCAAGTCTGAAACTTAAAGGAATTGACGGAAGGGCACACAATGG  
AGTGGAG-CCTGCGGCTTAATTT-GACTCAACTCGGGAAA-ACTTACCAAGCTAAGATAT  
AGTAAGGATTGACAGA-CTAA-GAGATCTTTCATGATTCTATAAGTGGTGGTGCATGGTC  
GTTCTTAG-TTGGTGGAGCGATTTGTCTGGTCAATTCCGATAACGACGAGACCTCGACC  
TGCTAACTAGTAGTATTTATTG-GCCGTTATGGATGATAGCTATT-CGGGGTTTGG-AAG  
GGTT---TC--GGTCTC---TCC--GCTTCGTGTGG---TGTGTAATCTGGTCGGA  
TAG--GTACGAATTA-----AA---A--CTTCTAGAGGGACTACCT-CCCTCAAGCAG  
GCGG-AAGTCCGAGGCAATAACAGGTCTGTGATGCCCTTAGATACCTT-GGGCCGACGC  
GCGCTACAATGTAGAAAGCAAAAAGGT----TCC-----TGGTCCGG-AAG---GA  
TT-GGGTAATCAATTGAATTTTCTACGTAACCTGGGATTG-ATCTTTGTAATTATTGATCA  
TCAACGAGGAATTCCTTGTAAAGCGTAAGTCATTACCTTATGCTGAATATGTCCTGCCCT  
TTGTACACACCCCGCTCGCTCCTACCGATCGAATGATACGGTAAAGCCAACGGATGA--  
-----G-TC--CTATTGGG-C-AAC-CAATATG-----GATT-TTA-AAAG--TTG  
-TT-TAAATCT--C---ATT--GTT-

>GQ496156.1\_Polysphondylium patagonicum

TCTAAG-TATAAATCTTG-TACGATGAAA---CTGCAGACGGCTCATT--ACAA--CA  
---GT---GATAAACTA-ATAGACTTTTCGG-GTTTT-----ACCT-TTTGGATAACCG  
CAGTAAATCGGGGCTAATACATACAAG-CG-AGGGG-TGACTGATT---TATC-G-G-AA  
GCTCCGCGATTATT---A-GCA-TT--CAA-CCAATAC--CCGCAAGGGTCTGTTGGT  
GAAACCGAATAATATTGACATCGAAG-----ATT-TATCTTCGACAAGTCTACTGT  
GTCAGTCCCTCAACTTTCGATGGTACGGTATTGGCCTACCATGGTGTAAACGGGTAA  
CGGGGAATTAGGGTTCGATTCCGGAGAGGGAGCCTGAGAAATGGCTACCCTTCTACGGA  
AGGCAGCAGGCGCGCAAATT-ACTCAATCCCAATAC-GGGGAAGTAGTGACAATAAATAT  
CGATGCCTATCCATTT--TGGAAGG--GTAATTGAAATGAACACAAATTAACCTCTAA  
TT-AATACAATTGGAGGGCAAGTCTGGTCCAGCAGCCGCGGTAATTCAGCTCCAA-TA  
GCATATACTAAAGTTGTTGCAGTTAAAA-AGC-TCGTAGTTGAAGTTAAAGCTTTATTTG  
GG-TTAA-----AAATCCATTTT-GCCTATA-----CGGTTAATA---G

GATTCAGTATTGCTTTTT-T-----AAAG-TTCAGTTTGTATTGCCTT-----TG  
GTAGTATTTATTG-----GACATTTCACTGTGAGAAAA-TTGTGGTGTT  
TAAAGCA--GG-C---GTC---TCTGTCTGATCTTTTGCAGCATGGTATGATGGAACATG  
ACAT---TTTGCGC--AATTGGTT--GCG----ATTAAGTGTAAATGATTAATAGGGAT  
GGATGGGGGTGTTTCATATTGGTGGGCGAGAGGTGAAATTCGTTGACCCTATCAAGATGAA  
CTTCTGCGAAAGCATTCCCAATACTTCCCCTAATCAAGAACGAAAGTTTGGGGATC  
GAAAGCATCAGATACCGTCTAGTCCAAACTATAAACTATGTCGACCAGGGATCGGTTA  
AA--AC-TTTTTAAAAGTTTAAATCGGCACCTT-GTGAGAAATCAC-GAGTGTTAGATT  
CGGGGGGAGTATGGTCGCAAGTCTGAACTTAAAGGAATTGACGGAAGGGCACACAATGG  
AGTGGAG-CCTGCGGCTTAATTT-GACTCAACTCGGGAAA-ACTTACCAAGCTAAGATAT  
AGTAAGGATTGACAGA-CTAA-GAGATCTTTCATGATTCTATAAGTGGTGGTGCATGGTC  
GTTCTTAG-TTGGTGGAGCGATTTGTCTGGTCAATTCCGATAACGGACGAGACCTCGACC  
TGCTAACTAGTAGTATTTATTG-GCCGTTATGGATGATAGCTATT-CGGGGTTTGG-AAG  
GTT---TC--GGCTCTC---TCC-GCTTCGTGTGG---TGTGTAATCTGGTCGGA  
TAG--GTACGAATTA-----AA---A--CTTCTAGAGGGACTACCT-GCCTCAAGCAG  
GCGG-AAGTCCGAGGCAATAACAGGTCTGTGATGCCCTTAGATACCTT-GGGCCGCACGC  
GCGCTACAATGTAGAAAGCAAAAAGGT-----TCC-----TGGTCCGG-AAG---GA  
TT-GGGTAATCAATTGAATTTTCTACGTAACCTGGGATTG-ATCTTTGTAATTATTGATCA  
TCAACGAGGAATTCCTGTAAGCTAAGTCATTACCTTATGCTGAATATGTCCTGCCCT  
TTGTACACACCGCCGCTCCTACCGATCGAATGATACGGTAAAGTAAACGGATAA--  
-----GATC--CTATTGGG-C-AAC-TAATATG-----GATT-TTA-AAAG--TTG  
-TT-TAAATCT--C---ATT--GTT-

>AM168041.1 Dictyostelium firmibasis TNS\_C\_14

TCTAAG-TATAAATCTTG-TACGATGAAA----CTGCAGACGGCTCATT--ACAA--CA  
---GT---GATAAACTA-ATAGACTTTCGG-GTTTT-----ACCTTTT-GGATAACCG  
CAGTAAATCGGGGCTAATACATACAAG-CG-ATGGG-CGACTGGC-----AAC-G-G-AA  
GCTCAGCGATTATT---A-GCA-TT--CTA-CCAATGC--CTTC--GGGTTTTG--GGT  
GAGACCGAATAATTTGCAGATCGAGG-----ATT-TATCTTCGACAAGTCTACTGT  
GTCCTGCCCTATCAACTTTCGATGGTACGGTATTGGCCTACCATGGTTGTAACGGGTAA  
CGGGGAATTAGGGTTCGATTCCGGAGAGGGAGCCTGAGAAATGGCTACCACTTCTACGGA  
AGGCAGCAGGCGCGCAAAAT-ACTCAATCCCAATAC-GGGGAAGTAGTGACAATAAATAT  
CAATGCTTATCC--TT-TTTGGAGG--GCAATTGAAATGAACACAAATTAATACTTTAA  
TT-AACACAATTGGAGGGCAAGTCTGGTGCCAGCAGCCGCGTAATTCCAGCTCCAA-TA  
GCATATACTAAAGTTGTTGCAGTAAAA-AGC-TCGTAGTTGAAGTAAAGGTTTATT-G  
GG-TAAA-----CGTCGTTG-TCACTTC-----G-TGATTAAC---T  
GACTCCAGTATCTCTT-C-TT-----AATAG-TTCAGCTTTCGTTATCTT-----TG  
ATAGCGGTTGTTG-----GACATTTCACTGTGAGAAAA-TTGTGGTGTT  
TAAAGCA--GG-C---GTC---TC-GCCTGATCTTTTGCAGCATGGTATGATGAAACATG  
ACAT---TTTACGC--TATTGGTT--GCG----TCTAAAGTGTAAATGATTAATAGGGAT  
GGATGGGGGTGTTTCATATTGGTGGGCGAGAGGTGAAATTCGTTGACCCTATCAAGATGAA  
CTTCTGCGAAAGCATTCCCAATACTTCCCCTAATCAAGAACGAAAGTTTGGGGATC  
GAAGACGATCAGATACCGTCTAGTCCAACTATAAACTATGTCGACCAGGGATCGGTTA  
AA--AT-TTTTTAAAATTTAATCGGCACCTT-GTGAGAAATCAC-GAGTGTTAGATT  
CGGGGGGAGTATGGTCGCAAGTCTGAACTTAAAGGAATTGACGGAAGGGCACACAATGG  
AGTGGAG-CCTGCGGCTTAATTT-GACTCAACTCGGGAAA-ACTTACCAAGCTAAGATAT  
AGTAAGGATTGACAGA-CTAA-AAGATCTTTCATGATTCTATAAGTGGTGGTGCATGGTC  
GTTCTTAG-TTGGTGGAGCGATTTGTCTGGTCAATTCCGATAACGGACGAGACCTCGACC  
TGCTAACTAGTAGTATTTATTA-GTCGATATAGGCGATAGCTTTTCTGGGGTTTGG-AAT  
GATT---TC--GGTCATC---TCC-GGCTTCAAGGAG---TGTGATCTGACTCGA  
TAG--GTACGAATTT--AAAAA-----CTTCTAGAGGGACTACCT-GCCTCAAGCAG  
GCGG-AAGTCCGAGGCAATAACAGGTCTGTGATGCCCTTAGATACCTT-GGGCCGCACGC  
GCGCTACAATGTAGGAAACAAAAAGGC-----TCC-----TGGTCCGG-AAG---GA  
TT-GGGTAATCATTGAAATTTCTACGTAACCTGGGATTG-ATCTTTGTAATTATTGATCA  
TAAACGAGGAATTCCTGTAAGCATAAAGTCATTACCTTATGCTGAATATGTCCTGCCCT  
TTGTACACACCGCCGCTCCTACCGATCGAATGATACGGTAAAGTAAACGGATCG--  
-----TTTT--ATCTGTGG-C-AAC-ACTGATA-----TAAA-TTA-AAAG--TTA  
-TT-TAAATCT--C---ATT--GTTT

>AM168071.1 Dictyostelium discoideum NC4

TCTAAG-TATAAATCTTG-TACGATGAAA----CTGCAGACGGCTCATT--ACAA--CA  
---GT---GATAAACTA-ATAGACTTTCGG-GTTTT-----ACCTTTT-GGATAACCG  
CAGTAAATCGGGGCTAATACATACAAG-CG-ATGGG-TGACTGGC-----AAC-G-G-AA  
GCTCAGCGATTATT---A-GCA-TT--CTA-CCAATGC--CTTC--GGGTTTTG--GGT  
GATACCGAATAATATTGCAGATCGAGG-----ATT-TATCTTCGACAAGTCTACTGT  
GTCCTGCCCTATCAACTTTCGATGGTACGGTATTGGCCTACCATGGTTGTAACGGGTAA  
CGGGGAATTAGGGTTCGATTCCGGAGAGGGAGCCTGAGAAATGGCTACCACTTCTACGGA  
AGGCAGCAGGCGCGCAAAAT-ACTCAATCCCAATAC-GGGGAAGTAGTGACAATAAATAT  
CAATACCTATCC--TT-TTTGGAGG--GCAATTGAAATGAACACAAATTAATACTTTAA  
TT-AACACAATTGGAGGGCAAGTCTGGTGCCAGCAGCCGCGTAATTCCAGCTCCAA-TA  
GCATATACTAAAGTTGTTGCAGTAAAA-AGC-TCGTAGTTGAAGTAAAGGTTTACC-G  
GG-TTAA-----TGCTATTA-CCACTTC-----G-TGGTAAAT---C  
GACACCGTATCTCTT-C-TT-----AATAG-TTCAGCTTGTATTATCTT-----TG  
ATAGTGTGTTGTTG-----GACATTTCACTGTGAGAAAA-TTGTGGTGTT  
TAAAGCA--GG-C---GTC---TC-GCCTGATCTTTTGCAGCATGGTATGATGAAACATG

ACAT---TTTACGC--TATTGGTTT--GCG----TTTAAAGTGAATGATTAATAGGGAT  
GGATGGGGGTGTTTCATATTGGTGGGCGAGAGGTGAAATTCGTTGACCCTATCAAGATGAA  
CTTCTGCGAAAAGCATTACCAAAATACTTCCCATTAAATCAAGAACGAAAAGTTTGGGGATC  
GAAGACGATCAGATACCGTCGTAGTCCAAACTATAAACTATGTGACCAGGGATCGGTTA  
AA--AT-TTTTTAAAAATTTAATCGGCACCTT-GTGAGAAATCAT-GAGTGTTTAGATTCT  
CGGGGGGAGTATGGTTCGCAAGTCTGAACTTAAAGGAATTGACGGAAGGGCACACAATGG  
AGTGGAG-CCTGCGGCTTAATTT-GACTCAACTCGGGAAA-ACTTACCAAGCTAAGATAT  
AGTAAGGATTGACAGA-CTAA-AAGATCTTTCATGATTCTATAAGTGGTGGTGCATGGTC  
GTTCTTAG-TTGGTGGAGCGATTTGTCTGGTCAATTCCGATAACGACGAGACCTCGACC  
TGCTAACTAGTAGTATTTATTA-GTCGATATAGACGATAGCTTTTCTGGGGTTTGG-AAT  
GATT----TC--GGTCATC----TCC-TGCTTCAAGGAG----TGTGTAGTCTGACTCGA  
TAG--GTACGAATTA---A--AA-----CTTCTTAGAGGGACTACCT-GCCTCAAGCAG  
GCGG-AAGTCCGAGGCAATAACAGGTCTGTGATGCCCTTAGATACCTT-GGGCCGCACGC  
GCGCTACAATGTAGGAAAACAAAAGGC-----TCC-----TGGTCCGG-AAG---GA  
TT-GGGTAATCATTTGAATTTCTACGTAACCTGGGCTTG-ATCTTTGTAATTATTGATCA  
TAAACGAGGAATTCCTTGTAAGCGTAAGTCATTACCTTATGCTGAATATGTCCTGCCCT  
TTGTACACACCGCCCGTCTCTACCGATCGAATGATACGGTAAAGTTAACGGATCG--  
-----TTTT--ATCTGTGG-C-AAC-ACTGATA-----TAAA-TTA-AAAAG--TTA  
-TT-TAAATCT--C----ATT--GTTT

>AM168038.1 Dictyostelium dimigraformum\_AR5b

TCTAAG-TATAAATCTTG-TACGATGAAA----CTGCAGACGGCTCATT--ACAA--CA  
---GT---GATAAACTA-ATAGACTTTCGG-GTTTT-----ACCTTTT-GGATAACCG  
CAGTAAATCGGGGCTAATACATACAAG-CG-ATGGG-TGACTGGC-----AAC-G-G-AA  
GCTCAGCGATTATT---A-GCA-TT--CTA-CCAATAC--CTTC--GGGTTTTG--GGT  
GAGACCGAATAATATTGCAGATCGAGG-----ATT-TATCTTCGACAAGTCTACTGT  
GTCACTGCCCTATCAACTTTCGATGGTACGGTATTGGCCTACCATGGTTGTAACGGGTAA  
CGGGGAATTAGGGTTCGATTCGGAGAGGGAGCCTGAGAAATGGCTACCCTTCTACGGA  
AGGCAGCAGGCGCGCAAATT-ACTCAATCCCAATAC-GGGGAAGTAGTGACAATAAATAT  
CAATACCTATCC--TT-TTTGGAGG--GCAATTGAAATGAACACAAATTAAGAACTCTTAA  
TT-AACACAATTGGAGGGCAAGTCTGGTGCCAGCAGCCGCGGTAAATCCAGCTCCAA-TA  
GCATATACTAAAGTTGTTGTCAGTTAAAA-AGC-TCGTAGTTGAAGTTTAAAGTTTACT-G  
GG-TTTT-----ATGTGA-TTG-TCACTC-----G-TGATTAA-----T  
CACACCAGTATCTCTTT-C-TT-----AATAG-TTCAGCTTGTATTATCTT-----TG  
ATAGTGCTTGTGTTG-----GACATTTCACTGTGAGAAAA-TTGTGGTGT  
TAAAGCA--GG-C---GTC---TC-GCCTGATCTTTGTCAGCATGGTATGATGAAACATG  
ACAT---TTTACGC--TATTGGTTT--GCG----TTTAAAGTGAATGATTAATAGGGAT  
GGATGGGGGTGTTTCATATTGGTGGGCGAGAGGTGAAATTCCTTGACCCTATCAAGATGAA  
CTTCTGCGAAAAGCATTACCAAAATACTTCCCATTAAATCAAGAACGAAAAGTTTGGGGATC  
GAAGACGATCAGATACCGTCGTAGTCCAAACTATAAACTATGTGACCAGGGATCGGTTA  
AA--AT-TTTTTAAAAATTTAATCGGCACCTT-GTGAGAAATCAT-GAGTGTTTAGATTCT  
CGGGGGGAGTATGGTTCGCAAGTCTGAACTTAAAGGAATTGACGGAAGGGCACACAATGG  
AGTGGAG-CCTGCGGCTTAATTT-GACTCAACTCGGGAAA-ACTTACCAAGCTAAGATAT  
AGTAAGGATTGACAGA-CTAA-AAGATCTTTCATGATTCTATAAGTGGTGGTGCATGGTC  
GTTCTTAG-TTGGTGGAGCGATTTGTCTGGTCAATTCCGATAACGACGAGACCTCGACC  
TGCTAACTAGTAGTATTTATTA-GTCGATATGGACGATAGCTTTTCTGGGGTTTGG-AAT  
GATT----TC--GGTCATC----TCC-TGCTTCAAGGAG----TGTGTAGTCTGACTCGA  
TAG--GTACGAATTA---A--AA-----CTTCTTAGAGGGACTACCT-GCCTCAAGCAG  
GCGG-AAGTCCGAGGCAATAACAGGTCTGTGATGCCCTTAGATACCTT-GGGCCGCACGC  
GCGCTACAATGTAGGAAAACAAAAGGC-----TCC-----TGGTCCGG-AAG---GA  
TT-GGGTAATCATTTGAATTTCTACGTAACCTGGGCTTG-ATCTTTGTAATTATTGATCA  
TAAACGAGGAATTCCTTGTAAGCGTAAGTCATTACCTTATGCTGAATATGTCCTGCCCT  
TTGTACACACCGCCCGTCTCTACCGATCGAATGATACGGTAAAGTTAACGGATCG--  
-----TTTT--ATCTGTGG-C-AAC-ACTGATA-----TAAA-TTA-AAAAG--TTA  
-TT-TAAATCT--C----ATT--GTTT

>AM168033.1 Dictyostelium citrinum\_OH494

TCTAAG-TATAAATCTTG-TACGATGAAA----CTGCAGACGGCTCATT--ACAA--CA  
---GT---GATAAACTA-ATAGACTTTCGG-GTTTT-----ACCTTTT-GGATAACCG  
CAGTAAATCGGGGCTAATACATACAAG-CG-ATGGG-TGACTGGC-----AAC-G-G-AA  
GCTCAGCGATTATT---A-GCG-TT--CTA-CCAATAC--CTTC--GGGTTTTG--GGT  
GAGACCGAATAATATTGCAGATCGAGG-----ATT-TATCTTCGACAAGTCTACTGT  
GTCACTGCCCTATCAACTTTCGATGGTACGGTATTGGCCTACCATGGTTGTAACGGGTAA  
CGGGGAATTAGGGTTCGATTCGGAGAGGGAGCCTGAGAAATGGCTACCCTTCTACGGA  
AGGCAGCAGGCGCGCAAATT-ACTCAATCCCAATAC-GGGGAAGTAGTGACAATAAATAT  
CAATACCTATCC--TT-TTTGGAGG--GCAATTGAAATGAACACAAATTAAGAACTCTTAA  
TT-AACACAATTGGAGGGCAAGTCTGGTGCCAGCAGCCGCGGTAAATCCAGCTCCAA-TA  
GCATATACTAAAGTTGTTGTCAGTTAAAA-AGC-TCGTAGTTGAAGTTTAAAGTTTACT-G  
GG-TTAA-----TGTCGTTG-TCACTTTT-----G-TGGCCAAAC----T  
GACACCAGTATCTCTTT-C-TT-----AATAG-TTCAGCTTGCATTATCTT-----TG  
ATAGTGCTTGTGTTG-----GACATTTCACTGTGAGAAAA-TTGTGGTGT  
TAAAGCA--GG-C---GTC---TC-GCCTGATCTTTGTCAGCATGGTATGATGAAACATG  
ACAT---TTTACGC--TATTGGTTT--GCG----TTTAAAGTGAATGATTAATAGGGAT  
GGATGGGGGTGTTTCATATTGGTGGGCGAGAGGTGAAATTCGTTGACCCTATCAAGATGAA  
CTTCTGCGAAAAGCATTACCAAAATACTTCCCATTAAATCAAGAACGAAAAGTTTGGGGATC

GAAGACGATCAGACACCGCTCGTAGTCCAAAATAAACTATGTCGACCAGGGATCGGTTA  
AA--AT-TTTTTTAAAATTTAATCGGCACCTT-GTGAGAAATCAT-GAGTGTTTAGATTC  
CGGGGGGAGTATGGTCGCAAGTCTGAACTTAAAGGAATTGACGGAAGGGCACACAATGG  
AGTGGAG-CCTGCGGCTTAATTT-GACTCAACTCGGGAAA-ACTTACCAAGCTAAGATAT  
AGTAAGGATTGACAGA-CTAA-AAGATCTTTCATGATTCTATAAAGTGGTGGTGCATGGTC  
GTTCTTAG-TTGGTGGAGCGATTTGCTGGTCAATTCCGATAACGGACGAGACCTCGACC  
TGCTAACTAGTAGTATTATTA-GTCGATATGGACGATAGCTTCTCTGGGGTTGG-AAT  
GATT----TC--GGTCATC----TCC-TGCTTCAAGGAG----TGTGTAGTCTGACTTGA  
TAG--GTACGAATCA---A-AA-----CTTCTTAGAGGGGACTACCT-GCCTCAAGCAG  
GCGG-AAGTCCGAGGCAATAACAGGTCTGTGATGCCCTTAAATACCTT-GGGCCGCACGC  
GCGCTACAATGTAGGAAACAAAAAGGC-----TCC-----TGGTCCGG-AAG---GA  
TT-GGGTAATCATTGAATTTCTACGTAACCTGGGCTTG-ATCTTTGTAATTATTGATCA  
TAAACGAGGAATTCCTTGTAAAGCGTAAGTCATTACCTTATGCTGAATATGTCCTGCCCCT  
TTGTACACACCGCCCGCTCGCTCTACCGATCGAATGATACGGTAAAGTTAACGGATCG--  
-----TTTT--ATCTGTGG-C-AAC-ACTGATA-----TAAA-TTA-AAAG--TTA  
-TT-TAAATCT--C----ATT--GTTT

>AM168039.1 Dictyostelium discoideum\_V34

TCTAAG-TATAAATCTTG-TACGATGAAA----CTGCAGACGGCTCATT--ACAA--CA  
---GT---GATAAACTA-ATAGACTTTCGG-GTTTT-----ACCTTTT-GGATAACCG  
CAGTAAATCGGGGCTAATACATACAAG-CG-ATGGG-TGACTGGC-----AAC-G-G-AA  
GCTCAGCGATTATT---A-GCA-TT--CTA-CCAATGC--CTTC--GGGTTTTG--GGT  
GAGACCGAATAATATTGCAGATCGAGG-----ATT-TATCTTCGACAAGTCTACTGT  
GTCACTGCCCTATCAACTTTCGATGGTACGGTATTGGCCTACCATGGTTGTAACGGGTAA  
CGGGGAATTAGGGTTCGATTCGGAGAGGGAGCCTGAGAAAATGGCTACCACTTCTACGGA  
AGGCAGCAGGCGCGCAAATT-ACTCAATCCCAATAC-GGGGAAGTAGTGACAATAAATAT  
CAATACCTATCC--TT-TTTGGAGG--GCAATTGAAATGAACACAAATTAATACTTTAA  
TT-AACACAATTGGAGGGCAAGTCTGGTCCAGCAGCCGCGGTAATCCAGCTCCAA-TA  
GCATATACTAAAGTTGTTGCAGTTAAAA-AGC-TCGTAGTTGAAGTTAAAGGTTACT-G  
GG-TTTA-----TGTCGTTG-TCACTTTT-----G-TGGT-AAAC----T  
GACACCAGTATCTCTTT-C-TT----AATAG-TTCAGCTTACATTATCTT-----TG  
ATAGTGGTTGTTG-----GACATTTCACTGTGAGAAAA-TTGTGGTGT  
TAAAGCA--GG-C---GTC---TC-GCCTGATCTTTTCAGCATGGTATGATGAAACATG  
ACAT--TTTACGC--TATTGGTTT--GCG----TTTAAAGTGAATGATTAATAGGGAT  
GGATGGGGGTGTTCAATTGGTGGGCGAGAGGTGAAATTCGTTGACCCTATCAAGATGAA  
CTTCTGCGAAAGCATTACCAAATACTTCCCATTAAATCAAGAACGAAAGTTTGGGGATC  
GAAGACGATCAGATACCGTGTAGTCCAACTATAAACTATGTCGACCAGGGATCGGTTA  
AA--AT-TTTTTTAAAATTTAATCGGCACCTT-GTGAGAAATCAT-GAGTGTTTAGATTC  
CGGGGGGAGTATGGTCGCAAGTCTGAACTTAAAGGAATTGACGGAAGGGCACACAATGG  
AGTGGAG-CCTGCGGCTTAATTT-GACTCAACTCGGGAAA-ACTTACCAAGCTAAGATAT  
AGTAAGGATTGACAGA-CTAA-AAGATCTTTCATGATTCTATAAAGTGGTGGTGCATGGTC  
GTTCTTAG-TTGGTGGAGCGATTTGCTGGTCAATTCCGATAACGGACGAGACCTCGACC  
TGCTAACTAGTAGTATTTATTA-GTCGATATGGACGATAGCTTCTCTGGGGTTGG-AAT  
GATT----TC--GGTCATC----TCC-TGCTTCAAGGAG----TGTGTAGTCTGACTTGA  
TAG--GTACGAATTA---A-AA-----CTTCTTAGAGGGGACTACCT-GCCTCAAGCAG  
GCGG-AAGTCCGAGGCAATAACAGGTCTGTGATGCCCTTAGATACCTT-GGGCCGCACGC  
GCGCTACAATGTAGGAAACAAAAAGGC-----TCC-----TGGTCCGG-AAG---GA  
TT-GGGTAATCATTGAATTTCTACGTAACCTGGGCTTG-ATCTTTGTAATTATTGATCA  
TAAACGAGGAATTCCTTGTAAAGCGTAAGTCATTACCTTATGCTGAATATGTCCTGCCCCT  
TTGTACACACCGCCCGCTCGCTCTACCGATCGAATGATACGGTAAAGTTAACGGATCG--  
-----TTTT--ATCTGTGG-C-AAC-ACTGATA-----TAAA-TTA-AAAG--TTA  
-TT-TAAATCT--C----ATT--GTTT

>AM168044.1 Dictyostelium intermedium\_PJ11

TCTAAG-TATAAATCTTG-TACGATGAAA----CTGCAGACGGCTCATT--ACAA--CA  
---GT---GATAAACTA-ATAGACTTTCGG-GTTTT-----ACCTTTT-GGATAACCC  
CAGTAAATCGGGGCTAATACATACAAG-CG-ATGGG-TGACTGGT-----AAC-G-G-AA  
GCTCAGCGATTATT---A-GCA-TT--CTA-CCAATAC--CTTC--GGGTTTTG--GGT  
GAGACCGAATAATATTGCAGATCGAGG-----ATT-TATCTTCGACAAGTCTACTGT  
GTCACTGCCCTATCAACTTTCGATGGTACGGTATTGGCCTACCATGGTTGTAACGGGTAA  
CGGGGAATTAGGGTTCGATTCGGAGAGGGAGCCTGAGAAAATGGCTACCACTTCTACGGA  
AGGCAGCAGGCGCGCAAATT-ACTCAATCCCAATAC-GGGGAAGTAGCGACAATAAATAT  
CAATACCTATCC--TT-TTTGGAGG--GCAATTGAAATGAACACAAATTAATACTTTAA  
TT-AACACAATTGGAGGGCAAGTCTGGTCCAGCAGCCGCGGTAATCCAGCTCCAA-TA  
GCATATACTAAAGTTGTTGCAGTTAAAA-AGC-TCGTAGTTGAAGTTAAAGGTTTACC-G  
GG-TTTA-----CGTCATTG-TCACTTC-----G-TGGCTAAAT---C  
GACTCCGGTATCTCTTT-C-TT----AATAG-TTCAGCTTTCATTATCTT-----TG  
ATAGTGGTTGTTG-----GACATTTCACTGTGAGAAAA-TTGTGGTGT  
TAAAGCA--GG-C---GTC---TC-GCCTGATCTTTTCAGCATGGTATGATGAAACATG  
ACAT--TTTACGT--TATTGGTTT--GCG----TCTAAAGTGAATGATTAATAGGGAT  
GGATGGGGGTGTTCAATTGGTGGGCGAGAGGTGAAATTCGTTGACCCTATCAAGATGAA  
CTTCTGCGAAAGCATTACCAAATACTTCCCATTAAATCAAGAACGAAAGTTTGGGGATC  
GAAGACGATCAGATACCGTCTGATGCCAACTATAAACTATGTCGACCAGGGATCGGTTA  
AA--AT-TTTTTTAAAATTTAATCGGCACCTT-GTGAGAAATCAC-GAGTGTTTAGATTC  
CGGGGGGAGTATGGTCGCAAGTCTGAACTTAAAGGAATTGACGGAAGGGCACACAATGG

AGTGGAG-CCTGCGGCTTAATTT-GACTCAACTCGGGAAA-ACTTACCAAGCTAAGATAT  
AGTAAGGATTGACAGA-CTAA-AAGATCTTTCATGATTCTATAAGTGGTGGTGCATGGTC  
GTTCTTAG-TTGGTGGAGCGATTTGTCTGGTCAATTCCGATAACGGACGAGACCTCGACC  
TGCTAACTAGTAGTATTTATTA-GTCGATATGGACGATAGCTTTTCTGGGGTTTGG-AAT  
GATT---TC--GGTCATC---TCC-TGCTTCAAGGAG---TGTGTAGTCTGACTCGA  
TAG--GTACGAATTC---AAAAA-----CTTCTTAGAGGGACTACCT-GCCTCAAGCAG  
GCGG-AAGTCCGAGGCAATAACAGGTCTGTGATGCCCTTAGATACCTT-GGGCCGCACGC  
GCGCTACAATGTAGGAAACAAAAAGGC-----TCC-----TGGTCCGG-AAG---GA  
TT-GGGTAATCATTGAATTTCTACGTAACCTGGGATTG-ATCTTTGTAATTATTGATCA  
TAAACGAGGAATTCCTTGAAGCATAAGTCATTACCTTATGCTGAATATGTCCCTGCCCT  
TTGTACACACCCCGCTCGCTCCTACCGATCGAATGATACGGTAAAGTTAACGGATCG--  
-----TTTT--ATCTGTGG-C-AAC-ACTGATA-----TAAA-TTA-AAAG--TTA  
-TT-TAAATCT--C---ATT--GTTT  
>HQ141484.1 Dictyostelium sp. Laos5\_Laos5  
TCTAAG-TATAAATCTTG-TACGATGAAA---CTGCAGACGGCTCATT--ACAA--CA  
---GT---GATAAACTA-ATAGACTTTCGG-GTTTT-----ACTTTT-GGATAACCG  
CAGTAAATCGGGGCTAATACATACAAG-CG-ATGGG-TGACTGGC-----AAC-G-G-AA  
GCTCAGCGATTATT---A-GCA-TT-CTA-CCAATAC--CTTC--GGGTTTTG--GGT  
GAGACCGAATAATATGCAGATCGAGG-----ATT-TATCTTCGACAAGTCTACTGT  
GACTGCCCTATCAACTTTCGATGGTACGGTATTGGCCTACCATGGTTGTAACGGGTAA  
CGGGGAATTAGGGTTCGATTCGGAGAGGGAGCCTGAGAAATGGCTACCACTTCTACGGA  
AGGCAGCAGGCGCGCAAATT-ACTCAATCCCAATAC-GGGGAAGTAGTGACAATAAATAT  
CAATACCTATCC--TT-TTTGGAGG--GCAATTGAAATGAACACAAATTTAAACTCTTAA  
TT-AACACAATTGGAGGGCAAGTCTGGTGCAGCAGCCGCGGTAATTCCAGCTCCAA-TA  
GCATATACTAAAGTTGTTGCAGTTAAAA-AGC-TCGTAGTTGAAGTTAAAGGTTTACT-G  
GG-TAAA-----CGTCATTG-TCACTTC-----G-TGGCTAAAT---C  
GACTCCAGTATCTTTT-C-TT-----AATAG-TTCAGCTTTCGTTATCTT-----TG  
ATAGCGTTGTTG-----GACATTTCACTGTGAGAAAA-TTGTGGTGT  
TAAAGCA--GG-C---GTC---TC-GCCTGATCTTTTGCAGCATGGTATGATGAAACATG  
ACAT--TTTACGC--TATTGGTTT--GCG---TCTAAAGTGTAATGATTAATAGGGAT  
GGATGGGGGTGTTTCATATTGGTGGGCGAGAGGTGAAATTCGTTGACCCTATCAAGATGAA  
CTTCTGCGAAAAGCATTACCAAATCTTCCCATAATCAAGAACGAAAGTTTGGGGATC  
GAAAGCAGATCAGATACCGTCTAGTCCAAACTATAAACTATGTGACCAGGGATCGGTAA  
AA--AT-TTTTTAAAAATTTAATCGGCACCTT-GTGAGAAATCAC-GAGTGTTAGATTC  
CGGGGGGAGTATGGTGCAGAGTCTGAAACTTAAAGGAATTGACGGAAGGGCACACAATGG  
AGTGGAG-CCTGCGGCTTAATTT-GACTCAACTCGGGAAA-ACTTACCAAGCTAAGATAT  
AGTAAGGATTGACAGA-CTAA-AAGATCTTTCATGATTCTATAAGTGGTGGTGCATGGTC  
GTTCTTAG-TTGGTGGAGCGATTTGTCTGGTCAATTCCGATAACGGACGAGACCTCGACC  
TGCTAACTAGTAGTATTTATTA-GTCGATATGGGCGATAGCTTTTCTGGGGTTTGG-AAT  
GATT---TC--GGTCATC---TCC-TGCTTCAAGGAG---TGTGTAGTCTGACTCGA  
TAG--GTACGATTC-----AA-----CTTCTTAGAGGGACTACCT-GCCTCAAGCAG  
GCGG-AAGTCCGAGGCAATAACAGGTCTGTGATGCCCTTAGATACCTT-GGGCCGCACGC  
GCGCTACAATGTAGGAAACAAAAAGGC-----TCC-----TGGTCCGG-AAG---GA  
TT-GGGTAATCATTGAATTTCTACGTAACCTGGGATTG-ATCTTTGTAATTATTGATCA  
TAAACGAGGAATTCCTTGAAGCGTAAGTCATTACCTTATGCTGAATATGTCCCTGCCCT  
TTGTACACACCCCGCTCGCTCCTACCGATCGAATGATACGGTAAAGTTAACGGATCG--  
-----TTTT--ATCTGTGG-C-AAC-ACTGATA-----TAAA-TTA-AAAG--TTA  
-TT-TAAATCT--C---ATT--GTTT  
>MH280023.1 Dictyostelium purpureum var. pseudosessile\_MR273\_4446  
-----TAAATCTTG-TACGATGAAA---CTGCAGACGGCTCATT--ACAA--CA  
---GT---GATAAACTG-CTAGACTTTCGG-GTTTT-----AACTTTT-GGATAACCG  
CAGTAAATCGGGGCTAATACATACAAG-CG-ATGGG-TGACTGGC-----AAC-G-G-AA  
GCTCAGCGATTATT---A-GCG-TTA-CTA-CCAATAC--CTTC--GGGTCTGT-GGT  
GAAACCGAATAATATGCAGATCGGGG-----ATT-TATCTTCGACAAGTCTACTGT  
GTCACTGCCCTATCAACTTTCGATGGTACGGTATTGGCCTACCATGGTTGTAACGGGTAA  
CGGGGAATTAGGGTTCGATTCGGAGAGGGAGCCTGAGAAATGGCTACCACTTCTACGGA  
AGGCAGCAGGCGCGCAAATT-ACTCAATCCCAATAC-GGGGAAGTAGTGACAATAAATAT  
CAATACCTATCC--TT-TTTGGAGG--GCAATTGAAATGAACACAAATTTAAACTCTTAA  
TT-AACACAATTGGAGGGCAAGTCTGGTGCAGCAGCCGCGGTAATTCCAGCTCCAA-TA  
GCATATACTAAAGTTGTTGCAGTTAAAA-AGC-TCGTAGTTGAAGTTAAAGTTATATT-G  
GG-CTCA-----AGTTTTTTA-CCACGTCT-----G-TGGCTAAAA---T  
AACTCCAATATTTCTTTTT-TT-----AATAG-CTCAGTTTCTAGG-TCTT-----TG  
ACTCTAGTTATTTG-----GGCATTTCACTGTGAGAAAA-TTGTGGTGT  
TAAAGCA--GG-C---GTC---TC-GTCTGATCTTTTGCAGCATGGTATGATGAAACATG  
ACAT--TTTACGC--TATTGGTTT--GCG---TCTAAAGTGTAATGATTAATAGGGAT  
GGATGGGGATGTTTCATATTGGTGGGCGAGAGGTGAAATTCGTTGACCCTATCAAGATGAA  
CTTCTGCGAAAAGCATTATCAAACTTCCCATAATCAAGAACGAAAGTTTGGGGATC  
GAAGCAGATCAGATACCGTCTAGTCCAAACTATAAACTATGTGACCAGGGATCGGCTA  
AA--AT-TTTTTAAAAATTTAGTCGGCACCTT-GTGAGAAATCAT-GAGTGTTAGATTC  
CGGGGGGAGTATGGTGCAGTCTGAAACTTAAAGGAATTGACGGAAGGGCACACAATGG  
AGTGGAG-CCTGCGGCTTAATTT-GACTCAACTCGGGAAA-ACTTACCAAGCTAAGATAT  
AGTAAGGATTGACAGA-CTAA-AAGATCTTTCATGATTCTATAAGTGGTGGTGCATGGTC  
GTTCTTAG-TTGGTGGAGCGATTTGTCTGGTCAATTCCGATAACGGACGAGACCTCGACC

TGCTAACTAGTAGTATTTATTA-GCCGATATGGGCGATAGCTTCTCTGGGGTTT-G-AGT  
G-CG---GT--AA-CGTA----TCTTGGCTTCAAGGAG---TGTGTAGTCTGGCTTGA  
TAG--GTACGATATT---AAAAA---A--CTTCTTAGAGGGACTACCT-GCCTCAAGCAG  
GCGG-AAGTCCGAGGCAATAACAGGTCTGTGATGCCCTTAGATACCTT-GGGCCGCACGC  
GCGCTACAATGCAGATAGCAAAAAGGT-----TCC-----TGGCCTGG-AAA---GG  
TT-GGGTAATCAATTGAATTTCTGCGTAACCTGGGATTG-ATCTTTGTAATTATTGATCA  
TCAACGAGGAATTCCTTGTAAAGCGTAAAGTCATTACCTTATGCTGAATATGTCCCTGCCCT  
TTGTACACACCGCCCGTCTCTACCGATCGAATGATACGGTAAAGTTAACGGATTG--  
-----TTTT---TTTGTGG-C-AAC-ACAATTA-----AAA--TTA-AAAG--TTA  
-TT-TAAATCT--C----ATT--GTTT  
>GQ496161.1\_Dictyostelium\_gargantum  
TCTAAG-TATAAATCTTG-TACGATGAAA----CTGCAGACGGCTCATT--ACAA--CA  
---GT---GATAAACTA-ATAGACTTTCGG-GTTTTT---AACCTTTT-GGATAACCG  
CAGTAAATCGGGGTAATACATAGAAG-CG-ATGGG-TGACTGGC-----AAC-G-G-AA  
GCTCAGCGATTATT---A-GCA-TTA-CTA-CCAATAC--CTTC--GGGTCTGT-GGT  
GAAACCGAATAATATTGCAGATCGAGG-----ATT-TATCTTCGACAAGTCTATTGT  
GTCACTGCCCTATCAACTTTCGATGGTACGGTATTGGCCTACCATGGTTGTAACGGGTAA  
CGGGGAATTAGGGTTCGATTCCGGAGAGGGAGCCTGAGAAATGGCTACCACTTCTACGGA  
AGGCAGCAGGCGCGCAAATT-ACTCAATCCCAATAC-GGGGAAGTAGTGACAATAAATAT  
CAATACCTATCC--TT-TTTGGAGG--GCAATTGAAATGAACACAAAATTTAAACTCTTAA  
TT-AACACAATTGGAGGGCAAGTCTGGTGCCAGCAGCCGCGGTAATTCCAGTCCAA-TA  
GCATATACTAAAGTTGTCAGTTAAAA-AGC-TCGTAGTTGAAGTTAAGGGTTATC-G  
GG-CTAA-----AGTTATTTG-CCACTTT-----G-TGGTAAAT---C  
AACTCCGGTATTCTTTTC-TT-----AATAG-TTCAGCTTCTATTATCTT-----TG  
ATAGTAGTTGTTT-----GGCATTTCAGTGTGAGAAAA-TTGTGGTGT  
TAAAGCA--GG-C---GTC--TC-GCCTGATCTTTGCAGCATGGTATGATGAAACATG  
ACAT---TTTACGC--TATTGGTTT--GCG---TCTAAAGTGAATGATTAATAGGGAT  
GGATGGGGGTGTTTCATATTGGTGGGCGAGAGGTGAAATTCGTTGACCCTATCAAGATGAA  
CTTCTGCGAAAGCATTACCAAACTTCCCATTAATCAAGAACGAAAGTTTGGGGATC  
GAAGACGATCAGATACCGTCTAGTCCAAACTATAAACTATGTCGACCAGGGATCGGTTA  
AA--AT-TTTTTAAAAATTTAATCGGCACCTT-GTGAGAAATCAC-GAGTGTGTTAGATTC  
CGGGGGGAGTATGGTTCGCAAGTCTGAACTTAAAGGAATTGACGGAAGGGCACACAATGG  
AGTGGAG-CCTGCGGCTTAATTT-GACTCAACTCGGAAAA-ACTTACCAAGCTAAGATAT  
AGTAAGGATTGACAGA-CTAA-AAGATCTTTCATGATCTATAAGTGGTGGTGCATGGTC  
GTTCTTAG-TTGGTG-AGCGATTTGTCTGGTCAATTCCGATAACGGACGAGACCTCGACC  
TGCTAACTAGTAGTATTTATTA-GTCGATATGGGCGATAGCTTCTCTGGGGTTTGG-AAC  
GGCT---TC--GGCCGTC---TCC-TGCTTCAAGGAG---TGTGTAGTCTGACTTGA  
TAG--GTACGAATTC---AAAAA-----CTTCTTAGAGGGACTACCT-GCCTCAAGCAG  
GCGG-AAGTCCGAGGCAATAACAGGTCTGTGATGCCCTTAGATACCTT-GGGCCGCACGC  
GCGCTACAATGTATAAAAAAAAAGGT-----TCC-----TGGTCCGG-AAG---GA  
TT-GGGTAATCAATGAAATTTTCTACGTAACCTGGGATTG-ATCTTTGTAATTATTGATCA  
TCAACGAGGAATTCCTTGTAAAGCGTAAAGTCATTACCTTATGCTGAATATGTCCCTGCCCT  
TTGTACACACCGCCCGTCTCTACCGATCGAATGATACGGTAAAGTTAACGGATCG--  
-----TTTT--ATTTGTGG-C-AAC-ACAATTA-----AAGA-CTA-AAAG--TTA  
-TT-TAAATCT--C----ATT--GTT-  
>AM168064.1\_Dictyostelium\_robustum\_TNS\_C\_219  
TCTAAG-TATAAATCTTG-TACGATGAAA----CTGCAGACGGCTCATT--ACAA--CA  
---GT---GATAAACTA-ATAGACTTTCGG-GTTTTT---AACCTTTT-GGATAACCG  
CAGTAAATCGGGGTAATACATAGAAG-CG-ATGGG-TGACTGGC-----AAC-G-G-AA  
GCTCAGCGATTATT---A-GCA-TTA-CTA-CCAATAC--CTTC--GGGTCTGT-GGT  
GAAACCGAATAATATTGCAGATCGAGG-----ATT-TATCTTCGACAAGTCTATTGT  
GTCACTGCCCTATCAACTTTCGATGGTACGGTATAGGCCTACCATGGTTGTAACGGGTAA  
CGGGGAATTAGGGTTCGATTCCGGAGAGGGAGCCTGAGAAATGGCTACCACTTCTACGGA  
AGGCAGCAGGCGCGCAAATT-ACTCAATCCCAATAC-GGGGAAGTAGTGACAATAAATAT  
CAATACCTATCC--TT-TTTGGAGG--GCAATTGAAATGAACACAAAATTTAAACTCTTAA  
TT-AACACAATTGGAGGGCAAGTCTGGTGCCAGCAGCCGCGGTAATTCCAGTCCAA-TA  
GCATATACTAAAGTCGTTGCAGTTAAAA-AGC-TCGTAGTTGAAGTTAAGGGTTTATC-G  
GG-CTAA-----AGTTATTTG-CCACTTT-----G-TGGTAAAT---C  
AACTCCGGTATTCTTTTC-TT-----AATAG-TTCAGCTTCTATTATCTT-----TG  
ATAGTAGTTGTTT-----GGCATTTCAGTGTGAGAAAA-TTGTGGTGT  
TAAAGCA--GG-C---GTC--TC-GCCTGATCTTTGCAGCATGGTATGATGAAACATG  
ACAT---TTTACGC--TATTGGTTT--GCG---TCTAAAGTGAATGATTAATAGGGAT  
GGATGGGGGTGTTTCATATTGGTGGGCGAGAGGTGAAATTCGTTGACCCTATCAAGATGAA  
CTTCTGCGAAAGCATTACCAAACTTCCCATTAATCAAGAACGAAAGTTTGGGGATC  
GAAGACGATCAGATACCGTCTAGTCCAAACTATAAACTATGTCGACCAGGGATCGGTTA  
AA--AT-TTTTTAAAAATTTAATCGGCACCTT-GTGAGAAATCAC-GAGTGTGTTAGATTC  
CGGGGGGAGTATGGTTCGCAAGTCTGAACTTAAAGGAATTGACGGAAGGGCACACAATGG  
AGTGGAG-CCTGCGGCTTAATTT-GACTCAACTCGGAAAA-ACTTACCAAGCTAAGATAT  
AGTAAGGATTGACAGA-CTAA-AAGATCTTTCATGATCTATAAGTGGTGGTGCATGGTC  
GTTCTTAG-TGGTGG-AGCGATTTGTCTGGTCAATTCCGATAACGGACGAGACCTCGACC  
TGCTAACTAGTAGTATTTATTA-GTCGATATGGGCGATAGCTTCTCTGGGGTTTGG-AAC  
GGCT---TC--GGCCGTC---TCC-TGCTTCAAGGAG---TGTGTAGTCTGACTTGA  
TAG--GTACGAATTC---AAAAA-----CTTCTTAGAGGGACTACCT-GCCTCAAGCAG

GCGG-AAGTCCGAGGCAATAACAGGTCTGTGATGCCCTTAGATACCTT-GGGCCGCACGC  
GCGCTACAATGTAGAAAACAAAAAGGT-----TCC-----TGGTCCGG-AAG---GA  
TT-GGGTAATCAATTGAATTTTCTACGTAACCTGGGATTG-ATCTTTGTAATTATTGATCA  
TCAACGAGGAATTCCTTGTAAAGCGTAAGTCATTACCTTATGCTGAATATGTCCTGCCCT  
TTGTACACACCGCCCGTCTCTACCGATCGAATGATACGGTAAAGTTAACGGATCG--  
-----TTTT--ATTTGTGG-C-AAC-ACAAATT-----AAGA-CTA-AAAG--TTA  
-TT-TAAATCT--C----ATT--GTTT

>AM168031.1 *Dictyostelium brunneum* WS700

TCTAAG-TATAAATCTTG-TACGATGAAA---CTGCAGACGGCTCATT--ACAA--CA  
---GT---GATAAACTA-ATAGACTTTCGG-GTTTTT----AACCTTTT-GGATAACCG  
CAGTAAATCGGGGCTAATACATAGAAG-CG-ATGGG-TGACTGGC-----AAC-G-G-AA  
GCTCAGCGATTATT---A-GCA-TTA-CTA-CCAATAC--CTTC--GGGTCTTGT-GGT  
GAAACCGAATAATATTGCAGATCGAGG-----ATT-TATCTTCGACAAGTCTACTGT  
GTCACTGCCCTATCAACTTTCGATGGTACGGTATTGGCCTACCATGGTTGTAACGGGTAA  
CGGGGAATTAGGGTTCGATTCCGGAGAGGGAGCCTGAGAAAATGGCTACCACTTCTACGGA  
AGGCAGCAGGCGCGCAAATT-ACTCAATCCCAATAC-GGGGAAGTAGTGACAATAAATAT  
CAATACCTATCC--TT-TTTGGAGG--GCAATTGAAATGAACACAAATTAATACTTTAA  
TT-AACACAATTGGAGGGCAAGTCTGGTGCCAGCAGCCGCGGTAATTCCAGCTCCAA-TA  
GCATATACTAAAGTTGTTCAGTTAAAA-AGC-TCGTAGTTGAAGTTAAGGGTTTATC-G  
GG-CTAA-----AGTTATTTG-CCACTTT-----G-TGGTAAAATT---C  
AACTCCGGTATTCTTTTC-TT----AATAG-TTCAGCTTCTATTATCTT-----TG  
ATAGTAGTTGTTT-----GGCATTTCAGTGTGAGAAAA-TTGTGGTGT  
TAAAGCA--GG-C---GTC---TC-GCCTGATCTTTGCAGCATGGTATGATGAAACATG  
ACAT---TTTACGC--TATTGGTTT--GCG----TCTAAAGTGTAATGATTAATAGGGAT  
GGATGGGGGTGTTTCATATTGGTGGGCGAGAGGTGAAATTCGTTGACCCTATCAAGATGAA  
CTTCTGCGAAAGCATTACCAAACTACTTCCCATTAATCAAGAACGAAAGTTTGGGGATC  
GAAGACGATCAGATACCGTCTGATGCCAAACTATAAACTATGTGACACAGGGATCGGTAA  
AA--AT-TTTTTAAAAATTTAATCGGCACCTT-GTGAGAAAATCAC-GAGTGTTTAGATT  
CGGGGGGAGTATGGTTCGCAAGTCTGAACTTAAAGGAATTGACGGAAGGGCACACAATGG  
AGTGGAG-CCTGCGGCTTAATTT-GACTCAACTCGGGAAA-ACTTACCAAGCTAAGATAT  
AGTAAGGATTGACAGA-CTAA-AAGATCTTTCATGATTCTATAAGTGGTGGTGCATGGTC  
GTTCTTAG-TTGGTGGAGCGATTGTCTGGTCAATTCCGATAACGACGACCTCGACC  
TGCTAACTAGTAGTATTTATTA-GTCAACATAGGCGATAGCTTTTCTGGGGTTTGG-AAT  
GATT---TC--GGTCATC---TCC-TGCTTCAAGGAG---TGTGTAGTCCGGCTTGA  
TAG--GTACGAATC---AAAAA-----CTTCTTAGAGGGACTACCT-GCCTCAAGCAG  
GCGG-AAGTCCGAGGCAATAACAGGTCTGTGATGCCCTTAGATACCTT-GGGCCGCACGC  
GCGCTACAATGTAGAAAACAAAAAGGT-----TCC-----TGGTCCGG-AAG---GA  
TT-GGGTAATCAATTGAATTTTCTACGTAACCTGGGATTG-ATCTTTGTAATTATTGATCA  
TCAACGAGGAATTCCTTGTAAAGCGCAAGTCATTACCTTGTGCTGAATATGTCCTGCCCT  
TTGTACACACCGCCCGTCTCTACCGATCGAATGATACGGTAAAGTTAACGGATCG--  
-----TTTT--ATTTGTGG-C-AAC-ACATTAT-----AAGA-CTA-AAAG--TTA  
-TT-TAAATCT--C----ATT--GTTT

>AM168042.1 *Dictyostelium giganteum* WS589

TCTAAG-TATAAATCTTG-TACGATGAAA---CTGCAGACGGCTCATT--ACAA--CA  
---GT---GATAAACTA-ATAGACTTTCGG-GTTTTT----AACCTTTT-GGATAACCG  
CAGTAAATCGGGGCTAATACATAGAAG-CG-ATGGG-TGACTGGC-----AAC-G-G-AA  
GCTCAGCGATTATT---A-GCA-TTA-CTA-CCAATAC--CTTC--GGGTCTTGT-GGT  
GAAACCGAATAATATTGCAGATCGAGG-----ATT-TATCTTCGACAAGTCTACTGT  
GTCAGTCCCTAATCAACTTTCGATGGTACGGTATTGGCCTACCATGGTTGTAACGGGTAA  
CGGGGAATTAGGGTTCGATTCCGGAGAGGGAGCCTGAGAAAATGGCTACCACTTCTACGGA  
AGGCAGCAGGCGCGCAAATT-ACTCAATCCCAATAC-GGGGAAGTAGTGACAATAAATAT  
CAATACCTATCC--TT-TTTGGAGG--GCAATTGAAATGAACACAAATTAATACTTTAA  
TT-AACACAATTGGAGGGCAAGTCTGGTGCCAGCAGCCGCGGTAATTCCAGCTCCAA-TA  
GCATATACTAAAGTTGTTGCAAGTTAAAA-AGC-TCGTAGTTGAAGTTAAGGGTTTATC-G  
GG-CTAA-----AGTTATTTG-CCACTTT-----G-TGGTAAAATT---C  
AACTCCGGTATTCTTTTC-TT----AATAG-TTCAGCTTCCATTATCTT-----TG  
ATAGTGGTTGTTT-----GGCATTTCAGTGTGAGAAAA-TTGTGGTGT  
TAAAGCA--GG-C---GTC---TC-GCCTGATCTTTGCAGCATGGTATGATGAAACATG  
ACAT---TTTACGC--TATTGGTTT--GCG----TCTAAAGTGTAATGATTAATAGGGAT  
GGATGGGGGTGTTTCATATTGGTGGGCGAGAGGTGAAATTCGTTGACCCTATCAAGATGAA  
CTTCTGCGAAAGCATTACCAAACTACTTCCCATTAATCAAGAACGAAAGTTTGGGGATC  
GAAGACGATCAGATACCGTCTGATGCCAAACTATAAACTATGTGACACAGGGATCGGTAA  
AA--AT-TTTTTAAAAATTTAATCGGCACCTT-GTGAGAAAATCAC-GAGTGTTTAGATT  
CGGGGGGAGTATGGTTCGCAAGTCTGAACTTAAAGGAATTGACGGAAGGGCACACAATGG  
AGTGGAG-CCTGCGGCTTAATTT-GACTCAACTCGGGAAA-ACTTACCAAGCTAAGATAT  
AGTAAGGATTGACAGA-CTAA-AAGATCTTTCATGATTCTATAAGTGGTGGTGCATGGTC  
GTTCTTAG-TTGGTGGAGCGATTGTCTGGTCAATTCCGATAACGACGACCTCGACC  
TGCTAACTAGTAGTATTTATTA-GTGCATATGGGCGATAGCTTCTGCGGGTTTGG-AAT  
GATT---TC--GGTCATC---TCC-TGCTTCAAGGAG---TGTGTAGTCTGACTTGA  
TAG--GTACGAATC---AAAAA-----CTTCTTAGAGGGACTACCT-GCCTCAAGCAG  
GCGG-AAGTCCGAGGCAATAACAGGTCTGTGATGCCCTTAGATACCTT-GGGCCGCACGC  
GCGCTACAATGTAGAAAACAAAAAGGT-----TCC-----TGGTCCGG-AAG---GA  
TT-GGGTAATCAATTGAATTTTCTACGTAACCTGGGATTG-ATCTTTGTAATTATTGATCA

TCAACGAGGAATTCCTTGTAAAGCGCAAGTCATTACCTTGTGCTGAATATGTCCTGCCCT  
TTGTACACACCGCCCGTCCTACCGATCGAATGATACGGTAAAGTTAACGGATCG--  
-----TTTT--ATTTGTGG-C-AAC-ACATTAT-----AAGA-CTA-AAAG--TTA  
-TT-TAAATCT--C----ATT--GTTT  
>HQ141483.1 Dictyostelium sp. Laos1\_Laos1  
TCTAAG-TATAAATCTTG-TACGATGAAA----CTGCAGA-GGCTCATT--ACAA--CA  
---GT---GATAAACTA-ATAGACTTTCGG-GTTTTT----AACCTTTT-GGATAACCG  
CAGTAAATCGGGGCTAATACATAGAAG-CG-ATGGG-TGACTGGC-----AAC-G-G-AA  
GCTCAGCGATTATT---A-GCA-TTA-CTA-CCAATAC--CTTC--GGGTCTGT-GGT  
GAAACCGAATAATATGACAGATCGAGG-----ATT-TATCTTCGACAAGTCTACTGT  
GTCACTGCCCTATCAACTTTCGATGGTACGGTATTGGCCTACCATGGTTGTAACGGGTAA  
CGGGGAATTAGGGTTCGATTCCGGAGAGGGAGCCTGAGAAATGGCTACCACTTCTACGGA  
AGGCAGCAGGCGCGCAAATT-ACTCAATCCCAATAC-GGGGAAGTAGTGACAATAAATAT  
CAATACCTATCC--TT-TTTGGAGG--GCAATTGAAATGAACACAAATTTAAACTCTTAA  
TT-AACACAATTGGAGGGCAAGTCTGGTGCAGCAGCCGCGTAATTCAGCTCCAA-TA  
GCATATACTAAAGTTGTTGCAGTTAAAA-AGC-TCGTAGTTGAAGTTAAGGGTTATC-G  
GG-CTAA-----AGTTATTG-CCACTTT-----G-TGGTTAAATT--C  
AACTCCGGTATTCCTTTT-C-TT----AATAG-TTCAGCTTCCATTATCTT-----TG  
ATAGTGGTTGTTT-----GGCATTTCACTGTGAGAAAA-TTGTGGTGT  
TAAAGCA--GG-C---GTC---TC-GCCTGATCTTTGTCAGCATGGTATGATGAAACATG  
ACAT---TTTACGC--TATTGGTTT--GCG---TCTAAAGTGTAATGATTAATAGGGAT  
GGATGGGGGTGTTTCATATTGGTGGGCGAGAGGTGAAATTCGTTGACCCTATCAAGATGAA  
CTTCTGCGAAAGCATTCCCAATACTTCCCATAATCAAGAACGAAAGTTTGGGGATC  
GAAAGCATCAGATACCGTCTAGTCCAAACTATAAACTATGTCGACCAGGGATCGGGTA  
AA--AT-TTTTTTAAATTTAATCGGCACCTT-GTGAGAAATCAC-GAGTGTTTAGATT  
CGGGGGGAGTATGGTTCGCAAGTCTGAACTTAAAGGAATTGACGGAAGGGCACACAATG  
AGTGGAG-CCTGCGGCTTAATTT-GACTCAACTCGGGAAA-ACTTACCAAGCTAAGATAT  
AGTAAGGATTGACAGA-CTAA-AAGATCTTTCATGATTCTATAAGTGGTGGTGCATGGTC  
GTTCTTAG-TTGGTGGAGCGATTGTCTGGTCAATTCCGATAACGGACGAGACCTCGACC  
TGCTAACTAGTAGTATTTA-TA-GTCGATATGGGCGATAGCTTCTCTGGGGTTTGG-AAT  
GACT---TC--GGTCATC---TCC-TGCTTCAAGGAG---TGTGTAGTCTGACTTGA  
TAG--GTACGAATC---AAAA---CTTCTAGAGGGACTACCT-GCCTCAAGCAG  
GCGG-AAGTCCGAGGCAATAACAGGTCTGTGATGCCCTTAGATACCTT-GGGCCGCACGC  
GCGCTACAATGTAGAAAACAAAAAGGT-----TCC-----TGGTCCG-AAG--GA  
TT-GGGTAATCAATTGAATTTTCTACGTAAGTGGGATTG-ATCTTTGTAATTATTGATCA  
TCAACGAGGAATTCCTGTAAAGCGCAAGTCAATTACCTTGTGCTGAATATGTCCTGCCCT  
TTGTACACACCGCCCGTCTACCGATCGAATGATACGGTAAAGTTAACGGATCG--  
-----TTTT--ATTTGTGG-C-AAC-ACATTAT-----AAGA-CTA-AAAG--TTA  
-TT-TAAATCT--C----ATT--GTT-  
>FJ424829.1 Dictyostelium purpureum\_QSpul  
TCTAAG-TATAAATCTTG-TACGATGAAA----CTGCAGACGGCTCATT--ACAA--CA  
---GT---GATAAACTG-CTAGACTTTCGG-GTTTTT----AACCTTTT-GGATAACCG  
CAGTAAATCGGGGCTAATACATACAG-CG-ATGGG-TGACTGGC-----AAC-G-G-AA  
GCTCAGCGATTATT---A-GCG-TTA-CTA-CCAATAC--CTTC--GGGTCTGT-GGT  
GAAACCGAATAATATGACAGATCGGG-----ATT-TATCTTCGACAAGTCTACTGT  
GTCACTGCCCTATCAACTTTCGATGGTACGGTATTGGCCTACCATGGTTGTAACGGGTAA  
CGGGGAATTAGGGTTCGATTCCGGAGAGGGAGCCTGAGAAATGGCTACCACTTCTACGGA  
AGGCAGCAGGCGCGCAAATT-ACTCAATCCCAATAC-GGGGAAGTAGTGACAATAAATAT  
CAATACCTATCC--TT-TTTGGAGG--GCAATTGAAATGAACACAAATTTAAACTCTTAA  
TT-AACACAATTGGAGGGCAAGTCTGGTGCAGCAGCCGCGTAATTCAGCTCCAA-TA  
GCATATACTAAAGTTGTTGCAGTTAAAA-AGC-TCGTAGTTGAAGTTAAGTTATATT-G  
GG-CTCA-----AGTTTTTA-CCACGCT-----G-TGGCTAAAA---T  
AACTCCAATATTTCTTTT-TT----AATAG-CTCAGTTTCTAGG-TCTT-----TG  
ACTCTAGTTATTT-----GGCATTTCACTGTGAGAAAA-TTGTGGTGT  
TAAAGCA--GG-C---GTC---TC-GTCTGATCTTTGTCAGCATGGTATGATGGAACATG  
ACAT---TTTACGC--TATTGGTTT--GCG---TCTAAAGTGTAATGATTAATAGGGAT  
GGATGGGGATGTTTCATATTGGTGGGCGAGAGGTGAAATTCGTTGACCCTATCAAGATGAA  
CTTCTGCGAAAGCATTTCATCAATACTTCCCATAATCAAGAACGAAAGTTTGGGGATC  
GAAGACGATCAGATACCGTCTAGTCCAAACTATAAACTATGTCGACCAGGGATCGGCTA  
AA--AT-TTTTTTAAATTTAGTCCGCACCTT-GTGAGAAATCAT-GAGTGTTTAGATT  
CGGGGGGAGTATGGTTCGCAAGTCTGAACTTAAAGGAATTGACGGAAGGGCACACAATG  
AGTGGAG-CCTGCGGCTTAATTT-GACTCAACTCGGGAAA-ACTTACCAAGCTAAGATAT  
AGTAAGGATTGACAGA-CTAA-AAGATCTTTCATGATTCTATAAGTGGTGGTGCATGGTC  
GT-CTTAG-TTGGNNNNNNNNNNNNNNNNNNNNNNNNTCCGATAACGGACGAGACCTCGACC  
TGCTAACTAGTAGTATTTA-TA-GCCGATATGGGCGATAGCTTCTCTGGGGTTT-G-AGT  
G-CG---GT--AA-CGTA---TCTTGGCTTCAAGGAG---TGTGTAGTCTGGCTTGA  
TAG--GTACGATATT--AAAA---A--CTTCTAGAGGGACTACCT-GCCTCAAGCAG  
GCGG-AAGTCCGAGGCAATAACAGGTCTGTGATGCCCTTAGATACCTT-GGGCCGCACGC  
GCGCTACAATGCAGATAGCAAAAAGGT-----TCC-----TGGCCTGG-AAA--GG  
TT-GGGTAATCAATTGAATTTTCTGCGTAACTGGGATTG-ATCTTTGTAATTATTGATCA  
TCAACGAGGAATTCCTTGTAAAGCGTAAAGTCAATTACCTTATGCTGAATATGTCCTGCCCT  
TTGTACACACCGCCCGTCTACCGATCGAATGATACGGTAAAGTTAACGGATTG--  
-----TTTT--TTTGTGG-C-AAC-ACAATTA-----AAA--TTA-AAAG--TTA



-TT-TAAATCT--C----ATT--GTTT  
>FJ424839.1\_Dictyostelium\_purpureum\_QSpu2  
-----ACAA--CA  
---GT---GATAAACTG-CTAGACTTTCGG-GTTTTT----AACCTTTT-GGATAACCG  
CAGTAAATCGGGGCTAATACATAGAAG-CG-ATGGG-TGACTGGC-----AAC-G-G-AA  
GCTCAGCGATTATT---A-GCG-TTA-CTA-CCAATAC--CTTC--GGGTCTGT-GGT  
GAAACCGAATAATATTGCAGATCGAGG-----ATT-TATCTTCGACAAGTCTACTGT  
GTCACTGCCCTATCAACTTTCGATGGTACGGTATTGGCCTACCATGGTTGTAACGGGTAA  
CGGGGAATTAGGGTTCGATTCCGGAGAGGGAGCCTGAGAAATGGCTACCCTTCTACGGA  
AGGCAGCAGGCGCGCAAATT-ACTCAATCCCAATAC-GGGGAAGTAGTGACAATAAATAT  
CAATACCTATCC--TT-TTTGGAGG--GCAATTGAAATGAACACAAATTAATACTTTAA  
TT-AACACAATTGGAGGGCAAGTCTGGTGCCAGCAGCCGCGGTAATTCCAGCTCCAA-TA  
GCATATACTAAAGTTGTTGCAGTAAAA-AGC-TCGTAGTTGAAGTTAAAGTTTATT-G  
GG-CTCA-----AGTTTTTTA-CCACTCT-----GGTGGCTAAAA----C  
AACTCCAATAATTTCTTTTT-TT----AATAG-CTCAGTTTCTAGG-TCTT-----TG  
ACTCTAGTTATTG-----GGCATTTCCTGTGAGAAAA-TTGTGGTGTT  
TAAAGCA--GG-C--GTC--TC-GTCTGATCTTTGCAGCATGGTATGATGAAACATG  
ACAT--TTTACGC--TATTGGTT--GCG----TCTAAAGTGTAATGATTAATAGGGAT  
GGATGGGGATGTTCAATTTGGTGGCGAGAGGTGAAATTCGTTGACCCTATCAAGATGAA  
CTTCTGCGAAAGCATTATCAATACTTCCCATTAATCAAGAACGAAAGTTTGGGGATC  
GAAGACGATCAGATACCGTCGTAGTCCAACTATAAACTATGTGACCAGGGATCGGCTA  
AA--AT-TTTTTAAAAATTTAGTCGGCACCTT-GTGAGAAATCAT-GAGTGTTTAGATTC  
CGGGGGGAGTATGGTCGAACTTAAAGGAATTGACGGAAGGGCACACAATGG  
AGTGGAG-CCTGCGGCTTAATTT-GACTCAACTCGGAAAA-ACTTACCAAGCTAAGATAT  
AGTAAGGATTGACAGA-CTAA-AAGATCTTTCATGATTCTATAAGTGGTGGTGCATGGTC  
GTTCTTAG-TTGGTGGAGCGATTTGTCTGGTCAATTCCGATAACGGACGAGACCTCGACC  
TGCTAACTAGTAGTATTTATTA-GTCGATATGGGCGATAGCTTTTCTGGGGTTAGG-A-T  
G-CG----GC--AATCGTA---TCTCTGCTTCAAGGAG----TGTGTAGTCTGACTTGA  
TAG--GTACGCTTTC---AAAAA---A--CTTCTAGAGGGACTACCT-GCCTCAAGCAG  
GCGG-AAGTCCGAGGCAATAACAGGTCTGTGATGCCCTTAGATACCTT-GGGCCGCACGC  
GCGCTACAATGCAGATAGCAAAAAGGT----TCC-----TGGCCCG-AAG--GG  
TT-GGGTAATCAATTGAATTTTCTGCGTAACTGGGATTG-ATCTTTGTAATTATTGATCA  
TCAACGAGGAATTCCTTGTAAAGCGTAAAGTCATTACCTTATGCTGAATATGTCCTGCCCT  
TTGTACACACCGCCGTCGCTCCTACCGATCGAATGATACGGTAAAGTTAACGGATAG--  
-----TTTT--TTTGTGG-C-AAC-ACAATA-----AAA--TTA-AAAG--TTA  
-TT-TAAATCT--C----ATT--GTTT

>DQ340386.1\_Dictyostelium\_purpureum  
TCTAAG-TATAAATCTTG-TACGATGAAA----CTGCAGACGGCTCATT--ACAA--CA  
---GT---GATAAACTG-CTAGACTTTCGG-GTTTTT----AACCTTTT-GGATAACCG  
CAGTAAATCGGGGCTAATACATAGAAG-CG-ATGGG-TGACTGGC-----AAC-G-G-AA  
GCTCAGCGATTATT---A-GCA-TTA-CTA-CCAATAC--CTTC--GGGTCTGT-GGT  
GAAACCGAATAATATTGCAGATCGGGG-----ATT-TATCTTCGACAAGTCTACTGT  
GTCACTGCCCTATCAACTTTCGATGGTACGGTATTGGCCTACCATGGTTGTAACGGGTAA  
CGGGGAATTAGGGTTCGATTCCGGAGAGGGAGCCTGAGAAATGGCTACCCTTCTACGGA  
AGGCAGCAGGCGCGCAAATTT-ACTCAATCCCAATAC-GGGGAAGTAGTGACAATAAATAT  
CAATACCTATCC--TT-TTTGGAGG--GCAATTGAAATGAACACAAATTAATACTTTAA  
TT-AACACAATTGGAGGGCAAGTCTGGTGCCAGCAGCCGCGGTAATTCCAGCTCCAA-TA  
GCATATACTAAAGTTGTTGCAGTAAAA-AGC-TCGTAGTTGAAGTTAAAGTTTATT-G  
GG-CTA-----AGTTTTTTA-CCAC-TCT-----G-TGGCTAAAA----T  
AACTCCAATAATTTCTTTTT-TT----AATAG-CTCAGTTTCTAGG-TCTT-----TG  
ACTCTAGTTATTG-----GGCATTTCCTGTGAGAAAA-TTGTGGTGTT  
TAAAGCA--GG-C--GTC--TC-GTCTGATCTTTGCAGCATGGTATGATGGAACATG  
ACAT--TTTACGC--TATTGGTT--GCG----TCTAAAGTGTAATGATTAATAGGGAT  
GGATGGGGATGTTCAATTTGGTGGGCGAGAGGTGAAATTCGTTGACCCTATCAAGATGAA  
CTTCTGCGAAAGCATTATCAATACTTCCCATTAATCAAGAACGAAAGTTTGGGGATC  
GAAGACGATCAGATACCGTCGTAGTCCAACTATAAACTATGTGACCAGGGATCGGCTA  
AA--AT-TTTTTAAAAATTTAGTCGGCACCTT-GTGAGAAATCAT-GAGTGTTTAGATTC  
CGGGGGGAGTATGGTCGCAAGTCTGAACTTAAAGGAATTGACGGAAGGGCACACAATGG  
AGTGGAG-CCTGCGGCTTAATTT-GACTCAACTCGGAAAA-ACTTACCAAGCTAAGATAT  
AGTAAGGATTGACAGA-CTAA-AAGATCTTTCATGATTCTATAAGTGGTGGTGCATGGTC  
GTTCTTAG-TTGGTGGAGCGATTTGTCTGGTCAATTCCGATAACGGACGAGACCTCGACC  
TGCTAACTAGTAGTATTTATTA-TTCGATATGGGCGATAGCTTCTTGGGGTT-GG-AGT  
G-CG----GC--AA-CGTA---TCTCTGCTTCAAGGAG----TGTGTAGTCTGACTTGA  
TAG--GTACGTTATT---TAAAA---A--CTTCTAGAGGGACTACCT-GCCTCAAGCAG  
GCGG-AAGTCCGAGGCAATAACAGGTCTGTGATGCCCTTAGATACCTT-GGGCCGCACGC  
GCGCTACAATGCAGATAGCAAAAAGGT----TCC-----TGGCCTGG-AAA--GG  
TT-GGGTAATCAATTGAATTTTCTGCGTAACTGGGATTG-ATCTTTGTAATTATTGATCA  
TCAACGAGGAATTCCTTGTAAAGCGTAAAGTCATTACCTTATGCTGAATATGTCCTGCCCT  
TTGTACACACCGCCGTCGCTCCTACCGATCGAATGATACGGTAAAGTTAACGGATAG--  
-----TTTT--TTTGTGG-C-AAC-ACAATA-----AAA--TTA-AAAG--TTA  
-TT-TAAATCT--C----ATT--GTTT

>FJ424826.1\_Dictyostelium\_purpureum\_QSpu4  
-----CTTG-TACGATGAAA----CTGCAGACGGCTCATT--ACAA--CA

---GT---GATAAACTG-CTAGACTTTCGG-GTTTT---AACCTTTT-GGATAACCG  
CAGTAAATCGGGGCTAATACATAGAAG-CG-ATGGG-TGACTGGC-----AAC-G-G-AA  
GCTCAGCGATTATT---A-GCA-TTA-CTA-CCAATAC--CTTC--GGGTCTTG-TGT  
GAAACCGAATAATATTGCAGATCGAGG-----ATT-TATCTTCGACAAGTCTACTGT  
GTCAGTCCCTATCAACTTTCGATGGTACGGTATTGGCCTACCATGGTTGTAACGGGTAA  
CGGGGAATTAGGGTTCGATTCGGAGAGGGAGCCTGAGAAATGGCTACCATTCTACGGA  
AGGCAGCAGGCGCGCAAATT-ACTCAATCCCAATAC-GGGGAAGTAGTGACAATAAATAT  
CAATACCTATCC--TT-TTTGGAGG--GCAATTGAAATGAACACAAATTAATACTTTAA  
TT-AACACAATTGGAGGGCAAGTCTGGTGCCAGCAGCCGCGGTAATTCCAGCTCCAA-TA  
GCATATACTAAAGTTGTTGCAGTTAAAA-AGC-TCGTAGTTGAAGTTAAAGTTTTATT-G  
GG-CTTA-----AGTTTTTTA-CCACCTA-----G-TGGCTAAAA----T  
AACTCCAATAATTCTTTTT-TT-----AATAG-CTCAGTTTCTAGG-TCTT-----TG  
ACTCTAGTTATTTG-----GGCATTTCAGTGTGAGAAAA-TTGTGGTGT  
TAAAGCA--GG-C---GTC---TC-GTCTGATCTTTGCAGCATGGTATGATGGAACATG  
ACAT---TTACGC--TATTGGTT--GCG----TCTAAAGTGAATGATTAATAGGGAT  
GGATGGGGATGTTTCATATTGGTGGGCGAGAGGTGAAATTCGTTGACCCTATCAAGATGAA  
CTTCTGCGAAAGCATTCAATACTTCCCATAATCAAGAACGAAAGTTTGGGGATC  
GAAGACGATCAGATACCGTCGTAGTCCAAACTATAAACTATGTGACACAGGGATCGGCTA  
AA--AT-TTTTTAAAAATTAGTCGGCACCTT-GTGAGAAATCAT-GAGTGTTTAGATTC  
CGGGGGAGTATGGTCGAAAGTCTGAACTTAAAGGAATTGACGGAAGGGCACACAATGG  
AGTGGAG-CCTGCGGCTTAATTT-GACTCAACTCGGAAA-ACTTACCAAGCTAAGATAT  
AGTAAGGATTGACAGA-CTAA-AAGATCTTTCATGATTCTATAAGTGGTGGTGCATGGTC  
GTTCTTAG-TTGGTGGAGCGATTTGTCTGGTCAATTCCGATAACGGACGAGACCTCGACC  
TGCTAACTAGTAGTATTTATTA-GTCGATATGGGCGATAGCTTCTCTGGGGTT-GG-AGT  
G-CG----GC--AA-CGTA----TCTCTGCTTCAAGGAG----TGTGTAGTCTGACTTGA  
TAG--GTACGTATT---AAAAA---A--CTTCTTAGAGGGACTACCT-GCCTCAAGCAG  
GCGG-AAGTCCGAGGCAATAACAGGTCTGTGATGCCCTTAGATACCTT-GGGCCGACCG  
GCGCTACAATGCAGATAGCAAAAAGGT----TCC-----TGGCCTGG-AAA---GG  
TT-GGGTAATCAATTGAATTTTCTGCGTAACTGGGATTG-ATCTTTGTAATTATTGATCA  
TCAACGAGGAATTCCTTGTAAAGCGTAAGTCATTACCTTATGCTGAATATGTCCCTGCCCT  
TTGTACACACCCGCTCGCTCCTACCGATCGAATGATACGGTAAAGTTAACGGATAG--  
-----TTTT---TTGTGG-C-AAC-ACAATTA-----AAA--TTA-AAAG--TTA  
-TT-TAAATCT--C----ATT--GTTT

>FJ424832.1 Dictyostelium purpureum\_QSp23

-----TTCTTG-TACGATGAAA---CTGCAGACGGCTCATT--ACAA--CA  
---GT---GATAAACTG-CTAGACTTTCGG-GTTTT---AACCTTTT-GGATAACCG  
CAGTAAATCGGGGCTAATACATAGAAG-CG-ATGGG-TGACTGGC-----AAC-G-G-AA  
GCTCAGCGATTATT---A-GCG-TTA-CTA-CCAATAC--CTTC--GGGTCTTG-TGT  
GAAACCGAATAATATTGCAGATCGGGG-----ATT-TATCTTCGACAAGTCTACTGT  
GTCAGTCCCTATCAACTTTCGATGGTACGGTATTGGCCTACCATGGTTGTAACGGGTAA  
CGGGGAATTAGGGTTCGATTCGGAGAGGGAGCCTGAGAAATGGCTACCATTCTACGGA  
AGGCAGCAGGCGCGCAAATT-ACTCAATCCCAATAC-GGGGAAGTAGTGACAATAAATAT  
CAATACCTATCC--TT-TTTGGAGG--GCAATTGAAATGAACACAAATTAATACTTTAA  
TT-AACACAATTGGAGGGCAAGTCTGGTGCCAGCAGCCGCGGTAATTCCAGCTCCAA-TA  
GCATATACTAAAGTTGTTGCAGTTAAAA-AGC-TCGTAGTTGAAGTTAAAGTTATATT-G  
GG-CTCA-----AGTTTTTTA-CCACGTCT-----G-TGGCTAAAA----T  
AACTCCAATATTCTTTTT-TT-----AATAG-CTCAGTTTCTAGG-TCTT-----TG  
ACTCTAGTTATTTG-----GGCATTTCAGTGTGAGAAAA-TTGTGGTGT  
TAAAGCA--GG-C---GTC---TC-GTCTGATCTTTGCAGCATGGTATGATGGAACATG  
ACAT---TTACGC--TATTGGTT--GCG----TCTAAAGTGAATGATTAATAGGGAT  
GGATGGGGATGTTTCATATTGGTGGGCGAGAGGTGAAATTCGTTGACCCTATCAAGATGAA  
CTTCTGCGAAAGCATTCAATACTTCCCATAATCAAGAACGAAAGTTTGGGGATC  
GAAGACGATCAGATACCGTCGTAGTCCAAACTATAAACTATGTGACACAGGGATCGGCTA  
AA--AT-TTTTTAAAAATTAGTCGGCACCTT-GTGAGAAATCAT-GAGTGTTTAGATTC  
CGGGGGAGTATGGTCGAAAGTCTGAACTTAAAGGAATTGACGGAAGGGCACACAATGG  
AGTGGAG-CCTGCGGCTTAATTT-GACTCAACTCGGAAA-ACTTACCAAGCTAAGATAT  
AGTAAGGATTGACAGA-CTAA-AAGATCTTTCATGATTCTATAAGTGGTGGTGCATGGTC  
GTCNNNNN-NNNNNNNNNNNNNNNNNNNNNNNNNNNNNTCCGATAACGGACGAGACCTCGACC  
TGCTAACTAGTAGTATTTATTA-GCCGATATGGGCGATAGCTTCTCTGGGGTT-TG-AGT  
G-CG----GC--AA-CGTA----TCTTGGCTTCAAGGAG----TGTGTAGTCTGGCTTGA  
TAG--GTACGATATT---AAAAA---A--CTTCTTAGAGGGACTACCT-GCCTCAAGCAG  
GCGG-AAGTCCGAGGCAATAACAGGTCTGTGATGCCCTTAGATACCTT-GGGCCGACCG  
GCGCTACAATGCAGATAGCAAAAAGGT----TCC-----TGGCCTGG-AAA---GG  
TT-GGGTAATCAATTGAATTTTCTGCGTAACTGGGATTG-ATCTTTGTAATTATTGATCA  
TCAACGAGGAATTCCTTGTAAAGCGTAAGTCATTACCTTATGCTGAATATGTCCCTGCCCT  
TTGTACACACCCGCTCGCTCCTACCGATCGAATGATACGGTAAAGTTAACGGATTG--  
-----TTTT---TTGTGG-C-AAC-ACAATTA-----AAA--TTA-AAAG--TTA  
-TT-TAAATCT--C----ATT--GTTT

>FJ424836.1 Dictyostelium purpureum\_QSp28

-----TATAAATTCTTG-TACGATGAAA---CTGCAGACGGCTCATT--ACAA--CA  
---GAT---GATAAACTG-CTAGACTTTCGG-GTTTT---AACCTTTT-GGATAACCG  
CAGTAAATCGGGGCTAATACATAGAAG-CG-ATGGG-TGACTGGC-----AAC-G-G-AA  
GCTCAGCGATTATT---A-GCG-TTA-CTA-CCAATAC--CTTC--GGGTCTTG-TGT

GAAACCGAATAATATTGCAGATCGGGG-----ATT-TATCTTCGACAAGTCTACTGT  
GTCCTGCCCTATCAACTTTCGATGGTACGGTATTGGCCCTACCATGGTTGTAACGGGTAA  
CGGGGAATTAGGGTTCGATTCCGGAGAGGGAGCCTGAGAAATGGCTACCCTTCTACGGA  
AGGCAGCAGGCGCGCAAATT-ACTCAATCCCAATAC-GGGGAAGTAGTGACAATAAATAT  
CAATACCTATCC--TT-TTTGGAGG--GCAATTGAAATGAACACAAATTAATACTTTAA  
TT-AACACAATTGGAGGCAAGTCTGGTGCCAGCAGCCGCGGTAATCCAGCTCCAA-TA  
GCATATACTAAAGTTTGCAGTTAAAA-AGC-TCGTAGTTGAAGTTAAAGTTATATT-G  
GG-CTCA-----AGTTTTTTA-CCACGTCT-----G-TGGCTAAAA----T  
AACTCCAATATTTCTTTTT-TT----AATAG-CTCAGTTTCTAGG-TCTT-----TG  
ACTCTAGTTATTTG-----GGCATTTCCTGTGAGAAAA-TTGTGGTGT  
TAAAGCA--GG-C---GTC---TC-GTCTGATCTTTTGCAGCATGGTATGATGGAACATG  
ACAT---TTTACGC--TATTGGT--GCG---TCTAAAGTGAATGATTAATAGGGAT  
GGATGGGGATGTTTCATATTGGTGGGCGAGAGGTGAAATTCGTTGACCCTATCAAGATGAA  
CTTCTGCGAAAGCATTCACTCAAACTTCCCCTAATCAAGAACGAAAGTTTGGGGATC  
GAAGACGATCAGATACCGTCTAGTCCAAACTATAAACTATGTCGACCAGGGATCGGCTA  
AA--AT-TTTTTAAAAATTTAGTCGGCACCTT-GTGAGAAATCAT-GAGTGTTTAGATTC  
CGGGGGGAGTATGGTCGCAAGTCTGAACTTAAAGGAATTGACGGAAGGGCACACAATGG  
AGTGGAG-CCTGCGGCTAATTT-GACTCAACTCGGGAAA-ACTTACCAAGCTAAGATAT  
AGTAAGGATTGACAGA-CTAA-AAGATCTTTCATGATTCTATAAGTGGTGGTGCATGGTC  
GTTCTTAG-TTGGTGGAGCGATTTGTCTGGTCAATTCCGATAACGGACGAGACCTCGACC  
TGCTAACTAGTAGTATTTATTA-GCCGATATGGGCGATAGCTTCTCTGGGGTT-TG-AGT  
G-CG---GC--AA-CGTA----TCTTGGCTTCAAGGAG---TGTGTAGTCTGGCTTGA  
TAG--GTACGATATT---AAAA---A--CTTCTTAGAGGGACTACCT-GCCTCAAGCAG  
GCGG-AAGTCCGAGGCAATAACAGGTCTGTGATGCCCTTAGATACCTT-GGGCCGACGC  
GCGCTACAATGCAGATAGCAAAAAGGT----TCC-----TGGCCTGG-AAA---GG  
TT-GGGTAATCAATTGAATTTTCTGCGTAACTGGGATTG-ATCTTTGTAATTATTGATCA  
TCAACGAGGAATTCCTTGTAAAGCTAAGTCAATACCTTATGCTGAATATGTCCTGCCCT  
TTGTACACACCGCCGTCGCTCTACCGATCGAATGATACGGTAAAGTTAACGGATTG--  
-----TTTT---TTTGTGG-C-AAC-ACAATTA-----AAA--TTA-AAAG--TTA  
-TT-TAAATCT--C----ATT--GTTT

>AY040335.1 *Dictyostelium purpureum*

TCTAAG-TATAAATCTTG-TACGATGAAA---CTGCAGACGGCTCATT--ACAA--CA  
---GT---GATAAACTG-CTAGACTTTTCGG-GTTTTT---AACCTTTT-GGATAACCG  
CAGTAAATCGGGGCTAATACATAGAAG-CG-ATGGG-TGACTGGC-----AAC-G-G-AA  
GCTCAGCGATTATT---A-GCA-TTA-CTA-CCAATAC--CTC--GGGTCTTGT-GGT  
GAAACCGAATAATATTGCAGATCGAGG-----ATT-TATCTTCGACAAGTCTACTGT  
GTCCTGCCCTATCAACTTTCGATGGTACGGTATTGGCCCTACCATGGTTGTAACGGGTAA  
CGGGGAATTAGGGTTCGATTCCGGAGAGGGAGCCTGAGAAATGGCTACCCTTCTACGGA  
AGGCAGCAGGCGCGCAAATT-ACTCAATCCCAATAC-GGGGAAGTAGTGACAATAAATAT  
CAATACCTATCC--TT-AACGGAGG--GCAATTGAAATGAACACAAATTAATACTTTAA  
TT-AACACAATTGGAGGCAAGTCTGGTGGTCCAGCAGCCGCGGTAATCCAGCTCCAA-TA  
GCATATACTAAAGTTGTTGCAGTTAAAA-AGC-TCGTAGTTGAAGTTAAAGTTTTATT-G  
GG-CTAA-----CGTTTTTTA-CCACCCT-----G-TGGCTAAAA----T  
AACTCCAATATTTCTTTTT-TT----AATAG-CTCAGTTTCTAGG-TCTT-----TG  
ACTCTAGTTATTTG-----GGCATTTCCTGTGAGAAAA-TTGTGGTGT  
TAAAGCA--GG-C---GTC---TC-GTCTGATCTTTTGCAGCATGGTATGATGGAACATG  
ACAT---TTTACGC--TATTGGT--GCG---TCTAAAGTGAATGATTAATAGGGAT  
GGATGGGGATGTTTCATATTGGTGGGCGAGAGGTGAAATTCGTTGACCCTATCAAGATGAA  
CTTCTGCGAAAGCATTCACTCAAACTTCCCCTAATCAAGAACGAAAGTTTGGGGATC  
GAAGACGATCAGATACCGTCTAGTCCAAACTATAAACTATGTCGACCAGGGATCGGCTA  
AT--AT-TTTTTAAAAATTTAGTCGGCACCTT-GTGAGAAATCAT-GAGTGTTTAGATTC  
CGGGGGGAGTATGGTCGCAAGTCTGAACTTAAAGGAATTGACGGAAGGGCACACAATGG  
AGTGGAG-CCTGCGGCTAATTT-GACTCAACTCGGGAAA-ACTTACCAAGCTAAGATAT  
AGTAAGGATTGACAGA-CTAA-AAGATCTTTCATGATTCTATAAGTGGTGGTGCATGGTC  
GTTCTTAG-TTGGTGGAGCGATTTGTCTGGTCAATTCCGATAACGGACGAGACCTCGACC  
TGCTAACTAGTAGTATTTATTA-GTCGATATAGGCGATAGCTTCTCTGGGGTT-GG-AGT  
G-CG---GC--AA-CGTA----TCTCTGCTTCAAGGAG---TGTGTAGTCTGACTTGA  
TAG--GTACGTTAAC---AAAA---A--CTTCTTAGAGGGACTACCT-GCCTCAAGCAG  
GCGG-AAGTCCGAGGCAATAACAGGTCTGTGATGCCCTTAGATACCTT-GGGCCGACGC  
GCGCTACAATGCAGATAGCAAAAAGGT----TCC-----TGGTCTGG-AAA---GA  
TT-GGGTAATCAATTGAATTTTCTGCGTAACTGGGATTG-ATCTTTGTAATTATTGATCA  
TCAACGAGGAATTCCTTGTAAAGCTAAGTCAATACCTTATGCTGAATATGTCCTGCCCT  
TTGTACACACCGCCGTCGCTCTACCGATCGAATGATACGGTAAAGTTAACGGATAG--  
-----TTTT---TTTGTGG-C-AAC-ACAATTA-----AAA--TTA-AAAG--TTA  
-TT-TAAATCT--C----ATT--GTTT

>FJ424828.1 *Dictyostelium purpureum*\_QSpU36

TCTAAG-TATAAATCTTG-TACGATGAAA---CTGCAGACGGCTCATT--ACAA--CA  
---GT---GATAAACTG-CTAGACTTTTCGG-GTTTTT---AACCTTTT-GGATAACCG  
CAGTAAATCGGGGCTAATACATAGAAG-CG-ATGGG-TGACTGGC-----AAC-G-G-AA  
GCTCAGCGATTATT---A-GCA-TTA-CTA-CCAATAC--CTC--GGGTCTTGT-GGT  
GAAACCGAATAATATTGCAGATCGAGG-----ATT-TATCTTCGACAAGTCTACTGT  
GTCCTGCCCTATCAACTTTCGATGGTACGGTATTGGCCCTACCATGGTTGTAACGGGTAA  
CGGGGAATTAGGGTTCGATTCCGGAGAGGGAGCCTGAGAAATGGCTACCCTTCTACGGA

AGGCAGCAGGCGCGCAAATT-CTCAATCCCAATAC-GGGGAAGTAGTGACAATAAATAT  
CAATACCTATCC--TT-AACGGAGG--GCAATTGAAATGAACACAAATTAATACTTTAA  
TT-AACACAATTGGAGGGCAAGTCTGGTGCCAGCAGCCGCGGTAATTCCAGCTCCAA-TA  
GCATATACTAAAGTTGTTGCAGTTAAAA-AGC-TCGTAGTTGAAGTTAAAGTTTTATT-G  
GG-CTAA-----CGTTTTTA-CCACCCT-----G-TGGCTAAAA----T  
AACTCCAATATTTCTTTTT-TT-----AATAG-CTCAGTTTCTAGG-TCTT-----TG  
ACTCTAGTTATTTG-----GGCATTTCACCTGTGAGAAAA-TTGTGGTGTT  
TAAAGCA--GG-C---GTC---TC-GTCTGATCTTTTGCAGCATGGTATGATGGAACATG  
ACAT--TTTACGC--TATTGGTTT--GCG---TCTAAAGTGTAATGATTAATAGGGAT  
GGATGGGGATGTTTCATATTGGTGGGCGAGAGGTGAAATTCGTTGACCCTATCAAGATGAA  
CTTCTGCGAAAAGCATTTCATCAATACTTCCCATTAATCAAGAACGAAAAGTTGGGGATC  
GAAGACGATCAGATACCGTCGTAGTCCAAACTATAAACTATGTCGACCAGGGATCGGCTA  
AT--AT-TTTTTTAAAAATTTAGTCGGCACCTT-GTGAGAAATCAT-GAGTGTTTATGATTC  
CGGGGGGAGTATGGTTCGCAAGTCTGAAACTTAAAGGAATTGACGGAAGGGCACACAATGG  
AGTGGAG-CCTGCGGCTTAAATTT-GACTCAACTCGGGAAA-ACTTACCAAGCTAAGATAT  
AGTAAGGATTGACAGA-CTAA-AAGATCTTTCATGATTCTATAAGTGGTGGTGCATGGTC  
GTTCTTAG-TTGGTGGAGCGATTTGTCTGGTCAATTCCGATAACGACGAGACCTCGACC  
TGCTAACTAGTAGTATTTATTA-GTCGATATAGGCGATAGCTTCTCTGGGGTT-GG-AGT  
G-CG---GC--AA-CGTA---TCTCTGCTTCAAGGAG---TGTGTAGTCTGACTTGA  
TAG--GTACGTTAAC---AAAAA---A--CTTCTTAGAGGGACTACCT-GCCTCAAGCAG  
GCGG-AAGTCCGAGGCAATAACAGGTCTGTGATGCCCTTAGATACCTT-GGGCCGCACGC  
GCGCTACAATGCAGATAGCAAAAAGGT----TCC-----TGGTCTGG-AAA---GA  
TT-GGGTAATCAATGAAATTTCTGCGTAACTGGGATTG-ATCTTTGTAATTATTGATCA  
TCAACGAGGAATTCCTTGTAAAGCTGAAAGTCAATACCTTATGCTGAATATGTCCTGCCCT  
TTGTACACACCGCCCGTCTCTACCGATCGAATGATACGGTAAAGTTAACGGATAG--  
-----TTTT---TTGTGG-C-AAC-ACAATTA-----AAA--TTA-AAAG--TTA  
-TT-TAAATCT--C---ATT--GTTT

>AM168061.1 *Dictyostelium purpureum*\_WS321

TCTAAG-TATAAATCTTG-TACGATGAAA----CTGCAGACGGCTCATT--ACAA--CA  
---GT---GATAAACTG-CTAGACTTTCGG-GTTTTT----AACCTTTT-GGATAACCG  
CAGTAAATCGGGGTAATACATAGAAG-CG-ATGGG-TGACTGGC-----AAC-G-G-AA  
GCTCAGCGATTATT----A-GCA-TTA-CTA-CCAATAC--CTTC--GGGTCTGT-GGT  
GAAACCGAATAATATTGCAGATCGAGG-----ATT-TATCTTCGGCAAGTCTACTGT  
GTCACTGCCCTATCAACTTTCGATGGTACGGTATTGGCCTACCATGGTTGTAACGGGTAA  
CGGGGAATTAGGGTTCGATTCGGAGAGGGAGCCTGAGAAATGGCTACCCTTCTACGGA  
AGGCAGCAGGCGCGCAAATT-ACTCAATCCCAATAC-GGGGAAGTAGTGACAATAAATAT  
CAATACCTATCC--TT-AACGGAGG--GCAATTGAAATGAACACAAATTAATACTTTAA  
TT-AACACAATTGGAGGGCAAGTCTGGTGCCAGCAGCCGCGGTAATTCCAGCTCCAA-TA  
GCATATACTAAAGTTGTTGCAGTTAAAA-AGC-TCGTAGTTGAAGTTAAAGTTTTATT-G  
GG-CTAA-----CGTTTTTA-CCGCTCT-----GC-GGCTAAAA----T  
AACTCCAATAATCTTTTT-TT-----AATAG-CTCAGTTTCTAGG-TCTT-----TG  
ACTCTAGTTATTTG-----GGCATTTCACCTGTGAGAAAA-TTGTGGTGTT  
TAAAGCA--GG-C---GTC---TC-GTCTGATCTTTTGCAGCATGGTATGATGGAACATG  
ACAT--TTTACGC--TATTGGTTT--GCG---TCTAAAGTGTAATGATTAATAGGGAT  
GGATGGGGATGTTTCATATTGGTGGGCGAGAGGTGAAATTCGTTGACCCTATCAAGATGAA  
CTTCTGCGAAAAGCATTTCATCAATACTTCCCATTAATCAAGAACGAAAAGTTGGGGATC  
GAAGACGATCAGATACCGTCGTAGTCCAAACTATAAACTATGTCGACCAGGGATCGGCTA  
AT--AT-TTTTTTAAAAATTTAGTCGGCACCTT-GTGAGAAATCAT-GAGTGTTTATGATTC  
CGGGGGGAGTATGGTTCGCAAGTCTGAAACTTAAAGGAATTGACGGAAGGGCACGCAATG  
AGTGGAG-CCTGCGGCTTAAATTT-GACTCAACTCGGGAAA-ACTTACCAAGCTAAGATAT  
AGTAAGGATTGACAGA-CTAA-AAGATCTTTCATGATTCTATAAGTGGTGGTGCATGGTC  
GTTCTTAG-TTGGTGGAGCGATTTGTCTGGTCAATTCCGATAACGACGAGACCTCGACC  
TGCTAACTAGTAGTATTTATG-TCAATACGGGCGATAGCTTTTCTGGGGTT-AG-AGT  
G-CG---GC--AA-CGTA---TCTCTGCTTCAAGGAG---TGTGTAGTCTGACTTGA  
TAG--GTACGTTAAC---AAAAA---A--CTTCTTAGAGGGACTACCT-GCCTCAAGCAG  
GCGG-AAGTCCGAGGCAATAACAGGTCTGTGATGCCCTTAGATACCTT-GGGCCGCACGC  
GCGCTACAATGCAGATAGCAAAAAGGT----TCC-----TGGTCTGG-AAA---GA  
TT-GGGTAATCAATGAAATTTCTGCGTAACTGGGATTG-ATCTTTGTAATTATTGATCA  
TCAACGAGGAATTCCTTGTAAAGCTGAAAGTCAATACCTTATGCTGAATATGTCCTGCCCT  
TTGTACACACCGCCCGTCTCTACCGATCGAATGATACGGTAAAGTTAACGGATAG--  
-----TTTT---TTGTGG-C-AAC-ACAATTA-----AAA--TTA-AAAG--TTA  
-TT-TAAATCT--C---ATT--GTTT

>HQ141481.1 *Dictyostelium purpureum*\_cavender

TCTA-G-TATAAATCTTG-TACGATGAAA----CTGCAGACGGCTCATT--ACAA--CA  
---GT---GATAAACTG-CTAGACTTTCGG-GTTTTT----AACCTTTT-GGATAACCG  
CAGTAAATCGGGGTAATACATAGAAG-CG-ATGGG-TGACTGGC-----AAC-G-G-AA  
GCTCAGCGATTATT----A-GCA-TTA-CTA-CCAATAC--CTTC--GGGTCTGT-GGT  
GAAACCGAATAATATTGCAGATCGAGG-----ATT-TATCTTCGACAAGTCTACTGT  
GTCACTGCCCTATCAACTTTCGATGGTACGGTATTGGCCTACCATGGTTGTAACGGGTAA  
CGGGGAATTAGGGTTCGATTCGGAGAGGGAGCCTGAGAAATGGCTACCCTTCTACGGA  
AGGCAGCAGGCGCGCAAATT-ACTCAATCCCAATAC-GGGGAAGTAGTGACAATAAATAT  
CAATACCTATCC--TT-AACGGAGG--GCAATTGAAATGAACACAAATTAATACTTTAA  
TT-AACACAATTGGAGGGCAAGTCTGGTGCCAGCAGCCGCGGTAATTCCAGCTCCAA-TA

GCATATACTAAAGTTGTTGCAGTTAAAA-AGC-TCGTAGTTGAAGTTAAAGTTTTATT-G  
GG-CTAA-----CGTTTTTA-CCGCTCT-----GCTGGCTAAAA---T  
AACTCCAATAAATCTTTTT-TT-----AATAG-CTCAGTTTCTAGG-TCTT-----TG  
ACTCTAGTTAATTTG-----GGCATTTCAGTGTGAGAAAA-TTGTGGTGTT  
TAAAGCA--GG-C---GTC---TC-GTCTGATCTTTTGCAGCATGGTATGATGGAACATG  
ACAT---TTTACGC--TATTGGTTT--GCG---TCTAAAGTGAATGATTAATAGGGAT  
GGATGGGGATGTTTCATATTGGTGGGCGAGAGGTGAAATTCGTTGACCCTATCAAGATGAA  
CTTCTGCGAAAGCATTTCATAAATACTTCCCATTAATCAAGAACGAAAGTTTGGGGATC  
GAAAGCAGATCAGATACCGTCGTAGTCCAAACTATAAACTATGTCCGACCAGGGATCGGCTA  
AT--AT-TTTTTTAAAAATTTAGTCGGCACCTT-GTGAGAAATCAT-GAGTGTTTAGATTC  
CGGGGGGAGTATGGTCGCAAGTCTGAACTTAAAGGAATTGACGGAAGGGCACACAATGG  
AGTGGAG-CCTGCGGCTTAATTT-GACTCAACTCGGAAAA-ACTTACCAAGCTAAGATAT  
AGTAAGGATTGACAGA-CTAA-AAGATCTTTCATGATTCTATAAGTGGTGGTGCATGGTC  
GTTCTTAG-TTGGTGGAGCGATTTGTCTGGTCAATTCCGATAACGGACGAGACCTCGACC  
TGCTAACTAGTAGTATTTATTG-GTCAATACGGGCGATAGCTTTTCTGGGGTT-AG-AGT  
G-CG---GC--AA-CGTA---TCTCTGCTTCAAGGAG---TGTGTAGTCTGACTTGA  
TAG--GTACGTTAAC---AAAA-----CTTCTAGAGGGACTACCT-GCCTCAAGCAG  
GCGG-AAGTCCGAGGCAATAACAGGTCTGTGATGCCCTTAGATACCTT-GGGCCGCACGC  
GCGCTACAATGCAGATAGCAAAAAAGGT----TCC-----TGGTCTGG-AAA---GA  
TT-GGGTAATCAATGAAATTTTCTGCGTAACTGGGATTG-ATCTTTGTAATTATTGATCA  
TCAACGAGGAATTCCTTGTAAAGCGTAAGTCATTACCTTATGCTGAATATGTCCCTGCCCT  
TTGTACACACCGCCCGTCTCTACCGATCGAATGATACGGTAAAGTTAACGGATAG--  
-----TTTT---TTTGTGG-C-AAC-ACAATTA-----AAAA-TTA-AAAG--TTA  
-TT-TAAATCT--C----ATT--GTTT

>AM168060.1 *Dictyostelium purpureum* C143

TCTAAG-TATAAATCTTG-TACGATGAAA---CTGCAGACGGCTCATT--ACAA--CA  
---GT---GATAAACTG-CTAGACTTTCGG-GTTTTT---AACCTTTT-GGATAACCG  
CAGTAAATCGGGGCTAATACATAGAAG-CG-ATGGG-TGACTGGC-----AAC-G-G-AA  
GCTCAGCGATTATT---A-GCA-TTA-CTA-CCAATAC--CTTC--GGGTCTTGT-GGT  
GAAACCGAATAATATTGCAGATCGAGG-----ATT-TATCTTCGACAAGTCTACTGT  
GTCACTGCCCTATCAACTTTCGATGGTACGGTATTGGCCTACCATGGTTGTAACGGGTAA  
CGGGGAATTAGGGTTCGATTCCGGAGAGGGAGCCTGAGAAAATGGCTACCACTTCTACGGA  
AGGCAGCAGGCGCGCAAATT-ACTCAATCCCAATAC-GGGGAAGTAGTGACAATAAATAT  
CAATACCTATCC--TT-TTTGGAGG--GCAATTGAAATGAACACAAATTAATACTCTTAA  
TT-AACACAATTGGAGGGCAAGTCTGGTGCCAGCAGCCGCGGTAATTCAGCTCCAA-TA  
GCATATACTAAAGTTGTTGCAGTTAAAA-AGC-TCGTAGTTGAAGTTAAAGTTTTATT-G  
GG-CTA-----AGTTTTTTA-CCACTA-----G-TGGCTAAAA---C  
AACTCCAATAAATCTTTTT-TT-----AATAG-CTCAGTTTCTAGG-TCTT-----TG  
ACTCTAGTTAATTTG-----GGCATTTCAGTGTGAGAAAA-TTGTGGTGTT  
TAAAGCA--GG-C---GTC---TC-GTCTGATCTTTTGCAGCATGGTATGATGGAACATG  
ACAT---TTTACGC--TATTGGTTT--GCG---TCTAAAGTGAATGATTAATAGGGAT  
GGATGGGGATGTTTCATATTGGTGGGCGAGAGGTGAAATTCGTTGACCCTATCAAGATGAA  
CTTCTGCGAAAGCATTTCATAAATACTTCCCATTAATCAAGAACGAAAGTTTGGGGATC  
GAAGACGATCAGATACCGTCGTAGTCCAAACTATAAACTATGTCCACCAGGGATCGGTTA  
AA--AT-TTTTTTAAAAATTTAGTCCGGCACCTT-GTGAGAAATCAT-GAGTGTTTAGATTC  
CGGGGGGAGTATGGTCGCAAGTCTGAAA-TTAAAGGAATTGACGGAAGGGCACACAATGG  
AGTGGAG-CCTGCGGCTTAATTT-GACTCAACTCGGAAAA-ACTTACCAAGCTAAGATAT  
AGTAAGGATTGACAGA-CTAA-AAGATCTTTCATGATTCTATAAGTGGTGGTGCATGGTC  
GTTCTTAG-TTGGTGGAGCATTGTCTGGTCAATTCCGATAACGGACGAGACCTCGACC  
TGCTAACTAGTAGTATTTATTA-GTCAATATGGGCGATAGCTTTTCTGGGATTTAG-AGC  
GATT---TC--GGTCGTT---TCT-GGTTTCAAGGAG---TGTGTAGTCTGACTTGA  
TAG--GTACGAATTA---AAAA---A--CTTCTAGAGGGACTACCT-GCCTCAAGCAG  
GCGG-AAGTCCGAGGCAATAACAGGTCTGTGATGCCCTTAGATACCTT-GGGCCGCACGC  
GCGCTACAATGTATAAAACAAAAAGGT----TCC-----TGGTCCGG-AAG---GA  
TT-GGGTAATCAATGAAATTTTCTACGTAACTGGGATTG-ATCTTTGTAATTATTGATCA  
TAAACGAGGAATTCCTTGTAAAGCGAGGTCAATACCTGTGCTGAATATGTCCCTGCCCT  
TTGTACACACCGCCCGTCTCTACCGATCGAATGATACGGTAAAGTTAACGGATAG--  
-----TTTT--ATCTTTGG-C-AAC-ATTGATA-----TAAA-TTA-AAAG--TTA  
-TT-TAAATCT--C----ATT--GTTT

>MK322959.1 *Dictyostelium barbarae* 1\_5

TCTAAG-TATAAATCTTG-TACGATGAAA---CTGCAGACGGCTCATT--ACAA--CA  
---GT---GATAAACTA-ATAGACTTTCGG-GTTTTT---AACCTTTT-GGATAACCG  
CAGTAAATCGGGGCTAATACATACAAG-CG-ATGGG-TGACTGGC-----AAC-G-G-AA  
GCTCAGCGATTATT---A-GCA-TTA-CTA-CCAATAC--CTTC--GGGTCTTGT-GGT  
GAAACCGAATAATATTGCAGATCGAGG-----ATT-TATCTTCGACAAGTCTACTGT  
GTCACTGCCCTATCAACTTTCGATGGTACGGTATTGGCCTACCATGGTTGTAACGGGTAA  
CGGGGAATTAGGGTTCGATTCCGGAGAGGGAGCCTGAGAAAATGGCTACCACTTCTACGGA  
AGGCAGCAGGCGCGCAAATT-ACTCAATCCCAATAC-GGGGAAGTAGTGACAATAAATAT  
CAATACCTATCC--TT-AACGGAGG--GCAATTGAAATGAACACAAATTAATACTCTTAA  
TT-AACACAATTGGAGGGCAAGTCTGGTGCCAGCAGCCGCGGTAATTCAGCTCCAA-TA  
GCATATACTAAAGTTGTTGCAGTTAAAA-AGC-TCGTAGTTGAAGTTAAAGTTTTACT-G  
GG-CTAA-----AGTTAATTTG-CCACTCT-----GGTGGTTAAAT---C  
AACTCCAGTATTCCTTTTT-TT-----AATAG-CTCTGCTTCTAGCATCTT-----TG

ATGTTAGTTGTTT-----GGCATTTCCTGTGAGAAAA-TTGTGGTGT  
TAAAGCA--GG-C---GTC---TC-GCCTGATCTTTGCAGCATGGTATGATGAAACATG  
ACAT---TTTACGC--TATTGGTTT--GCG----TCTAAAAGTGTAATGATTAATAGGGAT  
GGATGGGGGTGTTTCATATTGGTGGGCGAGAGGTGAAATTCGTTGACCCTATCAAGATGAA  
CTTCTGCGAAAGCATTACCAAAATACTTCCCATTAAATCAAGAACGAAAGTTTGGGGATC  
GAAGACGATCAGATACCGTCGTAGTCCAAACTATAAACTATGTCGACCAGGGATCGGTCA  
AA--AT-TTTTTTAAAAATTTGATCGGCACCTT-GTGAGAAATCAT-GAGTGTTTAGATTC  
CGGGGGGAGTATGGTCGCAAGTCTGAAACTTAAAGGAATTGACGGAAGGGCACACAATGG  
AGTGGAG-CCTGCGGCTAATTT-GACTCAACTCGGGAAA-ACTTACCAAGCTAAGATAT  
AGTAAGGATTGACAGA-CTAA-AAGATCTTTCATGATTCTATAAGTGGTGGTGCATGGTC  
GTTCTTAG-TTGGTGGAGCGATTTGTCTGGTCAATCCGATAACGGACGAGACCTCGACC  
TGCTAACTAGTAGTATTTATTA-GCCGATATGGGCGATAGCTTCTCTGGGGTTTGG-AAT  
GATT---TC--GGTCATC---TCC-TACTTCAAGGAG---TGTGTAGTCTGGCTTGA  
TAG--GTACGAATTA---AAAAA-----CTTCTTAGAGGGACTACCT-GCCTCAAGCAG  
GCGG-AAGTCCGAGGCAATAACAGGTCTGTGATGCCCTTAGATACCTT-GGGCCGCACGC  
GCGCTACAATGTAGAAAACAAAAAGGC-----TCC-----TGGTCCGG-AAG---GA  
TT-GGGTAATCATTGAAATTTCTACGTAACCTGGGATTG-ATCTTTGTAATTATTGATCA  
TCAACGAGGAATTCCTTGTAAAGCGCAGGTCATTACCCTGTGCTGAATATGTCCTGCCC  
TTGTACACACCCCGTCGCTCCTACCGATCGAATGATACGGTAAAGTTAACGGATCG--  
-----TTTT--ATCTGTGG-C-AAC-ACTGATA-----TAAA-CTA-AAAG--TTA  
-TT-TAAATCT--C---ATT--GTTT

>MK322958.1 *Dictyostelium insulinitivitis*

TCTAAG-TATAAATCTTG-TACGATGAAA----CTGCAGACGGCTCATT--ACAA--CA  
---GT---GATAAACTA-ATAGACTTTCGG-GTTTTT---AACCTTTT-GGATAACCG  
CAGTAAATCGGGGCTAATACATACAAG-CG-ATGGG-TGACTGGC-----AAC-G-G-AA  
GCTCAGCGATTATT---A-GCA-TTA-CTA-CCAATAC--CTC--GGGTCTGT-GGT  
GAAACCGAATAATATGACATCGAGG-----ATT-TATCTTCGACAAGTCTACTGT  
GTCACTGCCCTAACAATTTCGATGGTACGGTATTGGCCTACCATGGTGTAAACGGGTAA  
CGGGGAATTAGGGTTCGATTCCGGAGAGGGAGCCTGAGAAATGGCTACCCTTCTACGGA  
AGGCAGCAGGCGCGCAAATT-ACTCAATCCCAATAC-GGGGAAGTAGTGACAATAAATAT  
CAATACCTATCC--TT-AACGGAGG--GCAATTGAAATGAACACAAATTAATACTTTAA  
TT-AACACAATTGGAGGGCAAGTCTGGTGCAGCAGCCGCGTAAATCCAGCTCCAA-TA  
GCATATACTAAAGTTGTTGAGTTAAAA-AGC-TCGTAGTTGAAGTTAAAGGTTTACT-G  
GG-CTAA-----AGTTATTG-CCACTCT-----GGTGGTAAAT---C  
AACTCCAGTATTCTTTTT-TT----AATAG-CTCTGCTTCTAGCATCTT-----TG  
ATGTTAGTTGTTT-----GGCATTTCCTGTGAGAAAA-TTGTGGTGT  
TAAAGCA--GG-C---GTC---TC-GCCTGATCTTTGCAGCATGGTATGATGAAACATG  
ACAT---TTTACGC--TATTGGTTT--GCG----TCTAAAAGTGTAATGATTAATAGGGAT  
GGATGGGGGTGTTTCATATTGGTGGGCGAGAGGTGAAATTCGTTGACCCTATCAAGATGAA  
CTTCTGCGAAAGCATTACCAAAATACTTCCCATTAAATCAAGAACGAAAGTTTGGGGATC  
GAAGACGATCAGATACCGTAGTCCAAACTATAAACTATGTCGACCAGGGATCGGTCA  
AA--AT-TTTTTTAAAAATTTGATCGGCACCTT-GTGAGAAATCAT-GAGTGTTTAGATTC  
CGGGGGGAGTATGGTCGCAAGTCTGAAACTTAAAGGAATTGACGGAAGGGCACACAATGG  
AGTGGAG-CCTGCGGCTAATTT-GACTCAACTCGGGAAA-ACTTACCAAGCTAAGATAT  
AGTAAGGATTGACAGA-CTAA-AAGATCTTTCATGATTCTATAAGTGGTGGTGCATGGTC  
GTTCTTAG-TTGGTGGAGCGATTTGTCTGGTCAATCCGATAACGGACGAGACCTCGACC  
TGCTAACTAGTAGTATTTATTA-GCCGATATGGGCGATAGCTTCTCTGGGGTTTGG-AAT  
GATT---TC--GGTCATC---TCC-TACTTCAAGGAG---TGTGTAGTCTGGCTTGA  
TAG--GTACGAATTA---AAAAA-----CTTCTTAGAGGGACTACCT-GCCTCAAGCAG  
GCGG-AAGTCCGAGGCAATAACAGGTCTGTGATGCCCTTAGATACCTT-GGGCCGCACGC  
GCGCTACAATGTAGAAAACAAAAAGGC-----TCC-----TGGTCCGG-AAG---GA  
TT-GGGTAATCATTGAAATTTCTACGTAACCTGGGATTG-ATCTTTGTAATTATTGATCA  
TCAACGAGGAATTCCTTGTAAAGCGCAGGTCATTACCCTGTGCTGAATATGTCCTGCCC  
TTGTACACACCCCGTCGCTCCTACCGATCGAATGATACGGTAAAGTTAACGGATCG--  
-----TTTT--ATCTGTGG-C-AAC-ACTGATA-----TAAA-CTA-AAAG--TTA  
-TT-TAAATCT--C---ATT--GTTT

>AM168049.1 *Dictyostelium macrocephalum* B33

TCTAAG-TATAAATCTTG-TACGATGAAA----CTGCAGACGGCTCATT--ACAA--CA  
---GT---GATAAACTA-ATAGACTTTCGG-GTTTTT---AACCTTTT-GGATAACCG  
CAGTAAATCGGGGCTAATACATACAAG-CG-ATGGG-TGACTGGC-----AAC-G-G-AA  
GCTCAGCGATTATT---A-GCA-TTA-CTA-CCAATAC--CTC--GGGTCTGT-GGT  
GAAACCGAATAATATGACATCGAGG-----ATT-TATCTTCGACAAGTCTACTGT  
GTCACTGCCCTAACAATTTCGATGGTACGGTATTGGCCTACCATGGTGTAAACGGGTAA  
CGGGGAATTAGGGTTCGATTCCGGAGAGGGAGCCTGAGAAATGGCTACCCTTCTACGGA  
AGGCAGCAGGCGCGCAAATT-ACTCAATCCCAATAC-GGGGAAGTAGTGACAATAAATAT  
CAATACCTATCC--TT-AACGGAGG--GCAATTGAAATGAACACAAATTAATACTTTAA  
TT-AACACAATTGGAGGGCAAGTCTGGTGCAGCAGCCGCGTAAATCCAGCTCCAA-TA  
GCATATACTAAAGTTGTTGAGTTAAAA-AGC-TCGTAGTTGAAGTTAAAGGTTTACT-G  
GG-CTAA-----AGTTATTG-CCACTCT-----GGTGGTAAAT---C  
AACTCCAGTATTCTTTTT-TT----AATAG-CTCTGCTTCTAGCATCTT-----TG  
ATGTTAGTTGTTT-----GGCATTTCCTGTGAGAAAA-TTGTGGTGT  
TAAAGCA--GG-C---GTC---TC-GCCTGATCTTTGCAGCATGGTATGATGAAACATG  
ACAT---TTTACGC--TATTGGTTT--GCG----TCTAAAAGTGTAATGATTAATAGGGAT

GGATGGGGGTGTTTCATATTGGTGGGCGAGAGGTGAAATTCGTTGACCCATCAAGATGAA  
CTTCTGCGAAAGCATTACCAAATACTTCCCATAATCAAGAACGAAAGTTGGGGATC  
GAAAGACGATCAGATACCGTCGTAGTCCAAACTATAAACTATGTCGACCAGGGATCGGTCA  
AA--AT-TTTTTTAAAATTTGATCGGCACCTT-GTGAGAAATCAT-GAGTGTTTAGATTC  
CGGGGGGAGTATGGTGCAGAGTCTGAACTTAAAGGAATTGACGGAAGGGCACACAATGG  
AGTGGAG-CCTGCGGCTTAATTT-GACTCAACTCGGGAAA-ACTTACCAAGCTAAGATAT  
AGTAAGGATTGACAGA-CTAA-AAGATCTTTCATGATTCTATAAGTGGTGGTGCATGGTC  
GTTCTTAG-TTGGTGGAGCGATTTGTCTGGTCAATTCCGATAACGGACGAGACCTCGACC  
TGCTAACTAGTAGTATTTATTA-GCCGATATGGGCGATAGCTTCTCTGGGGTTTG-AAT  
GATT---TC--GGTCATC---TCC-TATTTCAAGGAG---TGTGTAGTCTGGCTTGA  
TAG--GTACGAATTA---AAAAA-----CTTCTTAGAGGGACTACCT-GCCTCAAGCAG  
GCGG-AAGTCCGAGGCAATAACAGGTCTGTGATGCCCTTAGATACCTT-GGGCCGCACGC  
GCGCTACAATGTAGAAAACAAAAAGGC-----TCC-----TGGTCCGG-AAG--GA  
TT-GGGTAATCATTGAAATTTCTACGTAACCTGGGATTG-ATCTTTGTAATTATTGATCA  
TCAACGAGGAATTCCTTGAAGCGCAGGTCAATTACCCTGTGCTGAATATGTCCTGCCCT  
TTGTACACACCGCCCGTCTCTACCGATCGAATGATACGGTAAAGTTAACAGATCG--  
-----TTTT--ATCTGTGG-C-AAC-ACTGATA-----TAAA-CTA-AAAG--TTA  
-TT-TAAATCT--C----ATT--GTTT

>MG490371.1 Dictyostelium multiforme 4009

-----TATAAATCTTG-TACGATGAAA----CTGCAGACGGCTCATT--ACAA--CA  
---GT---GATAAACTA-ATAGACTTTCGG-GTTTTT---AACCTTTT-GGATAACCG  
CAGTAAATCGGGGCTAATACATAGAAG-CG-ATGGG-TGACTGGC-----AAC-G-G-AA  
GCTCAGCGATTATT---A-GCA-TTA-CTA-CCAATAC--CTTC--GGGTCTGT-GGT  
GAAACCGAATAATATTGCAGATCGAGG-----ATT-TATCTTCGACAAGTCTACTGT  
GTCACTGCCCTATCAACTTTCGATGGTACGGTATTGGCCTACCATGGTTGTAACGGGTAA  
CGGGGAATTAGGGTTCGATTCCGGAGAGGGAGCCTGAGAAATGGCTACCACTTCTACGGA  
AGGCAGCAGGCGCGCAAAAT-ACTCAATCCCAATAC-GGGGAAGTAGTGACAATAAATAT  
CAATACCTATCC--TT-AACGGAGG--GCAATTGAAATGAACACAAAATAAAACCTTAA  
TT-AACACAATTGGAGGGCAAGTCTGGTGCAGCAGCCGCGTAAATCCAGCTCCAA-TA  
GCATATACTAAAGTTGTTGCAGTAAAAA-AGC-TCGTAGTTGAAGTTAAAGGTTTACT-G  
GG-CTAA-----AGTTATTTG-CCGCTCT-----GGTGGTTAAAT---C  
AACTCCAGTATCTCTTTTTT-TT----AATAG-TTCAGTCTTATTATCTT-----TG  
ATAGTAGTTGTTT-----GACATTTCACTGTGAGAAAA-TTGTGGTGTT  
TAAAGCA--GG-C--GTT--TC-GCCTGATCTTTGCAGCATGGTATGATGAAACATG  
ACAT--TTTACGC--TATTGGTT--GCG----TCTAAAGTGTAATGATTAATAGGGAT  
GGATGGGGGTGTTTCATATTGGTGGGCGAGAGGTGAAATTCGTTGACCCATCAAGATGAA  
CTTCTGCGAAAGCATTACCAAATACTTCCCATAATCAAGAACGAAAGTTGGGGATC  
GAAGACGATCAGATACCGTCGTAGTCCAAACTATAAACTATGTCGACCAGGGATCGGTAA  
AA--AT-TTTTTTAAAATTTAATCGGCACCTT-GTGAGAAATCAC-GAGTGTTTAGATTC  
CGGGGGGAGTATGGTGCAGTCTGAACTTAAAGGAATTGACGGAAGGGCACACAATGG  
AGTGGAG-CCTGCGGCTTAATTT-GACTCAACTCGGGAAA-ACTTACCAAGCTAAGATAT  
AGTAAGGATTGACAGA-CTAA-AAGATCTTTCATGATTCTATAAGTGGTGGTGCATGGTC  
GTTCTTAG-TTGGTGGAGCGATTTGTCTGGTCAATTCCGATAACGGACGAGACCTCGACC  
TGCTAACTAGTAGTATTTATTA-GTCAATATGGGCGATAGCTTCTCTGGGGTTTG-AAT  
GTT---TC--GGCCATC---TCC-TGCTTCAAGGAG---TGTGTAGTCTGACTTGA  
TAG--GTACGAATTA---AAAAA-----CTTCTTAGAGGGACTACCT-GCCTCAAGCAG  
GCGG-AAGTCCGAGGCAATAACAGGTCTGTGATGCCCTTAGATACCTT-GGGCCGCACGC  
GCGCTACAATGTAGAAAACAAAAAGGT-----TCC-----TGGTCCGG-AAG--GA  
TT-GGGTAATCATTGAAATTTCTACGTAACCTGGGATTG-ATCTTTGTAATTATTGATCA  
TCAACGAGGAATTCCTTGAAGCGTAGGTCAATTACCCTATGCTGAATATGTCCTGCCCT  
TTGTACACACCGCCCGTCTCTACCGATCGAATGATACGGTAAAGTTAACGGATCG--  
-----TTTT--ATCTTTGG-C-AAC-ATTGATA-----TAAA-CTA-AAA--TTA  
-TT-TAAATCT--C----ATT--GTTT

>MG490370.1 Dictyostelium multiforme 4007

TCTAAG-TATAAATCTTG-TACGATGAAA----CTGCAGACGGCTCATT--ACAA--CA  
---GT---GATAAACTA-ATAGACTTTCGG-GTTTTT---AACCTTTT-GGATAACCG  
CAGTAAATCGGGGCTAATACATAGAAG-CG-ATGGG-TGACTGGC-----AAC-G-G-AA  
GCTCAGCGATTATT---A-GCA-TTA-CTA-CCAATAC--CTTC--GGGTCTGT-GGT  
GAAACCGAATAATATTGCAGATCGAGG-----ATT-TATCTTCGACAAGTCTACTGT  
GTCACTGCCCTATCAACTTTCGATGGTACGGTATTGGCCTACCATGGTTGTAACGGGTAA  
CGGGGAATTAGGGTTCGATTCCGGAGAGGGAGCCTGAGAAATGGCTACCACTTCTACGGA  
AGGCAGCAGGCGCGCAAAAT-ACTCAATCCCAATAC-GGGGAAGTAGTGACAATAAATAT  
CAATACCTATCC--TT-AACGGAGG--GCAATTGAAATGAACACAAAATAAAACCTTAA  
TT-AACACAATTGGAGGGCAAGTCTGGTGCAGCAGCCGCGTAAATCCAGCTCCAA-TA  
GCATATACTAAAGTTGTTGCAGTAAAAA-AGC-TCGTAGTTGAAGTTAAAGGTTTACT-G  
GG-CTAA-----AGTTATTTG-CCGCTCT-----GGTGGTTAAAT---C  
AACTCCAGTATCTCTTTTTT-TT----AATAG-TTCAGTCTTATTATCTT-----TG  
ATAGTAGTTGTTT-----GACATTTCACTGTGAGAAAA-TTGTGGTGTT  
TAAAGCA--GG-C--GTT--TC-GCCTGATCTTTGCAGCATGGTATGATGAAACATG  
ACAT--TTTACGC--TATTGGTT--GCG----TCTAAAGTGTAATGATTAATAGGGAT  
GGATGGGGGTGTTTCATATTGGTGGGCGAGAGGTGAAATTCGTTGACCCATCAAGATGAA  
CTTCTGCGAAAGCATTACCAAATACTTCCCATAATCAAGAACGAAAGTTGGGGATC  
GAAGACGATCAGATACCGTCGTAGTCCAAACTATAAACTATGTCGACCAGGGATCGGTAA

AA--AT-TTTTTTAAAAATTAATCGGCACCTT-GTGAGAAATCAC-GAGTGTTTAGATTC  
CGGGGGGAGTATGGTCGCAAGTCTGAACTTAAAGGAATTGACGGAAGGGCACACAATGG  
AGTGGAG-CCTGCGGCTTAATTT-GACTCAACTCGGGAAA-ACTTACCAAGCTAAGATAT  
AGTAAGGATTGACAGA-CTAA-AAGATCTTTCATGATTCTATAAGTGGTGGTGCATGGTC  
GTTCTTAG-TTGGTGGAGCGATTTGTCTGGTCAATTCCGATAACGGACGAGACCTCGACC  
TGCTAACTAGTAGTATTTATTA-GTCAATATGGGCGATAGCTTCTCTGGGGTTGG-AAT  
GGTT---TC--GGCCATC---TCC-TGCTTCAAGGAG---TGTGTAGTCTGACTTGA  
TAG--GTACGAATTA---AAAAA-----CTTCTTAGAGGGACTACCT-GCCTCAAGCAG  
GCGG-AAGTCCGAGGCAATAACAGGTCTGTGATGCCCTTAGATACCTT-GGGCCGCACGC  
GCGCTACAATGTAGAAAAAATAAAGGT-----TCC-----TGGTCCGG-AAG---GA  
TT-GGGTAATCATTTGAATTTTCTACGTAACCTGGGATTG-ATCTTTGTAATTATTGATCA  
TCAACGAGGAATTCCTTGTAAGCGTAGGTCATTACCCTATGCTGAATATGTCCTGCCCT  
TTGTACACACCGCCCGTCTCTACCGATCGAATGATACGGTAAAGTTAACGGATCG--  
-----TTTT--ATCTTTGG-C-AAC-ATTGATA-----TAAA-CTA-AAA--TTA  
-TT-TAAATCT--C----ATT--GTTT

>MG490369.1 Dictyostelium\_minimum

TCTAAG-TATAAATCTTG-TACGATGAAA---CTGCAGACGGCTCATT--ACAA--CA  
---GT---GATAAACTA-ATAGACTTTCGG-GTTTTT---AACCTTTT-GGATAACCG  
CAGTAAATCGGGGCTAATACATAGAAG-CG-ATGGG-TGACTGGC-----AAC-G-G-AA  
GCTCAGCGATTATT---A-GCA-TTA-CTA-CCAATAC--CTTC--GGGTCTTGT-GGT  
GAAACCGAATAATATTGCAGATCGAGG-----ATT-TATCTTCGACAAGTCTACTGT  
GTCACTGCCCTATCAACTTTCGATGGTACGGTATTGGCCTACCATGGTTGTAACGGGTAA  
CGGGGAATTAGGGTTCGATTCCGGAGAGGGAGCCTGAGAAATGGCTACCATTCTACGGA  
AGGCAGCAGGCGCGCAAATT-ACTCAATCCCAATAC-GGGGAAGTAGTGACAATAAATAT  
CAATACCTATCC--TT-AACGGAGG--GCAATTGAAATGAACACAAATTAATACTTTAA  
TT-AACACAATTGGAGGGCAAGTCTGGTGCCAGCAGCCGCGGTAATTCCAGCTCCAA-TA  
GCATATACTAAAGTTGTTGCAGTAAAA-AGC-TCGTAGTTGAAGTTAAAGGTTTACT-G  
GG-CTAA-----AGTTATTTG-CCGCTCT-----GGTGGTTAAAT---C  
AACTCCAGTATCTCTTTTT-TT----AATAG-TTCAGCTTCTATTATCTT-----TG  
ATAGTAGTTGTTG-----GACATTTCACTGTGAGAAAA-TTGTGGTGT  
TAAAGCA--GG-C---GTT---TC-GCCTGATCTTTTGCAGCATGGTATGATGAAACATG  
ACAT---TTTACGC--TATTGGTTT--GCG---TCTAAAGTGAATGATTAATAGGGAT  
GGATGGGGGTGTTTCATATTGGTGGGCGAGAGGTGAAATTCGTTGACCCTATCAAGATGAA  
CTTCTGCGAAAGCATTACCAAATACTTCCCATAATCAAGAACGAAAGTTTGGGGATC  
GAAGACGATCAGATACCGTCGTAGTCCAAACTATAAACTATGTCGACCAGGGATCGGTTA  
AA--AT-TTTTTTAAAAATTAATCGGCACCTT-GTGAGAAATCAC-GAGTGTTTAGATTC  
CGGGGGGAGTATGGTCGCAAGTCTGAACTTAAAGGAATTGACGGAAGGGCACACAATGG  
AGTGGAG-CCTGCGGCTTAATTT-GACTCAACTCGGGAAA-ACTTACCAAGCTAAGATAT  
AGTAAGGATTGACAGA-CTAA-AAGATCTTTCATGATTCTATAAGTGGTGGTGCATGGTC  
GTTCTTAG-TTGGTGGAGCGATTTGTCTGGTCAATTCCGATAACGGACGAGACCTCGACC  
TGCTAACTAGTAGTATTTATTA-GTCAATATGGGCGATAGCTTCTCTGGGGTTGG-AAT  
GGTT---TC--GGCCATC---TCC-TGCTTCAAGGAG---TGTGTAGTCTGACTTGA  
TAG--GTACGAATTA---AAAAA-----CTTCTTAGAGGGACTACCT-GCCTCAAGCAG  
GCGG-AAGTCCGAGGCAATAACAGGTCTGTGATGCCCTTAGATACCTT-GGGCCGCACGC  
GCGCTACAATGTAGAAAAAATAAAGGT-----TCC-----TGGTCCGG-AAG---GA  
TT-GGGTAATCATTTGAATTTTCTACGTAACCTGGGATTG-ATCTTTGTAATTATTGATCA  
TCAACGAGGAATTCCTTGTAAGCGTAGGTCATTACCCTATGCTGAATATGTCCTGCCCT  
TTGTACACACCGCCCGTCTCTACCGATCGAATGATACGGTAAAGTTAACGGATCG--  
-----TTTT--ATCTTTGG-C-AAC-ATTGATA-----TAAA-CTA-AAA--TTA  
-TT-TAAATCT--C----ATT--GTTT

>AM168053.1 Dictyostelium\_mucoroides\_TNS\_C\_114

TCTAAG-TATAAATCTTG-TACGATGAAA---CTGCAGACGGCTCATT--ACAA--CA  
---GT---GATAAACTA-ATAGACTTTCGG-GTTTTT---AACCTTTT-GGATAACCG  
CAGTAAATCGGGGCTAATACATAGAAG-CG-ATGGG-TGACTGGC-----AAC-G-G-AA  
GCTCAGCGATTATT---A-GCA-TTA-CTA-CCAATAC--CTTC--GGGTCTTGT-GGT  
GAAACCGAATAATATTGCAGATCGAGG-----ATT-TATCTTCGACAAGTCTACTGT  
GTCACTGCCCTATCAACTTTCGATGGTACGGTATTGGCCTACCATGGTTGTAACGGGTAA  
CGGGGAATTAGGGTTCGATTCCGGAGAGGGAGCCTGAGAAATGGCTACCATTCTACGGA  
AGGCAGCAGGCGCGCAAATT-ACTCAATCCCAATAC-GGGGAAGTAGTGACAATAAATAT  
CAATACCTATCC--TT-AACGGAGG--GCAATTGAAATGAACACAAATTAATACTTTAA  
TT-AACACAATTGGAGGGCAAGTCTGGTGCCAGCAGCCGCGGTAATTCCAGCTCCAA-TA  
GCATATACTAAAGTTGTTGCAGTAAAA-AGC-TCGTAGTTGAAGTTAAAGGTTTACT-G  
GG-CTAA-----AGTTATTTG-CCGCTCT-----GGTGGTTAAAT---C  
AACTCCAGTATCTCTTTTT-TT----AATAG-TTCAGCTTCTATTATCTT-----TG  
ATAGTAGTTGTTG-----GACATTTCACTGTGAGAAAA-TTGTGGTGT  
TAAAGCA--GG-C---GTT---TC-GCCTGATCTTTTGCAGCATGGTATGATGAAACATG  
ACAT---TTTACGC--TATTGGTTT--GCG---TCTAAAGTGAATGATTAATAGGGAT  
GGATGGGGGTGTTTCATATTGGTGGGCGAGAGGTGAAATTCGTTGACCCTATCAAGATGAA  
CTTCTGCGAAAGCATTACCAAATACTTCCCATAATCAAGAACGAAAGTTTGGGGATC  
GAAGACGATCAGATACCGTCGTAGTCCAACT-----  
-----TC  
CGGGGGGAGTATGGTCGCAAGTCTGAACTTAAAGGAATTGACGGAAGGGCACACAATGG  
AGTGGAG-CCTGCGGCTTAATTT-GACTCAACTCGGGAAA-ACTTACCAAGCTAAGATAT



AGTAAGGATTGACAGA-CTAA-AAGATCTTTCATGATTCTATAAGTGGTGGTGCATGGTC  
GTTCTTAG-TTGGTGGAGCGATTTGTCTGGTCAATCCGATAACGACGACGACCTCGACC  
TGCTAACTAGTAGTATTTATTA-GTCAATATGGGGGATAGCTTCTCTGGGGTTTGG-AAT  
GGTT----TC--GGCCATC----TCC-TGCTTCAAGGAG----TGTGTAGTCTGACTTGA  
TAG--GTACGAATTA---AAAAA-----CTTCTTAGAGGGACTACCT-GCCTCAAGCAG  
GCGG-AAGTCCGAGGCAATAACAGGTCTGTGATGCCCTTAGATACCTT-GGGCCGCACGC  
GCGCTACAATGTAGAAAAA-----TCC-----TGGTCCGG-AAG---GA  
TT-GGGTAATCATTGAAATTTTCTACGTAACGGGATTG-ATCTTTGTAATTATTGATCA  
TCAACGAGGAATTCCTTGTAAAGCGTAGGTCATTACCCTATGCTGAATATGTCCCTGCCCT  
TTGTACACACCCCGTCTCTACCGATCGAATGATACGGTAAAGTTAACGGATCG--  
-----TTTT--ATCTTTGG-C-AAC-ATTGATA-----TAAA-CTA-AAAG--TTA  
-TT-TAAATCT--C----ATT--GTTT

>AM168065.1 Dictyostelium rosarium\_M45

TCTAAG-TATAAATCTTTG-TACGATGAAA----CTGCAGACGGCTCATT--ACAA--CA  
---GT---GATAAACTA-ATAGACTTTCGG-GTTTTT----AACCTTTT-GGATAACCG  
CAGTAAATCGGGGCTAATACATAGAAG-CG-ATGGG-CGACTGGC-----AAC-G-G-AA  
GCTCAGCGATTATT---A-GCA-TTA-CTA-CCAATAC--CTTC--GGGTCTTGT-GGT  
GAAACCGAATAATATTGCAGATCGAGG-----ATT-TATCTTCGACAAGTCTACTGT  
GTCAGTCCCCTATCAACTTTCGATGGTACGGTATTGGCCTACCATGGTGTAAACGGGTAA  
CGGGGAATTAGGGTTCGATTCGGAGAGGGAGCCTGAGAAAATGGCTACCCTTCTACGGA  
AGGCAGCAGGCGCGCAAATT-ACTCAATCCCAATAC-GGGGAAGTAGTGACAATAAATAT  
CAATACCTATCC--TT-AACGGAGG--GCAATTGAAATGAACACAAAATTAACCTTAA  
TT-AACACAATTGGAGGGCAAGTCTGGTCCAGCAGCCGCGGTAATCCAGCTCCAA-TA  
GCATATACTAAAGTTGTTGCAGTTAAAA-AGC-TCGTAGTTGAAGTTAAAGGTTACT-G  
GG-CTAA-----AGTTATTG-CCGCTCT-----GGTGGTTAAAT----C  
AACTCCAGTATCTTTTTT-TT----AATAG-TTCAGCTTCTATTATCTT-----TG  
ATAGTAGTTGTTT-----GACATTTCACTGTGAGAAAA-TTGTGGTGT  
TAAAGCA--GG-C---GTT---TC-GCCTGATCTTTTGCAGCATGGTATGATGAAACATG  
ACAT---TTTACGC--TATTGGTTT--GCG----TCTAAAGTGAATGATTAATAGGGAT  
GGATGGGGGTGTTCAATTGGTGGGCGAGAGGTGAAATTCGTTGACCCTATCAAGATGAA  
CTTCTGCGAAAGCATTCCCAAATACTTCCCATTAAATCAAGAACGAAAGTTTGGGGATC  
GAAGACGATCAGATACCGTCTAGTCCAAACTATAAACTATGTCGACCAGGGATCGGTTA  
AA--AT-TTTTTAAAAATTAATCGGCACCTT-GTGAGAAATCAC-GAGTGTGTTAGATTC  
CGGGGGGAGTATGGTGCAGAGTCTGAACTTAAAGGAATTGACGGAAGGGCACACAATGG  
AGTGGAG-CCTGCGGCTTAATTT-GACTCAACTCGGGAAA-ACTTACCAAGCTAAGATAT  
AGTAAGGATTGACAGA-CTAA-AAGATCTTTCATGATTCTATAAGTGGTGGTGCATGGTC  
GTTCTTAG-TTGGTGGAGCGATTTGTCTGGTCAATTCCGATAACGGACGACCTCGACC  
TGCTAACTAGTAGTATTTATTA-GTCAATATGGGGGATAGCTTCTCTGGGGTTTGG-AAT  
GGCT----TC--GGTCATC----TCC-TGCTTCAAGGAG----TGTGTAGTCTGACTTGA  
TAG--GTACGAATTA---AAAAA-----CTTCTTAGAGGGACTACCT-GCCTCAAGCAG  
GCGG-AAGTCCGAGGCAATAACAGGTCTGTGATGCCCTTAGATACCTT-GGGCCGCACGC  
GCGCTACAATGTAGAAAAA-----TCC-----TGGTCCGG-AAG---GA  
TT-GGGTAATCATTGAAATTTTCTACGTAACGGGATTG-ATCTTTGTAATTATTGATCA  
TCAACGAGGAATTCCTTGTAAAGCGTAGGTCATTACCCTATGCTGAATATGTCCCTGCCCT  
TTGTACACACCCCGTCTCTACCGATCGAATGATACGGTAAAGTTAACGGATCG--  
-----TTTT--ATCTTTGG-C-AAC-ATTGATA-----TAAA-CTA-AAAG--TTA  
-TT-TAAATCT--C----ATT--GTTT

>AM168068.1 Dictyostelium sphaerocephalum\_GR11

TCTAAG-TATAAATCTTTG-TACGATGAAA----CTGCAGACGGCTCATT--ACAA--CA  
---GT---GATAAACTA-ATAGACTTTCGG-GTTTTT----AACCTTTT-GGATAACCG  
CAGTAAATCGGGGCTAATACATAGAAG-CG-ATGGG-TGACTGGC-----AAC-G-G-AA  
GCTCAGCGATTATT---A-GCA-TTA-CTA-CCGATAC--CTTC--GGGTCTTGT-GGT  
GAAACCGAATAATATTGCAGATCGAGG-----ATT-TATCTTCGACAAGTCTACTGT  
GTAACCTGCCCTATCAACTTTCGATGGTACGGTATTGGCCTACCATGGTGTAAACGGGTAA  
CGGGGAATTAGGGTTCGATTCGGAGAGGGAGCCTGAGAAAATGGCTACCCTTCTACGGA  
AGGCAGCAGGCGCGCAAATT-ACTCAATCCCAATAC-GGGGAAGTAGTGACAATAAATAT  
CAATACCTATCC--TT-AACGGAGG--GCAATTGAAATGAACACAAAATTAACCTTAA  
TT-AACACAATTGGAGGGCAAGTCTGGTCCAGCAGCCGCGGTAATCCAGCTCCAA-TA  
GCATATACTAAAGTTGTTGCAGTTAAAA-AGC-TCGTAGTTGAAGTTAAAGGTTACT-G  
GG-CTAA-----AGTTATTG-CCGCTCT-----GGTGGTTAAAT----C  
AACTCCAGTATCTTTTTT-TT----AATAG-TTCAGCTTCTATTATCTT-----TG  
ATAGTAGTTGTTT-----GACATTTCACTGTGAGAAAA-TTGTGGTGT  
TAAAGCA--GG-C---GTT---TC-GCCTGATCTTTTGCAGCATGGTATGATGAAACATG  
ACAT---TTTACGC--TATTGGTTT--GCG----TCTAAAGTGAATGATTAATAGGGAT  
GGATGGGGGTGTTCAATTGGTGGGCGAGAGGTGAAATTCGTTGACCCTATCAAGATGAA  
CTTCTGCGAAAGCATTCCCAAATACTTCCCATTAAATCAAGAACGAAAGTTTGGGGATC  
GAAGACGATCAGATACCGTCTAGTCCAAACTATAAACTATGTCGACCAGGGATCGGTTA  
AA--AT-CTTTTTAAAAATTAATCGGCACCTT-GTGAGAAATCAC-GAGTGTGTTAGATTC  
CGGGGGGAGTATGGTGCAGAGTCTGAACTTAAAGGAATTGACGGAAGGGCACACAATGG  
AGTGGAG-CCTGCGGCTTAATTT-GACTCAACTCGGGAAA-ACTTACCAAGCTAAGATAT  
AGTAAGGATTGACAGA-CTAA-AAGATCTTTCATGATTCTATAAGTGGTGGTGCATGGTC  
GTTCTTAG-TTGGTGGAGCGATTTGTCTGGTCAATTCCGATAACGGACGACCTCGACC  
TGCTAACTAGTAGTATTTATTA-GTCAATATGGGGGATAGCTTCTCTGGGGTTTGG-AAT

GGTT----TC--GGCCATC----TCC-TGCTTCAAGGAG----TGTGTAGTCTGACTTGA  
TAG--GTACGAATTA---AAAAA-----CTTCTTAGAGGGACTACCT-GCCTCAAGCAG  
GCGG-AAGTCCGAGGCAATAACAGGTCTGTGATGCCCTTAGATACCTT-GGGCCGCACGC  
GCGCTACAATGTAGAAAACAAAAAGGT----TCC-----TGGTCCGG-AAG---GA  
TT-GGGTAATCATTGAAATTTCTACGTAACGGGATTG-ATCTTTGTAATTATTGATCA  
TCTACGAGGAATTCCTGTAAGCGTAGGTCATTACCCTATGCTGAATATGTCCCTGCCCT  
TTGTACACACCGCCGCTCCTACCGATCGAATGATACGGTAAAGTTAACGGATCG--  
-----TTTT--ATCTTTGG-C-AAC-ATTGATA-----TAAA-CTA-AAAG--TTA  
-TT-TAAATCT--C----ATT--GTTT  
>HQ141479.1 Dictyostelium quercibrachium\_NZ201B  
TCTAAG-TATAAATTCCTG-TACGATGAAA----CTGCAGACGGCTCATT--ACAA--CA  
---GT----GATAAACTA-ATAGACTTTCGG-GTTTTT----AACCTTTT-GGATAACCG  
CAGTAAATCGGGGCTAATACATAGAAG-CG-ATGGG-TGACTGGC----AAC-G-G-AA  
GCTCAGCGATTATT----A-GCA-TTA-CTA-CCAATAC--CTTC--GGGTCTGT-GGT  
GAAACCGAATAATATTGCAGATCGAGG-----ATT-TATCTTCGACAAGTCTACTGT  
GTCACTGCCCTATCAACTTTCGATGGTACGGTATTGGCCTACCATGGTTGTAACGGGTAA  
CGGGGAATTAGGGTTCGATTCCGGAGAGGGAGCCTGAGAAATGGCTACCACTTCTACGGA  
AGGCAGCAGGCGCGCAAATT-ACTCAATCCCAATAC-GGGGAAGTAGTGACAATAAATAT  
CAATACCTATCC--TT-AACGGAGG--GCAATTGAAATGAACACAAAATAAAACCTTAA  
TT-AACACAATTTGGAGGCAAGTCTGGTGCCAGCAGCCGCGTAATTCCAGCTCCAA-TA  
GCATATACTAAAGTTGTTGCAGTAAAA-AGC-TCGTAGTTGAAGTTAAAGGTTTACT-G  
GG-CTAA-----AGTTATTTG-CCGCTCT-----GGTGGTTAAAT----C  
AACTCCAGTATCTTTTTT-TT----AATAG-TTCAGCTTCTATTATCTT-----TG  
ATAGTAGTTGTTT-----GACATTTCACTGTGAGAAAA-TTGTGGTGTT  
TAAAGCA--GG-C---GTT---TC-GCCTGATCTTTTGCAGCATGGTATGATGGAACATG  
ACAT--TTTACGC--TATTGGTT--GCG---TCTAAAGTGTAATGATTAATAGGGAT  
GGATGGGGGTGTTCAATTGGTGGGCGAGAGGTGAAATTCGTTGACCCTATCAAGATGAA  
CTTCTGCGAAAAGCATTACCAAAATACTTCCCATAATCAAGAACGAAAGTTTGGGGATC  
GAAGACGATCAGATACCGTCGTAGTCCAAACTATAAACTATGTGACACAGGGATCGGTAA  
AA--AT-TTTTTAAAAATTTAATCGGCACCTT-GTGAGAAATCAC-GAGTGTTTAGATTC  
CGGGGGGAGTATGGTTCGAAAGTCTGAAACTTAAAGGAATTGACGGAAGGGCACACAATGG  
AGTGGAG-CCTGCGGCTTAATTT-GACTCAACTCGGGAAA-ACTTACCAAGCTAAGATAT  
AGTAAGGATTGACAGA-CTAA-AAGATCTTTCATGATTCTATAAGTGGTGGTGCATGGTC  
GTTCTTAG-TTGGTGGAGCGATTTGTCTGGTCAATTCCGATAACGGACGAGACCTCGACC  
TGCTAACTAGTAGTATTTATTA-GTCAATATGGGCGATAGCTTCTCTGGGGTTTGG-AAT  
GGTT---TC--GGCCATC----TCC-TGCTTCAAGGAG----TGTGTAGTCTGACTTGA  
TAG--GTACGAATTA---AAAAA-----CTTCTTAGAGGGACTACCT-GCCTCAAGCAG  
GCGG-AAGTCCGAGGCAATAACAGGTCTGTGATGCCCTTAGATACCTT-GGGCCGCACGC  
GCGCTACAATGTAGAAAACAAAAAGGT----TCC-----TGGTCCGG-AAG---GA  
TT-GGGTAATCAATGAAATTTCTACGTAACGGGATTG-ATCTTTGTAATTATTGATCA  
TCAACGAGGAATTCCTGTAAGCGTAGGTCATTACCCTATGCTGAATATGTCCCTGCCCT  
TTGTACACACCGCCGCTCCTACCGATCGAATGATACGGTAAAGTTAACGGATCG--  
-----TTTT--ATCTGTGG-C-AAC-ACTGATA-----TAAA-CTA-AAAG--TTA  
-TT-TAAATCT--C----ATT--GTT-  
>AM168034.1 Dictyostelium clavatum\_TNS\_C\_189  
TCTAAG-TATAAATTTTTG-TACGATGAAA----CTGCAGACGGCTCATT--ACAA--CA  
---GT----GATAAACTA-ATAGACTTTCGG-GTTTTT----AACCTTTT-GGATAACCG  
CAGTAAATCGGGGCTAATACATAGAAG-CG-ATGGG-TGACTGGC----AAC-G-G-AA  
GCTCAGCGATTATT----A-GCA-TTA-CTA-CCAATAC--CTTC--GGGTCTGT-GGT  
GAAACCGAATAATATTGCAGATCGAGG-----ATT-TATCTTCGACAAGTCTACTGT  
GTCACTGCCCTATCAACTTTCGATGGTACGGTATTGGCCTACCATGGTTGTAACGGGTAA  
CGGGGAATTAGGGTTCGATTCCGGAGAGGGAGCCTGAGAAATGGCTACCACTTCTACGGA  
AGGCAGCAGGCGCGCAAATT-ACTCAATCCCAATAC-GGGGAAGTAGTGACAATAAATAT  
CAATACCTATCC--TT-AACGGAGG--GCAATTGAAATGAACACAAAATAAAACCTTAA  
TT-AACACAATTTGGAGGGCAAGTCTGGTGCCAGCAGCCGCGTAATTCCAGCTCCAA-TA  
GCATATACTAAAGTTGTTGCAGTAAAA-AGC-TCGTAGTTGAAGTTAAAGGTTTACT-G  
GG-CTAA-----AGTTATTTG-CCGCTCT-----GGTGGTTAAAT----C  
AACTCCAGTATCTTTTTT-TT----AATAG-TTCAGCTTCTATTATCTT-----TG  
ATAGTAGTTGTTT-----GACATTTCACTGTGAGAAAA-TTGTGGTGTT  
TAAAGCA--GG-C---GTT---TC-GCCTGATCTTTTGCAGCATGGTATGATGGAACATG  
ACAT--TTTACGC--TATTGGTT--GCG---TCTAAAGTGTAATGATTAATAGGGAT  
GGATGGGGGTGTTCAATTGGTGGGCGAGAGGTGAAATTCGTTGACCCTATCAAGATGAA  
CTTCTGCGAAAAGCATTACCAAAATACTTCCCATAATCAAGAACGAAAGTTTGGGGATC  
GAAGACGATCAGATACCGTCGTAGTCCAAACTATAAACTATGTGACACAGGGATCGGTAA  
AA--AT-TTTTTAAAAATTTAATCGGCACCTT-GTGAGAAATCAC-GAGTGTTTAGATTC  
CGGGGGGAGTATGGTTCGAAACTTAAAGGAATTGACGGAAGGGCACACAATGG  
AGTGGAG-CCTGCGGCTTAATTT-GACTCAACTCGGGAAA-ACTTACCAAGCTAAGATAT  
AGTAAGGATTGACAGA-CTAA-AAGATCTTTCATGATTCTATAAGTGGTGGTGCATGGTC  
GTTCTTAG-TTGGTGGAGCGATTTGTCTGGTCAATTCCGATAACGGACGAGACCTCGACC  
TGCTAACTAGTAGTATTTATTA-GTCAATATGGGCGATAGCTTCTCTGGGGTTTGG-AAT  
GGTT---TC--GGCCATC----TCC-TGCTTCAAGGAG----TGTGTAGTCTGACTTGA  
TAG--GTACGAATTA---AAAAA-----CTTCTTAGAGGGACTACCT-GCCTCAAGCAG  
GCGG-AAGTCCGAGGCAATAACAGGTCTGTGATGCCCTTAGATACCTT-GGGCCGCACGC

GCGCTACAATGTAGAAAAACAAAAGGT----TCC-----TGGTCCGG-AAG--GA  
TT-GGGTAATCAATTGAATTTTCTACGTAACCTGGGATTG-ATCTTTGTAATTATTGATCA  
TCAACGAGGAATTCCTTGTAAGCGTAGGTCATTACCCTATGCTGAATATGTCCTGCCCT  
TTGTACACACCGCCCGTCTCTACCGATCGAATGATACGGTAAAGTTAACGGATCG--  
-----TTTT--ATCTGTGG-C-AAC-ACTGATA-----TAAA-CTA-AAAG--TTA  
-TT-TAAATCT--C----ATT--GTTT  
>AM168035.1 Dictyostelium clavatum\_TNS\_C\_220  
TCTAAG-TATAAATCTTG-TACGATGAAA----CTGCAGACGGCTCATT--ACAA--CA  
---GT---GATAAACTA-ATAGACTTTCGG-GTTTTT----AACCTTTT-GGATAACCG  
CAGTAAATCGGGGTAATACATAGAAG-CG-ATGGG-TGACTGGC-----AAC-G-G-AA  
GCTCAGCGATTATT---A-GCA-TTA-CTA-CCAATAC--CTTC--GGGTCTGT-GGT  
GAAACCGAATAATATTGCAGATCGAGG-----ATT-TATCTTCGACAAGTCTACTGT  
GTCACTGCCCTATCAACTTTCGATGGTACGGTATTGGCCTACCATGGTTGTAACGGGTAA  
CGGGGAATTAGGGTTCGATTCCGGAGAGGGAGCCTGAGAAATGGCTACCCTTCTACGGA  
AGGCAGCAGGCGCGCAAATT-ACTCAATCCCAATAC-GGGGAAGTAGTGACAATAAATAT  
CAATCCCTATCC--TT-AACGGAGG--GCAATTGAAATGAACACAAATTAATACTTTAA  
TT-AACACAATTGGAGGGCAAGTCTGGTGCCAGCAGCCGCGGTAATTCCAGCTCAA-TA  
GCATATACTAAAGTTGTTGCAGTTAAAA-AGC-TCGTAGTTGAAGTTAAAGGTTTACT-G  
GG-CTAA-----AGTTATTTG-CCGCTCT-----GGTGGTTAAAT----C  
AACTCCAGTATCTCTTTTT-TT----AATAG-TTCAGCTTCTATTATCTT-----TG  
ATAGTAGTTGTTG-----GACATTTCACTGTGAGAAAA-TTGTGGTGTT  
TAAAGCA--GG-C---GTT---TC-GCCTGATCTTTGCAGCATGGTATGATGGAACATG  
ACAT---TTTACGC--TATTGGTT--GCG----TCTAAAGTGTAATGATTAATAGGGAT  
GGATGGGGGTGTTTCATATTGGTGGGCGAGAGGTGAAATTCGTTGACCCTATCAAGATGAA  
CTTCTGCGAAAGCATTACCAAACTTCCCATTAATCAAGAACGAAAGTTTGGGGATC  
GAAGACGATCAGATACCGTCGTAGTCCAACTATAAACTATGTCGACCAGGGATCGGTTA  
AA--AT-TTTTTTAAAAATTAATCGGCACCTT-GTGAGAAATCAC-GAGTGTTTAGATTC  
CGGGGGGAGTAGTGGTCGAAAGTCTGAAACTTAAAGGAATTGACGGAAGGGCACACAATGG  
AGTGGAG-CCTGCGGCTTAATTT-GACTCAACTCGGAAAA-ACTTACCAAGCTAAGATAT  
AGTAAGGATTGACAGA-CTAA-AAGATCTTTCATGATTCTATAAATGGTGGTGCATGGTC  
GTTCTTAG-TTGGTGGAGCGATTGTTCTGGTCAATTCCGATAACGGACGAGACCTCGACC  
TGCTAACTAGTAGTATTTATTA-GTCAATATGGGCGATAGCTTCTGTTGGGTTTGG-AAT  
GGCT----GC--GGTCATC----TCC-TGCTTCAAGGAG----TGTGTAGTCTGACTTGA  
TAG--GTACGAATTA---AAAA-----CTTCTTAGAGGGACTACCT-GCCTCAAGCAG  
GCGG-AAGTCCGAGGCAATAACAGGTCTGTGATGCCCTTAGATACCTT-GGGCCGCACGC  
GCGCTACAATGTAGAAAAACAAAAGGT----TCC-----TGGTCCGG-AAG--GA  
TT-GGGTAATCAATTGAATTTTCTACGTAACCTGGGATTG-ATCTTTGTAATTATTGATCA  
TCAACGAGGAATTCCTTGTAAGCGTAGGTCATTACCCTATGCTGAATATGTCCTGCCCT  
TTGTACACACCGCCCGTCTCTACCGATCGAATGATACGGTAAAGTTAACGGATCG--  
-----TTTT--ATCTGTGG-C-AAC-ACTGATA-----TAAA-CTA-AAAG--TTA  
-TT-TAAATCT--C----ATT--GTTT  
>AM168048.1 Dictyostelium longosporum\_TNS\_C\_109  
TCTAAG-TATAAATCTTG-TACGATGAAA----CTGCAGACGGCTCATT--ACAA--CA  
---GT---GATAAACTA-ATAGACTTTCGG-GTTTTT----AACCTTTT-GGATAACCG  
CAGTAAATCGGGGTAATACATAGAAG-CG-ATGGG-TGACTGGC-----AAC-G-G-AA  
GCTCAGCGATTATT---A-GCA-TTA-CTA-CCAATAC--CTTC--GGGTCTGT-GGT  
GAAACCGAATAATATTGCAGATCGAGG-----ATT-TATCTTCGACAAGTCTACTGT  
GTCACTGCCCTATCAACTTTCGATGGTACGGTATTGGCCTACCATGGTTGTAACGGGTAA  
CGGGGAATTAGGGTTCGATTCCGGAGAGGGAGCCTGAGAAATGGCTACCCTTCTACGGA  
AGGCAGCAGGCGCGCAAATT-ACTCAATCCCAATAC-GGGGAAGTAGTGACAATAAATAT  
CAATACCTATCC--TT-AACGGAGG--GCAATTGAAATGAACACAAATTAATACTTTAA  
TT-AACACAATTGGAGGGCAAGTCTGGTGCCAGCAGCCGCGGTAATTCCAGCTCAA-TA  
GCATATACTAAAGTTGTTGCAGTTAAAA-AGC-TCGTAGTTGAAGTTAAAGGTTTACT-G  
GG-CTAA-----AGTTATTTG-CCGCTCT-----GGTGGTTAAAT----C  
AACTCCAGTATCTCTTTTT-TT----AATAG-TTCAGCTTCTATTATCTT-----TG  
ATAGTAGTTGTTG-----GACATTTCACTGTGAGAAAA-TTGTGGTGTT  
TAAAGCA--GG-C---GTT---TC-GCCTGATCTTTGCAGCATGGTATGATGGAACATG  
ACAT---TTTACGC--TATTGGTT--GCG----TCTAAAGTGTAATGATTAATAGGGAT  
GGATGGGGGTGTTTCATATTGGTGGGCGAGAGGTGAAATTCGTTGACCCTATCAAGATGAA  
CTTCTGCGAAAGCATTACCAAACTTCCCATTCATCAAGAACGAAAGTTTGGGGATC  
GAAGACGATCAGATACCGTCGTAGTCCAACTATAAACTATGTCGACCAGGGATCGGTTA  
AA--AT-TTTTTTACAAATTTAATCCGCACCTT-GTGAGAAATCAC-GAGTGTTTAGATTC  
CGGGGGGAGTAGTGGTCGAAAGTCTGAAA-TTAAAGGAATTGACGGAAGGGCACACAATGG  
AGTGGAG-CCTGCGGCTTAATTT-GACTCAACTCGGAAAA-ACTTACCAAGCTAAGATAT  
AGTAAGGATTGACAGA-CTAA-AAGATCTTTCATGATTCTATAAAGTGGTGGTGCATGGTC  
GTTCTTAG-TTGGTGGAGCGATTGTTCTGGTCAATTCCGATAACGGACGAGACCTCGACC  
TGCTAACTAGTAGTATTTATTA-GTCAATATGGGCGATAGCTTCTGTTGGGTTTGG-AAT  
GGCT----TC--GGTCATC----TCC-TGCTTCAAGGAG----TGTGTAGTCTGACTTGA  
TAG--GTACGAATTA---AAAA-----CTTCTTAGAGGGACTACCT-GCCTCAAGCAG  
GCGG-AAGTCCGAGGCAATAACAGGTCTGTGATGCCCTTAGATACCTT-GGGCCGCACGC  
GCGCTACAATGTAGAAAAACAAAAGGT----TCC-----TGGTCCGG-AAG--GA  
TT-GGGTAATCAATTGAATTTTCTACGTAACCTGGGATTG-ATCTTTGTAATTATTGATCA  
TCAACGAGGAATTCCTTGTAAGCGTAGGTCATTACCCTATGCTGAATATGTCCTGCCCT

TTGTACACACCCGCCGTCGCTCTACCGATCGAATGATACGGTAAAAGTTAACGGATCG--  
-----TTTT--ATCTGTGG-C-AAC-ACTGATA-----TAAA-CTA-AAAG--TTA  
-TT-TAAATCT--C----ATT--GTTT  
>HQ141478.1\_Dictyostelium\_ammophilum\_KBK4A  
TCTAAG-TATAAATCTTG-TACGATGAAA----CTGCAGACGGCTCATT--ACAA--CA  
---GT---GATAAACTA-ATAGACTTTCGG-GTTTTT----AACCTTTT-GGATAACCG  
CAGTAAATCGGGGCTAATACATAGAAG-CG-ATGGG-TGACTGGC-----AAC-G-G-AA  
GCTCAGCGATTATT---A-GCA-TTA-CTA-CCAATAC--CTTC--GGGTCTTGT-GGT  
GAAACCGAATAATATTGCAGATCGAGG-----ATT-TATCTTCGACAAGTCTACTGT  
GTCACTGCCCTATCAACTTTCGATGGTACGGTATTGGCCTACCATGGTTGTAACGGGTAA  
CGGGGAATTAGGGTTCGATTCCGGAGAGGGAGCCTGAGAAAATGGCTACCACTTCTACGGA  
AGGCAGCAGGCGCGCAAATT-ACTCAATCCCAATAC-GGGGAAGTAGTGACAATAAATAT  
CAATACCTATCC--TT-AACGGAGG--GCAATTGAAATGAACACAAATAAAACCTTAA  
TT-AACACAATTGGAGGGCAAGTCTGGTGGCAGCAGCCGCGGTAATCCAGCTCCAA-TA  
GCATATACTAAAGTTGTTGCAGTTAAAA-AGC-TCGTAGTTGAAGTTAAAGGTTTACT-G  
GG-CTAA-----AGTTATTG-CCGCTCT-----GGTGGTTAAAT----A  
TACTCCAGTATCTTTTTT-TT-----AATAG-TTCAGCTTCTATTATCTT-----TG  
ATAGTAGTTGTTT-----GACATTTCACTGTGAGAAAA-TTGTGGTGT  
TAAAGCA--GG-C---GTT---TC-GCCTGATCTTTTGCAGCATGGTATGATGGAACATG  
ACAT---TTTACGC--TATTGGTTT--GCG---TCTAAAGTGAATGATTAATAGGGAT  
GGATGGGGGTGTTCAATTGGTGGGCGAGAGGTGAAATTCGTTGACCCTATCAAGATGAA  
CTTCTGCGAAAGCATTACCAAATACTTCCCATAATCAAGAACGAAAGTTTGGGGATC  
GAAGACGATCAGATACCGTCTAGTCCAAACTATAAACTATGTCGACCAGGGATCGGTTA  
AA--AT-TTTTTTAAAAATTAATCGGCACCTT-GTGAGAAAATCAC-GAGTGTTTAGATT  
CGGGGGGAGTATGGTGCAGAGTCTGAACTTAAAGGAATTGACGGAAGGGCACACAATGG  
AGTGGAG-CCTGCGGCTAATTT-GACTCAACTCGGGAAA-ACTTACCAAGCTAAGATAT  
AGTAAGGATTGACAGA-CTAA-AAGATCTTTCATGATTCTATAAGTGGTGGTGCATGGTC  
GTTCTTAG-TTGGTGGAGCGATTGTCTGGTCAATTCCGATAACGGACGACCTCGACC  
TGCTAACTAGTAGTATTTATTA-GTCAATATGGGCGATAGCTTTCTGGGGTTTGG-AAT  
GATT---TC--GGTCATC---TCC-TGCTTCAAGGAG---TGTGTAGTCTGACTTGA  
TAG--GTACGAATTA---AAAAA-----CTTCTTAGAGGGACTACCT-GCCTCAAGCAG  
GCGG-AAGTCCGAGGCAATAACAGGTCTGTGATGCCCTTAGATACCTT-GGGCCGCACGC  
GCGCTACAATGTAGAAAACAAAAAGGT-----TCC-----TGGTCCGG-AAG---GA  
TT-GGGTAATCAATTGAATTTTCTACGTAACCTGGGATTG-ATCTTTGTAATTATTGATCA  
TCAACGAGGAATTCCTTGTAAAGCGTAGGTCATTACCCTATGCTGAATATGTCCTGCCCT  
TTGTACACACCCCGCTCGCTCTACCGATCGAATGATACGGTAAAAGTTAACGGATCG--  
-----TTTT--ATCTGTGG-C-AAC-ACTGATA-----TAAA-CTA-AAAG--TTA  
-TT-TAAATCT--C----AT---GTT-  
>GQ496155.1\_Dictyostelium\_valdivianum  
TCTAAG-TATAAATCTTG-TACGATGAAA----CTGCAGACGGCTCATT--ACAA--CA  
---GT---GATAAACTA-ATAGACTTTCGG-GTTTTT----AACCTTTT-GGATAACCG  
CAGTAAATCGGGGCTAATACATAGAAG-CG-ATGGG-TGACTGGC-----AAC-G-G-AA  
GCTCAGCGATTATT---A-GCA-TTA-CTA-CCAATAC--CTTC--GGGTCTTGT-GGT  
GAAACCGAATAATATTGCAGATCGAGG-----ATT-TATCTTCGACAAGTCTACTGT  
GTCACTGCCCTATCAACTTTCGATGGTACGGTATTGGCCTACCATGGTTGTAACGGGTAA  
CGGGGAATTAGGGTTCGATTCCGGAGAGGGAGCCTGAGAAAATGGCTACCACTTCTACGGA  
AGGCAGCAGGCGCGCAAATT-ACTCAATCCCAATAC-GGGGAAGTAGTGACAATAAATAT  
CAATACCTATCC--TT-AACGGAGG--GCAATTGAAATGAACACAAATAAAACCTTAA  
TT-AACACAATTGGAGGGCAAGTCTGGTGGCAGCAGCCGCGGTAATCCAGCTCCAA-TA  
GCATATACTAAAGTTGTTGCAGTTAAAA-AGC-TCGTAGTTGAAGTTAAAGGTTTACT-G  
GG-CTAA-----AGTTATTG-CCGCTCT-----GGTGGTTAAAT----C  
AACTCCAGTATCTTTTTT-TT-----AATAG-TTCAGCTTCTATTATCTT-----TG  
ATAGTAGTTGTTT-----GACATTTCACTGTGAGAAAA-TTGTGGTGT  
TAAAGCA--GG-C---GTT---TC-GCCTGATCTTTTGCAGCATGGTATGATGGAACATG  
ACAT---TTTACGC--TATTGGTTT--GCG---TCTAAAGTGAATGATTAATAGGGAT  
GGATGGGGGTGTTCAATTGGTGGGCGAGAGGTGAAATTCGTTGACCCTATCAAGATGAA  
CTTCTGCGAAAGCATTACCAAATACTTCCCATAATCAAGAACGAAAGTTTGGGGATC  
GAAGACGATCAGATACCGTCTAGTCCAAACTATAAACTATGTCGACCAGGGATCGGTTA  
AA--AT-TTTTTTAAAAATTAATCGGCACCTT-GTGAGAAAATCAC-GAGTGTTTAGATT  
CGGGGGGAGTATGGTGCAGAGTCTGAACTTAAAGGAATTGACGGAAGGGCACACAATGG  
AGTGGAG-CCTGCGGCTAATTT-GACTCAACTCGGGAAA-ACTTACCAAGCTAAGATAT  
AGTAAGGATTGACAGA-CTAA-AAGATCTTTCATGATTCTATAAGTGGTGGTGCATGGTC  
GTTCTTAG-TTGGTGGAGCGATTGTCTGGTCAATTCCGATAACGGACGAGACCTCGACC  
TGCTAACTAGTAGTATTTATTA-GTCAATATGGGCGATAGCTTCTGGGGTTTGG-AAT  
GACT---TC--GGTCATC---TCC-TGCTTCAAGGAG---TGTGTAGTCTGACTTGA  
TAG--GTACGAATTA---AAAAA-----CTTCTTAGAGGGACTACCT-GCCTCAAGCAG  
GCGG-AAGTCCGAGGCAATAACAGGTCTGTGATGCCCTTAGATACCTT-GGGCCGCACGC  
GCGCTACAATGTAGAAAACAAAAAGGT-----TCC-----TGGTCCGG-AAG---GA  
TT-GGGTAATCAATTGAATTTTCTACGTAACCTGGGATTG-ATCTTTGTAATTATTGATCA  
TCAACGAGGAATTCCTTGTAAAGCGTAGGTCATTACCCTATGCTGAATATGTCCTGCCCT  
TTGTACACACCCCGCTCGCTCTACCGATCGAATGATACGGTAAAAGTTAACGGATCG--  
-----TTTT--ATCTGTGG-C-AAC-ACTGATA-----TAAA-CTA-AAAG--TTA  
-TT-TAAATCT--C----AT---GTT-

>AM168066.1 Dictyostelium septentrionale\_IY49

TCTAAG-TATAAGTTCTTG-TACGATGAAA----CTGCAGACGGCTCATT--ACAA--CA  
---GT---GATAAACTA-TTAGACTTTCGG-GTTTTT-----ACCTTTT-GGATAACCG  
CAGTAAATCGGGGCTAATACATAGAAG-CG-ATGGG-TAACTGGC-----AAC-G-G-AA  
GCTCAGCGATTATT---A-GCA-T---CTA-TCAATAC--CTTC--GGGTCTTG-T-GGT  
GAAACCGAATAATATGCAGATCGAAG-----ATT-TATCTTCGACAAGTCTATTGT  
GTAACCTGCCCTAACAATTTCGATGGTACGGTATTGGCCTACCATGGTTGTAACGGGTAA  
CGGGGAATTAGGGTTCGATTCCGGAGAGGGAGCCTGAGAAATGGCTACCACTTCTACGGA  
AGGCAGCAGGCGCGCAAATT-ACTCAATCCCAATAC-GGGGAAGTAGTGACAATAAATAT  
CAATGCCTATCC--TT-AACGGAGG--GCAATTGAAATGAACACAAAATAAAACCTTAA  
TT-AACACAATTGGAGGGCAAGTCTGGTGCCAGCAGCCGCGTAATTCCAGCTCCAA-TA  
GCATATACTAAAAGTTGTTGCAGTTAAAA-AGC-TCGTAGTTGAAGTCAAAGGTTTGTC-G  
GG-TCAA-----AGTTGTTTCCGCTCT-----GGTGGTAAAT---A  
TACTCCGGCATCTCTTTTT-TT-----AATAG-TTCTGCTTGCTATCTT-----TG  
ATGGTACTTGTTG-----AACAGTTCACCGTGAGAAAA-TTGTGGTGT  
CAAAGCA--GG-C---GTT--TC-GCCTGATCTTTTGCAGCATGGTATGATGAAACATG  
ACAT---TTACGC--TATTGGTTT--GCG----TCTAGAGTGAATGATTAATAGGGAT  
GGATGGGGGTGTTCAATTTGGTGGGCGAGAGGTGAAATTCGTTGACCCTATCAAGATGAA  
CTTCTGCGAAAGCATTCCCAAATCTTCTCCATTAATCAAGAACGAAAGTTGGGGATC  
GAAAGCAGATCAGATACCGTCTAGTCCAAACTATAAACTATGTCGACCAGGGATCGGTAA  
AA--AT-TTTTTAAAAATTAATCGGCACCTT-GTGAGAAATCAC-GAGTGTTAGATT  
CGGGGGGAGTATGGTGCAGAGTCTGAACTTAAAGGAATTGACGGAAGGGCACACAATGG  
AGTGGAG-CCTGCGGCTTAATTT-GACTCAACTCGGAAA-ACTTACCAAGCTAAGATAT  
AGTAAGGATTGACAGA-CTAA-AAGATCTTTCATGATTCTATAAGTGGTGGTGCATGGTC  
GTTCTTAG-TTGGTGGAGCGATTTGTCTGGTCAATTCCGATAACGGACGAGACCTCGACC  
TGCTAACTAGTAGTGTATTTTCGCCAATATGGGCGATAGCTTTTTGGGATTCG-GTT  
CATT---TC--GGTGGAT---TCG-GGTTTCAGGGAG---TGTGTAGTCTGGTGGGA  
TAG--GCACGAATTC---AAAAA---A--CTTCTTAAAGGGACTACCT-GCCTCAAGCAG  
GCGG-AAGTCCGAGGCAATAACAGGTCTGTGATGCCCTTAGATACCTT-GGGCCGCACGC  
GCGCTACAATGTAGAAAACAAAAAGGT----TCC-----TGGTCTGG-AAG--GA  
TT-GGGTAATCAATTGAATTTTCTACGTAACCTGGGATTG-ATCTTTGTAATTATCGATCA  
TCAACGAGGAATTCCTTGTAAGCGTAGGTCATTACCCTATGCTGAATATGTCCTGCCCT  
TTGTACACACCGCCCGTCTCTACCGATCGAATGATACGGTAAAGTTAACGGATTG--  
-----TTTT--G-CTTT---CGTTATAGGGGCA-----TTA--TGA-CAAG--TTA  
-TT-TAAATCT--C---ATT--GTTT

>AM168067.1 Dictyostelium septentrionale\_AK2

TCTAAG-TATAAATCTTG-TACGATGAAA----CTGCAGACGGCTCATT--ACAA--CA  
---GT---GATAAACTA-TTAGACTTTCGG-GTTTTT-----ACCTTTT-GGATAACCG  
CAGTAAATCGGGGCTAATACATAGAAG-CG-ATGGG-TAACTGGC-----AAC-G-G-AA  
GCTCAGCGATTATT---A-GCA-T---CTA-TCAATAC--CTTC--GGGTCTTG-T-GGT  
GAAACCGAATAATATGCAGATCGAAG-----ATT-TATCTTCGACAAGTCTATTGT  
GTAACCTGCCCTAACAATTTCGATGGTACGGTATTGGCCTACCATGGTTGTAACGGGTAA  
CGGGGAATTAGGGTTCGATTCCGGAGAGGGAGCCTGAGAAATGGCTACCACTTCTACGGA  
AGGCAGCAGGCGCGCAAATT-ACTCAATCCCAATAC-GGGGAAGTAGTGACAATAAATAT  
CAATGCCTATCC--TT-A-TGGAGG--GCAATTGAAATGAACACAAAATAAAACCTTAA  
TT-AACACAATTGGAGGGCAAGTCTGGTGCCAGCAGCCGCGTAATTCCAGCTCCAA-TA  
GCATATACTAAAAGTTGTTGCAGTTAAAA-AGC-TCGTAGTTGAAGTCAAAGGTTTGTC-G  
GG-TCAA-----AGTTGTTTTTCCGCTCT-----GGTGGT-AAAC---A  
TACTCCGGCATCTCTTTTT-TT-----AATAG-TTCTGCTTGCTATCTT-----TG  
ATGGTACTTGTTG-----AACAGTTCACCGTGAGAAAA-TTGTGGTGT  
CAAAGCA--GG-C---GTT--TC-GCCTGATCTTTTGCAGCATGGTATGATGAAACATG  
ACAT---TTACGC--TATTGGTTT--GCG----TCTAGAGTGAATGATTAATAGGGAT  
GGATGGGGGTGTTCAATTTGGTGGGCGAGAGGTGAAATTCGTTGACCCTATCAAGATGAA  
CTTCTGCGAAAGCATTCCCAAATCTTCTCCATTAATCAAGAACGAAAGTTGGGGATC  
GAAGACGATCAGATACCGTCTAGTCCAAACTATAAACTATGTCGACCAGGGATCGGTAA  
AA--AT-TTTTTAAAAATTAATCGGCACCTT-GTGAGAAATCAC-GAGTGTTAGATT  
CGGGGGGAGTATGGTGCAGAGTCTGAACTTAAAGGAATTGACGGAAGGGCACACAATGG  
AGTGGAG-CCTGCGGCTTAATTT-GACTCAACTCGGAAA-ACTTACCAAGCTAAGATAT  
AGTAAGGATTGACAGA-CTAA-AAGATCTTTCATGATTCTATAAGTGGTGGTGCATGGTC  
GTTCTTAG-TTGGTGGAGCGATTTGTCTGGTCAATTCCGATAACGGACGAGACCTCGACC  
TGCTAACTAGTAGTGTATTTTCGCCAATATGGGCGATAGCTTTTTGGGATTCG-GTT  
CATT---TC--GGTGGAT---TCG-GGTTTCAGGGAG---TGTGTAGTCTGGTGGGA  
TAG--GCACGAATTC---AAAAA---A--CTTCTTAGAGGGACTACCT-GCCTCAAGCAG  
GCGG-AAGTCCGAGGCAATAACAGGTCTGTGATGCCCTTAGATACCTT-GGGCCGCACGC  
GCGCTACAATGTAGAAAACAAAAAGGT----TCC-----TGGTCTGG-AAG--GA  
TT-GGGTAATCAATTGAATTTTCTACGTAACCTGGGATTG-ATCTTTGTAATTATCGATCA  
TCAACGAGGAATTCCTTGTAAGCGTAGGTCATTACCCTATGCTGAATATGTCCTGCCCT  
TTGTACACACCGCCCGTCTCTACCGATCGAATGATACGGTAAAGTTAACGGATTG--  
-----TTTT--G-CTTT---CGTTATAGGGGCA-----TTA--TGA-AAAAG--TTA  
-TT-TAAATCT--C---ATT--GTTT

>AM168037.1 Dictyostelium crassaule\_93HO\_33

TCTAAG-TATAAATCTTG-TACGATGAAA----CTGCAGACGGCTCATT--ACAA--CA  
---GT---GATAAACTA-ATAGACTTTCGG-GTTTTT-----AACCTTTT-GGATAACCG

CAGTAAATCGGGGGCTAATACATAGAAG-CG-ATGGG-TGACTGGC-----AAC-G-G-AA  
TCTCAGCGATTATT---A-GCA-TAA-CTA-CCAATAC--CTTC--GGGTCTTGT-GGT  
GAAACCGAATAATATTGCAGATCGAAG-----ATT-TATCTTCGACAAGTCTACTGT  
GTCCTGCCCCTAACAATTTCGATGGTACGGTATTGGCCTACCATGGTTGTAACGGGTAA  
CGGGGAATTAGGGTTCGATTCGGAGAGGGAGCCTGAGAAATGGCTACCACTTCTACGGA  
AGGCAGCAGGCGCGCAAATT-GCTCAATCCCAATAC-GGGGAAGTAGTGACAATAAATAT  
CAATACCTATCC--TT-AATGGAGG--GCAATTGAAATGAACACAAATTAATACTTTAA  
TT-AACACAGTTGGAGGGCAAGTCTGGTGCCAGCAGCCGCGGTAATTCCAGCTCCAA-TA  
GCATATACTAAAGTTGTTGCAGTTAAAA-AGC-TCGTAGTTGAAGTTAAAGGTTTACT-G  
GG-CTCA-----AGTTATTTG-CCACTCT-----GGTGGTTAAAT---A  
TACTCCAGTATCTCTTTT-TTCT--AATAG-TTCAGCTTGATCAACCT-----AG  
TTGGTACTCGTTT-----GACATTTCACTGTGAGAAAA-TTGTGGTGT  
TAAAGCA--GG-C---GTC--TC-GCCTGATCTTTGTCAGCATGGTATGATGAAACATG  
ACAT---TTTGCGC--TATTGGTT--GCG---TCTAAAGTGTAATGATTAATAGGGAT  
GGATGGGGGTGTTTCATATTGGTGGGCGAGAGGTGAAACTCGTTGACCCTATCAAGATGAA  
CTTCTGCGAAAGCATTACCAAATACTTCCCATAATCAAGAACGAAAGTTTGGGGATC  
GAAGACGATCAGATACCGTCGTAGTCCAACTATAAATATGTCGACCAGGGATCGGTAA  
AA--AT-TTTTTAAAAATTAATCGGCACCTT-GTGAGAAATCAC-GAGTGTTAGATT  
CGGGGGGAGTATGGTTCGAACTGAACTTAAAGGAATTGACGGAAGGGCACACAATGG  
AGTGGAG-CCTGCGGCTTAATTT-GACTCAACTCGGAAAA-ACTTACCAAGCTAAGATAT  
AGTAAGGATTGACAGA-CTAA-AAGATCTTTCATGATTCTATAAGTGGTGGTGCATGGTC  
GTTCTTAG-TTGGTGGAGCGATTTGTCTGGTCAATTCCGATAACGACGAGACCTCGACC  
TGCTAAGTAGTAGTATTTATTA-GTCAATATGGGCGATAGCTTTTCTGGGGTGGAGTAAT  
AGC---TCACGGTTATT---ATT-TACTTCAAGGAG---TGTGTAGTCTGACTTGA  
TAG--GTACGAATTA---AAAA---A--CTTCTTAGAGGGACTACCT-GCCTCAAGCAG  
GCGG-AAGTCCGAGGCAATAACAGGTCTGTGATGCCCTTAGATACCTT-GGGCCGACCG  
GCGCTACAATGTAGAAAAAAGGTT---TCC-----TGGTCCGG-AAG---GA  
TT-GGGTAATCAATTTGAATTTTCTACGTAACCTGGGATTG-ATCTTTGTAATTATTGATCA  
TCAACGAGGAATTCCTTGTAAAGCGTAGGTCATTACCCTATGCTGAATATGTCCTGCCCT  
TTGTACACACCGCCGTCGCTCTACCGATCGAATGATACGGTAAACTTAAACGGATCG--  
-----TTTT--ATCTTTGG-C-AAC-ATTGATA-----TAAA-CTA-AAAG--TTA  
-TT-TAAATCT--C---ATT--GTTT

>AM168050.1 *Dictyostelium medium* TNS\_C 205

TCTAAG-TATAAATCTTG-TACGATGAAA---CTGCAGACGGCTCATT--ACAA--CA  
---GT---GATAAACTA-ATAGACTTTCGG-GTTTTT---AACCTTTT-GGATAACCG  
CAGTAAATCGGGGGCTAATACATAGAAG-CG-ATGGG-TGAC-GGC-----AAC-G---AA  
GCTCAGCGATTATT---A-GCA-TTA-CTA-CCAATAC--CTTC--GGGTCTTGT-GGT  
GAAACCGAATAATATTGCAGATCGAGG-----ATT-TATCTTCGACAAGTCTACTGT  
GTCCTGCCCCTAACAATTTCGATGGTACGGTATTGGCCTACCATGGTTGTAACGGGTAA  
CGGGGAATTAGGGTTCGATTCGGAGAGGGAGCCTGAGAAATGGCTACCACTTCTACGGA  
AGGCAGCAGGCGCGCAAATT-CTCAATCCCAATAC-GGGGAAGTAGTGACAATAAATAT  
CAATACCTATCC--TT-AATGGAGG--GCAATTGAAATGAACACAAATTAATACTTTAA  
TT-AACACAATTGGAGGGCAAGTCTGGTGCCAGCAGCCGCGGTAATTCCAGCTCCAA-TA  
GCATATACTAAAGTTGTTGCAGTTAAAA-AGC-TCGTAGTTGAAGTTAAAGGTTTACT-G  
GG-CTAA-----AGTTATTTG-CCGCTCT-----GGTGGTTAAAT---C  
AACTCCAGTATCTCTTTTCG-CTC---AATAG-TTCAGCTTGATCAACCT-----AG  
TTGGTACTCGTTT-----GACATTTCACTGTGAGAAAA-TTGTGGTGT  
TAAAGCA--GG-C---GTC--TC-GCCTGATCTTTGTCAGCATGGTATGATGGAACATG  
ACAT---TTTGCGC--TATTGGTT--GCG---TCTAAAGTGTAATGATTAATAGGGAT  
GGATGGGGGTGTTTCATATTGGTGGGCGAGAGGTGAAATTCGTTGACCCTATCAAGATGAA  
CTTCTGCGAAAGCATTACCAAATACTTCCCATAATCAAGAACGAAAGTTTGGGGATC  
GAAGACGATCAGATACCGTCGTAGTCCAACTATAAATATGTCGACCAGGGATCGGTAA  
AA--AT-TTTTTAAAAATTAATCGGCACCTT-GTGAGAAATCAC-GAGTGTTAGATT  
CGGGGGGAGTATGGTTCGAACTGAACTTAAAGGAATTGACGGAAGGGCACACAATGG  
AGTGGAG-CCTGCGGCTTAATTT-GACTCAACTCGGAAAA-ACTTACCAAGCTAAGATAT  
AGTAAGGATTGACAGA-CTAA-AAGATCTTTCATGATTCTATAAGTGGTGGTGCATGGTC  
GTTCTTAG-TTGGTGGAGCGATTTGTCTGGTCAATTCCGATAACGACGAGACCTCGACC  
TGCTAAGTAGTAGTATTTATTA-GTCGATATAGGCGATAGCTTTTCTGGGGTTGG-AAT  
GATT---TC--GGTCATC---TCC-TATTTCAAGGAG---TGTGTAGTCTGGCTTGA  
TAG--GTACGAATTA---AAAA-----CTTCTTAGAGGGACTACCT-GCCTCAAGCAG  
GCGG-AAGTCCGAGGCAATAACAGGTCTGTGATGCCCTTAGATACCTT-GGGCCGACCG  
GCGCTACAATGTAGAAAAAAGGTT---TCC-----TGGTCCGG-AAG---GA  
TT-GGGTAATCAATTTGAATTTTCTACGTAACCTGGGATTG-ATCTTTGTAATTATTGATCA  
TCAACGAGGAATTCCTTGTAAAGCGAGGTCATTACCCTGTGCTGAATATGTCCTGCCCT  
TTGTACACACCGCCGTCGCTCTACCGATCGAATGATACGGTAAAGTTAAACGGATCG--  
-----TTTT--ATCTGTGG-C-AAC-ACTGATA-----TAAA-CTA-AAAG--TTA  
-TT-TAAATCT--C---ATT--GTTT

>AM168055.1 *Dictyostelium mucoroides* var. *stoloniferum* FOII\_1

TCTAAG-TATAAATCTTG-TACGATGAAA---CTGCAGACGGCTCATT--ACAA--CA  
---GT---GATAAACTA-ATAGACTTTCGG-GTTTTT---AACCTTTT-GGATAACCG  
CAGTAAATCGGGGGCTAATACATAGAAG-CG-ATGGG-TGAC-GGC-----AAC-G---AA  
GCTCAGCGATTATT---A-GCA-TTA-CTA-CCAATAC--CTTC--GGGTCTTGT-GGT  
GAAACCGAATAATATTGCAGATCGAGG-----ATT-TATCTTCGACAAGTCTACTGT

GTCAC T GCCCTATCAACTTTCGATGGTACGGTATTGGCCTACCATGGTTGTAACGGGTAA  
CGGGAATTAGGGTTCGATTCCGGAGAGGGAGCCTGAGAAATGGCTACCCTTCTACGGA  
AGGCAGCAGGCGCGCAAATT-ACTCAATCCCAATAC-GGGGAAGTAGTGACAATAAATAT  
CAATACCTATCC--TT-AATGGAGG--GCAATTGAAATGAACACAAATTAATACTTTAA  
TT-AACACAATTGGAGGGCAAGTCTGGTGCCAGCAGCCGCGGTAATTCCAGCTCCAA-TA  
GCATATACTAAAGTTGTTGCAGTTAAAA-AGC-TCGTAGTTGAAGTTAAAGGTTTACT-G  
GG-CTAA-----AGTTATTG-CCGCTCT-----GGTGGTTAAAT----C  
AACTCCAGTATCTCTTTTCG-CTC----AATAG-TTCAGCTTGATCAACCT-----AG  
TTGGTACTCGTTT-----GACATTTCACTGTGAGAAAA-TTGTGGTGTT  
TAAAGCA--GG-C---GTC---TC-GCCTGATCTTTTGCAGCATGGTATGATGGAACATG  
ACAT---TTTGCGC--TATTGGTTT--GCG----TCTAAAGTGTAATGATTAATAGGGAT  
GGATGGGGGTGTTTCATATTGGTGGGCGAGAGGTGAAATTCGTTGACCCTATCAAGATGAA  
CTTCTGCGAAAGCATTACCAAATACTTCCCATTAAATCAAGAACGAAAGTTTGGGGATC  
GAAGACGATCAGATACCGTCTAGTCCAAACTATAAACTATGTGACCCAGGGATCGGTTA  
AA--AT-TTTTTAAAAATTTAATCGGCACCTT-GTGAGAAATCAC-GAGTGTTTAGATTC  
CGGGGGGAGTATGGTGCAGAGTCTGAACTTAAAGGAATTGACGGAAGGGCACACAATGG  
AGTGGAG-CCTGCGGCTTAATTT-GACTCAACTCGGGAAA-ACTTACCAAGCTAAGATAT  
AGTAAGGATTGACAGA-CTAA-AAGATCTTTCATGATTCTATAAGTGGTGGTGCATGGTC  
GTTCTTAG-TTGGTGGAGCGATTTGTCTGGTCAATCCGATAACGACGAGACCTCGACC  
TGCTAACTAGTAGTATTTATTA-GTCAATGAGGGGATAGCTTTTCTGGGGTGGAG-AAC  
GATT---TC--GGTCGCT---TCT-TACTTCAAGGAG---TGTGTAGTCTGACTTGA  
TAG--GTACGAATTA---AAAAA---A--CTTCTTAGAGGGACTACCT-GCCTCAAGCAG  
GCGG-AAGTCCGAGGCAATAACAGGTCTGTGATGCCCTTAGATACCTT-GGGCCGCACGC  
GCGCTACAATGTATAAAAACAAAAAGGC----TCC-----TGGTCCGG-AAG---GA  
TT-GGGTAATCAATTGAATTTTCTACGTAACCTGGGATTG-ATCTTTGTAATTATTGATCA  
TCAACGAGGAATTCCTTGTAAAGCGTAAGTCATTACCTTATGCTGAATATGTCCTGCCCCT  
TTGTACACACCCCGTCTGCTCTACCGATCGAATGATACGGTAAAGTTAACGGATCG--  
-----TTTT--ACCTTTGG-C-AAC-ATTGGTA-----TAAA-CTA-AAAG--TTA  
-TT-TAAATCT--C----ATT--GTTT

>AM168028.1 *Dictyostelium aureum*\_SL1

TCTAAG-TATAAATCTTTG-TACGATGAAA---CTGCAGACGGCTCATT--ACAA--CA  
---GT---GATAAACTG-CTAGACTTTTCGG-GTTTTT---AACCTTTT-GGATAACCG  
CAGTAAATCGGGGCTAATACATAGAAG-CG-ATGGG-CGACTGGT-----AAC-G-G-AA  
GCTCAGCGATTATT---A-GCA-TAA-CTA-CCAATAC--CTTC--GGGTCTTGT-GGT  
GAAACCGAATAATATTGCAGATCGAAG-----ATT-TATCTTCGACAAGTCTAATGT  
GTCAC T GCCCTATCAACTTTCGATGGTACGGTATTGGCCTACCATGGTTGTAACGGGTAA  
CGGGAATTAGGGTTCGATTCCGGAGAGGGAGCCTGAGAAATGGCTACCCTTCTATGGA  
AGGCAGCAGGCGCGCAAATT-ACTCAATCCCAATAC-GGGGAAGTAGTGACAATAAATAT  
CAATACCTATCC--TT-AATGGAGG--GCAATTGAAATGAACACAAATTAATACTTTAA  
TT-AACACAATTGGAGGGCAAGTCTGGTGCCAGCAGCCGCGGTAATTCCAGCTCCAA-TA  
GCATATACTAAAGTTGTTGCAGTTAAAA-AGC-TCGTAGTTGAAGTTAAAGGTTTATT-G  
GG-TCAA-----AGCCATTG-CCGCTCT-----GGTGGTTAAAT----G  
TGCTCCAGTATTTCTTTT-TTTGAAAAATTG-TTCAGCTTGATCAACCT-----AG  
TTGGTACTCGTTT-----GACATTTCACTGTGAGAAAA-TTGTGGTGTT  
TAAAGCA--GG-C---GTC---TC-GCCTGATCTTTTGCAGCATGGTATGATGAAACATG  
ACAT---TTTGCGC--TATTGGTTT--GCG----TCTAAAGTGTAATGATTAATAGGGAT  
GGATGGGGGTGTTTCATATTGGTGGGCGAGAGGTGAAATTCGTTGACCCTATCAAGATGAA  
CTTCTGCGAAAGCATTATCAAAATACTTCCCATTAAATCAAGAACGAAAGTTTGGGGATC  
GAAGACGATCAGATACCGTCTAGTCCAAACTATAAACTATGTGACCCAGGGATCGGTTA  
AA--AT-TTTTTAAAAATTTAATCGGCACCTT-GTGAGAAATCAC-GAGTGTTTAGATTC  
CGGGGGGAGTATGGTGCAGAGTCTGAACTTAAAGGAATTGACGGAAGGGCACACAATGG  
AGTGGAG-CCTGCGGCTTAATTT-GACTCAACTCGGGAAA-ACTTACCAAGCTAAGATAT  
AGTTAGGATTGACAGA-CTAA-AAGATCTTTCATGATTCTATAAGTGGTGGTGCATGGTC  
GTTCTTAG-TTGGTGGAGCGATTTGTCTGGTCAATCCGATAACGACGAGACCTCGACC  
TGCTAACTAGTAGTATTTATTA-GTCAACATGGGCGATAGCTTTTCTGGGATTTAG-AAC  
GATT---TC--GGTCGTT---TCT-GGTTTCAAGGAG---TGTGTAGTCTGACTTGA  
TAG--GTACGAATTA---AAAAA---A--CTTCTTAGAGGGACTACCT-GCCTCAAGCAG  
GCGG-AAGTCCGAGGCAATAACAGGTCTGTGATGCCCTTAGATACCTT-GGGCCGCACGC  
GCGCTACAATGTATAAAAACAAAAAGGT----TCC-----TGGTCCGG-AAG---GA  
TT-GGGTAATCAATTGAATTTTCTACGTAACCTGGGATTG-ATCTTTGTAATTATTGATCA  
TAAACGAGGAATTCCTTGTAAAGCGTAGGTCATTACCTATGCTGAATATGTCCTGCCCCT  
TTGTACACACCCCGTCTGCTCTACCGATCGAATGATACGGTAAAGTTAACGGATAG--  
-----TTTT--ATCTTTGG-C-AAC-ATTGATA-----TAAA-TTA-AAAG--TTA  
-TT-TAAATCT--C----ATT--GTTT

>AM167876.1 *Dictyostelium aureocephalum*\_TNS\_C\_180

TCTAAG-TATAAATCTTTG-TACGATGAAA---CTGCAGACGGCTCATT--ACAA--CA  
---GT---GATAAACTG-CTAGACTTTTCGG-GTTTTT---AACCTTTT-GGATAACCG  
CAGTAAATCGGGGCTAATACATAGAAG-CG-ATGGG-CGACTGGT-----AAC-G-G-AA  
GCTCAGCGATTATT---A-GCA-TAA-CTA-CCAATAC--CTTC--GGGTCTTGT-GGT  
GAAACCGAATAATATTGCAGATCGAAG-----ATT-TATCTTCGACAAGTCTAATGT  
GTCAC T GCCCTATCAACTTTCGATGGTACGGTATTGGCCTACCATGGTTGTAACGGGTAA  
CGGGAATTAGGGTTCGATTCCGGAGAGGGAGCCTGAGAAATGGCTACCCTTCTACGGA  
AGGCAGCAGGCGCGCAAATT-ACTCAATCCCAATAC-GGGGAAGTAGTGACAATAAATAT

CAATACCTATCC--TT-AATGGAGG--GCAATTGAAATGAACACAAAATAAAACCTTTAA  
TT-AACACAATTGGAGGGCAAGTCTGGTGCCAGCAGCCGCGTAATCCAGCTCCAA-TA  
GCATATACTAAAGTTGTTGTCAGTTAAAA-AGC-TCGTAGTTGAAGTTAAAGGTTTATT-G  
GG-TCAA-----AGCTATTTG-CCGCTCT-----GGTGGTTAAAT----A  
CGCTCCAGTATTTCTTTTT-TTTGAAAAATTG-TTCAGCTTGTGTCAACCT-----AG  
TTGGCGCTCGTTG-----GACATTTCACTGTGAGAAAA-TTGTGGTGTT  
TAAAGCA--GG-C---GTC---TC-GCCTGATCTTTTGCAGCATGGTATGATGAAACATG  
ACAT---TTTGCGC--TATTGGT--GCG---TCTAAAGTGAATGATTAATAGGGAT  
GGATGGGGGTGTTTCATATTGGTGGGCGAGAGGTGAAATTCGTTGACCCTATCAAGATGAA  
CTTCTGCGAAAGCATTACCAAACTTCTCCATTAATCAAGAACGAAAGTTTGGGGATC  
GAAAGCATCAGATACCGTCTGATGCCAAACTATAAACTATGTCCGACCAGGGATCGGTTA  
AA--AT-TTTTTTAAAAATTAATCGGCACCTT-GTGAGAAATCAC-GAGTGTTTAGATTC  
CGGGGGGAGTATGGTTCGCAAGTCTGAACTTAAAGGAATTGACGGAAGGGCACACAATGG  
AGTGGAG-CCTGCGGCTTAATTT-GACTCAACTCGGGAAA-ACTTACCAAGCTAAGATAT  
AGTTAGGATTGACAGA-CTAA-AAGATCTTTCATGATTCTATAAGTGGTGGTGCATGGTC  
GTTCTTAG-TTGGTGGAGCGATTTGTCTGGTCAATTCCGATAACGACGAGACCTCGACC  
TGCTAACTAGTAGTATTTATTA-GTCAATATGGGCGATAGCTTTTCTGGGATGGAG-AGC  
CCTT---TC--GGGGGTT---TCT-TATTTCAAGGAG---TGTGTAGTCTGACTGA  
TAG--GTACGAATTA---AAAA---A--CTTCTAGAGGGACTACCT-GCCTCAAGCAG  
GCGG-AAGTCCGAGGCAATAACAGGTCTGTGATGCCCTTAGATACCTT-GGGCCGCACGC  
GCGCTACAATGTATAAAACAAAAAGGT----TCC-----TGGTCCGG-AAG--GA  
TT-GGGTAATCAATTGAATTTTCTACGTAACCTGGGATTG-ATCTTTGTAATTATTGATCA  
TAAACGAGGAATTCCTGTAAGCGTAGGTCATTACCCTATGCTGAATATGTCCTGCCCT  
TTGTACACACCGCCGCTCGCTCTACCGATCGAATGATACGGTAAAGTTAACGGATAG--  
-----TTTT--ATCTTTGG-C-AAC-ATTGATA-----TAAA-TTA-AAAG--TTA  
-TT-TAAATCT--C---ATT--GTTT

>HQ141480.1 Dictyostelium leptosomum NZN49A

TCTAAG-TATAAATCTTG-TACGATGAAA---CTGCAGACGGCTCATT--ACAA--CA  
---GT---GATAAACTG-CTAGACTTTTCGG-GTTTTT---AACCTTTT-GGATAACCG  
CAGTAAATCGGGGCTAATACATAGAAG-CG-ATGGG-TGACTGGT-----AAC-G-G-AA  
GCTCAGCGATTATT---A-GCA-TAA-CTA-CCAATAC--CTTC--GGGTCTTGT-GGT  
GAAACCGAATAATATTGCAGATCGAGG-----ATT-TATCTTCGACAAGTCTAATGT  
GTCACTGCCCTATCAACTTTCGATGGTACGGTATTGGCCTACCATGGTTGTAACGGGTAA  
CGGGGAATTAGGGTTCGATTCCGGAGAGGGAGCCTGAGAAATGGCTACCCTTCTACGGA  
AGGCAGCAGGCGCGCAAATT-ACTCAATCCCAATAC-GGGGAAGTAGTGACAATAAATAT  
CAATACCTATCC--TT-AATGGAGG--GCAATTGAAATGAACACAAAATAAAACCTTTAA  
TT-AACACAATTGGAGGGCAAGTCTGGTGCAGCAGCCGCGTAATCCAGCTCCAA-TA  
GCATATACTAAAGTTGTTGTCAGTTAAAA-AGC-TCGTAGTTGAAGTTAAAGGTTTATT-G  
GG-TCAA-----AGCTATTTG-CCGCTCT-----GGTGGTTAAAT----A  
TGCTCCAGTATTTCTTTTT-TTTGAAAAATTG-TTCAGCTTGTATCAACTT-----TG  
TTGGTACTCGTTG-----GACATTTCACTGTGAGAAAA-TTGTGGTGTT  
TAAAGCA--GG-C---GTC---TC-GCCTGATCTTTTGCAGCATGGTATGATGAAACATG  
ACAT---TTTGCGC--TATTGGT--GCG---TCTAAAGTGAATGATTAATAGGGAT  
GGATGGGGGTGTTTCATATTGGTGGGCGAGAGGTGAAATTCGTTGACCCTATCAAGATGAA  
CTTCTGCGAAAGCATTACCAAACTTCTCCATTAATCAAGAACGAAAGTTTGGGGATC  
GAAAGCATCAGATACCGTCTGATGCCAAACTATAAACTATGTCCGACCAGGGATCGGTTA  
AA--AT-TTTTTTAAAAATTAATCGGCACCTT-GTGAGAAATCAC-GAGTGTTTAGATTC  
CGGGGGGAGTATGGTTCGCAAGTCTGAACTTAAAGGAATTGACGGAAGGGCACACAATGG  
AGTGGAG-CCTGCGGCTTAATTT-GACTCAACTCGGGAAA-ACTTACCAAGCTAAGATAT  
AGTTAGGATTGACAGA-CTAA-AAGATCTTTCATGATTCTATAAGTGGTGGTGCATGGTC  
GTTCTTAG-TTGGTGGAGCGATTTGTCTGGTCAATTCCGATAACGACGAGACCTCGACC  
TGCTAACTAGTAGTATTTATTA-GTCAATATGGGCGATAGCTTTTCTGGGATTTAG-AGC  
GATT---TC--GGTCGTT---TCT-GGTTTCAAGGAG---TGTGTAGTCTGGCTTGA  
TAG--GTACGAATTA---AAAA---A--CTTCTAGAGGGACTACCT-GCCTCAAGCAG  
GCGG-AAGTCCGAGGCAATAACAGGTCTGTGATGCCCTTAGATACCTT-GGGCCGCACGC  
GCGCTACAATGTATAAAACAAAAAGGT----TCC-----TGGTCCGG-AAG--GA  
TT-GGGTAATCAATTGAATTTTCTACGTAACCTGGGATTG-ATCTTTGTAATTATTGATCA  
TAAACGAGGAATTCCTGTAAGCGTAGGTCATTACCCTATGCTGAATATGTCCTGCCCT  
TTGTACACACCGCCGCTCGCTCTACCGATCGAATGATACGGTAAAGTTAACGGATAG--  
-----TTTT--ATCTTTGG-C-AAC-ATTGATA-----TAAA-TTA-AAAG--TTA  
-TT-TAAATCT--C---AT--GTT-

>AM168032.1 Dictyostelium capitatum 9IHO\_50

TCTAAG-TATAAATCTTG-TACGATGAAA---CTGCAGACGGCTCATT--ACAA--CA  
---GT---GATAAACTG-CTAGACTTTTCGG-GTTTTT---AACCTTTT-GGATAACCG  
CAGTAAATCGGGGCTAATACATAGAAG-CG-ATGGG-CGACTGGT-----AAC-G-G-AA  
GCTCAGCGATTATT---A-GCA-TAA-CTA-CCAATAC--CTTC--GGGTCTTGT-GGT  
GAAACCGAATAATATTGCAGATCGAAG-----ATT-TATCTTCGACAAGTCTAATGT  
GTCACTGCCCTATCAACTTTCGATGGTACGGTATTGGCCTACCATGGTTGTAACGGGTAA  
CGGGGAATTAGGGTTCGATTCCGGAGAGGGAGCCTGAGAAATGGCTACCCTTCTACGGA  
AGGCAGCAGGCGCGCAAATT-ACTCAATCCCAATAC-GGGGAAGTAGTGACAATAAATAT  
CAATACCTATCC--TT-AATGGAGG--GCAATTGAAATGAACACAAAATAAAACCTTTAA  
TT-AACACAATTGGAGGGCAAGTCTGGTGCAGCAGCCGCGTAATCCAGCTCCAA-TA  
GCATATACTAAAGTTGTTGTCAGTTAAAA-AGC-TCGTAGTTGAAGTTAAAGGTTTATT-G



GG-TCAA-----AGCTATTTG-CCGCTCT-----GGTGGTTAAAT----A  
TGCTCCAGTATTCTTTTT-TTTGAAAAATTG-TTCAGCTTGTATCAACTT-----TG  
TTGGTACTCGTTTG-----GACATTTCACTGTGAGAAAA-TTGTGGTGTT  
TAAAGCA--GG-C---GTC---TC-GCCTGATCTTTTGCAGCATGGTATGATGAAACATG  
ACAT--TTTGCGC--TATTGGTTT--GCG----TCTAAAAGTGAATGATTAATAGGGAT  
GGATGGGGGTGTTCAATATGGTGGGCGAGAGGTGAAATTCGTTGACCCTATCAAGATGAA  
CTTCTGCGAAAGCATTACCAAATACTTCTCCATTAATCAAGAACGAAAAGTTGGGGATC  
GAAGACGATCAGATACCGTCGTAGTCCAAACTATAAACTATGTGACACCAGGGATCGGTAA  
AA--AT-TTTTTAAAAATTTAATCGGCACCTT-GTGAGAAATCAC-GAGTGTTTAGATT  
CGGGGGGAGTATGGTTCGCAAGTCTGAACTTAAAGGAATTGACGGAAGGGCACACAATGG  
AGTGGAG-CCTGCGCTTAATTT-GACTCAACTCGGGAAA-ACTTACCAAGCTAAGATAT  
AGTTAGGATTGACAGA-CTAA-AAGATCTTTCATGATTCTATAAGTGGTGGTGCATGGTC  
GTTCTTAG-TTGGTGGAGCGATTTGTCTGGTCAATTCCGATAACGACGAGACCTCGACC  
TGCTAACTAGTAGTATTTATTA-GTCAATATGGGCGATAGCTTTTCTGGGATTTAG-AGC  
GATT---TC--GGTCGTT---TCT-GGTTTCAAGGAG----TGTGTAGTCTGACTTGA  
TAG--GTCCGAATTA---AAAAA---A--CTTCTAGAGGGACTACCT-GCCTCAAGCAG  
GCGG-AAGTCCGAGGCAATAACAGGTCTGTGATGCCCTTAGATACCTT-GGGCCGCACGC  
GCGCTACAATGTATAAAACAAAAAGGT----TCC-----TGGTCCGG-AAG--GA  
TT-GGGTAATCAATGAAATTTTCTACGTAACCTGGGATTG-ATCTTTGTAATTATTGATCA  
TAAACGAGGAATTCCTGTAAAGCGTAGGTCAATTACCTGTGCTGAATATGTCCCTGCCCT  
TTGTACACACCGCCCGTCTCTACCGATCGAATGATACGCTAAAGTTAACGGATAG--  
-----TTTT--ATCTTTGG-C-AAC-ATTGATA-----TAAA-TTA-AAAG--TTA  
-TT-TAAATCT--C---ATT--GTTT

>AM168059.1 Dictyostelium\_pseudobrefeldianum\_91HO\_8

TCTAAG-TATAAATCTTG-TACGATGAAA----CTGCAGACGGCTCATT--ACAA--CA  
---GT---GATAAACTG-CTAGACTTTCGG-GTTTTT----AACCTTTT-GGATAACCG  
CAGTAAATCGGGGTAATACATAGAAG-CG-ATGGG-CGACTGGT-----AAC-G-G-AA  
GCTCAGCGATTATT----A-GCA-TAA-CTA-CCAATAC--CTTC--GGGTCTTGT-GGT  
GAAACCGAATAATATGCAGATCGAAG-----ATT-TATCTTCGACAAGTCTAATGT  
GTCAGTCCCTATCAACTTTCGATGGTACGGTATTGGCCTACCATGGTTGTAACGGGTAA  
CGGGGAATTAGGGTTCGATTCGGGAGAGGGAGCCTGAGAAATGGCTACCCTTCTACGGA  
AGGACGAGGCGCGCAAATT-ACTCAATCCCAATAC-GGGGAAGTAGTGACAATAAATAT  
CAATACCTATCC--TT-AATGGAGG--GCAATTGAAATGAACACAAATTAATACTTTAA  
TT-AACACAATTGGAGGGCAAGTCTGGTGCCAGCAGCCGCGGTAATTCCAGCTCCAA-TA  
GCATATACTAAAGTTGTTGCAGTTAAAA-AGC-TCGTAGTTGAAGTTAAAGGTTTATT-G  
GG-TCAA-----AGCTATTTG-CCGCTCT-----GGTGGTTAAAT----A  
TGCTCCAGTATTCTTTTT-TTTGAAAAATTG-TTCAGCTTGTATCAACTT-----TG  
TTGGTACTCGTTTG-----GACATTTCACTGTGAGAAAA-TTGTGGTGTT  
TAAAGCA--GG-C---GTC---TC-GCCTGATCTTTTGCAGCATGGTATGATGAAACATG  
ACAT--TTTGCGC--TATTGGTTT--GCG----TCTAAAAGTGAATGATTAATAGGGAT  
GGATGGGGGTGTTCAATATGGTGGGCGAGAGGTGAAATTCGTTGACCCTATCAAGATGAA  
CTTCTGCGAAAGCATTACCAAATACTTCTCCATTAATCAAGAACGAAAAGTTGGGGATC  
GAAGACGATCAGATACCGTCGTAGTCCAAACTATAAACTATGTGACACCAGGGATCGGTAA  
AA--AT-TTTTTAAAAATTTAATCGGCACCTT-GTGAGAAATCAC-GAGTGTTTAGATT  
CGGGGGGAGTATGGTTCGCAAGTCTGAACTTAAAGGAATTGACGGAAGGGCACACAATGG  
AGTGGAG-CCTGCGCTTAATTT-GACTCAACTCGGGAAA-ACTTACCAAGCTAAGATAT  
AGTTAGGATTGACAGA-CTAA-AAGATCTTTCATGATTCTATAAGTGGTGGTGCATGGTC  
GTTCTTAG-TTGGTGGAGCGATTTGTCTGGTCAATTCCGATAACGACGAGACCTCGACC  
TGCTAACTAGTAGTATTTATTA-GTCAATATGGGCGATAGCTTTTCTGGGATTTAG-AGC  
GACT---TC--GGTTGTT---TCT-GGTTTCAAGGAG----TGTGTAGTCTGACTTGA  
TAG--GTACGAATTA---AAAAA---A--CTTCTAGAGGGACTACCT-GCCTCAAGCAG  
GCGG-AAGTCCGAGGCAATAACAGGTCTGTGATGCCCTTAGATACCTT-GGGCCGCACGC  
GCGCTACAATGTATAAAACAAAAAGGT----TCC-----TGGTCCGG-AAG--GA  
TT-GGGTAATCAATGAAATTTTCTACGTAACCTGGGATTG-ATCTTTGTAATTATTGATCA  
TAAACGAGGAATTCCTGTAAAGCGTAGGTCAATTACCTATGCTGAATATGTCCCTGCCCT  
TTGTACACACCGCCCGTCTCTACCGATCGAATGATACGGTAAAGTTAACGGATAG--  
-----TTTT--ATCTTTGG-C-AAC-ATTGATA-----TAAA-TTA-AAAG--TTA  
-TT-TAAATCT--C---ATT--GTTT

>GQ496158.1 Dictyostelium\_austroandinum

TCTAAG-TATAAATCTTG-TACGATGAAA----CTGCAGACGGCTCATT--ACAA--CA  
---GT---GATAAACTG-CTAGACTTTCGG-GTTTTT----AACCTTTT-GGATAACCG  
CAGTAAATCGGGGTAATACATAGAAG-CG-ATGGG-CGACTGGT-----AAC-G-G-AA  
GCTCAGCGATTATT----A-GCA-TAA-CTA-CCAATAC--CTTC--GGGTCTTGT-GGT  
GAAACCGAATAATATGCAGATCGAAG-----ATT-TATCTTCGACAAGTCTAATGT  
GTCAGTCCCTATCAACTTTCGATGGTACGGTATTGGCCTACCATGGTTGTAACGGGTAA  
CGGGGAATTAGGGTTCGATTCGGGAGAGGGAGCCTGAGAAATGGCTACCCTTCTACGGA  
AGGACGAGGCGCGCAAATT-ACTCAATCCCAATAC-GGGGAAGTAGTGACAATAAATAT  
CAATACCTATCC--TT-AATGGAGG--GCAATTGAAATGAACACAAATTAATACTTTAA  
TT-AACACAATTGGAGGGCAAGTCTGGTGCCAGCAGCCGCGGTAATTCCAGCTCCAA-TA  
GCATATACTAAAGTTGTTGCAGTTAAAA-AGC-TCGTAGTTGAAGTTAAAGGTTTATT-G  
GG-TCAA-----AGCTATTTG-CCGCTCT-----GGTGGTTAAAT----A  
TGCTCCAGTATTCTTTTT-TTTGAAAAATTG-TTCAGCTTGTATCAACTT-----TG  
TTGGTACTCGTTTG-----GACATTTCACTGTGAGAAAA-TTGTGGTGTT

TAAAGCA--GG-C---GTC---TC-GCCTGATCTTTTGCAGCATGGTATGATGAAACATG  
ACAT---TTTGCGC--TATTGGTTT--GCG----TCTAAAGTGTAATGATTAATAGGGAT  
GGATGGGGGTGTTTCATATTGGTGGGCGAGAGGTGAAATTCGTTGACCCTATCAAGATGAA  
CTTCTGCGAAAGCATTACCAAATACTTCTCCATTAATCAAGAACGAAAGTTTGGGGATC  
GAAAGCAGATCAGATACCGTCGTAGTCCAAACTATAAACTATGTGACACCAGGGATCGGTAA  
AA--AT-TTTTTTAAAAATTAATCGGCACCTT-GTGAGAAATCAC-GAGTGTTTAGATT  
CGGGGGGAGTATGGTCGCAAGTCTGAACTTAAAGGAATTGACGGAAGGGCACACAATGG  
AGTGGAG-CCTGCGGCTTAATTT-GACTCAACTCGGGAAA-ACTTACCAAGCTAAGATAT  
AGTTAGGATTGACAGA-CTAA-AAGATCTTTCATGATTCTATAAGTGGTGGTGCATGGTC  
GTTCTTAG-TTGGTGGTGGCATTGTCTGGTCAATTCCGATAACGGACGAGACCTCGACC  
TGCTAACTAGTAGTATTTATTA-GTCAATATGGGCGATAGCTTTTCTGGGATTTAG-AGC  
GATT---TC--GGTCGTT---TCT-GGTTTCAAGGAG---TGTGTAGTCTGACTTGA  
TAG--GTACGAATTA---AAAAA---A--CTTCTTAGAGGGACTACCT-GCCTCAAGCAG  
GCGG-AAGTCCGAGGCAATAACAGTCTGTGATGCCCTTAGATACCTT-GGGCCGCACGC  
GCGCTACAATGTATAAAACAAAAAGGT----TCC-----TGGTCCGG-AAG---GA  
TT-GGGTAATCAATTGAATTTTCTACGTAACCTGGGATTG-ATCTTTGTAATTATTGATCA  
TAAACGAGGAATTCCTTGTAAGCGTAGGTCATTACCCTATGCTGAATATGTCCCTGCCCT  
TTGTACACACCGCCCGTCTCTACCGATCGAATGATACGGTAAAGTTAACGGATAG--  
-----TTTT--ATCTTTGG-C-AAC-ATTGATA-----TAAA-TTA-AAAG--TTA  
-TT-TAAATCT--C----ATT--GTT-

>HM15992.1 Dictyostelium leptosomopsis Araucaria\_1

TCTAAG-TATAAATCTTG-TACGATGAAA---CTGCAGACGGCTCATT--ACAA--CA  
---GT---GATAAACTG-CTAGACTTTCGG-GTTTTT---AACCTTTTCGGATAACCG  
CAGTAAATCGGGGCTAATACATAGAAG-CG-ATGGG-CGACTGGT-----AAC-G-G-AA  
GCTCAGCGATTATT---A-GCA-TAA-CTA-CCAATAC--CTTC--GGGTCTTGT-GGT  
GAAACCGAATAATATTGCAGATCGAAG-----ATT-TATCTTCGACAAGTCTAATGT  
GTCACTGCCCTATCAACTTTCGATGGTACGGTATTGGCCTACCATGGTTGTAACGGGTAA  
CGGGGAATTAGGGTTCGATTCGGAGAGGGAGCCTGAGAAAATGGCTACCACTTCTACGGA  
AGGCAGCAGGCGCGCAAATT-ACTCAATCCCAATAC-GGGGAAGTAGTGACAATAAATAT  
CAATACCTATCC--TT-AATGGAGG--GCAATTGAAATGAACACAAATTAATACTTTAA  
TT-AACACAATTGGAGGGCAAGTCTGGTGCAGCAGCGCGGTAATTCAGCTCCAA-TA  
GCATATACTAAAGTTGTTGCAGTTAAAA-AGC-TCGTAGTTGAAGTTAAAGGTTTATT-G  
GG-TCAA-----AGCTATTG-CCGCTCT-----GGTGGTTAAAT----A  
TGCTCCAGTATTTCTTTTT-TTTGAAAAATTG-TTCAGCTTGATCAACTT-----TG  
TTGGTACTCGTTT-----GACATTTCACTGTGAGAAAA-TTGTGGTGT  
TAAAGCA--GG-C---GTC---TC-GCCTGATCTTTTGCAGCATGGTATGATGAAACATG  
ACAT---TTTGCGC--TATTGGTTT--GCG----TCTAAAGTGTAATGATTAATAGGGAT  
GGATGGGGGTGTTTCATATTGGTGGGCGAGAGGTGAAATTCGTTGACCCTATCAAGATGAA  
CTTCTGCGAAAGCATTACCAAATACTTCTCCATTAATCAAGAACGAAAGTTTGGGGATC  
GAAAGCAGATCAGATACCGTCGTAGTCCAAACTATAAACTATGTGACACCAGGGATCGGTAA  
AA--AT-TTTTTTAAAAATTAATCGGCACCTT-GTGAGAAATCAC-GAGTGTTTAGATT  
CGGGGGGAGTATGGTCGCAAGTCTGAACTTAAAGGAATTGACGGAAGGGCACACAATGG  
AGTGGAG-CCTGCGGCTTAATTT-GACTCAACTCGGGAAA-ACTTACCAAGCTAAGATAT  
AGTTAGGATTGACAGA-CTAA-AAGATCTTTCATGATTCTATAAGTGGTGGTGCATGGTC  
GTTCTTAG-TTGGTGGAGCGATTGTCTGGTCAATTCCGATAACGGACGAGACCTCGACC  
TGCTAACTAGTAGTATTTATTA-GTCAATATGGGCGATAGCTTTTCTGGGATTTAG-AGC  
GATT---TC--GGTCGTT---TCT-GGTTTCAAGGAG---TGTGTAGTCTGACTTGA  
TAG--GTACGAATTA---AAAAA---A--CTTCTTAGAGGGACTACCT-GCCTCAAGCAG  
GCGG-AAGTCCGAGGCAATAACAGTCTGTGATGCCCTTAGATACCTT-GGGCCGCACGC  
GCGCTACAATGTATAAAACAAAAAGGT----TCC-----TGGTCCGG-AAG---GA  
TT-GGGTAATCAATTGAATTTTCTACGTAACCTGGGATTG-ATCTTTGTAATTATTGATCA  
TAAACGAGGAATTCCTTGTAAGCGTAGGTCATTACCCTATGCTGAATATGTCCCTGCCCT  
TTGTACACACCGCCCGTCTCTACCGATCGAATGATACGGTAAAGTTAACGGATAG--  
-----TTTT--ATCTTTGG-C-AAC-ATTGATA-----TAAA-TTA-AAAG--TTA  
-TT-TAAATCT--C----ATT--GTT-

>AM168054.1 Dictyostelium mucoroides S28b

TCTAAG-TATAAATCTTG-TACGATGAAA---CTGCAGACGGCTCATT--ACAA--CA  
---GT---GATAAACTG-CTAGACTTTCGG-GTTTTT---AACCTTTT-GGATAACCG  
CAGTAAATCGGGGCTAATACATAGAAG-CG-ATGGG-CGACTGGT-----AAC-G-G-AA  
GCTCAGCGATTATT---A-GCA-TAA-CTA-CCAATAC--CTTC--GGGTCTTGT-GGT  
GAAACCGAATAATATTGCAGATCGAAG-----ATT-TATCTTCGACAAGTCTAATGT  
GTCACTGCCCTATCAACTTTCGATGGTACGGTATTGGCCTACCATGGTTGTAACGGGTAA  
CGGGGAATTAGGGTTCGATTCGGAGAGGGAGCCTGAGAAAATGGCTACCACTTCTACGGA  
AGGCAGCAGGCGCGCAAATT-ACTCAATCCCAATAC-GGGGAAGTAGTGACAATAAATAT  
CAATACCTATCC--TT-AATGGAGG--GCAATTGAAATGAACACAAATTAATACTTTAA  
TT-AACACAATTGGAGGGCAAGTCTGGTGCAGCAGCGCGGTAATTCAGCTCCAA-TA  
GCATATACTAAAGTTGTTGCAGTTAAAA-AGC-TCGTAGTTGAAGTTAAAGGTTTATT-G  
GG-TCAA-----AGCTATTG-CCGCTCT-----GGTGGTTAAAT----A  
TGCTCCAGTATTTCTTTTT-TTTGAAAAATTG-TTCAGCTTGATCAACTT-----TG  
TTGGTACTCGTTT-----GACATTTCACTGTGAGAAAA-TTGTGGTGT  
TAAAGCA--GG-C---GTC---TC-GCCTGATCTTTTGCAGCATGGTATGATGAAACATG  
ACAT---TTTGCGC--TATTGGTTT--GCG----TCTAAAGTGTAATGATTAATAGGGAT  
GGATGGGGGTGTTTCATATTGGTGGGCGAGAGGTGAAATTCGTTGACCCTATCAAGATGAA

CTTCTGCGAAAGCATTACCAAATACTTCTCCATTAATCAAGAACGAAAGTTTGGGGATC  
GAAGACGATCAGATACCGTCGTAGTCCAAACTATAAACTATGTCGACCAGGGATCGGTAA  
AA--AT-TTTTTTAAAAATTTAATCGGCACCTT-GTGAGAAATCAC-GAGTGTTTAGATT  
CGGGGGGAGTATGGTCGCAAGTCTGAACTTAAAGGAATTGACGGAAGGGCACACAATGG  
AGTGGAG-CCTGCGGCTTAATTT-GACTCAACTCGGGAAA-ACTTACCAAGCTAAGATAT  
AGTTAGGATTGACAGA-CTAA-AAGATCTTTCATGATTCTATAAGTGGTGGTGCATGGTC  
GTTCTTAG-TTGGTGGAGCGATTTGCTGGTCAATTCCGATAACGGACGAGACCTCGACC  
TGCTAACTAGTAGTATTTATTA-GTCAATATGGGCGATAGCTTTTCTGGGATTTAG-AGC  
GATT---TC--GGTCGTT---TCT-GGTTTCAAGGAG---TGTGTAGTCTGACTTGA  
TAG--GTACGAATTA---AAAA---A--CTTCTTAGAGGGACTACCT-GCCTCAAGCAG  
GCGG-AAGTCCGAGGCAATAACAGGTCTGTGATGCCCTTAGATACCTT-GGGCCGCACGC  
GCGCTACAATGTATAAAAACAAAAAGGT-----TCC-----TGGTCCGG-AAG---GA  
TT-GGGTAATCAATTGAATTTTCTACGTAACCTGGGATTG-ATCTTTGTAATTATTGATCA  
TAAACGAGGAATTCCTTGTAAAGCGTAGGTCATTACCTATGCTGAATATGTCCTGCCCCT  
TTGTACACACCGCCCTCGCTCTACCGATCGAATGATACGGTAAAGTTAACGGATAG--  
-----TTTT--ATCTTTGG-C-AAC-ATTGATA-----TAAA-TTA-AAAG--TTA  
-TT-TAAATCT--C---ATT--GTTT

>AM168030.1 *Dictyostelium\_brefeldianum*\_TNS\_C\_115

TCTAAG-TATAAATCTTTG-TACGATGAAA---CTGCAGACGGCTCATT--ACAA--CA  
---GT---GATAAACTG-CTAGACTTTCGG-GTTTTT---AACCTTTT-GGATAACCG  
CAGTAAATCGGGGCTAATACATAGAAG-CG-ATGGG-CGACTGGT-----AAC-G-G-AA  
GCTCAGCGATTATT---A-GCA-TAA-CTA-CCAATAC--CTTC--GGGTCTTGT-GGT  
GAAACCGAATAATATGCAGATCGAAG-----ATT-TATCTTCGACAAGTCTAATGT  
GTCAGTCCCCTATCAACTTTCGATGGTACGGTATTGGCCTACCATGGTGTAAACGGGTAA  
CGGGGAATTAGGGTTCGATTCCGGAGAGGGAGCCTGAGAAATGGCTACCACTTCTACGGA  
AGGCAGCAGGCGCGCAAATT-ACTCAATCCCAATAC-GGGGAAGTAGTGACAATAAATAT  
CAATACCTATCC--TT-AATGGAGG--GCAATTGAAATGAACACAAAATAAAACCTTAA  
TT-AACACAATTGGAGGGCAAGTCTGGTGGCCAGCAGCCGCGTAATTCCAGCTCCAA-TA  
GCATATACTAAAGTTGTTGCAGTTAAAA-AGC-TCGTAGTTGAAGTTAAAGGTTTATT-G  
GG-TCAA-----AGCTATTG-CCGCTCT-----GGTGGTAAAT---A  
TGCTCCAGTATTTCTTTTT-TTTGAAAAATTG-TTCAGCTTGTATCAACTT-----TG  
TTGGTACTCGTTTG-----GACATTTCACTGTGAGAAAA-TTGTGGTGTT  
TAAAGCA--GG-C--GTC--TC-GCCTGATCTTTTGCAGCATGGTATGATGAAACATG  
ACAT---TTGCGC--TATTGGTTT--GCG----TCTAAAGTGTAAATGATTAATAGGGAT  
GGATGGGGGTGTTCAATTTGGTGGGCGAGAGGTGAAATTCGTTGACCCTATCAAGATGAA  
CTTCTGCGAAAGCATTACCAAATACTTCTCCATTAATCAAGAACGAAAGTTTGGGGATC  
GAAGACGATCAGATACCGTCGTAGTCCAAACTATAAACTATGTCGACCAGGGATCGGTAA  
AA--AT-TTTTTTAAAAATTTAATCGGCACCTT-GTGAGAAATCAC-GAGTGTTTAGATT  
CGGGGGGAGTATGGTCGCAAGTCTGAACTTAAAGGAATTGACGGAAGGGCACACAATGG  
AGTGGAG-CCTGCGGCTTAATTT-GACTCAACTCGGGAAA-ACTTACCAAGCTAAGATAT  
AGTTAGGATTGACAGA-CTAA-AAGATCTTTCATGATTCTATAAGTGGTGGTGCATGGTC  
GTTCTTAG-TTGGTGGAGCGATTTGCTGGTCAATTCCGATAACGGACGAGACCTCGACC  
TGCTAACTAGTAGTATTTATTA-GTCAATATGGGCGATAGCTTTTCTGGGATTTAG-AGC  
GATT---TC--GGTCGTT---TCT-GGTTTCAAGGAG---TGTGTAGTCTGACTTGA  
TAG--GTACGAATTA---AAAA---A--CTTCTTAGAGGGACTACCT-GCCTCAAGCAG  
GCGG-AAGTCCGAGGCAATAACAGGTCTGTGATGCCCTTAGATACCTT-GGGCCGCACGC  
GCGCTACAATGTATAAAAACAAAAAGGT-----TCC-----TGGTCCGG-AAG---GA  
TT-GGGTAATCAATTGAATTTTCTACGTAACCTGGGATTG-ATCTTTGTAATTATTGATCA  
TAAACGAGGAATTCCTTGTAAAGCGTAGGTCATTACCTATGCTGAATATGTCCTGCCCCT  
TTGTACACACCGCCCTCGCTCTACCGATCGAATGATACGGTAAAGTTAACGGATAG--  
-----TTTT--ATCTTTGG-C-AAC-ATCGATA-----TAAA-TTA-AAAG--TTA  
-TT-TAAATCT--C---ATT--GTTT

>HQ141482.1 *Dictyostelium\_mucoroides\_sweden*\_20

TCTAAG-TATAAATCTTTG-TACGATGAAA---CTGCAGACGGCTCATT--ACAA--CA  
---GT---GATAAACTG-CTAGACTTTCGG-GTTTTT---AACCTTTT-GGATAACCG  
CAGTAAATCGGGGCTAATACATAGAAG-CG-ATGGG-CGACTGGT-----AAC-G-G-AA  
GCTCAGCGATTATT---A-GCA-TAA-CTA-CCAATAC--CTTC--GGGTCTTGT-GGT  
GAAACCGAATAATATGCAGATCGAAG-----ATT-TATCTTCGACAAGTCTAATGT  
GTCAGTCCCCTATCAACTTTCGATGGTACGGTATTGGCCTACCATGGTGTAAACGGGTAA  
CGGGGAATTAGGGTTCGATTCCGGAGAGGGAGCCTGAGAAATGGCTACCACTTCTACGGA  
AGGCAGCAGGCGCGCAAATT-ACTCAATCCCAATAC-GGGGAAGTAGTGACAATAAATAT  
CAATACCTATCC--TT-AATGGAGG--GCAATTGAAATGAACACAAAATAAAACCTTAA  
TT-AACACAATTGGAGGGCAAGTCTGGTGGCCAGCAGCCGCGTAATTCCAGCTCCAA-TA  
GCATATACTAAAGTTGTTGCAGTTAAAA-AGC-TCGTAGTTGAAGTTAAAGGTTTATT-G  
GG-TCAA-----AGCTATTG-CCGCTCT-----GGTGGTAAAT---A  
TGCTCCAGTATTTCTTTTT-TTTGAAAAATTG-TTCAGCTTGTATCAACTT-----TG  
TTGGTACTCGTTTG-----GACATTTCACTGTGAGAAAA-TTGTGGTGTT  
TAAAGCA--GG-C--GTC--TC-GCCTGATCTTTTGCAGCATGGTATGATGAAACATG  
ACAT---TTGCGC--TATTGGTTT--GCG----TCTAAAGTGTAAATGATTAATAGGGAT  
GGATGGGGGTGTTCAATTTGGTGGGCGAGAGGTGAAATTCGTTGACCCTATCAAGATGAA  
CTTCTGCGAAAGCATTACCAAATACTTCTCCATTAATCAAGAACGAAAGTTTGGGGATC  
GAAGACGATCAGATACCGTCGTAGTCCAAACTATAAACTATGTCGACCAGGGATCGGTAA  
AA--AT-TTTTTTAAAAATTTAATCGGCACCTT-GTGAGAAATCAC-GAGTGTTTAGATT

CGGGGGGAGTATGGTCGCAAGTCTGAACTTAAAGGAATTGACGGAAGGGCACACAATGG  
AGTGGAG-CCTGCGCTTAATTT-GACTCAACTCGGGAAA-ACTTACCAAGCTAAGATAT  
AGTTAGGATTGACAGA-CTAA-AAGATCTTTCATGATTCTATAAGTGGTGGTGCATGGTC  
GTTCTTAG-TTGGTGGAGCGATTTGTCTGGTCAATTCCGATAACGGACGAGACCTCGACC  
TGCTAACTAGTAGTATTTATTA-GTCAATATGGGCGATAGCTTTTCTGGGATTTAG-AGC  
GATT---TC--GGTCGTT---TCT-GGTTTCAAGGAG---TGTGTAGTCTGACTTGA  
TAG--GTACGAATTA---AAAAA---A--CTTCTTAGAGGGACTACCT-GCCTCAAGCAG  
GCGG-AAGTCCGAGGCAATAACAGGTCTGTGATGCCCTTAGATACCTT-GGGCCGCACGC  
GCGCTACAATGTATAAAACAAAAAGGT----TCC-----TGGTCCGG-AAG---GA  
TT-GGGTAATCAATTGAATTTTCTACGTAACGGGATTG-ATCTTTGTAATTATTGATCA  
TAAACGAGGAATTCCTGTAAAGCGTAGGTCATTACCCTATGCTGAATATGTCCCTGCCCT  
TTGTACACACCGCCCGTCTCTACCGATCGAATGATACGGTAAAGTTAACGGATAG--  
-----TTTT--ATCTTTGG-C-AAC-ATTGATA-----TAAA-TTA-AAAG--TTA  
-TT-TAAATCT--C----ATT--GTTT

>AM168043.1 Dictyostelium implicatum\_93HO\_1

TCTAAG-TATAAATCTTG-TACGATGAAA---CTGCAGACGGCTCATT--ACAA--CA  
---GT---GATAAACTA-ATAGACTTTCGG-GTTTTT---AACCTTTT-GGATAACCG  
CAGTAAATCGGGGTAATACATAGAAG-CG-ATGGG-TGACTGGC-----AAC-G-G-AA  
TCTCAGCGATTATT---A-GCA-TTA-CTA-CCAATAC--CTTC--GGGTCTGT-GGT  
GAAACCGAATAATATTGCAGATCGAGG-----ATT-TATCTTCGACAAGTCTACTGT  
GTCACTGCCCTATCAACTTTCGATGGTACGGTATTGGCCTACCATGGTTGTAACGGGTAA  
CGGGGAATTAGGGTTCGATTCCGGAGAGGGGAGCCTGAGAAATGGCTACCACTTCTACGGA  
AGGCAGCAGGCGCGCAAATT-ACTCAATCCCAATAC-GGGGAAGTAGTGACAATAAATAT  
TAATACCTATCC--TT-AATGGAGG--GCAATTGAAATGAACACAAATTAATACTCTTAA  
TT-AACACAATTGGAGGGCAAGTCTGGTGCCAGCAGCCGCGGTAATTCCAGCTCCAA-TA  
GCATATACTAAAGTTGTTGCAGTAAAA-AGC-TCGTAGTTGAAGTCAAAGGTTTATT-G  
GG-TCAA-----AGTTATTTG-CCGCTCT-----GGTGGTTAAAT---A  
TACTCCAGTATCTCTTTTT-TT-----AATAG-TTCAGCTTGTATTAACTT-----TG  
TTAGTACTTGTGTTG-----GACATTTCACTGTGAGAAAA-TTGTGGTGT  
TAAAGCA--GG-C---GTT--TC-GCCTGATCTTTTGCAGCATGGTATGATGAAACATG  
ACAT---TTTACGC--TATTGGTTT--GCG---TCTAAAGTGTAATGATTAATAGGGAT  
GGATGGGGGTGTTTCATATTGGTGGGCGAGAGGTGAAATTCGTTGACCTATCAAGATGAA  
CTTCTGCGAAAGCATTACCAAATACTTCCCATAATCAAGAACGAAAGTTTGGGGATC  
GAAGACGATCAGATACCGTCGTAGTCCAACTATAAACTATGTCGACCAGGGATCGGTAA  
AA--AT-TTTTTAAAAATTTAATCGGCACCTT-GTGAGAAATCAC-GAGTGTATATTC  
CGGGGGGAGTATGGTCGCAAGTCTGAACTTAAAGGAATTGACGGAAGGGCACACAATGG  
AGTGGAG-CCTGCGCTTAATTT-GACTCAACTCGGGAAA-ACTTACCAAGCTAAGATAT  
AGTAAGGATTGACAGA-CTAA-AAGATCTTTCATGATTCTATAAGTGGTGGTGCATGGTC  
GTTCTTAG-TTGGTGGAGCGATTTGTCTGGTCAATTCCGATAACGGACGAGACCTCGACC  
TGCTAACTAGTAGTATTTATTA-GTCAATATGGGCGATAGCTTTTCTGGGATTTAG-AGC  
GATT---TC--GGTCGTT---TCT-TGTTTCAAGGAG---TGTGTAGTCTGGCTTGA  
TAG--GTACGAATTA---AAAAA---A--CTTCTTAGAGGGACTACCT-GCCTCAAGCAG  
GCGG-AAGTCCGAGGCAATAACAGGTCTGTGATGCCCTTAGATACCTT-GGGCCGCACGC  
GCGCTACAATGTAGAAAAACAAAAAGGT----TCC-----TGGTCCGG-AAG---GA  
TT-GGGTAATCAATTGAATTTTCTACGTAACGGGATTG-ATCTTTGTAATTATTGATCA  
TCAACGAGGAATTCCTTGTAAAGCGTAGGTCATTACCCTATGCTGAATATGTCCCTGCCCT  
TTGTACACACCGCCCGTCTCTACCGATCGAATGATACGGTAAAGTTAACGGATCG--  
-----TTTT--ATCTTTGG-C-AAC-ATTGATA-----TAAA-TTA-AAAG--TTA  
-TT-TAAATCT--C----ATT--GTTT

>GQ496159.1 Dictyostelium chordatum

TCTAAG-TATAAATCTTG-TACGATGAAA---CTGCAGACGGCTCATT--ACAA--CA  
---GT---GATAAACTA-ATAGACTTTCGG-GTTTTT---AACCTTTT-GGATAACCG  
CAGTAAATCGGGGTAATACATAGAAG-CG-ATGGG-TGACTGGC-----AAC-G-G-AA  
TCTCAGCGATTATT---A-GCA-TTA-CTA-CCAATAC--CTTC--GGGTCTGT-GGT  
GAAACCGAATAATATTGCAGATCGAGG-----ATT-TATCTTCGACAAGTCTACTGT  
GTCACTGCCCTATCAACTTTCGATGGTACGGTATTGGCCTACCATGGTTGTAACGGGTAA  
CGGGGAATTAGGGTTCGATTCCGGAGAGGGGAGCCTGAGAAATGGCTACCACTTCTACGGA  
AGGCAGCAGGCGCGCAAATT-ACTCAATCCCAATAC-GGGGAAGTAGTGACAATAAATAT  
TAATACCTATCC--TT-AATGGAGG--GCAATTGAAATGAACACAAATTAATACTCTTAA  
TT-AACACAATTGGAGGGCAAGTCTGGTGCCAGCAGCCGCGGTAATTCCAGCTCCAA-TA  
GCATATACTAAAGTTGTTGCAGTAAAA-AGC-TCGTAGTTGAAGTCAAAGGTTTGTG-T  
GG-TCAA-----AGTTATTTG-CCGCTCT-----GGTGGTTAAAT---A  
TACTCCAGCATCTCTTTTT-TT-----AATAG-TTCAGCTTGTATTGACTT-----TG  
TTAGTACTTGTGTTG-----GACATTTCACTGTGAGAAAA-TTGTGGTGT  
TAAAGCA--GG-C---GTC--TC-GCCTGATCTTTTGCAGCATGGTATGATGAAACATG  
ACAT---TTTACGC--TATTGGTTT--GCG---TCTAAAGTGTAATGATTAATAGGGAT  
GGATGGGGGTGTTTCATATTGGTGGGCGAGAGGTGAAATTCGTTGACCTATCAAGATGAA  
CTTCTGCGAAAGCATTACCAAATACTTCCCATAATCAAGAACGAAAGTTTGGGGATC  
GAAGACGATCAGATACCGTCGTAGTCCAACTATAAACTATGTCGACCAGGGATCGGTAA  
AA--AT-TTTTTAAAAATTTAATCGGCACCTT-GTGAGAAATCAC-GAGTGTATGATTC  
CGGGGGGAGTATGGTCGCAAGTCTGAACTTAAAGGAATTGACGGAAGGGCACACAATGG  
AGTGGAG-CCTGCGCTTAATTT-GACTCAACTCGGGAAA-ACTTACCAAGCTAAGATAT  
AGTAAGGATTGACAGA-CTAA-AAGATCTTTCATGATTCTATAAGTGGTGGTGCATGGTC

GTTCTTAG-TTGGTGGAGCGATTGTCTGGTCAATTCCGATAACGGACGAGACCTCGACC  
TGCTAACTAGTAGTATTTATTA-GTCAATATGGGCGATAGCTTTTCTGGGATGTAG-AGC  
GATT---TC--GGTCGTT---TCT-TATTTCAAGGAG---TGTGTAGTCTGGCTTGA  
TAG--GTACGAATTA---AAAAA---A--CTTCTTAGAGGGACTACCT-GCCTCAAGCAG  
GCGG-AAGTCCGAGGCAATAACAGGTCTGTGATGCCCTTAGATACCTT-GGGCCGCACGC  
GCGCTACAATGTAGAAAACAAAAGGT-----TCC-----TGGTCCGG-AAG---GA  
TT-GGGTAATCAATTGAATTTTCTACGTAACCTGGGATTG-ATCTTTGTAATTATTGATCA  
TCAACGAGGAATTCCTTGTAAAGCGTAGGTCATTACCCTATGCTGAATATGTCCTGCCCT  
TTGTACACACCGCCCGTCTCTACCGATCGAATGATACGGTAAAGTTAACGGATCG--  
-----TTTT--ATCTTTGG-C-AAC-ATTGATA-----TAAA-TTA-AAAG--TTA  
-TT-TAAATCT--C----AT--GTT-

>JX173878.1 *Dictyostelium barbibulus* Sweden\_4R

TCTAAG-TATAAATCTTTG-TACGATGAAA---CTGCAGACGGCTCATT--ACAA--CA  
---GT---GATAAACTA-ATAGACTTTTCGG-GTTTT---AACCTTTT-GGATAACCG  
CAGTAAATCGGGGTAATACATAGAAG-CG-ATGGG-TGACTGGC-----AAC-G-G-AA  
TCTCAGCGATTATT---A-GCA-TTA-CTA-CCAATAC--CTTC--GGGTCTTGT-GGT  
GAAACCGAATAATATTGCAGATCGAGG-----ATT-TATCTTCGACAAGTCTACTGT  
GTCACTGCCCTATCAACTTTCGATGGTACGGTATTGGCCTACCATGGTTGTAACGGGTAA  
CGGGGAATTAGGGTTCGATTCGGAGAGGGAGCCTGAGAAATGGCTACCCTCTACGGA  
AGGCAGCAGGCGCGCAAATT-ACTCAATCCCAATAC-GGGGAAGTAGTGACAATAAATAT  
TAATACCTATCC--TT-AATGGAGG--GCAATTGAAATGAACACAAATTAATAACTCTTAA  
TT-AACACAATTGGAGGGCAAGTCTGGTGCCAGCAGCCGCGGTAATTCCAGCTCCAA-TA  
GCATATACTAAAGTTGTTGCAGTAAAA-AGC-TCGTAGTTGAAGTCAAAGGTTTGTG-T  
GG-TCAA-----AGTTATTTG-CCGCTCT-----GGTGGTTAAAT----A  
TACTCCAGCATCTCTTTTT-TT-----AATAG-TTCAGCTTGTATTAACCT-----TG  
TTGGTACTTGTTTG-----GACATTTCACTGTGAGAAAA-TTGTGGTGT  
TAAAGCA--GG-C---GTC---TC-GCCTGATCTTTTGCAGCATGGTATGATGAAACATG  
ACAT---TTACGC--TATTGGTTT--GCG----TCTAAAGTGAATGATTAATAGGGAT  
GGATGGGGGTGTTTCATATTGGTGGGCGAGAGGTGAAATTCGTTGACCCTATCAAGATGAA  
CTTCTGCGAAAGCATTACCAAATACTTCCCATAATCAAGAACGAAAGTTTGGGGATC  
GAAGACGATCAGATACCGTCTAGTCCAAACTATAAACTATGTGACCCAGGGATCGGTAA  
AA--AT-TTTTTTAAATTTAATCGGCACCTT-GTGAGAAATCAC-GAGTGTTTAGATTC  
CGGGGGGAGTATGGTCGCAAGTCTGAAACTTAAAGGAATTGACGGAAGGGCACACAATGG  
AGTGGAG-CCTGCGGCTTAATTT-GACTCAACTCGGGAAA-ACTTACCAAGCTAAGATAT  
AGTAAGGATTGACAGA-CTAA-AAGATCTTTCATGATTCTATAAGTGGTGGTGCATGGTC  
GTTCTTAG-TTGGTGGAGGATTTGCTGGTCAATCCGATAACGGACGAGACCTCGACC  
TGCTAACTAGTAGTATTTATTA-GTCAATATGGGCGATAGCTTTTCTGGGATGTAG-AGC  
GACT---TC--GGTTGTT---TCT-TATTTCAAGGAG---TGTGTAGTCTGGCTTGA  
TAG--GTACGAATTA---AAAAA---A--CTTCTTAGAGGGACTACCT-GCCTCAAGCAG  
GCGG-AAGTCCGAGGCAATAACAGGTCTGTGATGCCCTTAGATACCTT-GGGCCGCACGC  
GCGCTACAATGTAGAAAACAAAAGGT-----TCC-----TGGTCCGG-AAG---GA  
TT-GGGTAATCAATTGAATTTTCTACGTAACCTGGGATTG-ATCTTTGTAATTATTGATCA  
TCAACGAGGAATTCCTTGTAAAGCGTAGGTCATTACCCTATGCTGAATATGTCCTGCCCT  
TTGTACACACCGCCCGTCTCTACCGATCGAATGATACGGTAAAGTTAACGGATCG--  
-----TTTT--ATCTTTGG-C-AAC-ATTGATA-----TAAA-TTA-AAAG--TTA  
-TT-TAAATCT--C----ATT--GTT-

>AM168057.1 *Synsteliium polycarpum* VE1b

TCTAAG-TATAAATCTTTG-TACGGTAAAA---CTGCAGACGGCTCATT--ATAA--CA  
---GT---GATAAACTA-CAGAACTTTCGC-GTTAA-----TTCGTAT-GGATAACCG  
CAGTAAATCGGGGTAATACATACAAA-CG-AAAGG-CGAGCGGG---CAACCGTG-AG  
TCCTTGCATTATT---AACCA-TT--CTAACCAAT-CT-CTTC--GGAGTTTGT-GGC  
GAAACCGAATAATATTGCTGATCGA-----AAC-TAGTTTCGACAAGTTCATGT  
GTCACTGCCCTATCAACTTTCGATGGTACGGTATTGGCCTACCATGGTTGTAACGGGTAA  
CGGGGAATTAGGGTTCGATTCGGAGAGGGCGCCTGAGAAATGGCGACCCTTCTACGGA  
AGGCAGCAGGCGCGCAAATT-ACTCAATCCCGACAC-GGGGAAGTAGTGACAATAAATAT  
TAATGCCTATCAGTTT-TACTGAGG--GCAATTGAAATAAGTACAATCTAAATCGCTTAA  
CC-AATTTAATTGGAGGGCAAGTCTGGTGCCAGCAGCCGCGGTAATTCCAGCTCCAA-TA  
GCGTATACTAAATTTGTTGAGTTAAAA-AGC-TCGTAGTTAAAGTTGAAATCTTC--G  
GA-TAAA-----ACT--T----GAGTA-----GCATC-ATTAT----  
---TGGTGTTC-ACTCTG-CCG---TTTGT-TTCTTTTAT-TCAACTCCT-CGTCTA  
ACGTTGGATGTTT-----AATTCTCCACTGTGAGAAAA-ATGTAGTGT  
TAAAGCA--GG-C---GAT---TA-GTCTGATCTTTTGCAGCATGGTATGGTAAAATAAG  
ATAC---TAAACT-TATTGGTT--GTG---T-TGTAGTATAATGATTAATAGGGAA  
GGGCGGGGCCGTTATATTGATGGGCGAGAGGTGAAATTCGTTGACCCTATCAAGATGCA  
CTACAGCGGAAGCATTCCGCAAGTACTTCTCCATTAATCAAGAACGAAAGTTTGGGGATC  
GAAGACGATCAGATCCGTCAGTCCAAACCATAAACTATGTGACCCAGGGATTGGATG  
GGTAAT-TTTTAAATAAACCTATTCAGAACCTT-GTGGGAAACCAT-GAGTGTGGACTC  
TGGGGGGAGTATGGTCGCAAGTCTGAAACTTAAAGGAATTGACGGAAGGGCACACAATGG  
AGTGGAA-CCTGCGGCTTAATTT-GACTCAACTCGGGAAA-ACTTACCAAGCTAAGATAT  
AGCAAGGATTGACAGA-CTAA-AAGATTTTTCATGATTCTATAAGTGGTGGTGCATGGTC  
GTTCTTAG-TTGGTGGAGTATTGTTGTTGTTCAATCCGATAACGGACGAGACCTCGACC  
TACTAAATAGTGGTGTGATTTGGTCAATATGGGTGATAGAGTTATGGCAATTTT-GAT  
TGAT---TTC--GGTTGGT-----GTAACGTTGACGTGG--CTTGTGTAATCTGATCATT

TAG--ACACTAA--AAAATTA---ATACTTCTTAGAGGGACTACCT-ACCTCAAGTGG  
GGGG-AAGTTCGAGGCAATAACAGGTCTGTGATGCCCTTAGATACCTT-GGGCTGCACGC  
GCGTTACAATGTAAAGTGGAAAAAGGT-----TCC-----TGGACCGA-AAG--GT  
TT-GGGTAATCATTGTAATACTCTACGTAATGGGGATTG-TTCTTTGTAATTATCGAACA  
TCAACGAGGAATTCCTTGTAAAGCGTAAATCATTACTTTACGCTGAATATGTCCTGCCCCT  
TTGTACACACCGCCCGTCTCTACCGATCGAACGATACGGTAAAATCGACGGATCG--  
-----TTCTTAAT-TCCGA-A-AGG-AAA-CCT-----AGAA-TGA-AAAAG--TTG  
-TT-TAAATCT--C----ATT--GTTT  
>AM168058.1\_Synstelium\_polycarpum\_OhioWILDS  
TCTAAG-TATAAATCTTTG-TACGGTGAAA----CTGCAGACGGCTCATT--ACAA--CA  
---GT---GATAAACTA-CAGAACTTTCGC-GATTT-----ATCGTTAT-GGGTAACCG  
CAGTAAATCGGGGCTAATACATACAAA-CG-GAAGG-CGAGCGGG----CAGCTGCG-AG  
TCCTTGCGATTATT----AACCA-TT--CTAACCAAT-CT-CTT--GGAGTTTGT-GGC  
GAAACCGAATAATATTGTGATCGA-----ATT-TTAATTCGACAAGTTCTATGT  
GTCACTGCCCTATCAACTTTCGATGGTACGGTATTGGCCTACCATGGTTGTAACGGGTAA  
CGGGGAATTAGGGTTCGATTCCGGAGAGGGCGCCTGAGAAATGGCGACCACTTCTACGGA  
AGGCAGCAGGCGCGCAAATT-ACTCAATCCCAACAC-GGGGAAGTAGTGACAATAAATAT  
TAATGCCTATCAGTTT-TACTGAGG--GCAATTGAAATAAGTACAATTTAAATCGCTTAA  
CC-AATTTAATTGGAGGCAAGTCTGGTGCCAGCAGCCGGTAATTCCAGCTCCAA-TA  
GCGTATACTAAAATTTGGTTCAGTTAAAA-AGC-TCGTAGTTAAAATTGAAATTATAT--G  
GA-TAAA-----ACT--T----GATTA-----GCATC-ATTCG----  
---TGGTGTTTTATCTTG-CCA----TAAAT-TTCTTATGAT-TCAACTCCT-CGCCTA  
GCGTTGGATGTTT-----AATTCTCCACTGTGAGAAAA-ATGTAGTGTT  
TAAAGCA--GG-C---GAT---TA-GTCTGATCTTTTGCAGCATGGTATGGTAAAAATAAG  
ATAC---TAAACACT-CGTTGGTT---GTG----T-TCTGGTATAATGATTAATAGGGAA  
GGCGGGGGCCGTTCAATTGATGGGCGAGAGGTGAAATTCGTTGACCCTATCAAGATGCA  
CTACAGCGAAAGCATTCCGGAAGTACTTCTCCATTAATCAAGAACGAAAGTTTGGGGATC  
GAAGACGATCAGATACCGTCTGATGCCAAACCATAAACTATGTCGACCAGGGATTGGGTG  
GGTAAT-TTTTAATAAACTATTCAGAACCTT-GTGGGAAACCAT-GAGTGTGGGACTC  
TGGGGGGAGTATGGTTCGCAAGTCTGAACTTAAAGGAATTGACGGAAGGGCACACAGTGG  
AGTGGAA-CCTGCGGCTTAATTT-GACTCAACTCGGGAAA-ACTTACCAAGCTAAGATAT  
AGCAAGGATTGACAGA-CTAA-AAGATTTTTCATGATCTATAAGTGGTGGTGCATGGTC  
GTTCTTAG-TTGGTGGAGTGATTTGTCTGGTCAATTCCGATAACGGACGAGACCTCGACC  
TACTAAATAGTGGTGCATTTGGTCAATATGGGTGATAGTATTATGGCAGTGCTG-CAG  
CGTT---TTC--GGATGTT-----GTAGTATTGACATAG--TATGTGTAATTCGATCATT  
TAG--GCACTAA--AAAATTA---ATACTTCTTAGAGGGACTACCT-ACCTCAAGTGG  
GGGG-AAGTTCGAGGCAATAACAGGTCTGTGATGCCCTTAGATACCTT-GGGCTGCACGC  
GCGTTACAATGTAAGGTGGAAAAAGGT-----TCC-----TGGACCGA-AAG--GT  
TT-GGGTAATCATTGTAATACCCTACGTAATGGGGATTG-TTCTTTGTAATTATCGAACA  
TCAACGAGGAATTCCTGTAAGCGTAAATCATTACTTTACGCTGAATATGTCCTGCCCCT  
TTGTACACACCGCCGCTCTCCTACCGATCGAACGATACGGTAAAATTCGACAGATG--  
-----TTTTAAT-TCCGA-A-AGG-AAAGTCT-----AAGA-CAA-AAAAG--TTA  
-TT-TAAATCT--C----ATT--GTTT  
>MF125951\_Dictyostelium\_discoideum\_5751\_1\_23\_HMJAU\_MR302  
TCTAAG-TATAAATCTTTG-TACGATGAAA----CTGCAGACGGCTCATT--ACAA--CA  
---GT---GATAAACTA-ATAGACTTTTCGG-GTTTT-----ACCTTTT-GGATAACCG  
CAGTAAATCGGGGCTAATACATACAAAG-CG-ATGGG-TGACTGGC----AAC-G-G-AA  
GCTCAGCGATTATT---A-GCA-TT--CTA-CCAATGC--CTTC--GGGTTTTG--GGT  
GATACCGAATAAATATTGCAGTTCGAGG-----ATT-TATCTTCGACAAGTCTACTGT  
GTCACTGCCCTATCAACTTTCGATGGTACGGTATTGGCCTACCATGGTTGTAACGGGTAA  
CGGGGAATTAGGGTTCGATTCCGGAGAGGGAGCCTGAGAAATGGCTACCCTTCTACGGA  
AGGCAGCAGGCGCGCAAATT-ACTCAATCCCAATAC-GGGGAAGTAGTGACAATAAATAT  
CAATACCTATCC--TT-TTTGGAGG--GCAATTGAAATGAACACAAAATTTAAACTCTTAA  
TT-AACACAATTTGGAGGGCAAGTCTGGTGCCAGCAGCCGGTAATTCCAGCTCCAA-TA  
GCATATACTAAAAGTTGTCAGTAAAA-AGC-TCGTAGTTGAAGTTAAGGTTTACC-G  
GG-TTA-----TGTCATTTA-CCACTTC-----G-TGGTTAAAT---C  
GACACCGGTATCTTTCT-T-----AATAG-TTCAGCTTGATTTATCTT-----TG  
ATAGTGCTTGTGTTG-----GACATTTCACTGTGAGAAAA-TTGTGGTGT  
TAAAGCA--GG-C---GTC---TC-GCCTGATCTTTTGCAGCATGGTATGATGAAACATG  
ACAT---TTTACGC--TATTGGTTT--GCG----TTAAAGTGTAATGATTAATAGGGAT  
GGATGGGGGTGTTCAATTGGTGGGCGAGAGGTGAAATTCGTTGACCCTATCAAGATGAA  
CTTCTGCGAAAAGCAATCACCATACTTCCCATAATCAAGAACGAAAGTTTGGGGATC  
GAAGACGATCAGATACCGTCTGATGCCAAACTATAAACTATGTCGACCAGGGATCGGTTA  
AA--AT-TTTTCAAAATTTAATCGGCACCTT-GTGAGAAATCAT-GAGTGTGTTAGATTC  
CGGGGGGAGTATGGTTCGCAAGTCTGAACTTAAAGGAATTGACGGAAGGGCACACAATGG  
AGTGGAG-CCTGCGGCTTAATTT-GACTCAACTCGGGAAA-ACTTACCAAGCTAAGATAT  
AGTAAGGATTGACAGA-CTAA-AAGATCTTTCATGATTTCTATAAGTGGTGGTGCATGGTC  
GTTCTTAG-TTGGTGGAGCGATTTGTCTGGTCAATTCCGATAACGGACGAGACCTCGACC  
TGCTAACTAGTAGTATTTATTA-GTCGATATAGACGATAGCTTTTCTGGGGTTTGG-AAT  
GATT---TC--GGTCATC---TCC-TGCTTCAAGGAG---TGTGTAGTCTGACTCGA  
TAG--GTACGAATTA---AAA-----CTTCTAGAGGGACTACCT-GCCTCAAGCAG  
GCGG-AAGTCCGAGGCAATAACAGGTCTGTGATGCCCTTAGATACCTT-GGGCCGACGC  
GCCTACAATGTAGGAAACAAAAAGGC-----TCC-----TGGTCCGG-AAG--GA

TT-GGGTAATCATTGAAATTCCTACGTAACCTGGGCTTG-ATCTTTGTAATTATTGATCA  
TAAACGAGGAATTCCTTGTAAGCGTAAGTCATTACCTTATGCTGAATATGTCCCTGCCCT  
TTGTACACACCGCCCGTCGCTCTACCGATCGAATGATACGGTAAAGTTAACGGATCG--  
-----TTTT--ATCTGTGG-C-AAC-ACTGATA-----TAAA-TTA-AAAG--TTA  
-TT-TAAATCT--C----ATT--GTTT  
>MT125952\_Dictyostelium discoideum\_5752\_3\_17\_HMJAU\_MR302  
TCTAAG-TATAAATCTTG-TACGATGAAA----CTGCAGACGGCTCATT--ACAA--CA  
---GT----GATAAACTA-ATAGACTTTCGG-GTTTT-----ACCTTTT-GGATAACCG  
CAGTAAATCGGGGCTAATACATACAG-CG-ATGGG-TGACTGGC-----AAC-G-G-AA  
GCTCAGCGATTATT---A-GCA-TT--CTA-CCAATGC--CTTC--GGGTTTTG--GGT  
GATACCGAATAATATTGCAGATCGAGG-----ATT-TATCTTCGACAAGTCTACTGT  
GTCACTGCCCTATCAACTTTCGATGGTACGGTATTGGCCTACCATGGTTGTAACGGGTAA  
CGGGGAATTAGGGTTCGATTCCGGAGAGGGAGCCTGAGAAATGGCTACCACTTCTACGGA  
AGGCAGCAGGCGCGCAAAT-ACTCAATCCCAATAC-GGGGAAGTAGTGACAATAAATAT  
CAATACCTATCC--TT-TTTGGAGG--GCAATTGAAATGAACACAAATTAATACTTTAA  
TT-AACACAATTGGAGGGCAAGTCTGGTGCCAGCAGCCGCGGTAATTCCAGCTCCAA-TA  
GCATATACTAAAGTTGTTGCAGTAAAA-AGC-TCGTAGTTGAAGTTAAGGTTTACC-G  
GG-TTA-----TGTCATTTA-CCACTC-----G-TGGTTAAAT----C  
GACACCGGTATCTTTCT-T-----AATAG-TTCAGCTTGATTATCTT-----TG  
ATAGTGTGTTTTG-----GACATTTCACTGTGAGAAAA-TTGTGGTGTT  
TAAAGCA--GG-C---GTC---TC-GCCTGATCTTTTGCAGCATGGTATGATGAAACATG  
ACAT---TTTACGC--TATTGGTTT--GCG----TTAAAGTGTAATGATTAATAGGGAT  
GGATGGGGGTGTTCAATATTGGTGGGCGAGAGGTGAAATTCGTTGACCCTATCAAGATGAA  
CTTCTGCGAAAGCATTACCAAAATACTTCCCAATTAATCAAGAACGAAAGTTTGGGGATC  
GAAGACGATCAGATACCGTCGTAGTCCAACTATAAACTATGTGACACAGGGATCGGTAA  
AA--AT-TTTTTAAAAATTAATCGGCACCTT-GTGAGAAATCAT-GAGTGTTTAGATTCT  
CGGGGGGAGTATGGTTCGAACTGAACTTAAAGGAATTGACGGAAGGGCACACAATGG  
AGTGGAG-CCTGCGGCTTAATTT-GACTCAACTCGGGAAA-ACTTACCAAGCTAAGATAT  
AGTAAGGATTGACAGA-CTAA-AAGATCTTTCATGATTCTATAAGTGGTGGTGCATGGTC  
GTTCTTAG-TTGGTGGAGCGATTTGTCTGGTCAATCCGATAACGACGAGACCTCGACC  
TGCTAACTAGTAGTATTTATTA-GTCGATATAGACGATAGCTTTTCTGGGGTTTTGG-AAT  
GATT---TC--GGTCATC---TCC-TGCTTCAAGGAG----TGTGTAGTCTGACTCGA  
TAG--GTACGAATTA---AAA-----CTTCTTAGAGGGACTACCT-GCCTCAAGCAG  
GCGG-AAGTCCGAGGCAATAACAGGTCTGTGATGCCCTTAGATACCTT-GGGCCGCACGC  
GCGCTACAATGTAGGAAACAAAAAGGC-----TCC-----TGGTCCGG-AAG--GA  
TT-GGGTAATCATTGAAATTCCTACGTAACCTGGGCTTG-ATCTTTGTAATTATTGATCA  
TAAACGAGGAATTCCTTGTAAGCGTAAGTCATTACCTTATGCTGAATATGTCCCTGCCCT  
TTGTACACACCGCCCGTCGCTCTACCGATCGAATGATACGGTAAAGTTAACGGATCG--  
-----TTTT--ATCTGTGG-C-AAC-ACTGATA-----TAAA-TTA-AAAG--TTA  
-TT-TAAATCT--C----ATT--GTTT

>MW660746\_Dictyostelium mucoroides\_5035\_23\_HMJAU\_MR303  
TCTAAG-TATAAATCTTG-TACGATGAAA----CTGCAGACGGCTCATT--ACAA--CA  
---GT----GATAAACTG-CTAGACTTTCGG-GTTTT-----AACCTTTT-GGATAACCG  
CAGTAAATCGGGGCTAATACATAGAAG-CG-ATGGG-CGACTGGT-----AAC-G-G-AA  
GCTCAGCGATTATT---A-GCA-TAA-CTA-CCAATAC--CTTC--GGGTCTTGT-GGT  
GAAACCGAATAATATTGCAGATCGAAG-----ATT-TATCTTCGACAAGTCTAATGT  
GTCACTGCCCTATCAACTTTCGATGGTACGGTATTGGCCTACCATGGTTGTAACGGGTAA  
CGGGGAATTAGGGTTCGATTCCGGAGAGGGAGCCTGAGAAATGGCTACCACTTCTACGGA  
AGGCAGCAGGCGCGCAAAT-ACTCAATCCCAATAC-GGGGAAGTAGTGACAATAAATAT  
CAATACCTATCC--TT-AATGGAGG--GCAATTGAAATGAACACAAATTAATACTTTAA  
TT-AACACAATTGGAGGGCAAGTCTGGTGCCAGCAGCCGCGGTAATTCCAGCTCCAA-TA  
GCATATACTAAAGTTGTTGCAGTAAAA-AGC-TCGTAGTTGAAGTTAAGGTTTATT-G  
GG-TCAA-----AGCTATTTG-CCGCTCT-----GGTGGTTAAAT----A  
TGCTCAGTATTTCTTTT-TTTGAAAAATTG-TTCAGCTTGATCAACTT-----TG  
TTGGTACTCGTTT-----GACATTTCACTGTGAGAAAA-TTGTGGTGTT  
TAAAGCA--GG-C---GTC---TC-GCCTGATCTTTTGCAGCATGGTATGATGAAACATG  
ACAT---TTTGCGC--TATTGGTTT--GCG----TCTAAAGTGTAATGATTAATAGGGAT  
GGATGGGGGTGTTCAATATTGGTGGGCGAGAGGTGAAATTCGTTGACCCTATCAAGATGAA  
CTTCTGCGAAAGCATTACCAAAATACTTCTCCATTAATCAAGAACGAAAGTTTGGGGATC  
GAAGACGATCAGATACCGTCGTAGTCCAACTATAAACTATGTGACACAGGGATCGGTAA  
AA--AT-TTTTTAAAAATTAATCGGCACCTT-GTGAGAAATCAC-GAGTGTTTAGATTCT  
CGGGGGGAGTATGGTTCGAACTGAACTTAAAGGAATTGACGGAAGGGCACACAATGG  
AGTGGAG-CCTGCGGCTTAATTT-GACTCAACTCGGGAAA-ACTTACCAAGCTAAGATAT  
AGTTAGGATTGACAGA-CTAA-AAGATCTTTCATGATTCTATAAGTGGTGGTGCATGGTC  
GTTCTTAG-TTGGTGGAGCGATTTGTCTGGTCAATCCGATAACGACGAGACCTCGACC  
TGCTAACTAGTAGTATTTATTA-GTCAATATGGGCGATAGCTTTTCTGGGATTTAG-AGC  
GATT---TC--GGTCGTT---TCT-GGTTCAAGGAG----TGTGTAGTCTGACTTGA  
TAG--GTACGAATTA---AAAAA-----CTTCTTAGAGGGACTACCT-GCCTCAAGCAG  
GCGG-AAGTCCGAGGCAATAACAGGTCTGTGATGCCCTTAGATACCTT-GGGCCGCACGC  
GCGCTACAATGTATAAAACAAAAAGGT-----TCC-----TGGTCCGG-AAG--GA  
TT-GGGTAATCAATGAAATTTCTACGTAACCTGGGATTGGATCTTTGTAAT-AT-----  
-----  
-----

-----  
>MW660747\_Dictyostelium\_mucoroides\_5735\_3\_23\_HMJAU\_MR303  
TCTAAG-TATAAATCTTG-TACGATGAAA---CTGCAGACGGCTCATT--ACAA--CA  
---GT---GATAAACTG-CTAGACTTTCGG-GTTTTT---AACCTTTT-GGATAACCG  
CAGTAAATCGGGGCTAATACATAGAAG-CG-ATGGG-CGACTGGT----AAC-G-G-AA  
GCTCAGCGATTATT---A-GCA-TAA-CTA-CCAATAC--CTTC--GGGTCTTGT-GGT  
GAAACCGAATAATATTGCAGATCGAAG-----ATT-TATCTTCGACAAGTCTAATGT  
GTCACTGCCCTATCAACTTTCGATGGTACGGTATTGGCCTACCATGGTTGTAACGGGTAA  
CGGGGAATTAGGGTTCGATTCGGGAGAGGGAGCCTGAGAAATGGCTACCACTTCTACGGA  
AGGCAGCAGGCGCGCAAATT-ACTCAATCCCAATAC-GGGGAAGTAGTGACAATAAATAT  
CAATACCTATCC--TT-AATGGAGG--GCAATTGAAATGAACACAAAATTAATACTTTAA  
TT-AACACAATTGGAGGGCAAGTCTGGTGCCAGCAGCCGCGGTAAATCCAGCTCCAA-TA  
GCATATACTAAAGTTGTTGCAGTAAAA-AGC-TCGTAGTTGAAGTTAAAGGTTTATT-G  
GG-TCAA-----AGCTATTG-CCGCTCT-----GGTGGTTAAAT----A  
TGCTCCAGTATTTCTTTTT-TTTGAAAAATTG-TTCAGCTTGTATCAACTT-----TG  
TTGGTACTCGTTT-----GACATTTCACTGTGAGAAAA-TTGTGGTGTT  
TAAAGCA--GG-C--GTC--TC-GCCTGATCTTTTGCAGCATGGTATGATGAAACATG  
ACAT---TTTGCGC--TATTGGTT--GCG----TCTAAAGTGAATGATTAATAGGGAT  
GGATGGGGGTGTTCAATATTGGTGGGCGAGAGGTGAAATTCGTTGACCCTATCAAGATGAA  
CTTCTGCGAAAGCATTACCAAACTTCTCCATTAATCAAGAACGAAAGTTTGGGGATC  
GAAGACGATCAGATACCGTCGTAGTCCAACTATAAACTATGTGACCCAGGGATCGGTTA  
AA--AT-TTTTTAAAAATTAATCGGCACCTT-GTGAGAAATCAC-GAGTGTTTAGATTC  
CGGGGGGAGTATGGTTCGCAAGTCTGAACTTAAAGGAATTGACGGAAGGGCACACAATGG  
AGTGGAG-CCTGCGGCTTAATTT-GACTCAACTCGGGAAA-ACTTACCAAGCTAAGATAT  
AGTTAGGATTGACAGA-CTAA-AAGATCTTTTCATGATTCTATAAGTGGTGGTGCATGGTC  
GTTCTTAG-TTGGTGGAGCGATTTGCTGGTCAATTCCGATAACGGACGAGACCTCGACC  
TGCTAACTAGTAGTATTTATTA-GTCAATATGGGCGATAGCTTTTCTGGGATTTAG-AGC  
GATT---TC--GGTCGTT---TCT-GGTTTCAAGGAG---TGTGTAGTCTGACTTGA  
TAG--GTACGAATTA---AAAAA-----CTTCTTAGAGGGACTACCT-GCCTCAAGCAG  
GCGG-AAGTCCGAGGCAATAACAGGTCTGTGATGCCCTTAGATACCTT-GGGCCGACGC  
GCGCTACAATGTATAAAACAAAAAGGT----TCC-----TGGTCCGG-AAG--GA  
TT-GGGTAATCAATTGAATTTTCTACGTAACCTGGGATTG-ATCTTTGTAATTATTGATCA  
TAAACGAGGAATTCCTTGTAAGCGTAGGTCATTACCCTATGCTGAATATGTCCTGCCCT  
TTGTACACACCGCCCGTCTCTACCGATCGAATGATACGGTAAAGTTAACGGATAG--  
-----TTTT--ATCTTTGG-C-AAC-ATTGATA-----TAAA-TTA-AAAG--TTA  
-TT-TAAATCT--C----ATT--GTTT

>MW931857\_Dictyostelium\_robusticaule\_5729\_bai\_2021\_HMJAU\_MR305  
TCTAAG-TATAAATCTTG-TACGATGAAA---CTGCAGACGGCTCATT--ACAA--CA  
---GT---GATAAACTA-ATAGACTTTCGG-GTTTTT---AACCTTTT-GGATAACCG  
CAGTAAATCGGGGCTAATACATAGAAG-CG-ATGGG-TGACTGGC----AAC-G-G-AA  
GCTCAGCGATTATT---A-GCA-TTA-CTA-CCAATAC--CTTC--GGGTCTTGT-GGT  
GAAACCGAATAATATTGCAGATCGAGG-----ATT-TATCTTCGACAAGTCTACTGT  
GTCACTGCCCTATCAACTTTCGATGGTACGGTATTGGCCTACCATGGTTGTAACGGGTAA  
CGGGGAATTAGGGTTCGATTCGGGAGAGGGAGCCTGAGAAATGGCTACCACTTCTACGGA  
AGGCAGCAGGCGCGCAAATT-ACTCAATCCCAATAC-GGGGAAGTAGTGACAATAAATAT  
CAATACCTATCC--TT-AACGGAGG--GCAATTGAAATGAACACAAAATTAATACTTTAA  
TT-AACACAATTGGAGGGCAAGTCTGGTGCCAGCAGCCGCGGTAAATCCAGCTCCAA-TA  
GCATATACTAAAGTTGTTGCAGTAAAA-AGC-TCGTAGTTGAAGTTAAAGGTTTACT-G  
GG-CTAA-----AGTTATTG-CCGCTCT-----GGTGGTTAAAT----C  
AACTCCAGTATCTCTTTTT-TT----AATAG-TTCAGCTTCTATTATCTT-----TG  
ATAGTAGTTGTTT-----GACATTTCACTGTGAGAAAA-TTGTGGTGTT  
TAAAGCA--GG-C--GTT--TC-GCCTGATCTTTTGCAGCATGGTATGATGAAACATG  
ACAT---TTTACGC--TATTGGTT--GCG----TCTAAAGTGAATGATTAATAGGGAT  
GGATGGGGGTGTTCAATATTGGTGGGCGAGAGGTGAAATTCGTTGACCCTATCAAGATGAA  
CTTCTGCGAAAGCATTACCAAACTTCCCAATTAATCAAGAACGAAAGTTTGGGGATC  
GAAGACGATCAGATACCGTCGTAGTCCAACTATAAACTATGTGACCCAGGGATCGGTTA  
AA--AT-TTTTTAAAAATTAATCGGCACCTT-GTGAGAAATCAC-GAGTGTTTAGATTC  
CGGGGGGAGTATGGTTCGCAAGTCTGAACTTAAAGGAATTGACGGAAGGGCACACAATGG  
AGTGGAG-CCTGCGGCTTAATTT-GACTCAACTCGGGAAA-ACTTACCAAGCTAAGATAT  
AGTAAAGGATTGACAGA-CTAA-AAGATCTTTTCATGATTCTATAAGTGGTGGTGCATGGTC  
GTTCTTAG-TTGGTGGAGCGATTTGCTGGTCAATTCCGATAACGGACCTCGACC  
TGCTAACTAGTAGTATTTATTA-GTCAATATGGGCGATAGCTTCTCTGGGGTTTGG-AAT  
GGTT---TC--GGCCATC---TCC-TGCTTCAAGGAG---TGTGTAGTCTGACTTGA  
TAG--GTACGAATTA---AAAAA-----CTTCTTAGAGGGACTACCT-GCCTCAAGCAG  
GCGG-AAGTCCGAGGCAATAACAGGTCTGTGATGCCCTTAGATACCTT-GGGCCGACGC  
GCGCTACAATGTAGAAAAACAAAAAGGT----TCC-----TGGTCCGG-AAG--GA  
TT-GGGTAATCAATTTGAATTTTCTACGTAACCTGGGATTG-ATCTTTGTAATTATTGATCA  
TCAACGAGGAATTCCTTGTAAGCGTAGGTCATTACCCTATGCTGAATATGTCCTGCCCT  
TTGTACACACCGCCCGTCTCTACCGATCGAATGATACGGTAAAGTTAACGGATCG--  
-----TTTT--ATCTTTGG-C-AAC-ATTGATA-----TAAA-CTA-AAAG--TTA  
-TT-TAAATCT--C----ATT--GTT-

>MW931856\_Dictyostelium\_robusticaule\_5729\_huang\_2021\_HMJAU\_MR305



TCTAAG-TATAAATTCTTG-TACGATGAAA----CTGCAGACGGCTCATT--ACAA--CA  
---GT---GATAAACTA-ATAGACTTTCGG-GTTTTT---AACCTTTT-GGATAACCG  
CAGTAAATCGGGGCTAATACATAGAAAG-CG-ATGGG-TGACTGGC----AAC-G-G-AA  
GCTCAGCGATTATT---A-GCA-TTA-CTA-CCAATAC--CTTC--GGGTCTGT-GGT  
GAAACCGAATAATATTGCAGATCGAGG-----ATT-TATCTTCGACAAGTCTACTGT  
GTCACTGCCCTATCAACTTTCGATGGTACGGTATTGGCCTACCATGGTTGTAACGGGTAA  
CGGGGAATTAGGGTTCGATTCCGGAGAGGGAGCCTGAGAAAATGGTACCACCTTCTACGGA  
AGGCAGCAGGCGCGCAAATT-ACTCAATCCCAATAC-GGGGAAGTAGTGACAATAAATAT  
CAATACCTATCC--TT-AACGGAGG--GCAATTGAAATGAACACAAATTAATACTTTAA  
TT-AACACAATTGGAGGGCAAGTCTGGTGCCAGCAGCCGCGGTAATCCAGCTCCAA-TA  
GCATATACTAAAGTTGTTGCAGTTAAAA-AGC-TCGTAGTTGAAGTTAAAGGTTTACT-G  
GG-CTAA-----AGTTATTTG-CCGCTCT-----GGTGGTTAAAT----C  
AACTCCAGTATCTCTTTTTT-TT----AATAG-TTCAGCTTCTATTATCTT-----TG  
ATAGTAGTTGTTTTG-----GACATTTCACTGTGAGAAAA-TTGTGGTGTT  
TAAAGCA--GG-C---GTT--TC-GCCTGATCTTTTGCAGCATGGTATGATGAAACATG  
ACAT--TTTACGC--TATTGGTIT--GCG----TCTAAAAGTGAATGATTAATAGGGAT  
GGATGGGGGTGTTCAATTGGTGGGCGAGAGGTGAAATTCGTTGACCCTATCAAGATGAA  
CTTCTGCGAAAGCATTACCAAATACTTCCCATTAAATCAAGAACGAAAGTTTGGGGATC  
GAAGACGATCAGATACCGTAGTCCAAACTATAAACTATGTCCAGCAGGGATCGGTAA  
AA--AT-TTTTTAAAAATTTAATCGGCACCTT-GTGAGAAAATCAC-GAGTGTTTAGATTC  
CGGGGGGAGTATGGTCGAAGTCTGAAACTTAAAGGAATTGACGGAAGGGCACACAATGG  
AGTGGAG-CCTGCGGCTAATTT-GACTCAACTCGGGAAA-ACTTACCAAGCTAAGATAT  
AGTAAGGATTGACAGA-CTAA-AAGATCTTTCATGATTCTATAAGTGGTGGTGCATGGTC  
GTTCTTAG-TTGGTGGAGCGATTGTCTGGTCAATCCGATAACGGACGACCTCGACC  
TGCTAACTAGTAGTATTTATTA-GTCAATATGGGCGATAGCTTCTCTGGGGTTTGG-AAT  
GGTT---TC--GCCATC---TCC-TGCTTCAAGGAG---TGTGTAGTCTGACTTGA  
TAG--GTACGAATTA---AAAA-----CTTCTTAGAGGGACTACCT-GCCTCAAGCAG  
CGG-AAGTCCGAGGCAATAACAGGTCTGTGATGCCCTTAGATACCTT-GGGCCGACGC  
GCGCTACAATGTAGAAAACAAAAAGGT-----TCC-----TGGTCCGG-AAG---GA  
TT-GGGTAATCATTGGAATTTTACGTAACGGGATTG-ATCTTTGTAATTATTGATCA  
TCAACGAGGAATTCCTTGAAGCGTAGGTCATTACCCTATGCTGAATATGTCCCTGCCCT  
TTGTACACACCGCCGCTCCTACCGATCGAATGATACGGTAAAGTTAACGGATCG--  
-----TTTT--ATCTTTGG-C-AAC-ATTGATA-----TAAA-CTA-AAAAG--TTA  
-TT-TAAATCT--C---ATT--GTT-

>MW660750\_Cavenderia\_fasciculata\_5754\_2wang\_23\_HMJAU\_MR313

TCTAAG-TATAAGCTCTTG-TACGGCTA-GA---CTGCAGACGGCTCATT--ACAA--CG  
GTTGT-----AT---CTTACAGGGCATCCGG-GTCGCA---AGACCTTCT-GGATAACCG  
CAGTAAATCGGGGCTAATACATACAAA-CGGAGGGATGGAGAGGGC----AACCTGAAG  
TTTCTGCGATGGACATTTA-GCTATTC--GA-CCAACCC--CG-CAA-GGGAATG--GTT  
GAAACCGTTTCATATGCTAATCGACT-CTAGCTTGTAGTAGTCTGATAAGCCCTATAG  
ACAACCGCCCTATCAACTT--GATGGTAAGGTTTGGCTTACCATGGTTGTAACGGGTAA  
CGGGGAATCAGGGTTCGATTCCGGAGAGGACGCCTGAGAAACGGCGTCCACATCTACGGG  
TGGCAGCAGGCGCGTAAATT-GCCCAATCTCAACAGAGAGGAGGGCGGTGACAATAAATCC  
CGATGGCTTTGGGGCAACCCAGG--CTAATCAGAATAAGTACACATTAATCCCTTAA  
CC-AATATAAATTGGAGGCAAGTCTGGTGCAGCAGCGCGTAATTCCAGCTCCAA-TA  
GCATATACTAATGTTGTTGCAGTTAAAA-CGC-TCGTAGCT----TAATATCTTTT--G  
AG-CTAC-----TATCGACTGTC---ATCCTCTATG-TAG---CCGCAAGGT-GAAG  
TAGGAG-----GACCAGT-CGGCTCAAACAC-TGTAGGTCATG-----CGGC---TAG  
CAATA-GTTG-----CATAA---TCGACTGTGCATAAA-CCTTGATGCT  
CAAGGTA--GG-CCT-TT---ATAGGGTAGATACACAGT-GCATGGCATTGTGGAACAAG  
GCAT--CTCGCGCTTAGTTGGT-GGGC-----GCGGGGCAATGATTAATAGGGAG  
GAGCGGGGGCTTCATATTGCAGGGCGAGAGGTGAAATTCGTTGACCCTTGCAAGATGTC  
CTACAGCGAAAGCATTGGCCAAGTGCCTCCCCATTAGTCAAGAACGAAAGTTTGGGGATC  
AAAGACGATCAGATACCGTCTGATGCCAAACCATAAACTATGTCCAGCAGCGATTAGGCG  
GGCTACCTTCTTCGAGAGCTGCCTAGCAGCTT-GTGGGAAACCAT-GAGTGTGGACTC  
TGGGGGGAGTATGGTCGAAGGCTGAAACTTAAAGGAATTGACGGAAGGGCACACCATGG  
AGTGGAG-CCTGCGGCTAATTT-GACTCAACACGGGAAA-GCTTACCAAGCTCAGATAT  
GATTAGGATTGACAGA-CTAA-AAGATCTTTCATGATCCTAAGTGGTGGTGCATGGTC  
GTTCTTAG-TTGGTGGAGTGATTTGTGAGGTCAATTCCGGTAACGGACGAGACCTCGACC  
TGCTAACTAGTGGGATTCATTCTTCG--ATTGACGAGGCAGGTATTGC-TTTGATTATA  
G-----GGGGCAACTTT---TATAGTCGGG-TAGTGTGTAT-TAGTCTGGGAGAG  
TGG--GTTTCAA-AATTAATT---AATCTTCTAGAGGTACTTCTG-GCTTAAAGCCA  
GAGG-AAGTCCGAGGCAATAACAGGTCTGTGATGCCCTTAGATATCTT-GGGCCGACGC  
GTGCTACAATGTAGGCGCTAATGAGTT--TATTTACATCC--ATCTCCGC-AAG--GA  
GTATGGTAATC-TTGGAAATCCCCTGCGTGATTGGGCTTG-ACCACTGTAACGTG-GGTCA  
TCAACGAGGAATTCCTGTATGCGCGAGTCACTATCTCGCGAGAATCTGTCCCTGCCCT  
TTGTACACACCGCCGCTCCTACCGATCGAACGATCAGGTAAAGTGGACAGACT---  
-----GAAACCCG-C-AAG-GGTT-----TT-TGG--AAGT-CC-

A-T-TGAACCT--C---GCC--GTTT

>MW660751\_Cavenderia\_fasciculata\_5259\_1\_23\_HMJAU\_MR313

TCTA-G-TATAAGCTCTTG-TACGGCTA-GA---CTGCAGACGGCTCATT--ACAA--CG  
GTTGT-----AT---CTTACAGGGCATCCGG-GTCGCA---AGACCTTCT-GGATAACCG  
CAGTAAATCGGGGCTAATACATACAAA-CGGAGGGATGGAGAGGGC----AACCTGAAG

TTTCTGCGATGGACATTTA-GCTATTC--GA-CCAACCC--CG-CAA-GGGAATG--GTT  
GGAACCGGTTTCATATTGCTAATCGACT-CTAGCTTGTAGTAGTCTGATAAGCCCTATAG  
GCAACCGCCCTATCAACTT--GATGGTAAGGTTTTGGCTTACCATGGTTGTAACGGGTAA  
CGGGGAATCAGGGTTCGATTCGGGAGAGGACGCCTGAGAAACGGCGTCCACATCTACGGG  
TGGCAGCAGGCGCGTAAATT-GCCCAATCTCAACAGAGAGGAGGCGGTGACAATAAATCC  
CGATGGCTTTGGGGGCAACCCAGG--CTAATCAGAATAAGTACACATTAATCCCTTAA  
CC-AATAATAATTGGAGGGCAAGTCTGGTGCCAGCAGCCGCGTAATTCCAGCTCCAA-TA  
GCATATACTAATGTTGTTGCAGTTAAAA-CGC-TCGTAGCT----TAATATCTTTT--G  
AG-CTAC----TATCGACTGTC---ATCCTCTTATG-TAG---CCGCAAGGT-GAAG  
TAGGAG----GACCAGT-CGGCTCAAACAC-TGTAGGTCATG----CGGC----TAG  
CAATA-GTTG-----CATAA---TCGACTGTGCATAAAA-CCTTGATGCT  
CAAGGTA--GG-CCT-TT---ATAGGGTAGATACACAGT-GCATGGCATTGTGGAACAAG  
GCAT--CTCGCGCTTAGTTGGT-GGGCC-----GCGGGGGCAATGATTAATAGGGAG  
GAGCGGGGCTTCATATTGCAGGGCGAGAGGTGAAATTCGTTGACCCTTGCAAGATGTC  
CTACAGCGAAAGCATTTGGCCAATGCTCCCCATTAGTCAAGAACGAAAGTTGGGGATC  
AAAAGACGATCAGATACCGTCGTAGTCCAAACCATAAACTATGTCGACCAGCGATTAGGCG  
GGCTACCTTCTTCGAGAGCTGCCTAGCAGCTT-GTGGGAAACCAT-GAGTGCTTGGACTC  
TGGGGGGAGTATGGTCGCAAGGCTGAAACTTAAAGGAATTGACGGAAGGGCACACCATG  
AGTGGAG-CCTGCGGCTTAATTT-GACTCAACACGGGAAA-GCTTACCAAGCTCAGATAT  
GATTAGGATTGACAGA-CTAA-AAGATCTTTCATGATCTCATAAAGTGGTGGTGCATGGTC  
GTTCTTAG-TTGGTGGAGTGATTTGTCTAGGTC AATTCGGTAACGGACGAGACCTCGACC  
TGCTAACTAGTGGGATTCATCTTTCG--ATTGACGAGGCAGGTATTGC-TTTGATTATA  
G----GGGGCAACTTT----TATAGTCGGG-TAGTGCTTGTAT-TAGTCTGGGAGAG  
TGG--GTTTCAAA-AATTTAAT---AATCTTCTAGAGGTACTTCTG-GCTCTAAGCCA

-----  
-----  
-----  
-----  
-----  
-----

>MW660748 *Heterostelium pallidum*\_5759\_1\_23\_HMJAU\_MR314  
TCTAAG-TATAA-CCTTTA-TACGGTGAAA----CTGCAGACGGCTCAATT-ACAA--CA  
---GT---GATAAACTA-AAGAACTTCCGC-GCTTC-----GGCGTCTT-GGATAACCG  
CAGTAAATCGGGGCTAATACATATAAAA-CG-AGAGGGTGAGCGGG----CAACTGCG-AA  
CCTTTGCGATTGTT---A-GCTATCTTTTT--CA--CCAACCTTTCGGAGTTTGTGGT  
GAATCCGAACAATATTGCTGATCGAAA-----ATT-TATTTTCGACGAGTTCTTTGT  
GTC ACTGCCCTATCAACTTTCGATGGTAAGGTATTGGCTTACCATGGTTGTAACGGGTGA  
CGGGGAATCAGGGTTCGATTCGGGAGAGGGAGCCTGAGAAATGGCTACCCTTCTACGGA  
AGGCAGCAGGCGCGCAAATT-ACTCAATCCCAATAC-GGGGAAGTAGTGACAAAAAATAC  
TAATGCCTTTCATAT-TATGGGGG--GCAATTGGAATAAGTACAACCTAAATCGCTTAG  
CA-AAAGTGATTGGAGGGCAAGTCTGGTGCCAGCAGCCGCGTAATTCCAGCTCCAA-TA  
GCGTATACTAAAATTTGTTGCAGTTAAAA-AGC-TCGTAGTTGAGATTGAGATTCTTG-G  
GT-TTAAGCCAGTCATAGTAGCTTT--CGGGTATTATGA-T-TTCGGTAAAGCTTTTG  
AGTGGATTTTA-TTTTTCA-CTTTTAAAGTTA-CCAAGGATTCCAAGTGC-CCA--TG  
TAAGCTGGCAACAGTTT--AC-AATC--GGGTGATCTACTGTGAGAAAA-TTGTAGTGTT  
CAAAGCA--GG-C---GTC---TTACGTTTGTCAATGCAGCATGGTATAGTAAATATG  
ACAC---TAAATATAT-GTTGGTTG-TATA---TTCT-TAGTGTAAATGACTAATAGGGAA  
GGCGGGGCGCTTCAATTTGATGGGCGAGAGGTGAAATTCGTTGACCCTATCAAGATGCA  
CTACAGCGAAAGCATTCGGCAAGTACTTCTCCATTAATCAAGAACGAAAAGTTGGGGATC  
GAAGACGATCAGATACCGTCGTAGTCCAAACCATAAACTATGTCGACCAGGGATTGGACG  
GATAAT-TTTTTAAAAACTCGCTCAGAACCTT-GTGAGAAATCAT-GAGTGTGGACTC  
TGGGGGGAGTATGGTCGCAAGTCTGAAACTTAAAGGAATTGACGGAAGGGCACACAATGG  
AGTGGAA-CCTGCGGCTTAATTT-GACTCAACTCGGGAAA-ACTTACCAAGCTCAGATAT  
AATAAGGATTGACAGA-CTAA-AAGATCTTTCATGATTGTATAAGTGGTGGTGCATGGTC  
GTTCTTAG-TTGGTGGAGTGATTTGTCTGGTCAATTCCGATAACGGACGAGACCTTACC  
TGCTAACTAGTGGTATTTATTTGGTCAATATGGAAGATAGTCATT-TGGTGTGGT-GTC  
AGG----TCAAA---CTTG--GC-ATTCCTTATTGAG-TGGTGTGATTCTGGTCA  
TAG--GTACTAACTAAAAAATA---AA-CTTCTTAGAGGGACTACCT-ACCTCAAGTGG  
GGGGGAAGTCGGAGGCAATAACAGGTCTGTGATGCCCTTAGATACCTTTGGGCTGCACGC  
GCGTTACA-TGTAGATGAGAAAAAGGT---TTCC-----GA-----

-----  
-----  
-----  
-----

>MW660749 *Heterostelium pallidum*\_5759\_2\_23\_HMJAU\_MR314  
TCTAAG-TATAA-CCTTTA-TACGGTGAAA----CTGCAGACGGCTCATT-ACAA--CA  
---GT---GATAAACTA-AAGAACTTCCGC-GCTTC-----GGCGTCTT-GGATAACCG  
CAGTAAATCGGGGCTAATACATATAAAA-CG-AGAGGGTGAGCGGG----CAACTGCG-AA  
CCTTTGCGATTGTT---A-GCTATCTTTTT--CA--CCAACCTTTCGGAGTTTGTGGT  
GAATCCGAACAATATTGCTGATCGAAA-----ATT-TATTTTCGACGAGTTCTTTGT  
GTC ACTGCCCTATCAACTTTCGATGGTAAGGTATTGGCTTACCATGGTTGTAACGGGTGA

CGGGGAATCAGGGTTCGATTCCGGAGAGGGAGCCTGAGAAATGGCTACCCTTCTACGGA  
AGGCAGCAGGCGCGCAAATT-ACTCAATCCCAATAC-GGGGAAGTAGTGACAAAAAATAC  
TAATGCCTTTCCATAT-TATGGGGG--GCAATTGGAATAAGTACAACCTAAATCGCTTAG  
CA-AAAGTGATTGGAGGGCAAGTCTGGTGCCAGCAGCCGCGTAATTCCAGCTCCAA-TA  
GCGTATACTAAATTTGTTGCAAGTAAAA-AGC-TCGTAGTTGAGATTGAGATTCTTG-G  
GT-TTAAGCCAGTCATAGTACTTT--CGGGTTATTATGA-T-TTCGGTTAAAGCTTTTG  
AGTGGATTTTA-TTTTTCA-CTTTTAAAGTTA-CCAAGGGATTCCAACCTGC-CCA--TG  
TAAGCTGGCAACAGTTT--AC-AATC--GGGTGATCTACTGTGAGAAAA-TTGTAGTGT  
CAAAGCA--GG-C---GTC---TTACGTTTGTCAATGCAGCATGGTATAGTAAAAATAG  
ACAC---TAAATATAT-GTTGGTTG-TATA---TTCT-TAGTGAATGACTAATAGGGAA  
GGGCGGGGCCGTTTCATATTGATGGGCGAGAGGTGAAATTCGTTGACCCTATCAAGATGCA  
CTACAGCGAAAGCATTTCGGCAAGTACTTCTCCATTAATCAAGAACGAAAAGTTTGGGGATC  
GAAGACGATCAGATACCGTCGTAGTCCAAACCATAAACTATGTGACACAGGGATTGGACG  
GATAAT-TTTTTAAAAAATCGCTCAGAACCTT-GTGAGAAATCAT-GAGTGTGTTGGACTC  
TGGGGGAGTATGGTTCGCAAGTCTGAAACTTAAAGGAATTGACGGAAGGGCACACAATGG  
AGTGGAA-CCTGCGGCTTAATTT-GACTCAACTCGGGAAA-ACTTACCAAGCTCAGATAT  
AATAAGGATTGACAGA-CTAA-AAGATCTTTCATGATTGTATAAGTGGTGGTGCATGGTC  
GTTCTTAG-TTGGTGGAGTGATTTGTCTGGTCAATTCCGATAACGGACGAGACCTTACC  
TGCTAACTAGTGGTATTTATTTGGTCAATATGGAAGA-----

-----  
-----  
-----  
-----  
-----  
-----  
-----  
-----

>MW857293 Heterostelium recretum\_5756\_1\_17\_HMJAU\_MR315  
TCTAAG-TATAA-CCTTTA-TACGGTGAAA---CTGCAGACGGCTCATT--ACAA--CA  
---GT---GATAAACTA-AAGAACTTCCGC-GCTTC-----GGCGTTTT-GGATAACCG  
CAGTAAATCGGGCTAATACATGTAAA-CG-AGAGGATGAACGGG---CAACTGTG-AG  
TCTTTGCGATTGTT---A-GCT-TTAAAT---CA--CCAACCTCTTCGGAGTCAGTGGT  
GAATCCCTACAATATTGCTGATCGGAA-----ACT-TGTTCCGACGAGTTCTTTGT  
GTCACTGCCCTATCAACTTTCGATGGTAAGGTATTGGCTTACCATGGTTGTAACGGGTGA  
CGGGGAATCAGGGTTCGATTCCGGAGAGGGAGCCTGAGAAATGGCTACCCTTCTACGGA  
AGGCAGCAGGCGCGCAAATT-ACTCAATCCCAATAC-GGGGAAGTAGTGACAAAAAATAC  
TAATGCCTTTCCATTTATATGGGGG--GCAATTGGAATAAGTACAATTTAAATCGCTTAA  
CG-AAAGTGATTGGAGGGCAAGTCTGGTGCCAGCAGCCGCGTAATTCCAGCTCCAA-TA  
GCGTATACTAAATTTGTTGCAAGTAAAA-AGC-TCGTAGTTGAGATTGAGATTCTCA-G  
GT-TTAG--CGGTCAACTTTTTCGTTACCGGGTTAATG-TT-TGAT-ACGTAAAGCTTTAT  
AGTAGAATTTT-ATTTT-A-TTATTAAGTTA-CTGAGGAATTTCCAACCTGC-CCA--TG  
GTAGCCAGCAATGGTTA--TC-AATA--GGGTGATCTACTGTGAGAAAA-TTGTAGTGT  
CAAAGCA--GG-C---GTC---TTTCGTTTGTTCATGCAGCATGGTATAGTAAATATG  
ACAC---TAAATATAT-GTTGGTTG-TATA---T-CT-TAGTGAATGACTAATAGGGAA  
GGGCGGGGCCGTTTCATATTGATGGGCGAGAGGTGAAATTCGTTGACCCTATCAAGATGCA  
CTACAGCGAAAGCATTTCGGCAAGTACTTCTCCATTAATCAAGAACGAAAAGTTTGGGGATC  
GAAGACGATCAGATAACCGTCGTAGTCCAAACCATAAACTATGTGACACAGGGATTGGACG  
GATAAT-TTTTTAAAAAATCGCTCAGAACCTT-GTGAGAAATCAT-GAGTGTGTTGGACTC  
TGGGGGAGTATGGTTCGCAAGTCTGAAACTTAAAGGAATTGACGGAAGGGCACACAATGG  
AGTGGAA-CCTGCGGCTTAATTT-GACTCAACTCGGGAAA-ACTTACCAAGCTCAGATAT  
AATAAGGATTGACAGA-CTAA-AAGATCTTTCATGATTGTATAAGTGGTGGTGCATGGTC  
GTTCTTAG-TTGGTGGAGTGATTTGTCTGGTCAATTCCGATAACGGACGAGACCTTACT  
TACTAACTAGTGAATTTTGGTCAATATGGGAGATAGTCATT-TGGTGTGGTAGT-  
AGGA--CGTCAAAA-TCTTA---CTATTCTTCATTGAG-TGGTGTGATTCTGATCAGA  
TAG--GTACTAATTTTAAAAATA---AA-CTTCTTAGAAGGACTACCT-ACCTCAAGTGG  
GGGG-AAGTCGGAGGCAATAACAGGTCTGTGATGCCCTTAGATACCTT-GGGCTGCACGC  
GCGTTACAATGTAGGCGAGAAAAAGGT---TTCC-----GGAATCGA-AAG---GT  
TTC-GGTAATCAATTGAATTGCCTACGTAATGGGGATTA-ATTTTTGTAATTATCGATTA  
TCAACGAGGAATTCCTTGTAAAGCGTAAATCATTACTTTACGCTGAATATGTCCTGCCCT  
TTGTACACACCGCCGTCGCTCTACCGATCGAACGATTAGGTAATAACTGACGGACTA--  
--GGC-GACTCT--TC---CGC-A-AGG-ATTTGTT-----GTT-TGG-GAAG--TTA  
-GT-TAAATCT--C---ATT--GTT-

>X13160.1 Physarum polycephalum CL  
TCTCCGAATAGAAGAGCAAGTCTCTGAAT---CTGCGAACGGCTCCGCATACCAGTT  
GTAACCATAGCAAGCAAGCGCGTTGTTGCCGCAAGGCGACGGCGCGTTACAGGGAT  
AACCCCTGGTAATTCTGAGGCTAATAACAAGAACGTACCACCCGCTTCGACCCGTAAGGGGA  
GGGCGGGGGTTGTGTGACCCAG---GTCGCAAATATTAACCTGGGAGTGGCCAC--ACGAT  
CTGACCACCATAACAAACGGTTATCCGCTTCGAAAAGCTTCGGTGAGTAACGGCGGATTT  
TGGGTGGCTCTCGTGTGTCTCTGACCTATCAACT--AGATGGCAGCGTAACGGACAT  
GCCATGGTAACAACGGGTA-CAGAGGATAAGGGTTTCGATCCTGGAGAGTGGGCGTGAAG  
ATTGCTCACACTTCTAAGGAAGGCAGCAGGCGCGCAACGT-TCCCATTGGGCAAAGC--T  
CGAGGGCGTTAGGGGACATATGAATGCCTGCCT-----TATGGTGG--GCAATCAAATG

GGACTGTTTTAAACATCCTATCGAGTAACAATTAGAGGACAAGTCTGGTGCCAGCACCCG  
CGTAATCCAGCTCTAA-TAGCATACGTTAAAGTTGTTGCGGTTAAAA-CGC-TCGTAG  
TCGGCTCCAGACCTT CAGA--GCCTTGATTTCGGGACACTGGGT CAGCTGCTCTTCTCAA  
GAGCGCGCCAACTACTGATGATAGGGGACGTCGGTCAATCGTGCCCTGGGCTGTCTCCC  
CCCGGGGGAGTCACAGGGTCGTTACGCGGTCTTCGCGATCGCGGTTTCGGCTCGGCTCGGG  
G--TACCAATCACCATGATTA AAA-CCGTAGTGACCAAAGCA-----C---GTCT--TTAG  
ACGGGCACGGCACAGCATGG---GACGAAACGCACCCGGG--CTCGCCTTTTTTTGCGGG  
GGCG-----T GACTCGGTA AAAAGCGAAAGGGATGTTTCGAGGGTGACCGAATTGCTGGC  
GAGTGGTGAAATACGTTGACCCTAGCAAGTCGACCAAAGCGTAAGCAGTCATCAAGGGC  
ATTCCTGTTGATCAAGAGCGAAAAGTTAAGGGTTCGAAGACGATCAGATACCGTCGTAGTC  
TTAACTATAAATGATGCAGACCAGGGATAGGACAGT--GT-CCATCTCGACTCT--TCCG  
GACCTT--GGAGAAATCAC-GAGTCTATGGGTTCTGGGGGAGTATGGTCGCAAGGCTGA  
AACTTAAAGGAATTGACGGAAGGGCACACAA-AGAGTGGA-CCTGCGGCTTAATTT-GA  
CTCAACACGGGAAA-ACTCACCAGGTCCGGATACACGTATGAAAGTCAAG-CTGA-AAGA  
CTTACTCAATGATGTAAGTGGTGGTGCATGGTCGTTCTTAG-TTCGTGGATTGATTTGT  
CTGGTTTATTCCGATAACGAGCGAGACCCCGGCGTTC---CTAATAG-----  
----GGGTGGCAGCCAGACCG-----TC-----  
----GCAAG-----ACAGGTTAGCTCGCCAC----CTGAAGTT-----ATG--  
---CTTCTTAGACGTATCA----GAGCCGATAAGGTTCTTGAAATGGGTTAATAACAGGT  
CAGTCATGCCCTTAGATGTTCT-GGGCCGCACGCGGTTACAATGGCATGTAAAACGAGT  
GCT---TGAACAAGGCGTCCCACGGCCGAAA-GGTCGTGGTAACC--CTTAGTCCCTGC  
TTTGACTGGGACAG-ATCTTTGCAATTATTGGTCTCAAACGAGGAATTTTTAGTAATCGC  
AGGTCATTAACCTGCGTTGAATGCGTCCCTGCCCTTTGTACACACCCCGCCGTCGCTGCTA  
CCGATTGGGTTTTACAGTTACGCGTTCGGAGGAC-----GATGTT---TTCGGGTCTT  
AACGGGCTCCG-----GGGCGTCGG

**Text S2.** Alignment of *atp1* sequences on *Cavenderia* tree

>KF662075.1 *Cavenderia granulophora* CH11\_4  
GTATTAGGACAACCAATTGATGGAGGAGTTGAAAT--TAAAAATTCTAAAAATAC-----  
--AAGATTAATTAGTTTAGAAAAGAAAAGCACCAGGAATTGTTACAAGAAAATCTGTACAT  
GAATCTATGTTAACAGGAGTAAAAATCGTTGACGCATTATTACCAATTGGAAGAGGACAA  
CGTGAGTTAATCATTGGAGATCGTCAAACAGGAAAAATCTTCAGTAGCTATTGATGCAATT  
TTAAATCAAA---AAACTA--ATAAAGATATTGTT-----TGTGTTTATGTATCTGTAGG  
ACAAAAAAAATCTACAATTAGAAGATTAGTAGAAATGTTAAATATGAGAGGATCTTTAAA  
ATATAGTATTGTAGTAGTATCAACTGCATCAGATGCTTCTCCATTACAATTTTTAGCACC  
ATATACAGGATGTGCAATTGGAGAATATTTTCAGAGATAAAGGAGAACATGCTTTAATTAT  
TTATGACGATTTAAGTAAACATGCAGTAGCATACCGTCAAATGTCTTTATTATTAAGACG  
TCCTCCAGGACGA

>MZ318389 *Cavenderia fasciculata* 5259\_1\_23\_HMJAU\_MR313  
GTATTAGGACAACCAATCGATGGAGGAGTTGCATT--TAAAGATACAAAAACAAC-----  
--AAGATTAATCAGTTTAGAAAAGAAAAGCACCAGGAATTGTAAGTAAAAATCTGTACAT  
GAGTCAATGTTAACAGGAGTAAAAATGTTGATGCATTATTACCAATTGGAAGAGGACAA  
CGTGAATTAATTATTGGAGATCGTCAAACAGGTAATCTTCAATTGCAATTGATGCAATC  
TTAAATCAAA---AAACAA--ATAAAGATATTGTA-----TGTGTATACGTATCCGTAGG  
ACAAAAAAAATCAACAATTAGAAGATTAGTTGAAATGTTAAATGTTAAAGGTTCTTTAAA  
ATATAGTATTGTAGTAGTATCAACAGCGTCTGATGCATCTCCTTTACAATTTTTAGCACC  
ATATACAGGATGTGCAATCGGAGAATATTTTAGAGATAAAGGAGAACATGCTTTAATTAT  
TTATGATGATTTAAGTAAACATGCCGTAGCATACCGTCAAATGTCTTTATTATTAAGACG  
TCCTCCAGGAAGA

>MZ318390 *Cavenderia fasciculata* 5754\_2wang\_23\_HMJAU\_MR313  
GTATTAGGACAACCAATCGATGGAGGAGTTGCATT--TAAAGATACAAAAACAAC-----  
--AAGATTAATCAGTTTAGAAAAGAAAAGCACCAGGAATTGTAAGTAAAAATCTGTACAT  
GAGTCAATGTTAACAGGAGTAAAAATGTTGATGCATTATTACCAATTGGAAGAGGACAA  
CGTGAATTAATTATTGGAGATCGTCAAACAGGTAATCTTCAATTGCAATTGATGCAATC  
TTAAATCAAA---AAACAA--ATAAAGATATTGTA-----TGTGTATACGTATCCGTAGG  
ACAAAAAAAATCAACAATTAGAAGATTAGTTGAAATGTTAAATGTTAAAGGTTCTTTAAA  
ATATAGTATTGTAGTAGTATCAACAGCGTCTGATGCATCTCCTTTACAATTTTTAGCACC  
ATATACAGGATGTGCAATCGGAGAATATTTTAGAGATAAAGGAGAACATGCTTTAATTAT  
TTATGATGATTTAAGTAAACATGCCGTAGCATACCGTCAAATGTCTTTATTATTAAGACG  
TCCTCCAGGAAGA

>KF662113.1 *Cavenderia* sp. TH18D\_TH18D  
GTATTAGGACAACCAATTGATGGAGGAGTAGAATT--TAAAGATACAAAAACAAC-----  
--AAGATTAATTAGTTTAGAAAAGAAAAGCACCAGGAATTGTAACAAGAAAATCAGTACAT  
GAATCAATGTTAACAGGAGTAAAAATCGTAGATGCATTATTACCAATAGGAAGAGGACAA  
CGTGAATTAATTATTGGAGATCGTCAAACAGGAAAAATCATCAGTAGCAATTGATGCAATT  
TTAAATCAAA---AAACAA--ATAAAGATATTGTA-----TGTGTATACGTATCAGTAGG  
ACAAAAAAAATCAACAATTAGAAGATTAGTAGAAATGTTAAATTTAAAAGGATCTTTAAA  
ATATAGTATTGTAGTAGTATCAACAGCATCAGATGCATCACCATTACAATTTTAGCACC  
ATATACAGGATGTGCTATTGGAGAAATTTTCAGAGATAAAGGAGAACATGCTTTAATTAT  
TTATGATGATTTAAGTAAACATGCAGTAGCATATCGTCAAATGTCTTTATTATTAAGACG  
TCCTCCAGGACGA

>KF662112.1 *Cavenderia aureostipes* AU7B  
GTATTAGGACAACCAATTGATGGAGGAGTAGAATT--CAAAGATACAAAAACAAC-----  
--AAGATTAATTAGTTTAGAAAAGAAAAGCACCAGGAATTGTAACAAGAAAATCCGTACAT  
GAATCTATGTTAACAGGAGTAAAAATGTTAGATGCATTATTACCAATTGGAAGAGGACAA  
CGTGAATTAATTATTGGAGATCGTCAAACAGGAAAAATCTTCAGTAGCAATTGATGCAATT  
TTAAACCAAA---AAACAA--ATAAAGATATTGTA-----TGTGTATACGTATCAGTAGG  
ACAAAAAAAATCAACAATTAGAAGATTAGTAGAAATGTTAAACTTAAAAGGATCTTTAAA  
ATATAGTATTGTAGTAGTATCAACAGCATCAGATGCATCACCATTACAATTTTAGCACC  
TTATACAGGATGTGCAATTGGAGAATATTTTCAGAGATAAAGGAGAACATGCTTTAATTAT  
TTATGATGATTTAAGTAAACATGCAGTAGCATATCGTCAAATGTCTTTATTATTAAGACG  
TCCACCAGGACGA

>KF662123.1 *Cavenderia* sp. TH1A\_TH1A  
GTATTAGGACAACCAATTGATGGAGGAGTAGAATT--TAAAGATACAAAAACAAC-----  
--AAGATTAATTAGTTTAGAAAAGAAAAGCACCAGGAATTGTAACAAGAAAATCAGTACAT  
GAATCAATGTTAACAGGAGTAAAAATGTTAGATGCATTATTACCAATTGGAAGAGGACAA  
CGTGAATTAATTATTGGAGATCGTCAAACAGGAAAAATCTTCAGTAGCAATTGATGCAATT  
TTAAACCAAA---AAACAA--ATAAAGATATTGTT-----TGTGTATATGTATCAGTAGG  
ACAAAAAAAATCAACAATTAGAAGATTAGTAGAAATGTTAAATTTAAAAGGATCTTTAAA  
ATATAGTATTGTAGTAGTATCAACAGCATCAGATGCATCACCATTACAATTTTAGCACC  
TTATACAGGATGTGCTATTGGAGAATATTTTCAGAGATAAAGGAGAACATGCTTTAATTAT  
TTATGATGATTTAAGTAAACATGCAGTAGCATATCGTCAAATGTCTTTATTATTAAGACG  
TCCACCAGGACGA

>KF662116.1 *Cavenderia aureostipes* B15A  
GTATTAGGACAACCAATTGATGGAGGAGTAGAATT--TAAAGATACAAAAACAAC-----  
--AAGATTAATTAGTTTAGAAAAGAAAAGCACCAGGAATTGTAACAAGAAAATCCGTACAT

GAATCTATGTAAACAGGAGTAAAAATTGTAGATGCATTATTACCAATTGGAAGAGGACAA  
CGTGAATTAATTATTGGAGATCGTCAAACAGGAAAAATCTTCAGTAGCAATTGATGCAATT  
TAAATCAAA---AAACAA--ATAAAGATATTGTA-----TGTGTATACGTATCAGTAGG  
ACAAAAAAAATCAACAATTAGAAGATTAGTAGAAATGTTAAATTTAAAAGGATCTTTAAA  
ATATAGTATTGTAGTAGTATCAACAGCATCAGATGCATCACCATTACAATCTTAGCACC  
ATATACAGGATGTGCTATTGGAGAAATTTTCAGAGATAAAGGAGAACATGCTTTAATTAT  
TTATGATGATTTAAGTAAACATGCAGTAGCATATCGTCAAATGTCTTTATTATTAAGACG  
TCCTCCAGGACGA

>KF662117.1\_Cavenderia\_sp.\_TH39A\_TH39A

GTATTAGGACAACCAATTGATGGAGGAGTAGAATT--CAAAGATACAAAAACAAC-----  
--AAGATTAATTAGTTTAGAAAAGAAAAGCACCAGGAATTGTAACAAGAAAATCCGTACAT  
GAATCTATGTAAACAGGAGTAAAAATTGTAGATGCATTATTACCAATTGGAAGAGGACAA  
CGTGAATTAATTATTGGAGATCGTCAAACAGGAAAAATCTTCAGTAGCAATTGATGCAATT  
TAAATCAAA---AAACAA--ATAAAGATATTGTA-----TGTGTATACGTATCAGTAGG  
ACAAAAAAAATCAACAATTAGAAGATTAGTAGAAATGTTAAATTTAAAAGGATCTTTAAA  
ATATAGTATTGTAGTAGTATCAACAGCATCAGATGCATCACCATTACAATCTTAGCACC  
ATATACAGGATGTGCTATTGGAGAAATTTTCAGAGATAAAGGAGAACATGCTTTAATTAT  
TTATGATGATTTAAGTAAACATGCCGTAGCATATCGTCAAATGTCTTTATTATTAAGACG  
TCCTCCAGGACGA

>KF662122.1\_Cavenderia\_myxobasis\_NT2A

GTATTAGGACAACCAATTGATGGAGGAGTAGAATT--TAAAGATACAAAAACAAC-----  
--AAGATTAATTAGTTTAGAAAAGAAAAGCACCAGGAATTGTAACAAGAAAATCAGTACAT  
GAATCAATGTTAACAGGAGTAAAAATTGTAGATGCATTATTACCAATAGGAAGAGGACAA  
CGTGAATTAATTATTGGAGATCGTCAAACAGGAAAAATCTTCAGTAGCAATTGATGCAATT  
TAAACCAAA---AAACAA--ATAAAGATATTGTT-----TGTGTATATGTATCAGTAGG  
ACAAAAAAAATCAACAATTAGAAGATTAGTAGAAATGTTAAATTTAAAAGGATCTTTAAA  
ATATAGTATTGTAGTAGTATCAACAGCATCAGATGCATCACCATTACAATCTTAGCACC  
TTATACAGGATGTGCTATTGGAGAAATTTTCAGAGATAAAGGAGAACATGCTTTAATTAT  
TTATGATGATTTAAGTAAACATGCCGTAGCATACCGTCAAATGTCTTTATTATTAAGACG  
TCCCCAGGACGA

>KF662118.1\_Cavenderia\_aureostipes\_Thai2C1

GTATTAGGACAACCAATTGATGGAGGAGTAGAATT--TAAAGATACAAAAACAAC-----  
--AAGATTAATTAGTTTAGAAAAGAAAAGCACCAGGAATTGTAACAAGAAAATCCGTACAT  
GAATCAATGTTAACAGGAGTAAAAATCGTAGATGCATTATTACCTATTGGAAGAGGACAA  
CGTGAATTAATTATTGGAGATCGTCAAACAGGAAAAATCTTCAGTAGCAATTGATGCAATT  
TAAATCAAA---AAACAA--ATAAAGATATTGTG-----TGTGTATATGTATCCGTAGG  
ACAAAAAAAATCAACAATTAGAAGATTAGTAGAAATGTTAAATTTAAAAGGATCTTTAAA  
ATATAGTATTGTAGTAGTATCAACAGCATCAGATGCATCACCATTACAATCTTAGCACC  
TTATACAGGATGTGCTATTGGAGAAATTTTCAGAGATAAAGGAGAACATGCTTTAATTAT  
TTATGATGATTTAAGTAAACATGCAGTAGCCTACCGTCAAATGTCTTTATTATTAAGACG  
TCCACCAGGACGA

>KF662110.1\_Cavenderia\_stellata\_SAB7B

GTATTAGGACAACCAATTGATGGAGGAGTAGAATT--TAAAGATACAAAACTAC-----  
--AAGATTAATTAGTTTAGAAAAGAAAAGCACCAGGAATTGTAACACTAGAAAATCTGTACAT  
GAATCAATGTTAACAGGAGTAAAAATTGTAGATGCATTATTACCAATAGGAAGAGGTCAA  
CGTGAATTAATTATTGGAGATCGTCAAACAGGAAAAATCTTCAGTAGCAATAGATGCAATA  
TAAACCAAA---AAACAA--ATAAAGATATTGTA-----TGTGTATATGTCTCTGTAGG  
ACAAAAAAAATCTACAATAAGAAGATTAGTAGAAATGTTAAATAGTAAAGGATCTTTAAA  
ATATAGTATTGTAGTAGTATCAACAGCATCAGATGCATCCTTTACAATTTTAGCACC  
ATATACAGGATGTGCAATTGGAGAAATTTTCAGAGATAAAGGAGAACATGCATTAATTAT  
TTATGATGATTTAAGTAAACATGCAGTAGCTACCGTCAAATGTCTTTATTATTAAGACG  
TCCACCAGGACGA

>KF662120.1\_Cavenderia\_aureostipes\_OH396

GTATTAGGACAACCAATTGATGGAGGAGTAGAATT--TAAAGATACAAAAACAAC-----  
--AAGATTAATTAGTTTAGAAAAGAAAAGCACCAGGAATTGTAACAAGAAAATCAGTACAT  
GAATCAATGTTAACAGGAGTAAAAATTGTAGATGCATTATTACCAATTGGAAGAGGACAA  
CGTGAATTAATTATTGGAGATCGTCAAACAGGAAAAATCTTCAGTAGCAATTGATGCAATT  
TAAACCAAA---AAACAA--ATAAAGATATTGTT-----TGTGTATATGTATCCGTAGG  
GCAAAAAAAAATCAACAATTAGAAGATTAGTCGAAATGTTAAATTTAAAAGGATCTTTAAA  
ATATAGTATAGTAGTAGTATCAACAGCATCAGATGCATCCCCATTACAGTCTTAGCACC  
TTATACAGGATGTGCTATTGGAGAAATTTTCAGAGATAAAGGAGAACATGCTTTAATTAT  
TTATGATGATTTAAGTAAACATGCCGTAGCATACCGTCAAATGTCTTTATTATTAAGACG  
TCCACCAGGACGA

>KF662109.1\_Cavenderia\_aureostipes\_var.\_helvetia\_HM594

GTATTAGGACAACCAATTGATGGAGGAGTAGAATT--CAAAGATACAAAAACAAC-----  
--AAGATTAATCAGTTAGAAAAGAAAAGCACCAGGAATTGTAACAAGAAAATCAGTACAT  
GAATCTATGTAAACAGGAGTAAAAATCGTAGATGCCTTATTACCAATTGGAAGAGGACAA  
CGTGAATTAATCATTGGGGATCGTCAAACAGGAAAAATCATCAATAGCCATCGATGCAATA  
TAAACCAAA---GAACAA--ATAAAGATATTATT-----TGTGTATATGTATCAGTAGG  
ACAAAAAAAAGCAACAATTAGAAGATTAGTAGCAATGTTAAATATAAAAAGGAGCTTTAAA  
ATATAGTATAATCGTAGTATCAACAGCATCAGATGCATCACCATTACAATCTTAGCACC  
TTATACAGGATGTGCAATTGGAGAAATTTTCAGAGATAAAGGAGAACACGCATTAATTAT  
ATATGATGATTTAAGTAAACATGCCGTAGCATATCGTCAAATGTCTTTATTATTAAGACG

TCCACCAGGACGA

>KF662100.1\_Cavenderia aureostipes\_var\_helvetia\_52A1

GTATTAGGACAACCAATTGATGGAGGAGTAGAATT--CAAAGATACAAAAACAAC-----  
--AAGATTAATCAGCTTAGAAAAGAAAAGCACCAGGAATTGTAACAAGAAAATCAGTACAT  
GAATCTATGTAAACAGGAGTAAAAATCGTAGATGCCTTATTACCAATTGGAAGAGGACAA  
CGTGAATTAATCATTGGGGATCGTCAAACAGGAAAATCATCAATAGCTATCGATGCAATA  
TTAAACCAAAA---GAACAA--ATAAAGATATTATT-----TGTGTATATGTATCAGTAGG  
ACAAAAAAAAGCAACAATTAGAAGATTAGTAGCAATGTAAATATAAAAAGGAGCTTTAAA  
ATATAGTATAATCGTAGTATCAACAGCATCAGATGCATCACCATTACAATTCTTAGCACC  
TTATACAGGATGTGCAATTGGAGAAATTTTCAGAGATAAAGGAGAACACGCATTAATTAT  
ATATGATGATTTAAGTAAACATGCAGTAGCATATCGTCAAATGTCTTTATTATTAAGACG  
TCCACCAGGACGA

>KF662099.1\_Cavenderia aureostipes\_var\_helvetia\_HM593

GTATTAGGACAACCAATTGATGGAGGAGTAGAATT--CAAAGATACAAAAACAAC-----  
--CAGATTAATCAGCTTAGAAAAGAAAAGCACCAGGAATTGTAACAAGAAAATCAGTACAT  
GAATCTATGTAAACAGGAGTAAAAATCGTAGATGCCTTATTACCAATTGGAAGAGGACAA  
CGTGAATTAATCATTGGGGATCGTCAAACAGGAAAATCATCAATAGCTATCGATGCAATA  
TTAAACCAAAA---GAACAA--ATAAAGATATTATT-----TGTGTATATGTATCAGTAGG  
ACAAAAAAAAGCAACAATTAGAAGATTAGTAGCAATGTAAATATAAAAAGGAGCTTTAAA  
ATATAGTATAATCGTAGTATCAACAGCATCAGATGCATCACCATTACAATTCTTAGCACC  
TTATACAGGATGTGCAATTGGAGAAATTTTCAGAGATAAAGGAGAACACGCATTAATTAT  
ATATGATGATTTAAGTAAACATGCAGTAGCATATCGTCAAATGTCTTTATTATTAAGACG  
TCCACCAGGACGA

>KF662115.1\_Cavenderia aureostipes\_CR6B1

-----AAAACAAC-----  
--AAGATTAATGATTTAGAAAAGAAAAGCACCAGGAATTGTAACAAGAAAATCCGTACAT  
GAATCTATGTAAACAGGAGTAAAAATGTAGATGCATTATTACCAATAGGAAGAGGACAA  
CGTGAATTAATCATTGGAGATCGTCAAACAGGAAAATCTTCAGTAGCAATTGATGCAATT  
TTAAATCAAAA---AAACAA--ATAAAGATATTGTA-----TGTGTATATGTATCAGTAGG  
ACAAAAAAAATCAACAATTAGAAGATTAGTAGAAAATGTAAATTTAAAAGGATCTTTAAA  
ATATAGTATTGTAGTAGTATCAACAGCATCAGATGCATCACCATTACAATTCTTAGCACC  
ATATACAGGATGTGCTATTGGAGAAATTTTCAGAGATAAAGGAGAACATGCATTAATTAT  
TTATGATGATTTAAGTAAACATGCAGTAGCATATCGTCAAATGTCTTTATTATTAAGACG  
TCCACCAGGACGA

>KF662111.1\_Cavenderia bifurcata\_UK5

GTATTAGGACAACCAATTGATGGAGGTGTAGAAAT--TAAAGATACAAAAACAAC-----  
--AAGAGTTATAAGTTTAGAGAGAAAAGCTCCAGGAATTGTAAGTAAAAATCTGTACAT  
GAGTCTATGTAAACAGGAGTAAAAATGTAGATGCATTATTACCTATAGGAAGAGGACAA  
CGTGAATTAATTATTGGAGATCGTCAAACAGGAAAATCTTCAGTAGCTATTGATGCAATT  
TTAAATCAAAA---AAACAA--ATAAAGATATAATA-----TGTGTATATGTATCTGTAGG  
ACAAAAAAAAGCAACAATTAGAAGATTAGTAGAAAATGTAAATTTAAAAGGATCATTAAA  
ATATAGTATTGTAGTAGTATCAACAGCATCTGATGCATCACCATTACAATTTTTAGCACC  
ATATACAGGATGTGCTATTGGAGAAATTTTAGAGATAAAGGAGAACATGCATTAATTAT  
TTATGATGATTTAAGTAAACATGCTGTAGCTTACCGTCAAATGTCTTTATTATTAAGACG  
TCCACCAGGACGA

>EU275727.1\_Cavenderia fasciculata\_SH3

GTATTAGGACAACCAATTGATGGAGGAGTCGCATT--TAAAGATACAAAAACAAC-----  
--AAGATTAATCAGTTTAGAAAAGAAAAGCCCCAGGAATTGTAAGTAAAAATCTGTACAT  
GAGTCAATGTAAACAGGAGTAAAAATGTGATGCATTATTACCAATTGGAAGAGGACAA  
CGTGAATTAATTATTGGAGATCGTCAAACAGGTAATCTTCAATTGCAATTGATGCAATC  
TTAAATCAAAA---AAACAA--ACAAAGATATTGTA-----TGTGTATACGTATCCGTAGG  
ACAAAAAAAATCAACAATTAGAAGATTAGTTGAAAATGTAAATGTAAAGGTTCTTTAAA  
ATATAGTATTGTAGTAGTATCAACAGCGTCTGATGCTTACCTTTACAGTTTTTAGCACC  
TTATACAGGATGTGCTATTGGAGAAATTTTAGAGATAAAGGAGAACATGCTTTAATTAT  
TTATGACGATTTAAGTAAACATGCCGTAGCATACCGTCAAATGTCTTTATTATTAAGACG  
TCCACCAGGAAGA

>KF662084.1\_Cavenderia aureostipes\_KAL7A

GTATTAGGACAACCAATCGATGGAGGAGTTGCATT--TAAAGATACAAAAACAAC-----  
--AAGATTAATCAGTTTAGAAAAGAAAAGCACCAGGAATTGTAAGTAAAAATCTGTACAT  
GAGTCAATGTAAACAGGAGTAAAAATGTGATGCATTATTACCAATTGGAAGAGGACAA  
CGTGAATTAATTATTGGAGATCGTCAAACAGGTAATCTTCAATTGCAATTGATGCAATC  
TTAAATCAAAA---AAACAA--ATAAAGATATTGTA-----TGTGTATACGTATCCGTAGG  
ACAAAAAAAATCAACAATTAGAAGATTAGTTGAAAATGTAAATGTAAAGGTTCTTTAAA  
ATATAGTATTGTAGTAGTATCAACAGCGTCTGATGCATCTCCTTTACAATTTTTAGCACC  
ATATACAGGATGTGCAATCGGAGAAATTTTAGAGATAAAGGAGAACATGCTTTAATTAT  
TTATGATGATTTAAGTAAACATGCCGTAGCATACCGTCAAATGTCTTTATTATTAAGACG  
TCCACCAGGACGA

>KF662082.1\_Cavenderia aureostipes\_Chile10B1

GTATTAGGACAACCAATCGATGGAGGAGTTGCATT--TAAAGATACAAAAACAAC-----  
--AAGATTAATCAGTTTAGAAAAGAAAAGCACCAGGAATTGTAAGTAAAAATCTGTACAT  
GAGTCAATGTAAACAGGAGTAAAAATGTGATGCATTATTACCAATTGGAAGAGGACAA  
CGTGAATTAATTATTGGAGATCGTCAAACAGGTAATCTTCAATTGCAATTGATGCAATC  
TTAAATCAAAA---AAACAA--ATAAAGATATTGTA-----TGTGTATACGTATCCGTAGG

ACAAAAAAAAATCAACAATTAGAAGATTAGTTGAAATGTTAAATGTTAAAGGTTCTTTAAA  
ATATAGTATTGTAGTAGTCTCATCAGCGTCTGATGCATCACCTTTACAATTTTTAGCACC  
ATATACAGGATGTGCAATCGGAGAATATTTTAGAGATAAAGGAGAACATGCTTTAATTAT  
TTATGATGATTTAAGTAAACATGCCGTAGCATACCGTCAAATGTCTTTATTATTAAGACG  
TCCTCCAGGACGA

>KF662083.1\_Cavenderia\_aureostipes\_GSE7B

GTATTAGGACAACCAATCGATGGCGGAGTTGCATT--TAAAGATACAAAAACAAC----  
--AAGATTAATCAGTTTAGAAAAGAAAAGCACCAGGAATTGTAAGTAAAGAAAATCTGTACAT  
GAGTCAATGTTAACAGGAGTAAAAATTGTTGATGCATTATTACCAATTGGAAGAGGACAA  
CGTGAATTAATTATTGGAGATCGTCAAACAGGTAATCTTCAATTGCAATTGATGCAATC  
TTAAATCAAA---AAACAA--ATAAAGATATTGTA-----TGTGTATACGTATCCGTAGG  
ACAAAAAAAATCAACAATTAGAAGATTAGTTGAAATGTTAAATGTTAAAGGTTCTTTAAA  
ATATAGTATTGTAGTAGTATCAACAGCGTCTGATGCATCTCTTTACAATTTTTAGCACC  
ATATACAGGATGTGCAATCGGAGAATATTTTAGAGATAAAGGAGAACATGCTTTAATTAT  
TTATGATGATTTAAGTAAACATGCCGTAGCATACCGTCAAATGTCTTTATTATTAAGACG  
TCCTCCAGGACGA

>KF662073.1\_Cavenderia\_mexicana\_TF4B1

GTATTAGGACAACCAATCGATGGAGGAGTTGAAAT--TAAAGATACAAAACTAC----  
--TAGATTAATTAGTTTAGAAAAGAAAAGCTCCAGGAATTGTAAGTAAAGAAAATCTGTACAT  
GAATCTATGTTAAGTGGAGTAAAAATTGTTGATGCATTATTACCAATTGGAAGAGGACAA  
CGTGAATTAATTATTGGAGATCGTCAAACAGGAAAATCTTCTATTGCAATTGATTCAATT  
TTAAATCAAA---AAACTA--ATAAAGATATTGTA-----TGTGTTTATGTTCTGTAGG  
ACAAAAAAAATCAACAATTAGAAGATTAGTAGAAAATGTTAAATATGAAAGGTTCTTTAAA  
ATATAGTATTGTAGTTGATGCCAGCTTCTGATGCATCTCCTTTACAATTTTTAGCACC  
TTATACAGGATGTGCAATTGGAGAAATATTTTAGAGATAAAGGAGAACATGCTTTAATCAT  
TTATGATGATTTAAGTAAACATGCAGTAGCTTACCGTCAAATGTCTTTATTATTAAGACG  
TCCACCAGGACGA

>KF662080.1\_Cavenderia\_delicata\_TNS\_266

GTATTAGGACAACCAATCGATGGAGGAGTTGCATT--TAAAGATACAAAAACAAC----  
--AAGATTAATCAGTTTAGAAAAGAAAAGCACCAGGAATTGTAAGTAAAGAAAATCTGTACAT  
GAGTCAATGTTAACAGGAGTAAAAATTGTTGATGCATTATTACCAATTGGAAGAGGACAA  
CGTGAATTAATTATTGGAGATCGTCAAACAGGTAATCTTCAATTGCAATTGATGCAATC  
TTAAATCAAA---AAACAA--ATAAAGATATTGTA-----TGTGTATACGTATCCGTAGG  
ACAAAAAAAATCTACAATTAGAAGATTAGTTGAAATGTTAAATGTTAAAGGTTCTTTAAA  
ATATAGTATTGTAGTAGTATCAACAGCGTCTGATGCATCACCTTTACAATTTTTAGCACC  
TTATACAGGATGTGCAATCGGAGAATATTTTAGAGATAAAGGAGAACATGCTTTAATCAT  
CTATGATGATTTAAGTAAACATGCCGTAGCATACCGTCAAATGTCTTTATTATTAAGACG  
TCCTCCAGGACGA

>KF662127.1\_Cavenderia\_aureostipes\_BP7B

GTATTAGGACAACCAATCGATGGAGGAGTGAAT--TAAAGATACTAAAACACTAC----  
--TAGATTAATTAGTTTAGAAAAGAAAAGCACCAGGAATTGTAACCAGAAAATCTGTACAT  
GAATCTATGTTAACAGGAGTAAAAATTGTAGATGCATTATTACCAATTGGTAGAGGACAA  
CGTGAGTTAATTATTGGAGATCGTCAAACAGGAAAATCTTCAGTAGCAATTGATGCAATC  
TTAAATCAAA---AAACAA--ACAAAAGATATTGTT-----TGTGTATATGTATCCGTAGG  
ACAAAAAAAATCAACAATTAGAAGATTAGTTGAAATGTTAAATGTTAAAGGATCTTTAAA  
ATATAGTATTGTAGTAGTATCCACAGCATCAGATGCTTCTCCATTACAATTTTTAGCACC  
TTATACAGGATGTGCTATTGGAGAATATTTTAGAGATAAAGGAGAACATGCATTAATTAT  
TTATGATGATTTAAGTAAACATGCTGTTGCTTACCGTCAAATGTCTTTATTATTAAGACG  
TCCTCCAGGACGA

>KF662094.1\_Cavenderia\_aureostipes\_Got5B4

GTATTAGGACAACCAATCGATGGAGGAGTGCATT--TAAAGATACAAAAACAAC----  
--AAGATTAATCAGTTTAGAAAAGAAAAGCCCCAGGAATTGTAAGTAAAGAAAATCTGTACAT  
GAGTCAATGTTAACAGGAGTAAAAATTGTTGATGCATTATTACCAATTGGAAGAGGACAA  
CGTGAATTAATTATTGGAGATCGTCAAACAGGTAATCTTCAATTGCAATTGATGCAATC  
TTAAATCAAA---AAACAA--ACAAAAGATATTGTA-----TGTGTATACGTATCCGTAGG  
ACAAAAAAAATCAACAATTAGAAGATTAGTTGAAATGTTAAATGTTAAAGGTTCTTTAAA  
ATATAGTATTGTAGTAGTATCAACAGCGTCTGATGCTTACCTTTACAGTTTTTAGCACC  
ATATACAGGATGTGCCAATTGGAGAATATTTTAGAGATAAAGGAGAACATGCTTTAATTAT  
TTATGACGATTTAAGTAAACATGCAGTAGCATACCGTCAAATGTCTTTATTATTAAGACG  
TCCACCAGGACGA

>KF662081.1\_Cavenderia\_antarctica\_NZ43B

GTATTAGGACAACCAATCGATGGAGGAGTTGCATT--TAAAGATACAAAAACAAC----  
--AAGATTAATCAGTTTAGAAAAGAAAAGCACCAGGAATTGTAAGTAAAGAAAATCTGTACAT  
GAGTCAATGTTAACAGGAGTAAAAATTGTTGATGCCTTATTACCAATTGGAAGAGGACAA  
CGTGAATTAATTATTGGAGATCGTCAAACAGGTAATCTTCAATTGCAATTGATGCAATC  
TTAAATCAAA---AAACAA--ATAAAGATATTGTA-----TGTGTATACGTATCAGTAGG  
ACAAAAAAAATCAACAATTAGAAGATTAGTTGAAATGTTAAATGTTAAAGGTTCTTTAAA  
ATATAGTATTGTAGTAGTATCATCAGCGTCTGATGCATCTCTTTACAATTTTTAGCACC  
ATATACAGGATGTGCAATCGGAGAATATTTTAGAGATAAAGGAGAACATGCTTTAATTAT  
TTATGATGATTTAAGTAAACATGCCGTAGCCTACCGTCAAATGTCTTTATTATTAAGACG  
TCCTCCAGGACGA

>KF662124.1\_Cavenderia\_aureostipes\_LR2

GTATTAGGACAACCAATCGATGGAGGAGTGAAT--TAAAGATACTAAAACACTAC----



--AAGATTAATTAGTTTAGAAAAGAAAAGCACCAGGAATTGTAACAAGAAAATCTGTACAT  
GAATCTATGTTAACAGGAGTAAAAATCGTTGATGCATTATTACCTATAGGTAGAGGACAA  
CGTGAATTAATTATCGGAGATCGTCAAACAGGAAAACTTCCGTAGCAATCGATGCAATT  
TTAAATCAAA---AAACAA--ACAAAGATATTGTA----TGTGTCTATGTATCCGTTGG  
ACAAAAAAAATCAACAATTAGAAGATTAGTTGAAATGTTAAACATGAAAGGATCTTTAAA  
ATATAGTATTGTAGTAGTATCAACCGCATCAGATGCTTCACCATTACAATTTTTAGCACC  
TTATACAGGATGTGCAATTGGAAATATTTTCAGAGATAAAAGGGGAACATGCATTAATTAT  
TTATGATGATTTAAGTAAACATGCTGTAGCTTACCGTCAAATGTCTTTATTATTAAGACG  
TCCACCAGGACGA

>KF662095.1 *Cavenderia aureostipes*\_AKL43C

GTATTAGGACAACCAATTGATGGAGGAGTTCGCATT--TAAAGATACAAAAACAAC----  
--AAGATTAATCAGTTTAGAAAAGAAAAGCCCCAGGAATTGTAACACTAGAAAATCTGTACAT  
GAGTCAATGTTAACAGGAGTAAAAATGTTGATGCATTATTACCAATTGGAAGAGGACAA  
CGTGAATTAATTATTGGAGATCGTCAAACAGGTAATCTTCAATTGCAATTGATGCAATC  
TTAAATCAAA---AAACAA--ACAAAGATATTGTA----TGTGTATACGTATCCGTAGG  
ACAAAAAAAATCAACAATTAGAAGATTAGTTGAAATGTTAAATGTTAAAGGTTCTTTAAA  
ATATAGTATTGTAGTAGTATCAACAGCGTCTGATGCTTCACCTTTACAGTTTTTAGCACC  
ATATACAGGATGTGCCATTGGAGAAATTTTAGAGATAAAAGGAGAACATGCTTTAATTAT  
TTATGACGATTTAAGTAAACATGCCGTAGCATACCGTCAAATGTCTTTATTATTAAGACG  
TCCACCAGGACGA

>KF662130.1 *Cavenderia aureostipes*\_KP3

GTATTAGGACAACCAATTGATGGGGGGGTAGAATT--TAAAGATACTAAAACACTAC----  
--TAGATTAATTAGTTTAGAAAAGAAAAGCACCAGGAATTGTAACAAGAAAATCTGTACAT  
GAATCTATGTTAACTGGGGTAAAAATGTTAGATGCATTATTACCAATTGGTAGAGGTCAA  
CGTGAGTTAATTATTGGAGATCGTCAAACAGGAAAACTTCTGTAGCAATTGATGCAATT  
TTAAATCAAA---AAACTA--ATAAAGATATTGTA----TGTATATATGTATCCGTAGG  
ACAAAAAAAATCAACAATTAGAAGATTAGTTGAAATGTTAAATATGAAAGGATCTTTAAA  
ATATAGTATTGTAGTAGTATCAACAGCGTCTGATGCTTCACCTTTACAGTTTTTAGCACC  
ATATACAGGATGTGCCATTGGAGAAATTTTAGAGATAAAAGGGGAACATGCATTAATTAT  
TTATGATGATTTAAGTAAACATGCTGTTGCTTACCGTCAAATGTCTTTATTATTAAGACG  
TCCACCAGGACGA

>KF662092.1 *Cavenderia aureostipes*\_Got9A1

GTATTAGGACAACCAATTGATGGAGGAGTTCGCATT--TAAAGATACAAAAACAAC----  
--AAGATTAATCAGTTTAGAAAAGAAAAGCCCCAGGAATTGTAACACTAGAAAATCTGTACAT  
GAGTCAATGTTAACAGGAGTAAAAATGTTGATGCATTATTACCAATTGGAAGAGGACAA  
CGTGAATTAATTATTGGAGATCGTCAAACAGGTAATCTTCAATTGCAATTGATGCAATC  
TTAAATCAAA---AAACAA--ACAAAGATATTGTA----TGTGTATACGTATCCGTAGG  
ACAAAAAAAATCAACAATTAGAAGATTAGTTGAAATGTTAAATGTTAAAGGTTCTTTAAA  
ATATAGTATTGTAGTAGTATCAACAGCGTCTGATGCTTCACCTTTACAGTTTTTAGCACC  
TTATACAGGATGTGCCATTGGAGAAATTTTAGAGATAAAAGGAGAACATGCTTTAATTAT  
TTATGACGATTTAAGTAAACATGCCGTAGCATACCGTCAAATGTCTTTATTATTAAGACG  
TCCACCAGGACGA

>KF662076.1 *Cavenderia fasciculata*\_HM595

GTATTAGGACAACCAATCGATGGAGGAGTTGCATT--TAAAGATACAAAAACAAC----  
--AAGATTAATCAGTTTAGAAAAGAAAAGCCCCAGGAATTGTAACACTAGAAAATCTGTACAT  
GAGTCAATGTTAACAGGAGTAAAAATGTTGATGCATTATTACCAATTGGAAGAGGACAA  
CGTGAATTAATTATTGGAGATCGTCAAACAGGTAATCTTCAATTGCAATTGATGCCATC  
TTAAATCAAA---AAACAA--ACAAAGATATTGTC----TGTGTATACGTATCAGTAGG  
ACAAAAAAAATCAACAATTAGAAGATTAGTTGAAATGTTAAATGTTAAAGGTTCTTTAAA  
ATATAGTATTGTAGTTGTATCAACAGCGTCTGATGCTTCACCTTTACAATTTTTAGCACC  
TTATACAGGATGTGCCATTGGAGAAATTTTCAGAGATAAAAGGAGAACATGCTTTAATTAT  
TTATGATGATTTAAGTAAACATGCAGTAGCTTACCGTCAAATGTCTTTATTATTAAGACG  
TCCACCAGGACGA

>KF662133.1 *Cavenderia aureostipes*\_I3

GTATTAGGACAACCAATTGATGGGGCGTAGAATT--TAAAGATACTAAAACACTAC----  
--TAGATTAATTAGTTTAGAAAAGAAAAGCACCAGGAATTGTAACAAGAAAATCTGTACAT  
GAATCTATGTTAACTGGGGTAAAAATGTTAGATGCATTATTACCAATTGGTAGAGGTCAA  
CGTGAGTTAATTATTGGAGATCGTCAAACAGGAAAACTTCTGTAGCAATTGATGCAATT  
TTAAATCAAA---AAACTA--ATAAAGATATTGTA----TGTATATACGTATCCGTAGG  
ACAAAAAAAATCAACAATTAGAAGATTAGTTGAAATGTTAAATATGAAAGGATCTTTAAA  
ATATAGTATTGTAGTAGTATCTACAGCATCTGATGCTTCACCTTTACAATTTTTAGCACC  
ATATACAGGATGTGCCATTGGAGAAATTTTAGAGATAAAAGGGGAACATGCATTAATTAT  
TTATGATGATTTAAGTAAACATGCAGTAGCTTACCGTCAAATGTCTTTATTATTAAGACG  
TCCACCAGGACGA

>KF662131.1 *Cavenderia aureostipes*\_OH110\_BW6

GTATTAGGACAACCAATTGATGGGGGAGTAGAATT--TAAAGATACTAAAACACTAC----  
--TAGATTAATTAGTTTAGAAAAGAAAAGCACCAGGAATTGTAACAAGAAAATCTGTACAT  
GAATCTATGTTAACTGGGGTAAAAATGTTAGATGCATTATTACCAATTGGTAGAGGTCAA  
CGTGAGTTAATTATTGGGGATCGTCAAACAGGAAAACTTCTGTAGCAATTGATGCAATT  
TTAAATCAAA---AAACTA--ATAAAGATATTGTA----TGTATATACGTATCCGTAGG  
ACAAAAAAAATCAACAATTAGAAGATTAGTTGAAATGTTAAATATGAAAGGATCTTTAAA  
ATATAGTATTGTAGTAGTATCTACAGCATCTGATGCTTCACCTTTACAATTTTTAGCACC  
ATATACAGGATGTCTATTGGAGAAATTTTAGAGATAAAAGGGGAACATGCATTAATTAT

TTATGATGATTTAAGTAAACATGCTGTTGCTTACCGTCAAATGTCTTTATTATTAAGACG  
TCCACCAGGACGA  
>KF662077.1\_Cavenderia\_fasciculata\_Nor84E  
GTATTAGGACAACCAATCGATGGAGGAGTTGCATT--TAAAGATACAAAAACAAC----  
--AAGATTAATCAGTTTAGAAAAGAAAAGCCCCAGGAATTGTAAGTAACTAGAAAATCTGTACAT  
GAGTCAATGTTAACAGGAGTAAAAATTGTTGATGCATTATTACCAATTGGAAGAGGACAA  
CGTGAATTAATTATTGGAGATCGTCAAACAGGTAATCTTCAATTGCAATTGATGCCATC  
TTAAATCAAA---AAACAA--ACAAAGATATTGTC-----TGTGTATACGTATCAGTAGG  
ACAAAAAAAATCAACAATCAGAAGATTAGTTGAAATGTTAAATGTTAAAGGTTCTTTAAA  
ATATAGTATTGTAGTTGTATCAACAGCGTCTGATGCTTCACCTTTACAATTTTTAGCACC  
TTATACAGGATGTGCCATTGGAGAATATTTTCAGAGATAAAGGAGAACATGCTTTAATTAT  
TTATGATGATTTAAGTAAACATGCAGTAGCTTACCGTCAAATGTCTTTATTATTAAGACG  
TCCACCAGGACGA  
>KF662088.1\_Cavenderia\_aureostipes\_OH438  
GTATTAGGACAACCAATCGATGGAGGAGTTGCATT--TAAAGATACAAAAACAAC----  
--AAGATTAATCAGTTTAGAAAAGAAAAGCACCAGGAATTGTAAGTAACTAGAAAATCTGTACAT  
GAGTCAATGTTAACAGGAGTAAAAATTGTTGATGCATTATTACCAATTGGAAGAGGACAA  
CGTGAATTAATTATTGGAGATCGTCAAACAGGTAATCTTCAATTGCAATTGATGCAATC  
TTAAATCAAA---AAACAA--ATAAAGATATTGTA-----TGTGTATACGTATCCGTAGG  
ACAAAAAAAATCAACAATCAGAAGATTAGTTGAAATGTTAAATGTTAAAGGTTCTTTAAA  
ATATAGTATTGTAGTAGTATCAACAGCGTCTGATGCATCTCCTTTACAATTTTTAGCACC  
ATATACAGGATGTGCAATCGGAGAATATTTTAGAGATAAAGGAGAACATGCTTTAATTAT  
TTATGATGATTTAAGTAAACATGCCGTAGC-----  
-----  
>KF662074.1\_Cavenderia\_medusoides\_OH592  
GTATTAGGACAACCAATTGATGGAGGAGTTGAAAT--TAAAAATTCTAAAAATAC----  
--AAGATTAATTAGTTTAGAAAAGAAAAGCACCAGGAATTGTAACAAGAAAATCTGTACAT  
GAATCTATGTTAACTGGAGTAAAAATCGTTGATGCTTTATTACCTATTGGAAGAGGGCAA  
CGTGAATTAATTATTGGAGATCGTCAAACAGGAAAACTTCAGTAGCTATTGATGCAATT  
TTAAATCAAA---AAACTA--ATAAAGATATTATT-----TGTGTTATGTATCTGTAGG  
GCAAAAAAAAATCAACAATTAGAAGATTAGTAGAAATGTTAAATATGAGAGGTTCTTTAAA  
ATATAGTATTGTAGTAGTATCAGCATCAGATGCTTCTCCATTACAATTTTTAGCACC  
ATATACAGGATGTGCTATTGGAGAAATTTTTAGAGATAAAGGAGAACATGCTTTAATTAT  
TTATGATGATTTAAGTAAACATGCAGTAGCTTATCGTCAAATGTCTTTATTATTAAGACG  
TCCACCAGGACGA  
>KF662098.1\_Cavenderia\_aureostipes\_var.\_helvetia\_HM592  
-----GATACAAAAACAAC-----  
--CAGATTAATCAGCTTAGAAAAGAAAAGCACCAGGAATTGTAACAAGAAAATCAGTACAT  
GAATCTATGTTATCAGGAGTAAAAATAGTTGATGCCTTTTTCCAATTGGAAGGGGGCAA  
CGTGAATTAATCATTGGGATCGTCAAACAGGAAAAATCATCAATAGCTATCGATGCAATA  
TTAAACCAAA---GAACAA--ATAAAGATATTATT-----TGTGTATATGTATCAGTAGG  
ACAAAAAAAAGCAACAATTAGAAGATTAGTAGCAATGTTAAATATAAAGGAGCTTTAAA  
ATATAGTATAATCGTAGTATCAACAGCATCAGATGCATCACCATTACAATCTTAGCACC  
TTATACAGGATGTGCAATTGGAGAATATTTTCAGAGATAAAGGAGAACACGCATTAATTAT  
ATATGATGATTTAAGTAAACATGCAGTAGCATATCGTCAAATGTCTTTATTATTAAGACG  
TCCACCAGGACGA  
>KF662096.1\_Cavenderia\_exigua\_KP94  
-----AC-----  
--AAGATTAATTAGTTTAGAAAAGAAAAGCACCAGGAATTGTAAGTAACTAGAAAATCTGTACAT  
GAATCTATGTTAACAGGAGTAAAAATTGTTGATGCATTATTACCAATTGGAAGAGGACAA  
CGTGAATTAATTATTGGAGATCGTCAAACAGGAAAGTCTTCAATTGCAATTGATGCAATT  
CTTAACCAAA---AAACAA--ATAAAGATATTATT-----TGTGTCTATGTTCCGTAGG  
TCAAAAAAAAATCTACAATTAGAAGATTAGTAGAAATGTTAAATACAAAAGGATCTTTAAA  
ATATAGTATTGTTAGTAGTCTACTGCATCAGATGCATCTCCATTACAATCTTAGCACC  
TTATACAGGATGTGCTATTGGAGAATATTTTCAGAGATAAAGGAGAACATGCTTTAATTAT  
TTATGATGATTTAAGTAAACATGCTGTAGCATATCGTCAAATGTCTTTATTATTAAGACG  
TCCACCAGGACGA  
>KF662071.1\_Cavenderia\_parvispora\_OS126  
GTATTAGGACAACCAATTGATGGAGGAGTAGAGTT--TAAAGATACAAAAACTAC----  
--ACGTTTGATCAGTTTAGAAAAGAAAAGCACCAGGAATTGTAACAAGAAAATCTGTACAT  
GAATCAATGTTAACAGGAATAAAAAATCGTAGATGCTTTGTTACCTATCGGAAGAGGTCAA  
CGTGAATTAATTATTGGAGATCGTCAAACAGGAAAAATCATCCATAGCGATTGATGCTATA  
CTAAATCAAA---AAACAA--ATAAAGATATTATT-----TGTGTATATGTATCAGTTGG  
ACAAAAAAAATCCACAATACGAAGATTAGTAGAAATGTTAAATAATAAAGGATCTTTAAA  
ATATAGTATAATCGTTGTCTCAACAGCATCAGATGCATCACCATTACAATTTTTAGCACC  
TTATACAGGATGTGCAATTGGAGAAATATTTTCAGAGATAAAGGAGAACATGCTTTAATTAT  
TTATGATGATTTAAGTAAACATGCAGTAGCCTACCGTCAAATGTCTTTATTATTAAGACG  
TCCACCAGGACGA  
>KF662072.1\_Cavenderia\_microspora\_Hagiwara143  
-----ACAAC-----  
--ACGTTTGATCAGTTTAGAAAAGAAAAGCACCAGGAATTGTAACAAGAAAATCTGTACAC  
GAATCAATGTTAACAGGAGTAAAAATTGTAGATGCTTTATTACCTATAGGAAGAGGTCAA  
CGGAATTAATCATTGGAGATCGTCAAACAGGAAAAATCATCAATAGCTATTGATGCTATA

CTAAACCAA---AAACAA--ATAAAGATATTATT-----TGTGTATATGTATCAGTAGG  
ACAAAAAAAAATCCACAATAAGAAGATTAGTTGAAATGTTAAATAATAAAGGATCTTTAAA  
ATATAGTGTAGTTGTAGTCTCAACAGCATCAGATGCATCACCATTACAATTTTAGCACC  
TTATACAGGATGTGCCATTGGTGAGTATTTACAGAGATAAAGGAGAACATGCTTTAATTAT  
TTATGATGATTTAAGTAAACATGCTGTAGCATATCGTCAAATGTCCTTATTAT-----

>NC\_002508.1\_Physarum\_polycephalum

TTATTAGGTCGTGTTGT-GATGGTATTGGTAATTTATCGATGGTGGTGAAACTATGCTTT  
TGAGGAATATCTCAATGTGAACGTAAAGCTCCTGGTGTTAT-ACTCGTGAATCTGTTACT  
GAA-CAATGTAACTGGT-TATAAAATGTTGATTCTATGTTACCTAT-GGACGTGGTCAA  
AGGGAACCTTATTGTTGGTGATCGT-AAACAGGTAAAACACTACTATTGCTAT-GATACTATT  
CTTAATCAACGTTATACAATGAAGAAGATATTGATCTTATTGTGTGTATGTTGGAATTGG  
TCAAAAAAAAAAGTTCTATTTGAATATTCAAACCTACTTCAAAAATAATAAAGCGCTC---A  
TTATACTACTATTGTTGCTGCAACGCTGCACAAAAGTGCCTCTCTT-CAGTTTATTGCTCC  
ATATACAGGATGTGC-ATTGCTGAATTTATCGTGAT-AAGGTGAACATGC-TTAATTAT  
TTATGATGATTTAACAAAACATGCTGCTGCTTAT-GACAATTATCTTTAT-ATTAAGACG  
CCCACCAGGACGT

Text S3. Alignment of *atp1* sequences on *Dictyostelium* tree

>KF662068.1\_Dictyostelium\_sp.\_TAS30A  
GTATTAGGACAACCAATTGATGGATTAGGAGAATT--ACAAGATACAAAACTAC-----  
--AAGAGTAATGAGTGTAGAAAAGAAAAGCACCAGGAATTGTAACAAGAAAATCAGTACAT  
GAATCAATGTTAACAGGAGTAAAAATTGTAGATGCATTATTACCAATTGGAAGAGGACAA  
AGGGAGTTAATCATTGGAGATAGACAAACAGGAAAATCAGCAATTGCAGTAGATGCAATC  
TTAAATCAAC---AAGTAA--ATAAAGATATTGTA-----TGTATTTACGTAGCTGTAGG  
ACAAAAAAAATCAACAGTAAAGAAGATTAGTAGAAAATGTTAAATACAAGAGGAGCATTAGA  
ATATACAATCGTAGTAGTATCAACAGCATCAGATGCAGCACCATTACAATTCCTTAGCACC  
ATATACAGGATGTACAATTGGAGAGTATTTCAGAGATGAAGGAAAACATGCATTAATCGT  
ATACGATGACTTAAGTAAACATGCAGTAGCATATAGACAAATGTCATTATTATTAAGAAG  
ACCACCAGGACGA

>MZ318391\_Dictyostelium\_robusticaule\_5729\_bai\_2021\_HMJAU\_MR305  
GTATTAGGACAACCAATTGATGGATTAGGAGAATT--ACAAGATACTAAAAACAAC-----  
--CAGAGTAATGAGTATTGAAAGAAAAGCACCAGGAATCGTAACAAGAAAATCAGTACAT  
GAATCAATGTTAACTGGAGTAAAAATCGTAGATGCATTATTACCAATCGGAAGAGGACAA  
AGGGAGTTAATTTATTGGAGATAGACAAACAGGAAAATCAGCAATTGCAGTAGATGCAATC  
TTAAATCAAC---AAGTAA--ATAAAGACATTGTA-----TGTATTTATGTAGCTGTAGG  
ACAAAAAAAATCAACAGTAAAGAAGATTAGTAGAAAATGTTAAACACAAGAGGAGCTTTAGA  
ATATACAATTGTAGTAGTATCAACAGCATCAGATGCAGCACCATTACAATTCCTTAGCACC  
ATATACAGGATGTACAATTGGAGAAATATTTCAGAGATGCAGGAAAACATGCATTAATTGT  
ATATGATGATTTAAGTAAACATGCAGTAGCATATAGACAAATGTCATTATTATTAAGAAG  
ACCACCAGGAAGA

>MZ318392\_Dictyostelium\_robusticaule\_5729\_huang\_2021\_HMJAU\_MR305  
GTATTAGGACAACCAATTGATGGATTAGGAGAATT--ACAAGATACTAAAAACAAC-----  
--CAGAGTAATGAGTATTGAAAGAAAAGCACCAGGAATCGTAACAAGAAAATCAGTACAT  
GAATCAATGTTAACTGGAGTAAAAATCGTAGATGCATTATTACCAATCGGAAGAGGACAA  
AGGGAGTTAATTTATTGGAGATAGACAAACAGGAAAATCAGCAATTGCAGTAGATGCAATC  
TTAAATCAAC---AAGTAA--ATAAAGACATTGTA-----TGTATTTATGTAGCTGTAGG  
ACAAAAAAAATCAACAGTAAAGAAGATTAGTAGAAAATGTTAAACACAAGAGGAGCTTTAGA  
ATATACAATTGTAGTAGTATCAACAGCATCAGATGCAGCACCATTACAATTCCTTAGCACC  
ATATACAGGATGTACAATTGGAGAAATATTTCAGAGATGCAGGAAAACATGCATTAATTGT  
ATATGATGATTTAAGTAAACATGCAGTAGCATATAGACAAATGTCATTATTATTAAGAAG  
ACCACCAGGAAGA

>MZ318393\_Dictyostelium\_mucoroides\_5735\_3\_23\_HMJAU\_MR303  
GTATTAGGACAACCAATTGATGGATTAGGAGAATT--ACAAGATACAAAACTAC-----  
--AAGAGTAATGAGTGTAGAAAAGAAAAGCACCAGGAATTGTAACAAGAAAATCAGTACAT  
GAATCAATGTTAACTGGAGTAAAAATCGTAGATGCATTATTACCAATCGGAAGAGGACAA  
AGGGAGTTAATTTATTGGAGATAGACAAACAGGAAAATCAGCAATTGCAGTAGATGCAATC  
TTAAATCAAC---AAGTAA--ATAAAGATATTGTA-----TGTATTTATGTAGCTGTAGG  
ACAAAAAAAATCAACAGTAAAGAAGATTAGTAGAAAATGTTAAACACAAGAGGAGCATTAGA  
GTATACAATTGTAGTAGTATCAACAGCATCAGATGCAGCACCATTACAATTCCTTAGCACC  
ATATACAGGATGTACAATCGGAGAGTATTTCAGAGATGAAGGAAAACATGCATTAATCGT  
ATACGATGACTTAAGTAAACATGCAGTAGCATATAGACAAATGTCATTATTATTAAGAAG  
ACCACCAGGAAGA

>MZ318394\_Dictyostelium\_discoideum\_5752\_3\_17\_HMJAU\_MR302  
GTATTAGGACAACCAATCGATGGATTAGGCGAATT--AAAAAGATACAAAAACAAC-----  
--AAGAGTAATGAGTGTAGAAAAGAAAAGCACCAGGAATAGTAACAAGAAAATCAGTACAT  
GAATCAATGTTAACAGGAGTAAAAATAGTAGATGCATTATTACCAATTGGAAGAGGACAA  
AGGGAGTTAATAATTGGAGATAGACAAACAGGAAAATCAGCAATAGCAGTAGATGCAATT  
TTAAATCAAC---AAGTAA--ATAAAGATATTGTA-----TGTATATATGTAGCAGTTGG  
ACAAAAAAAATCAACAGTTAGACGATTAGTAGAAAATGTTAAATACAAAAGGAGCATTAGA  
ATATACAATTGTCGTAGTATCAACAGCATCAGATGCAGCACCATTACAATTTTTCAGCACC  
ATATACAGGATGTACAATTGGAGAAATATTTTAGAGATGAAGGAAAACATGCATTAATAGT  
CTATGATGATTTAAGTAAACATGCAGTAGCATATCGACAAATGTCATTATTATTAAGAAG  
ACCACCAGGAAGA

>MZ318395\_Dictyostelium\_discoideum\_5751\_1\_23\_HMJAU\_MR302  
GTATTAGGACAACCAATCGATGGATTAGGCGAATT--AAAAAGATACAAAAACAAC-----  
--AAGAGTAATGAGTGTAGAAAAGAAAAGCACCAGGAATAGTAACAAGAAAATCAGTACAT  
GAATCAATGTTAACAGGAGTAAAAATAGTAGATGCATTATTACCAATTGGAAGAGGACAA  
AGGGAGTTAATAATTGGAGATAGACAAACAGGAAAATCAGCAATAGCAGTAGATGCAATT  
TTAAATCAAC---AAGTAA--ATAAAGATATTGTA-----TGTATATATGTAGCAGTTGG  
ACAAAAAAAATCAACAGTTAGACGATTAGTAGAAAATGTTAAATACAAAAGGAGCATTAGA  
ATATACAATTGTCGTAGTATCAACAGCATCAGATGCAGCACCATTACAATTTTTCAGCACC  
ATATACAGGATGTACAATTGGAGAAATATTTTAGAGATGAAGGAAAACATGCATTAATAGT  
CTATGATGATTTAAGTAAACATGCAGTAGCATATCGACAAATGTCATTATTATTAAGAAG  
ACCACCAGGAAGA

>AB000109.1\_Dictyostelium\_discoideum\_AX3  
GTATTAGGACAACCAATCGATGGATTAGGAGAATT--AAAAAGATACAAAAACAAC-----  
--AAGAGTAATGAGTGTAGAAAAGAAAAGCACCAGGAATAGTAACAAGAAAATCAGTACAT

GAATCAATGTTAACAGGAGTAAAAATAGTAGATGCATTATTACCAATTGGAAGAGGACAA  
AGGGAATTAATAATTGGAGATAGACAAACAGGAAAATCAGCAATAGCAGTAGATGCGATT  
TTAAATCAAC---AAGTAA--ATAAAGATATTGTA-----TGTATATATGTAGCAGTTGG  
ACAAAAAAAATCAACAGTTAGACGATTAGTAGAAAATGTTAAATACAAAAGGAGCATTAGA  
ATATACAATTGTCGTAGTATCAACAGCATCAGATGCAGCACCATTACAATTTTTAGCACC  
ATATACAGGATGTACAATTGGAGAATATTTTAGAGATGAAGGAAAACATGCATTAATAGT  
ATATGATGATTTAAGTAAACATGCAGTAGCATATCGACAAAATGTCATTATTATTAAGAAG  
ACCACCAGGAAGA

>DQ336395.4 *Dictyostelium citrinum*

GTATTAGGACAACCAATTGATGGATTAGGAGAATT--AAAAGATACTAAAACAAC-----  
--AAGAGTAATGAGTGTAGAAAAGAAAAGCACCAGGAATCGTAACACGAAAATCAGTACAT  
GAATCAATGTTAACAGGAGTAAAAATGGTAGATGCATTATTACCAATTGGAAGAGGACAA  
CGGGAATTAATTATTGGAGATCGACAAACCGGAAAATCAGCAATAGCAGTAGATGCAATT  
TTAAACCAAC---AAGTAA--ATAAAGATATCGTA-----TGTATCTATGTAGCAGTTGG  
ACAAAAAAAATCAACTGTACGACGATTAGTAGAAAATGTTAAATACAAAAGGAGCATTAGA  
ATATACAATTGTAGTAGTATCCACTGCATCAGATGCAGCACCATTACAATTTTTAGCACC  
ATATACAGGATGTACAATTGGAGAATATTTTCGAGATGAAGGAAAACATGCATTAATTGT  
TTATGATGATTTAAGTAAACATGCAGTAGCATATCGACAAAATGCTTTATTATTACGACG  
ACCACCAGGACGA

>NC\_002508.1 *Physarum polycephalum*

TTATTAGGTCGTGTTGT-GATGGTATTGGTAATTTATCGATGGTGGTGAACTATGCTTT  
TGAGGAATATCTCAATGTGAACGTAAGCTCCTGGTGTTAT-ACTCGTGAATCTGTTACT  
GAA-CAATGTTAACTGGT-TATAAAATGTTGATTCTATGTTACCTAT-GGACGTGGTCAA  
AGGGAAC TTATTGTTGGTGATCGT-AAACAGGTAAAAC TACTATTGCTAT-GATACTATT  
CTTAATCAACGTTATACAATGAAGAAGATATTGATCTTATTGTGTGTATGTTGGAATTGG  
TCAAAAAAAAAGTTCTATTTGAAATATTCAAAC TACTTCAAAAATAATAAAGCGCTC---A  
TTATACTACTATTGTTGCTGCAACGCTGCACAAAAGTGCCTCTCTT-CAGTTTATTGCTCC  
ATATACAGGATGTGC-ATTGCTGAATTTATCGTGAT-AAGGTGAACATGC-TTAATTAT  
TTATGATGATTTAACAACATGCTGCTGCTTAT-GACAATTATCTTTAT-ATTAAGACG  
CCCACCAGGACGT

Text S4. Alignment of *atp1* sequences on *Heterostelium* tree

>MZ318386 *Heterostelium*\_recretum\_5756\_1\_17\_HMJAU\_MR315  
GTATTAGGACAACCAATCGATGGAAAAACGAAAT--TAAAGAAAATAAAAAATGC-----  
--AAGATTAATTAGTTTAGAAAAGAAAAGCTCCAGGATTTGTAACAGAAAATCTGTACAT  
GAATCTATGTTAACTGGAGTTAAAAATTGTAGATGCATTATTACCTATTGGAAGAGGACAA  
AGAGAGTTAATTATTGGAGATCGTCAAAACAGGAAAATCTGCAATTGCAATTGACGCAATT  
TTAAATCAAA---AAACAA--ATAAAGATATTATT-----TGTGTTTATGTTTCTGTAGG  
ACAAAAAAAATCTACAATTAGAAGATTAGTAGAAATGTTAAATATGAGAGGAGCATTAGA  
ATATAGTATTGTAGTAGTTTCTACTGCATCTGATGCATCTCCATTACAATTCTTAGCACC  
ATATTCTGGATGTGCAATTGGAGAATTTTTAGAGATAAAGGAGAACATGCTTTAATTAT  
TTATGATGATTTAAGTAAACATGCTGTAGCTTATCGTCAAAATGTCTTTATTATTAAGAAG  
ACCACCAGGAAGA

>MZ318387 *Heterostelium*\_pallidum\_5759\_2\_23\_HMJAU\_MR314  
GTATTAGGACAACCAATTGATGGAAAAATGAAAT--TAAAGAAAATAAAAAATGC-----  
--AAGATTAATTAGTTTAGAAAAGAAAAGCTCCAGGAATTGTAACAAGAAAATCTGTACAT  
GAATCTATGTTAACAGGAGTAAAAATTGTAGATGCATTATTACCAATTGGAAGAGGACAA  
AGGGAATTAATTATTGGAGATCGTCAAAACAGGAAAATCTGCAATTGCAATTGATGCAATT  
TTAAATCAAA---AAACAA--ATAAAGATATTATT-----TGTGTATATGTATCTGTAGG  
ACAAAAAAAATCTACAATTAGAAGATTAGTAGAAATGTTAAATATGAAAGGAGCATTAGA  
TTATAGTATCGTTGTAGTATCTACAGCATCTGATGCATCTCCATTACAATTCTTAGCACC  
ATATTCAGGATGTGCTATTGGAGAATTTCTTAGAGATAAAGGAGAACATGCATTAATTAT  
TTATGATGATTTAAGTAAACATGCAGTAGCATATCGTCAAAATGTCTTTATTATTAAGAAG  
ACCTCCAGGAAGA

>MZ318388 *Heterostelium*\_pallidum\_5759\_1\_23\_HMJAU\_MR314  
GTATTAGGACAACCAATTGATGGAAAAATGAAAT--TAAAGAAAATAAAAAATGC-----  
--AAGATTAATTAGTTTAGAAAAGAAAAGCTCCAGGAATTGTAACAAGAAAATCTGTACAT  
GAATCTATGTTAACAGGAGTAAAAATTGTAGATGCATTATTACCAATTGGAAGAGGACAA  
AGGGAATTAATTATTGGAGATCGTCAAAACAGGAAAATCTGCAATTGCAATTGATGCAATT  
TTAAATCAAA---AAACAA--ATAAAGATATTATT-----TGTGTATATGTATCTGTAGG  
ACAAAAAAAATCTACAATTAGAAGATTAGTAGAAATGTTAAATATGAAAGGAGCATTAGA  
TTATAGTATCGTTGTAGTATCTACAGCATCTGATGCATCTCCATTACAATTCTTAGCACC  
ATATTCAGGATGTGCTATTGGAGAATTTCTTAGAGATAAAGGAGAACATGCATTAATTAT  
TTATGATGATTTAAGTAAACATGCAGTAGCATATCGTCAAAATGTCTTTATTATTAAGAAG  
ACCTCCAGGAAGA

>AY700145.1 *Heterostelium*\_pallidum\_CK8  
GTATTAGGACAACCAATTGATGGAAAAATGAAAT--TAAAGAAAATAAAAAATGC-----  
--AAGATTAATTAGTTTAGAAAAGAAAAGCTCCAGGAATTGTAACAAGAAAATCTGTACAT  
GAATCTATGTTAACAGGAGTAAAAATTGTAGATGCATTATTACCAATTGGAAGAGGACAA  
AGGGAATTAATTATTGGAGATCGTCAAAACAGGAAAATCTGCAATTGCAATTGATGCAATT  
TTAAATCAAA---AAACAA--ATAAAGATATTATT-----TGTGTATATGTATCTGTAGG  
ACAAAAAAAATCTACAATTAGAAGATTAGTAGAAATGTTAAATATGAAAGGAGCATTAGA  
TTATAGTATCGTTGTAGTATCTACAGCATCTGATGCATCTCCATTACAATTCTTAGCACC  
ATATTCAGGATGTGCTATTGGAGAATTTCTTAGAGATAAAGGAGAACATGCATTAATTAT  
TTATGATGATTTAAGTAAACATGCAGTAGCATATCGTCAAAATGTCTTTATTATTAAGAAG  
ACCTCCAGGAAGA

>EU275726.1 *Heterostelium*\_pallidum\_PN500  
GTATTAGGACAACCAATTGATGGAAAAATGAAAT--TAAAGAAAATAAAAAATGC-----  
--AAGATTAATTAGTTTAGAAAAGAAAAGCTCCAGGAATTGTAACAGAAAATCTGTACAT  
GAATCTATGTTAACAGGAGTAAAAATTGTAGATGCATTATTACCTATTGGACGTGGACAA  
CGTGAGTTAATTATTGGAGATCGTCAAAACAGGAAAATCTGCGATTGCAATTGATGCTATT  
TTAAATCAAA---AAACAA--ATAAAGATATTATT-----TGTGTATACGTATCTGTAGG  
ACAAAAAAAATCTACAATTAGAAGATTAGTAGAAATGTTAAATATGAAAGGAGCTTTAGA  
GTATAGTATTATAGTAGTTTCTACAGCATCTGATGCATCTCCTTTACAATTTTAGCACC  
ATATTCTGGATGTGCAATTGGAGAATTTCTCAGAGATAAAGGAGAACATGCTTTAATTAT  
TTATGATGATTTAAGTAAACATGCTGTAGCATATCGTCAAAATGTCTTTATTATTAAGAAG  
ACCTCCAGGAAGA

>NC\_002508.1 *Physarum*\_polycephalum  
TTATTAGGTCGTGTTGT-GATGGTATTGGTAATTTATCGATGGTGGTGAACTATGCTTT  
TGAGGAATATCTCAATGTGAACGTAAAGCTCCTGGTGTAT-ACTCGTGAATCTGTTACT  
GAA-CAATGTTAACTGGT-TATAAAAATGTTGATTCTATGTTACCTAT-GGACGTGGTCAA  
AGGGAACCTATTGTTGGTGATCGT-AAACAGGTAAAACACTATTGCTAT-GATACTATT  
CTTAATCAACGTTATACAATGAAGAAGATATTGATCTTATTGTGTGATGTTGGAATTGG  
TCAAAAAAAAAGTTCTATTGTAATTTCAAACACTACTTCAAAAATAATAAAGCGCTC--A  
TTATACTACTATTGTTGCTGCAACGCTGCACAAAAGTGCCTCTCTT-CAGTTTATTGCTCC  
ATATACAGGATGTGC-ATTGCTGAATTTATCGTGAT-AAGGTGAACATGC-TTAATTAT  
TTATGATGATTTAACAACATGCTGCTGCTTAT-GACAATTATCTTTAT-ATTAAGACG  
CCCACCAGGACGT

## References

1. Hagiwara H, Chien CY, Yeh ZY. 1992. Dictyostelid cellular slime molds of Taiwan. Bulletin of the National Science Museum, Tokyo, Series B 18:39–52.
2. Yeh ZY, Chien CY. 1983. Cellular slime molds in Taiwan (I): four newly recorded species. Biological Bulletin of National Taiwan Normal University 18:69–86.
3. Fan YC, Chen JW, Yeh ZY. 2002. Notes on dictyostelid cellular slime molds of Taiwan (I): *Dictyostelium minutum* and *Dictyostelium clavatum*. Taiwania 47:31–36.
4. An X, Liu P, Li Y. 2018. The life cycle of *Dictyostelium firmibasis*. Mycosystema 37:516–521 (in Chinese).
5. Hagiwara H, Yeh ZY, Chien CY. 1985. *Dictyostelium macrocephalum*, a new dictyostelid cellular slime mold from Taiwan. Bulletin of the National Science Museum, Tokyo, Series B 11:103–108.
6. Liu P, Li Y. 2014. Dictyostelids from Jilin Province, China. I. Phytotaxa 183:279–283.
7. Yeh ZY. 2003. Biodiversity inventory of dictyostelid cellular slime molds in Taiwan. Mycotaxon 86:103–110.
8. Fan YC, Yeh ZY. 2001. Notes on a dictyostelid cellular slime mold new to Taiwan. BioFormosa 36:43–46.
9. Liu P, Zhang SH, Zhou XY, Zhao JJ, Li Y. 2019. Two *Heterostelium* species newly recorded from China. Mycotaxon 134:353–357.
10. He XL, Li Y. 2008. Three new records of dictyostelids in China. Mycosystema 27:532–537.
11. Lin SP, Yeh ZY. 1999. Six species of dictyostelid cellular slime molds isolated from YangMing Shan district of Taipei. Biological Bulletin of National Taiwan Normal University 34:69–80 (in Chinese).
12. Hsu SL, Fan YC, Ma MS, Chou HM, Yeh ZY. 2001. *Dictyostelium delicatum*, a new record of dictyostelid cellular slime molds to Taiwan. Taiwania 46:199–203.
13. Yeh ZY, Chen MJ. 2004. Notes on dictyostelid cellular slime molds from Taiwan (2): *Dictyostelium exiguum* and its ITS-5.8S rDNA sequences. Mycotaxon 89:489–496.
